# Supplementary material for: Involvement of SPATA31 copy number variable genes in human lifespan
Source: Aging (Albany NY). 2018 Apr 19;10(4):674–88. doi: 10.18632/aging.101421 (PMC5940121; doi:10.18632/aging.101421)
Supplement: Supplementary Table S1 [file aging-10-101421-s002.xlsx]

## Sheet: Table 1a pS_vs_pE_exp. results
Gene ID	baseMean	log2FoldChange	lfcSE	stat	pvalue	padj
ENSG00000111341	8306.97	-2.49664	0.111599	-22.3716	7.44525e-111	1.34439e-106
ENSG00000077943	331.494	-2.49501	0.119079	-20.9526	1.77591e-97	1.60338e-93
ENSG00000147041	205.631	-2.23441	0.116229	-19.2242	2.32293e-82	1.39817e-78
ENSG00000158258	2525.3	-1.34048	0.0703493	-19.0546	6.0226e-81	2.71875e-77
ENSG00000104435	806.366	1.65409	0.088453	18.7002	4.93221e-78	1.78122e-74
ENSG00000073756	1120.26	1.58922	0.0925822	17.1655	4.81448e-66	1.44892e-62
ENSG00000166106	1271.51	-1.51355	0.0906178	-16.7025	1.25635e-62	3.24084e-59
ENSG00000120708	34730.3	0.585247	0.0352125	16.6204	4.95633e-62	1.11871e-58
ENSG00000182195	474.605	1.51392	0.0916416	16.52	2.63325e-61	5.28318e-58
ENSG00000060718	8753.93	0.786883	0.0482359	16.3132	7.94789e-60	1.43515e-56
ENSG00000206190	1099.93	1.10559	0.0689121	16.0435	6.34802e-58	1.04206e-54
ENSG00000105989	4961.46	-0.910873	0.0571549	-15.9369	3.51204e-57	5.28474e-54
ENSG00000151320	1167.63	0.944205	0.0603522	15.6449	3.59783e-55	4.99739e-52
ENSG00000164122	315.152	1.71314	0.109874	15.5918	8.27355e-55	1.06711e-51
ENSG00000104332	5854.74	-0.901857	0.0580147	-15.5453	1.71213e-54	2.06106e-51
ENSG00000133048	112.405	2.11095	0.136256	15.4925	3.90132e-54	4.40289e-51
ENSG00000145819	1969.28	-0.944498	0.0631978	-14.9451	1.67613e-50	1.78035e-47
ENSG00000041982	3432.33	0.913357	0.061702	14.8027	1.40694e-49	1.4114e-46
ENSG00000106483	901.805	-1.31841	0.0892449	-14.773	2.1887e-49	2.08007e-46
ENSG00000154330	426.602	1.32845	0.0900672	14.7495	3.09961e-49	2.79848e-46
ENSG00000196562	8999.17	-0.923997	0.0634546	-14.5615	4.93291e-48	4.2416e-45
ENSG00000110092	11391.9	0.576823	0.039863	14.4701	1.87082e-47	1.53552e-44
ENSG00000113361	1513.76	-1.02362	0.0708285	-14.4521	2.43281e-47	1.90997e-44
ENSG00000140557	171.664	-1.67475	0.116537	-14.371	7.86799e-47	5.91968e-44
ENSG00000139132	1046.53	-0.928041	0.0647723	-14.3278	1.46797e-46	1.06029e-43
ENSG00000167772	1284.05	0.936142	0.066397	14.0991	3.84385e-45	2.66955e-42
ENSG00000166396	594.167	1.10535	0.0792268	13.9517	3.07106e-44	2.05385e-41
ENSG00000138735	6491.38	-0.802726	0.0580334	-13.8321	1.63074e-43	1.05165e-40
ENSG00000133169	165.697	2.06868	0.149877	13.8025	2.46219e-43	1.5331e-40
ENSG00000003137	1068.42	0.803932	0.0584372	13.7572	4.60993e-43	2.77472e-40
ENSG00000158270	40248.7	-0.70726	0.0514511	-13.7463	5.36214e-43	3.12336e-40
ENSG00000167244	10998.1	-1.01621	0.0756681	-13.4298	4.0464e-41	2.28331e-38
ENSG00000145244	218.23	1.4529	0.108377	13.406	5.57761e-41	3.05197e-38
ENSG00000096696	3075.65	1.0018	0.0752327	13.3161	1.8664e-40	9.91223e-38
ENSG00000143869	187.694	-1.53308	0.115655	-13.2557	4.1822e-40	2.15766e-37
ENSG00000124212	10324.3	-0.889246	0.0671815	-13.2365	5.40299e-40	2.71005e-37
ENSG00000155511	2814.16	-0.892331	0.0678827	-13.1452	1.8134e-39	8.84986e-37
ENSG00000162493	1415	-0.885773	0.0680975	-13.0074	1.11004e-38	5.27473e-36
ENSG00000116991	565.001	-0.990722	0.0764219	-12.9639	1.96133e-38	9.08095e-36
ENSG00000138449	302.853	-1.4317	0.11056	-12.9495	2.36338e-38	1.06689e-35
ENSG00000186281	60.7393	2.05733	0.160959	12.7818	2.07311e-37	9.13027e-35
ENSG00000169213	7558.37	0.609152	0.0492527	12.3679	3.89963e-35	1.67656e-32
ENSG00000010932	287.175	-1.37382	0.112367	-12.2261	2.25485e-34	9.46881e-32
ENSG00000101955	3096.87	-0.830966	0.0683694	-12.1541	5.45874e-34	2.24019e-31
ENSG00000176928	1268	-0.807216	0.0665795	-12.1241	7.8734e-34	3.15933e-31
ENSG00000106366	48747.9	0.77204	0.0642715	12.0122	3.06706e-33	1.20395e-30
ENSG00000138623	2213.31	0.79084	0.0658605	12.0078	3.23307e-33	1.21624e-30
ENSG00000197632	120.187	1.54656	0.128796	12.0078	3.23266e-33	1.21624e-30
ENSG00000164292	29330.8	-0.454697	0.0380373	-11.954	6.18954e-33	2.28091e-30
ENSG00000148175	14993.3	-0.532505	0.0448601	-11.8704	1.68739e-32	6.09382e-30
ENSG00000104368	3240.8	0.736096	0.0620203	11.8686	1.72263e-32	6.09911e-30
ENSG00000185633	854.598	1.30701	0.111324	11.7405	7.89829e-32	2.74268e-29
ENSG00000172061	1108.58	0.806113	0.0689869	11.685	1.52051e-31	5.08443e-29
ENSG00000198910	15069.9	1.08861	0.0931569	11.6858	1.50654e-31	5.08443e-29
ENSG00000149948	2404	0.753751	0.0656308	11.4847	1.57429e-30	5.16854e-28
ENSG00000035664	1014.14	-0.829193	0.0745345	-11.125	9.48459e-29	3.05827e-26
ENSG00000102837	129.209	-1.39128	0.12597	-11.0445	2.33139e-28	7.38559e-26
ENSG00000183098	4577.92	-0.710287	0.0649135	-10.942	7.25413e-28	2.25841e-25
ENSG00000157404	1020.9	-0.86352	0.0791182	-10.9143	9.84801e-28	3.01399e-25
ENSG00000054598	2061.62	-0.558096	0.051238	-10.8922	1.25517e-27	3.77744e-25
ENSG00000022267	72586.5	-0.413326	0.0382448	-10.8074	3.17669e-27	9.40351e-25
ENSG00000146411	473.803	-0.952022	0.0885073	-10.7564	5.52695e-27	1.60968e-24
ENSG00000138061	2816.06	-0.97136	0.0908005	-10.6977	1.04291e-26	2.98918e-24
ENSG00000135218	1075.14	1.09235	0.102791	10.6269	2.23454e-26	6.30453e-24
ENSG00000138356	1774.14	0.666946	0.0630628	10.5759	3.85468e-26	1.07083e-23
ENSG00000119138	5456.47	-0.54716	0.0518485	-10.553	4.91789e-26	1.34549e-23
ENSG00000120899	1714.47	-0.831199	0.0788031	-10.5478	5.20036e-26	1.40154e-23
ENSG00000143847	952.821	0.713874	0.0677312	10.5398	5.66159e-26	1.5034e-23
ENSG00000111674	3340.8	0.489336	0.0466295	10.4941	9.1927e-26	2.40569e-23
ENSG00000115380	60576.1	-0.552467	0.0527374	-10.4758	1.11574e-25	2.87812e-23
ENSG00000053747	6188.17	-0.722314	0.0690828	-10.4558	1.37857e-25	3.50603e-23
ENSG00000149294	303.828	0.968417	0.0927542	10.4407	1.61632e-25	4.0536e-23
ENSG00000102359	1349.82	0.62957	0.0604706	10.4112	2.20511e-25	5.45448e-23
ENSG00000137573	105949	-0.490951	0.0478549	-10.2592	1.07634e-24	2.62642e-22
ENSG00000135318	1853.4	0.643898	0.0627771	10.2569	1.10192e-24	2.65298e-22
ENSG00000152092	230.507	1.21068	0.118908	10.1816	2.39471e-24	5.68965e-22
ENSG00000113805	459.143	0.797458	0.0793434	10.0507	9.12054e-24	2.13883e-21
ENSG00000148053	373.533	-1.11832	0.111644	-10.0169	1.28512e-23	2.97506e-21
ENSG00000197381	3239.5	-0.628059	0.0630594	-9.95979	2.28538e-23	5.22368e-21
ENSG00000154122	5022.08	-0.4596	0.0462354	-9.94045	2.77577e-23	6.26526e-21
ENSG00000077157	2031.25	-0.674806	0.0680201	-9.92069	3.38406e-23	7.54394e-21
ENSG00000120875	1613.19	0.670537	0.0676133	9.91725	3.50283e-23	7.71349e-21
ENSG00000105538	38.636	1.58645	0.161338	9.83308	8.11006e-23	1.76438e-20
ENSG00000174136	1966.42	0.68378	0.0699863	9.77019	1.51171e-22	3.22667e-20
ENSG00000154864	1568.81	-0.782248	0.0800687	-9.76971	1.5189e-22	3.22667e-20
ENSG00000169432	2233.84	0.861308	0.0884159	9.74154	2.00488e-22	4.20956e-20
ENSG00000165507	530.452	-1.10267	0.114055	-9.6679	4.12781e-22	8.56733e-20
ENSG00000107731	2534.07	0.633472	0.0658085	9.62599	6.21036e-22	1.27432e-19
ENSG00000171617	1150.26	0.741095	0.0770119	9.62312	6.38627e-22	1.2957e-19
ENSG00000108691	2542.45	0.639125	0.0668403	9.56197	1.15538e-21	2.31807e-19
ENSG00000221852	2167.85	0.59216	0.0623667	9.49482	2.20592e-21	4.37717e-19
ENSG00000118257	1348.36	-0.787055	0.0830779	-9.4737	2.70097e-21	5.30124e-19
ENSG00000139055	59.9741	-1.41649	0.149586	-9.46943	2.81376e-21	5.46323e-19
ENSG00000162496	10452.6	-0.877968	0.0931422	-9.42611	4.2557e-21	8.17502e-19
ENSG00000175592	1293.86	0.717233	0.0761404	9.41986	4.51678e-21	8.58521e-19
ENSG00000111186	2825.65	0.540011	0.0574178	9.40494	5.20592e-21	9.79201e-19
ENSG00000176658	5165.31	0.365514	0.038915	9.39262	5.85232e-21	1.08944e-18
ENSG00000162645	351.389	-1.08166	0.115682	-9.35033	8.73779e-21	1.60998e-18
ENSG00000138131	30191	0.743451	0.0796234	9.33709	9.90196e-21	1.80606e-18
ENSG00000118849	486.052	-0.699628	0.0750381	-9.32364	1.12419e-20	2.02994e-18
ENSG00000221963	1990.06	-0.486099	0.0522372	-9.30562	1.33216e-20	2.38166e-18
ENSG00000185697	455.959	1.047	0.112555	9.30217	1.37613e-20	2.43615e-18
ENSG00000235750	345.684	-0.909954	0.0987006	-9.21933	2.98961e-20	5.24111e-18
ENSG00000204849	18.9329	1.45153	0.157852	9.19548	3.7333e-20	6.48193e-18
ENSG00000157766	2170.42	-1.46059	0.158953	-9.18883	3.97138e-20	6.82964e-18
ENSG00000110031	399.471	0.88509	0.0969577	9.12862	6.93771e-20	1.18183e-17
ENSG00000100342	203.307	-1.07195	0.117465	-9.12567	7.12932e-20	1.20312e-17
ENSG00000134853	7829.56	-0.688183	0.0756097	-9.10177	8.88692e-20	1.48584e-17
ENSG00000143772	1553.22	-0.693268	0.0766021	-9.05024	1.42654e-19	2.36321e-17
ENSG00000144218	2814.42	-0.43426	0.0480378	-9.03996	1.56726e-19	2.57273e-17
ENSG00000151617	491.116	-0.797866	0.0883522	-9.03052	1.7086e-19	2.77948e-17
ENSG00000106484	4097.39	-0.773272	0.0857379	-9.01902	1.89772e-19	3.05956e-17
ENSG00000173706	36718.7	-0.44076	0.04899	-8.99695	2.3207e-19	3.70839e-17
ENSG00000249992	539.79	0.736198	0.0818889	8.99021	2.46769e-19	3.90869e-17
ENSG00000151748	2821.11	-0.417542	0.0466314	-8.95411	3.42498e-19	5.37781e-17
ENSG00000170542	570.758	-0.74692	0.0835221	-8.94278	3.79499e-19	5.90742e-17
ENSG00000164619	699.513	0.653066	0.0733428	8.9043	5.37243e-19	8.29145e-17
ENSG00000173221	2831.81	0.460894	0.0517833	8.90044	5.56254e-19	8.5121e-17
ENSG00000072682	11716.7	0.474736	0.0534194	8.88697	6.27996e-19	9.52918e-17
ENSG00000131737	11638.3	0.874724	0.0987955	8.85388	8.45314e-19	1.27199e-16
ENSG00000162738	131.426	-1.11851	0.126858	-8.81706	1.17506e-18	1.74783e-16
ENSG00000101384	975.317	-0.624899	0.0708783	-8.8165	1.1809e-18	1.74783e-16
ENSG00000138435	21.2348	1.38006	0.15802	8.73346	2.47004e-18	3.62614e-16
ENSG00000163359	129510	0.500756	0.0573495	8.73166	2.50954e-18	3.65442e-16
ENSG00000076258	686.96	-0.713056	0.0818557	-8.71113	3.00865e-18	4.34618e-16
ENSG00000196616	62.6941	-1.38117	0.160072	-8.62847	6.21773e-18	8.9106e-16
ENSG00000104081	395.263	-1.04384	0.121402	-8.59816	8.10067e-18	1.15176e-15
ENSG00000157680	153.155	1.20119	0.140389	8.55616	1.16685e-17	1.64608e-15
ENSG00000112902	12276.3	-0.499152	0.0584508	-8.5397	1.34568e-17	1.88364e-15
ENSG00000139629	601.539	0.707052	0.0828266	8.53653	1.38312e-17	1.92115e-15
ENSG00000064042	4182.17	-0.556286	0.0652631	-8.52374	1.54487e-17	2.12945e-15
ENSG00000164093	37.4383	1.35446	0.159362	8.49925	1.90818e-17	2.61031e-15
ENSG00000151892	6067.97	-0.373065	0.0440181	-8.47526	2.34555e-17	3.18449e-15
ENSG00000115468	2570.11	-0.614255	0.0724907	-8.47356	2.3801e-17	3.20727e-15
ENSG00000253873	414.453	0.745187	0.0881246	8.45606	2.76572e-17	3.69931e-15
ENSG00000131016	22834.9	-0.508098	0.0601866	-8.44204	3.11837e-17	4.14033e-15
ENSG00000163814	503.874	0.74547	0.0883327	8.43934	3.19128e-17	4.20619e-15
ENSG00000213626	2069.47	-0.770305	0.0913725	-8.43038	3.44545e-17	4.5083e-15
ENSG00000128805	261.251	0.871648	0.103567	8.41624	3.88771e-17	5.05039e-15
ENSG00000103888	89636.9	-0.535434	0.063738	-8.40055	4.44409e-17	5.73192e-15
ENSG00000173210	748.189	0.65118	0.0775244	8.39969	4.4767e-17	5.73303e-15
ENSG00000119508	292.573	-0.837797	0.0998593	-8.38977	4.87075e-17	6.19375e-15
ENSG00000138675	1637.08	0.54795	0.0653544	8.38429	5.10334e-17	6.44413e-15
ENSG00000175928	53.1037	-1.3285	0.158686	-8.37188	5.67049e-17	7.11056e-15
ENSG00000143028	3784.05	-0.553734	0.066818	-8.2872	1.15945e-16	1.44388e-14
ENSG00000107968	638.689	-0.577092	0.070034	-8.24017	1.71964e-16	2.12682e-14
ENSG00000163083	1406.43	0.811053	0.0985702	8.22817	1.90091e-16	2.33502e-14
ENSG00000115414	381242	0.504699	0.0613669	8.22429	1.96356e-16	2.39568e-14
ENSG00000183287	1273.31	0.56006	0.0682383	8.20741	2.26018e-16	2.73906e-14
ENSG00000213160	467.153	-0.802539	0.097876	-8.19955	2.4129e-16	2.90465e-14
ENSG00000185442	1587.18	-0.588341	0.0717779	-8.19669	2.47097e-16	2.95486e-14
ENSG00000131389	5131.16	-0.719568	0.0877963	-8.19588	2.48773e-16	2.95533e-14
ENSG00000197971	215.377	-0.822901	0.100468	-8.19067	2.59777e-16	3.06587e-14
ENSG00000170961	52.3636	1.27297	0.155679	8.17686	2.91336e-16	3.41601e-14
ENSG00000100181	145.183	1.01487	0.124237	8.16881	3.11459e-16	3.62839e-14
ENSG00000135744	101.219	-1.23936	0.152012	-8.15303	3.54916e-16	4.10815e-14
ENSG00000052850	2353.04	-0.514245	0.0631976	-8.13709	4.04884e-16	4.65668e-14
ENSG00000122378	478.326	-0.689765	0.0848458	-8.12963	4.30619e-16	4.92132e-14
ENSG00000142227	4783.81	0.395939	0.0487299	8.12518	4.46703e-16	5.07303e-14
ENSG00000006059	309.927	0.937332	0.115451	8.11888	4.7052e-16	5.31011e-14
ENSG00000135404	31586.1	0.296109	0.0366449	8.08048	6.45105e-16	7.23519e-14
ENSG00000253953	387.518	0.818238	0.101433	8.06676	7.21888e-16	8.04638e-14
ENSG00000164764	986.89	-0.624971	0.0775725	-8.05661	7.84392e-16	8.68943e-14
ENSG00000156113	575.87	0.625494	0.0776553	8.05475	7.96444e-16	8.76914e-14
ENSG00000134107	1642.66	0.430476	0.0536451	8.02451	1.01929e-15	1.11548e-13
ENSG00000172348	703.957	-0.611464	0.0764381	-7.99947	1.2496e-15	1.35928e-13
ENSG00000049130	2936.18	0.636141	0.079813	7.97039	1.58177e-15	1.7103e-13
ENSG00000143369	2543.12	0.749781	0.0942634	7.9541	1.80436e-15	1.93937e-13
ENSG00000138193	2247.2	-0.52613	0.0661929	-7.94842	1.889e-15	2.01832e-13
ENSG00000228630	235.404	-0.903605	0.114118	-7.91819	2.4099e-15	2.55974e-13
ENSG00000117143	5060.73	0.559983	0.0707731	7.91237	2.52541e-15	2.66674e-13
ENSG00000113205	117.526	0.967927	0.123296	7.85043	4.14611e-15	4.35269e-13
ENSG00000170836	1015.76	-0.519492	0.0664135	-7.82208	5.19565e-15	5.423e-13
ENSG00000144810	6518.61	0.496131	0.063506	7.81235	5.61311e-15	5.82505e-13
ENSG00000052126	2100.93	-0.644102	0.0825494	-7.80263	6.06297e-15	6.25594e-13
ENSG00000142871	39440.8	0.432633	0.0554887	7.79679	6.35022e-15	6.51511e-13
ENSG00000054654	567.201	-0.618116	0.0793902	-7.7858	6.92739e-15	7.06711e-13
ENSG00000205221	43.4136	-1.22506	0.157971	-7.75493	8.83907e-15	8.9667e-13
ENSG00000148773	1713.15	0.531664	0.0685798	7.75249	9.01104e-15	9.09008e-13
ENSG00000102802	108.113	1.10569	0.142808	7.74248	9.74996e-15	9.78084e-13
ENSG00000162989	91.1744	-1.1992	0.155184	-7.7276	1.09591e-14	1.09331e-12
ENSG00000130962	1901.8	-0.441832	0.0573703	-7.70141	1.34577e-14	1.3352e-12
ENSG00000171724	76.7698	-1.20911	0.157038	-7.6995	1.36594e-14	1.34781e-12
ENSG00000127241	20803.8	-0.386101	0.0505025	-7.6452	2.08623e-14	2.04734e-12
ENSG00000000971	895.386	0.544742	0.0716515	7.60267	2.90082e-14	2.83136e-12
ENSG00000124882	173.902	1.0573	0.139133	7.59924	2.97884e-14	2.89187e-12
ENSG00000159217	1081.79	-0.45111	0.0596043	-7.56842	3.77786e-14	3.64796e-12
ENSG00000156414	36.8357	-1.20713	0.159633	-7.56188	3.97276e-14	3.81575e-12
ENSG00000170396	54.6341	-1.17519	0.155472	-7.55889	4.06513e-14	3.88382e-12
ENSG00000038295	67.1255	1.12997	0.149608	7.55291	4.25654e-14	4.04528e-12
ENSG00000186479	94.249	-1.04335	0.138153	-7.55217	4.2807e-14	4.04694e-12
ENSG00000164733	81904.5	0.457064	0.060575	7.54542	4.50849e-14	4.19701e-12
ENSG00000164920	4656.24	-0.58893	0.0780516	-7.5454	4.50917e-14	4.19701e-12
ENSG00000172572	78.918	-1.1089	0.146963	-7.54547	4.50647e-14	4.19701e-12
ENSG00000133026	10770.6	-0.374223	0.0496539	-7.53664	4.82247e-14	4.46561e-12
ENSG00000095303	10640.1	0.384397	0.0511289	7.51819	5.55395e-14	5.11672e-12
ENSG00000111452	9238.54	-0.581813	0.0774126	-7.51573	5.65931e-14	5.18732e-12
ENSG00000167900	615.929	0.779134	0.103857	7.50197	6.28655e-14	5.73315e-12
ENSG00000116396	288.193	0.744435	0.0993571	7.49252	6.75653e-14	6.13078e-12
ENSG00000153094	258.888	-0.78625	0.105012	-7.48724	7.03344e-14	6.35014e-12
ENSG00000132561	1260.03	0.589594	0.0788577	7.47669	7.62184e-14	6.84715e-12
ENSG00000050165	18481.6	0.36581	0.048985	7.46779	8.15552e-14	7.29031e-12
ENSG00000086289	3005.78	-0.381211	0.0510586	-7.46616	8.25704e-14	7.3447e-12
ENSG00000108950	1484.17	-0.470754	0.0630905	-7.46156	8.55023e-14	7.56821e-12
ENSG00000125378	1316.49	-0.608066	0.0816148	-7.45044	9.30286e-14	8.19423e-12
ENSG00000171848	1151.36	0.650007	0.0873203	7.44394	9.77289e-14	8.56646e-12
ENSG00000111981	611.705	-0.603296	0.0810615	-7.44245	9.88385e-14	8.62187e-12
ENSG00000139668	670.363	0.55253	0.0744656	7.41994	1.17176e-13	1.01723e-11
ENSG00000008311	482.627	-0.613999	0.0833969	-7.36237	1.80672e-13	1.56096e-11
ENSG00000173376	39.741	1.14872	0.156314	7.34881	1.99981e-13	1.71955e-11
ENSG00000104321	31.4269	1.18215	0.160908	7.34674	2.03093e-13	1.73803e-11
ENSG00000126785	1236.96	0.517568	0.0705011	7.34127	2.11579e-13	1.80211e-11
ENSG00000164465	3190.89	0.431701	0.0590387	7.31216	2.62879e-13	2.22854e-11
ENSG00000272482	160.309	-0.949251	0.130522	-7.27272	3.52312e-13	2.97275e-11
ENSG00000117724	1173.64	0.534853	0.073637	7.26337	3.7757e-13	3.17106e-11
ENSG00000139289	1398.02	0.611763	0.0844321	7.24562	4.30477e-13	3.59867e-11
ENSG00000168916	443.781	-0.621618	0.085878	-7.23838	4.5406e-13	3.77832e-11
ENSG00000118473	124.553	0.931332	0.128709	7.23596	4.62248e-13	3.82881e-11
ENSG00000122035	395.462	-0.823031	0.113805	-7.23197	4.7604e-13	3.92505e-11
ENSG00000137727	390.707	-0.893141	0.123526	-7.23039	4.81609e-13	3.95291e-11
ENSG00000105974	44443.7	0.440339	0.0609261	7.22743	4.92218e-13	4.02171e-11
ENSG00000103485	324.545	-0.755201	0.104537	-7.22427	5.03784e-13	4.09767e-11
ENSG00000131979	170.818	-0.915713	0.127075	-7.20609	5.75826e-13	4.66264e-11
ENSG00000103647	348.06	0.754894	0.104887	7.19724	6.14445e-13	4.95314e-11
ENSG00000112984	734.465	0.625063	0.0869591	7.18801	6.57439e-13	5.27617e-11
ENSG00000110328	210.691	0.720701	0.101293	7.11503	1.11885e-12	8.93938e-11
ENSG00000168234	2536.03	-0.452958	0.0636802	-7.11302	1.13531e-12	9.03099e-11
ENSG00000139874	2346.39	0.44923	0.063192	7.10897	1.16915e-12	9.25939e-11
ENSG00000089685	498.67	0.698922	0.098365	7.10539	1.19979e-12	9.46054e-11
ENSG00000167552	20021.9	0.286011	0.0402932	7.09825	1.26347e-12	9.9193e-11
ENSG00000158473	128.806	-0.912185	0.128762	-7.08429	1.39758e-12	1.09247e-10
ENSG00000166825	23596.5	0.568483	0.0803229	7.07747	1.46807e-12	1.14263e-10
ENSG00000151690	1500.18	-0.438885	0.0620448	-7.07368	1.50874e-12	1.16924e-10
ENSG00000180801	1985.83	0.489732	0.0692963	7.06721	1.58082e-12	1.21986e-10
ENSG00000118898	1098.4	-0.556423	0.0788932	-7.05286	1.75283e-12	1.34685e-10
ENSG00000116106	3949.72	-0.527109	0.0747904	-7.04781	1.8175e-12	1.39062e-10
ENSG00000182261	256.706	0.68192	0.0968722	7.03937	1.93111e-12	1.47131e-10
ENSG00000075391	3078.22	-0.30028	0.0429016	-6.99926	2.57316e-12	1.95225e-10
ENSG00000139112	16790.9	-0.295953	0.0423924	-6.98126	2.9254e-12	2.21021e-10
ENSG00000176907	2950.54	-0.63853	0.0914787	-6.9801	2.94975e-12	2.21931e-10
ENSG00000122176	2836.83	-0.420277	0.0602329	-6.97753	3.00409e-12	2.25082e-10
ENSG00000082397	3999.8	-0.352767	0.0507553	-6.95036	3.6436e-12	2.7187e-10
ENSG00000115457	6975.97	-0.730494	0.105543	-6.92132	4.47458e-12	3.325e-10
ENSG00000143476	257.861	0.770398	0.11169	6.89764	5.28733e-12	3.91284e-10
ENSG00000132205	2243.52	-0.406628	0.0591989	-6.86884	6.47256e-12	4.77041e-10
ENSG00000154556	249.915	-0.773025	0.11258	-6.86642	6.58314e-12	4.83218e-10
ENSG00000119681	5211.49	0.497125	0.0724233	6.86415	6.68873e-12	4.88981e-10
ENSG00000173599	746.637	-0.649494	0.0948784	-6.84555	7.61844e-12	5.54702e-10
ENSG00000117643	286.56	-0.752314	0.110038	-6.83688	8.09338e-12	5.84569e-10
ENSG00000169174	110.831	-0.952467	0.139313	-6.83689	8.09308e-12	5.84569e-10
ENSG00000182836	18.3645	1.08627	0.159003	6.83175	8.38826e-12	6.03453e-10
ENSG00000261888	932.046	-0.489934	0.0719463	-6.80972	9.77906e-12	7.00716e-10
ENSG00000145934	2342.22	0.497506	0.0731412	6.80199	1.03181e-11	7.36419e-10
ENSG00000003989	70.6671	-1.04714	0.154127	-6.79405	1.0903e-11	7.75101e-10
ENSG00000163521	308.798	0.610843	0.0899764	6.78893	1.12968e-11	7.99605e-10
ENSG00000101412	214.135	0.779646	0.114849	6.78843	1.13363e-11	7.99605e-10
ENSG00000246763	354.121	0.611764	0.0901568	6.78556	1.15639e-11	8.12486e-10
ENSG00000108947	483.068	-0.577327	0.0854153	-6.75905	1.38895e-11	9.72101e-10
ENSG00000178573	1254.32	-0.398913	0.0590915	-6.75076	1.47074e-11	1.02537e-09
ENSG00000074410	1546.77	0.442148	0.065547	6.74552	1.52478e-11	1.05896e-09
ENSG00000258498	166.655	-0.85736	0.127234	-6.73844	1.60094e-11	1.10759e-09
ENSG00000242265	1473.44	0.447512	0.0665524	6.72421	1.76545e-11	1.21675e-09
ENSG00000164442	41078.5	0.434767	0.0647453	6.71504	1.88015e-11	1.29087e-09
ENSG00000167642	343.859	-0.657204	0.0979669	-6.70844	1.96721e-11	1.34553e-09
ENSG00000241749	107.863	0.968398	0.144436	6.7047	2.01824e-11	1.37522e-09
ENSG00000074842	4454.59	0.404634	0.0604974	6.68845	2.2555e-11	1.53111e-09
ENSG00000088756	2100.36	-0.422192	0.0633076	-6.6689	2.57722e-11	1.74296e-09
ENSG00000183671	1015.09	0.463181	0.0695764	6.65717	2.79158e-11	1.87389e-09
ENSG00000107104	5753.09	-0.458062	0.0688021	-6.65768	2.78192e-11	1.87389e-09
ENSG00000149968	1802.81	0.780309	0.117238	6.65574	2.8188e-11	1.88515e-09
ENSG00000164125	4645.1	-0.470243	0.0707004	-6.65121	2.90684e-11	1.93686e-09
ENSG00000121898	4599.82	0.351153	0.0528343	6.6463	3.00547e-11	1.99521e-09
ENSG00000179954	1026.52	0.599393	0.090214	6.64413	3.05023e-11	2.01751e-09
ENSG00000136040	1809.39	-0.474573	0.071441	-6.64286	3.07655e-11	2.02749e-09
ENSG00000058668	56388.8	-0.296829	0.0447047	-6.63978	3.14157e-11	2.06281e-09
ENSG00000107796	4995.44	-0.5781	0.0873024	-6.62182	3.54812e-11	2.32132e-09
ENSG00000138347	959.008	0.679408	0.103124	6.58826	4.45006e-11	2.90089e-09
ENSG00000196230	38324.4	0.274235	0.0416399	6.58587	4.52236e-11	2.93742e-09
ENSG00000107099	663.633	-0.444679	0.0676486	-6.57336	4.9193e-11	3.18379e-09
ENSG00000159403	25358.5	-0.352716	0.0537528	-6.56181	5.31579e-11	3.42812e-09
ENSG00000189001	124.4	0.854403	0.130361	6.5541	5.59768e-11	3.59706e-09
ENSG00000204442	50.11	0.995151	0.151905	6.55115	5.70959e-11	3.65596e-09
ENSG00000075223	14791	0.689212	0.105442	6.53642	6.30106e-11	4.02043e-09
ENSG00000138759	7053.24	-0.540815	0.0828097	-6.53082	6.54101e-11	4.15884e-09
ENSG00000162631	94.0658	0.950627	0.146718	6.47929	9.21582e-11	5.79951e-09
ENSG00000118985	12740.9	0.413152	0.0637654	6.47925	9.2178e-11	5.79951e-09
ENSG00000136026	26158.3	0.286837	0.0442683	6.4795	9.20257e-11	5.79951e-09
ENSG00000180914	25933.1	0.39873	0.0617584	6.45629	1.073e-10	6.72751e-09
ENSG00000122966	433.383	0.555054	0.0860624	6.44944	1.12263e-10	7.01429e-09
ENSG00000101282	63.3451	0.955787	0.148547	6.43423	1.24103e-10	7.72732e-09
ENSG00000143870	17801.3	0.23923	0.0372102	6.42917	1.28304e-10	7.96145e-09
ENSG00000124788	3754.14	-0.365281	0.0568297	-6.42764	1.29597e-10	7.98682e-09
ENSG00000171189	47.42	-1.02662	0.159709	-6.42806	1.29245e-10	7.98682e-09
ENSG00000118515	6458.65	-0.45241	0.0704961	-6.41751	1.38517e-10	8.49629e-09
ENSG00000101160	12726.1	0.338538	0.0527548	6.4172	1.38805e-10	8.49629e-09
ENSG00000183691	161.394	0.910944	0.142028	6.41386	1.41885e-10	8.65547e-09
ENSG00000187764	302.113	-0.589792	0.0919936	-6.41123	1.44351e-10	8.77624e-09
ENSG00000114796	2046.91	-0.504015	0.0786245	-6.41041	1.4513e-10	8.79398e-09
ENSG00000158008	82.9586	0.912363	0.142555	6.40006	1.55311e-10	9.37946e-09
ENSG00000127589	3711.01	0.300451	0.0471064	6.37813	1.79258e-10	1.07895e-08
ENSG00000163840	2381.56	-0.37013	0.0580885	-6.37184	1.86777e-10	1.12047e-08
ENSG00000122877	143.165	0.910508	0.143138	6.36106	2.00371e-10	1.19805e-08
ENSG00000164176	98.4044	-0.864025	0.135855	-6.35989	2.01903e-10	1.20322e-08
ENSG00000128342	719.217	0.691689	0.108894	6.35197	2.12571e-10	1.26263e-08
ENSG00000114948	326.291	0.534497	0.0841638	6.35067	2.14373e-10	1.26916e-08
ENSG00000139318	1306.72	0.492503	0.0775675	6.34934	2.16234e-10	1.27599e-08
ENSG00000197894	10189	-0.287869	0.045347	-6.34813	2.17953e-10	1.28195e-08
ENSG00000137310	435.765	0.5902	0.0931546	6.33571	2.36258e-10	1.3851e-08
ENSG00000196611	779.557	0.761203	0.120193	6.33319	2.40145e-10	1.40333e-08
ENSG00000189221	51.5501	-0.983867	0.155583	-6.32374	2.55303e-10	1.4871e-08
ENSG00000154065	771.792	-0.416839	0.0659502	-6.32052	2.60688e-10	1.51358e-08
ENSG00000128510	5206.96	-0.38614	0.0612802	-6.30123	2.95299e-10	1.70905e-08
ENSG00000115648	505.977	0.625732	0.0993285	6.29963	2.98366e-10	1.72128e-08
ENSG00000080503	6225.74	-0.314579	0.050032	-6.28756	3.22493e-10	1.85454e-08
ENSG00000120738	3482.86	0.594241	0.0945398	6.28562	3.26551e-10	1.87192e-08
ENSG00000011454	3663.6	-0.283276	0.0450957	-6.28167	3.34955e-10	1.91402e-08
ENSG00000117399	475.702	0.524336	0.0835322	6.27706	3.45041e-10	1.96543e-08
ENSG00000198873	1585.95	-0.387743	0.0618921	-6.26483	3.73238e-10	2.11936e-08
ENSG00000148704	36.5099	1.00735	0.160939	6.2592	3.86951e-10	2.19034e-08
ENSG00000083067	172.121	-0.878777	0.140423	-6.25806	3.89786e-10	2.19949e-08
ENSG00000124134	83.4657	0.907725	0.145129	6.25462	3.98488e-10	2.24159e-08
ENSG00000038427	401.994	-0.534367	0.0855389	-6.24706	4.18252e-10	2.34546e-08
ENSG00000183963	1265.04	0.648457	0.103827	6.24552	4.22381e-10	2.36128e-08
ENSG00000120833	1328.85	-0.514911	0.0825637	-6.23653	4.47394e-10	2.49339e-08
ENSG00000112078	15279.1	-0.368653	0.059177	-6.22966	4.67459e-10	2.5972e-08
ENSG00000117266	427.554	0.595185	0.0955523	6.22889	4.69747e-10	2.60191e-08
ENSG00000071539	305.369	0.588762	0.0945982	6.22382	4.85201e-10	2.67929e-08
ENSG00000170891	26.1687	-1.0017	0.161033	-6.22047	4.95653e-10	2.72866e-08
ENSG00000135931	4084.08	-0.391459	0.0629432	-6.21924	4.99579e-10	2.74191e-08
ENSG00000276547	1878.99	-0.475076	0.0764308	-6.21576	5.10773e-10	2.78642e-08
ENSG00000120837	3713.19	-0.486258	0.0782246	-6.21618	5.09393e-10	2.78642e-08
ENSG00000237649	329.873	0.685874	0.110592	6.20185	5.5804e-10	3.0351e-08
ENSG00000173083	329.475	-0.531169	0.08571	-6.19729	5.74449e-10	3.11497e-08
ENSG00000189362	378.6	-0.58742	0.0948978	-6.19003	6.01528e-10	3.25203e-08
ENSG00000235162	9520.12	0.368805	0.0596999	6.17764	6.5065e-10	3.5071e-08
ENSG00000140511	583.911	-0.779905	0.126312	-6.17443	6.64046e-10	3.56866e-08
ENSG00000170558	24242.8	0.318357	0.0516083	6.1687	6.88524e-10	3.68922e-08
ENSG00000175538	88.3443	-0.878427	0.14251	-6.16396	7.09498e-10	3.79036e-08
ENSG00000081320	2276.88	-0.545515	0.0885374	-6.16141	7.20992e-10	3.8404e-08
ENSG00000169851	291.348	0.575797	0.0934953	6.15856	7.34081e-10	3.89862e-08
ENSG00000081052	768.728	-0.521337	0.0846735	-6.15703	7.41198e-10	3.92487e-08
ENSG00000226380	145.414	0.774307	0.125799	6.1551	7.50284e-10	3.96137e-08
ENSG00000099994	162.058	-0.830442	0.134956	-6.15342	7.58307e-10	3.99205e-08
ENSG00000179256	78.0659	-0.921105	0.149759	-6.1506	7.71914e-10	4.05187e-08
ENSG00000116741	381.898	-0.860002	0.140017	-6.14214	8.14147e-10	4.26118e-08
ENSG00000137936	1377.12	0.435165	0.0708648	6.14078	8.21156e-10	4.28544e-08
ENSG00000138496	1415.91	-0.410658	0.0669758	-6.13143	8.70917e-10	4.53203e-08
ENSG00000173918	1081.21	0.554989	0.0905442	6.12948	8.81674e-10	4.57482e-08
ENSG00000184347	7117.3	-0.562453	0.0917915	-6.12751	8.92638e-10	4.61844e-08
ENSG00000187210	4760.97	0.405273	0.0662791	6.11464	9.67775e-10	4.99289e-08
ENSG00000239887	185.581	-0.812843	0.132961	-6.11339	9.75365e-10	5.01771e-08
ENSG00000100297	708.724	0.616237	0.100986	6.10218	1.04634e-09	5.36753e-08
ENSG00000165092	167433	-0.361559	0.0592867	-6.09848	1.07084e-09	5.47765e-08
ENSG00000152049	426.775	0.661266	0.108485	6.09543	1.09144e-09	5.56726e-08
ENSG00000106511	36.5304	-0.982898	0.161309	-6.09325	1.10639e-09	5.62764e-08
ENSG00000048707	3987.07	-0.369009	0.0605696	-6.09231	1.11294e-09	5.64507e-08
ENSG00000102409	1415.99	-0.352433	0.057862	-6.09092	1.12266e-09	5.6784e-08
ENSG00000157110	4538.75	-0.333604	0.0548129	-6.08623	1.15597e-09	5.81429e-08
ENSG00000205426	147.744	0.7729	0.126984	6.08661	1.15329e-09	5.81429e-08
ENSG00000263535	426.751	0.526776	0.0865872	6.08376	1.17395e-09	5.88835e-08
ENSG00000009413	8050.82	-0.590226	0.0970735	-6.0802	1.20033e-09	6.004e-08
ENSG00000144136	2697.29	0.320642	0.0527744	6.07572	1.23432e-09	6.15693e-08
ENSG00000068831	75.1715	-0.903982	0.148908	-6.07074	1.27325e-09	6.33362e-08
ENSG00000161638	21788.9	0.315418	0.0520012	6.06559	1.31474e-09	6.52205e-08
ENSG00000125355	110.77	-0.830743	0.13703	-6.06248	1.34039e-09	6.63109e-08
ENSG00000137309	4348.97	0.479747	0.0792069	6.05689	1.38775e-09	6.84663e-08
ENSG00000074800	68208.4	0.306214	0.0505663	6.05571	1.39804e-09	6.87858e-08
ENSG00000170577	89.5901	-0.963529	0.159182	-6.05299	1.42186e-09	6.97677e-08
ENSG00000181751	886.312	0.465784	0.0769663	6.05179	1.43244e-09	7.00964e-08
ENSG00000120217	223.453	0.720384	0.119221	6.04242	1.51819e-09	7.40916e-08
ENSG00000140937	21396.6	-0.254878	0.0422423	-6.0337	1.60245e-09	7.79929e-08
ENSG00000276043	457.678	0.60849	0.100919	6.02948	1.64485e-09	7.98418e-08
ENSG00000170485	1477.07	0.424513	0.0705175	6.01997	1.74454e-09	8.44534e-08
ENSG00000121578	2672.3	0.364359	0.0606927	6.00334	1.93297e-09	9.33253e-08
ENSG00000169271	354.815	-0.633971	0.105768	-5.994	2.04744e-09	9.85883e-08
ENSG00000140391	8529.89	-0.253672	0.0423461	-5.99045	2.09263e-09	1.00496e-07
ENSG00000247095	985.303	0.542152	0.0906877	5.97823	2.25573e-09	1.08042e-07
ENSG00000114268	916.323	0.66129	0.110651	5.97634	2.2821e-09	1.09016e-07
ENSG00000182326	24864.5	-0.321614	0.0538577	-5.97156	2.34993e-09	1.1196e-07
ENSG00000079257	1718.61	-0.502578	0.0842311	-5.96665	2.42167e-09	1.15074e-07
ENSG00000076716	420.706	-0.480836	0.0806415	-5.96264	2.48202e-09	1.17632e-07
ENSG00000153029	1984.01	-0.385639	0.064706	-5.95987	2.52436e-09	1.19326e-07
ENSG00000182240	5655.87	0.242621	0.0407174	5.95867	2.54299e-09	1.19892e-07
ENSG00000104738	1430.34	0.407714	0.0685109	5.95109	2.66368e-09	1.25256e-07
ENSG00000120549	1355.76	0.342683	0.0576515	5.94403	2.78095e-09	1.3043e-07
ENSG00000115594	7806.21	-0.468879	0.0789062	-5.94224	2.8116e-09	1.31526e-07
ENSG00000131153	155.527	0.706549	0.119111	5.93184	2.99555e-09	1.39769e-07
ENSG00000196428	1779.99	0.337593	0.0569517	5.9277	3.07199e-09	1.42966e-07
ENSG00000082438	5842.8	-0.322003	0.0543607	-5.92345	3.15254e-09	1.46338e-07
ENSG00000143416	1110.85	-0.426829	0.0720768	-5.92187	3.18305e-09	1.46998e-07
ENSG00000150510	63.2793	-0.875148	0.147778	-5.92206	3.17925e-09	1.46998e-07
ENSG00000145147	10762.3	0.358476	0.0606379	5.91175	3.38491e-09	1.55922e-07
ENSG00000111371	16198	-0.309024	0.0522819	-5.91072	3.40612e-09	1.56499e-07
ENSG00000163431	3437.82	-0.393946	0.0666993	-5.9063	3.49879e-09	1.60349e-07
ENSG00000196227	824.959	-0.380257	0.0644079	-5.90389	3.55032e-09	1.62299e-07
ENSG00000107186	3214.91	-0.308599	0.052322	-5.89808	3.67756e-09	1.67691e-07
ENSG00000203685	29.8664	-0.95105	0.161326	-5.89522	3.74183e-09	1.70192e-07
ENSG00000198796	5861.04	-0.271963	0.046145	-5.89367	3.777e-09	1.7136e-07
ENSG00000173530	3482.34	0.272803	0.0463948	5.88002	4.10217e-09	1.85646e-07
ENSG00000089472	792.965	0.398474	0.0679153	5.86721	4.43185e-09	2.00065e-07
ENSG00000116574	427.045	-0.777266	0.132516	-5.86547	4.47875e-09	2.01678e-07
ENSG00000011422	2129.94	0.405842	0.0692126	5.8637	4.52667e-09	2.03329e-07
ENSG00000133466	691.949	-0.411854	0.0702462	-5.86301	4.54552e-09	2.03668e-07
ENSG00000170525	3165.33	0.301986	0.0515823	5.85446	4.78576e-09	2.13902e-07
ENSG00000144749	1129.25	0.383651	0.0655572	5.85215	4.8527e-09	2.16358e-07
ENSG00000268894	56.9908	-0.882448	0.15082	-5.851	4.88614e-09	2.17313e-07
ENSG00000123131	5116.64	0.280911	0.0480163	5.85034	4.9058e-09	2.17651e-07
ENSG00000185630	8837.8	-0.386679	0.0662185	-5.83945	5.23746e-09	2.31796e-07
ENSG00000075651	1006.23	-0.493934	0.0846244	-5.83678	5.32207e-09	2.34965e-07
ENSG00000198947	88.3544	-0.868309	0.148907	-5.83123	5.50189e-09	2.42311e-07
ENSG00000123243	7361.49	-0.412797	0.070819	-5.8289	5.57942e-09	2.45128e-07
ENSG00000170989	218.721	0.716288	0.123014	5.82281	5.78661e-09	2.53614e-07
ENSG00000123416	4637.94	0.41076	0.0705954	5.8185	5.93775e-09	2.59608e-07
ENSG00000133083	524.253	-0.522262	0.0897843	-5.81685	5.99655e-09	2.61545e-07
ENSG00000123388	92.161	-0.873052	0.150333	-5.80746	6.34286e-09	2.75983e-07
ENSG00000144730	963.148	-0.520232	0.0896006	-5.80612	6.39373e-09	2.77528e-07
ENSG00000196730	3146.69	-0.430472	0.0741625	-5.80444	6.45803e-09	2.79647e-07
ENSG00000171992	3820.56	0.305351	0.0526494	5.79971	6.64302e-09	2.86969e-07
ENSG00000203727	2573.27	-0.353002	0.0609689	-5.78986	7.0445e-09	3.03586e-07
ENSG00000109819	149.338	-0.828999	0.143372	-5.78217	7.3743e-09	3.17042e-07
ENSG00000227295	1238.28	0.457083	0.0790989	5.77863	7.5313e-09	3.23023e-07
ENSG00000164932	361.214	0.505321	0.0875699	5.77049	7.90412e-09	3.3821e-07
ENSG00000080709	361.574	0.541585	0.0938704	5.76949	7.95112e-09	3.39417e-07
ENSG00000198624	196.258	-0.644026	0.111676	-5.76694	8.07251e-09	3.43786e-07
ENSG00000151388	7798.05	-0.262859	0.045607	-5.76357	8.23551e-09	3.49903e-07
ENSG00000166508	1681.48	0.38466	0.0667743	5.7606	8.3815e-09	3.55269e-07
ENSG00000111907	1000.78	-0.499342	0.0869849	-5.74056	9.43628e-09	3.99042e-07
ENSG00000156265	369.277	0.575796	0.100376	5.73637	9.67285e-09	4.0809e-07
ENSG00000172594	673.61	-0.59553	0.103892	-5.73221	9.91322e-09	4.17257e-07
ENSG00000143549	12069.9	0.248844	0.0434598	5.72585	1.02916e-08	4.30173e-07
ENSG00000061918	152.805	-0.807044	0.140931	-5.72651	1.02518e-08	4.30173e-07
ENSG00000181104	2690.42	0.360443	0.0629487	5.72598	1.02838e-08	4.30173e-07
ENSG00000079931	878.364	0.463882	0.0811318	5.71764	1.08016e-08	4.50449e-07
ENSG00000124343	19.1852	0.902743	0.158517	5.69491	1.23434e-08	5.13559e-07
ENSG00000113594	1407.07	-0.441108	0.0775924	-5.68494	1.30856e-08	5.43188e-07
ENSG00000171385	1235.23	-0.367438	0.0647115	-5.6781	1.36202e-08	5.64083e-07
ENSG00000111057	2151.3	-0.556396	0.0980018	-5.6774	1.36754e-08	5.65073e-07
ENSG00000115252	79.6774	-0.831697	0.146651	-5.67125	1.41756e-08	5.84403e-07
ENSG00000136169	748.885	-0.392079	0.0691664	-5.66863	1.43945e-08	5.92078e-07
ENSG00000165244	160.606	0.708823	0.125112	5.66551	1.46584e-08	6.01562e-07
ENSG00000164418	935.016	-0.398355	0.0703554	-5.66203	1.4959e-08	6.12506e-07
ENSG00000148798	351.041	-0.556237	0.09833	-5.65683	1.5419e-08	6.29912e-07
ENSG00000134668	1225.15	0.54749	0.0969484	5.64723	1.63054e-08	6.64622e-07
ENSG00000144802	848.119	0.46728	0.0827574	5.64638	1.63864e-08	6.66419e-07
ENSG00000197747	6279.13	0.404884	0.0717263	5.64485	1.65322e-08	6.70836e-07
ENSG00000158470	3888.42	-0.278248	0.0492958	-5.64446	1.657e-08	6.70863e-07
ENSG00000138180	559.293	0.552667	0.0979558	5.64201	1.68081e-08	6.7898e-07
ENSG00000053328	38.6462	-0.891469	0.158024	-5.64136	1.68714e-08	6.80015e-07
ENSG00000102265	31658.7	0.434784	0.0770764	5.64095	1.69118e-08	6.80125e-07
ENSG00000147100	7985.41	0.286949	0.0508994	5.63756	1.72476e-08	6.9209e-07
ENSG00000153064	46.7886	0.874685	0.155384	5.62919	1.81061e-08	7.24927e-07
ENSG00000051341	142.069	0.66568	0.1185	5.61757	1.93666e-08	7.73677e-07
ENSG00000101194	982.962	0.577575	0.10289	5.6135	1.98273e-08	7.90335e-07
ENSG00000171345	10868.8	0.668389	0.119204	5.60708	2.05766e-08	8.18396e-07
ENSG00000083290	1975.66	-0.334768	0.0597446	-5.60331	2.10295e-08	8.3457e-07
ENSG00000159640	271.391	0.551487	0.0984461	5.60192	2.11991e-08	8.39457e-07
ENSG00000150687	10576.6	0.430877	0.0769267	5.60113	2.12954e-08	8.41425e-07
ENSG00000165895	201.738	-0.56952	0.101832	-5.59273	2.23522e-08	8.79331e-07
ENSG00000186832	34.9189	0.900608	0.161028	5.59286	2.23364e-08	8.79331e-07
ENSG00000144583	1271.11	0.442861	0.0793028	5.58443	2.34463e-08	9.20369e-07
ENSG00000104763	4678.87	-0.29419	0.052764	-5.57557	2.46719e-08	9.6638e-07
ENSG00000028277	270.228	0.666588	0.11976	5.56604	2.6059e-08	1.0185e-06
ENSG00000173114	53.9406	0.834221	0.150168	5.55526	2.77193e-08	1.08105e-06
ENSG00000134775	3400.41	-0.319968	0.0576086	-5.55417	2.78939e-08	1.08552e-06
ENSG00000117592	24097.6	0.265626	0.0479063	5.5447	2.94462e-08	1.14346e-06
ENSG00000182158	6040.57	0.281593	0.0508013	5.54302	2.97295e-08	1.15199e-06
ENSG00000183049	362.698	0.478671	0.0863962	5.54041	3.01757e-08	1.16677e-06
ENSG00000175550	2569.24	0.403331	0.0729245	5.5308	3.18777e-08	1.22995e-06
ENSG00000136869	1278.36	-0.37462	0.0677504	-5.52941	3.21305e-08	1.23706e-06
ENSG00000180818	107.414	-0.796225	0.144036	-5.52797	3.23959e-08	1.24462e-06
ENSG00000022556	10.0732	0.773658	0.14014	5.52062	3.37806e-08	1.29507e-06
ENSG00000180263	739.187	-0.368288	0.066737	-5.5185	3.41903e-08	1.308e-06
ENSG00000176697	3400.94	-0.314413	0.0569817	-5.51778	3.43311e-08	1.31061e-06
ENSG00000163629	10143.9	-0.343503	0.0623262	-5.51137	3.56047e-08	1.3535e-06
ENSG00000166557	4639.18	0.278212	0.0504767	5.51169	3.55403e-08	1.3535e-06
ENSG00000214110	4682.97	0.322689	0.0585698	5.50948	3.59887e-08	1.36523e-06
ENSG00000025772	1548.61	0.294621	0.0534921	5.50774	3.63466e-08	1.37591e-06
ENSG00000119514	281.351	-0.514566	0.093538	-5.50114	3.77344e-08	1.42546e-06
ENSG00000042062	107.512	-0.841768	0.153162	-5.49592	3.88674e-08	1.4652e-06
ENSG00000186866	3617.92	0.239898	0.0436548	5.49534	3.89967e-08	1.46701e-06
ENSG00000132359	811.285	0.517213	0.0941431	5.49391	3.93136e-08	1.47585e-06
ENSG00000105486	278.083	0.559078	0.101801	5.49189	3.97656e-08	1.48972e-06
ENSG00000104812	5337.03	0.365434	0.0665739	5.48914	4.03889e-08	1.50994e-06
ENSG00000144681	2956.71	-0.264399	0.0481717	-5.48868	4.04947e-08	1.51077e-06
ENSG00000204518	21.7827	-0.872554	0.159124	-5.48348	4.17048e-08	1.55271e-06
ENSG00000094963	30.0593	-0.879235	0.160419	-5.48086	4.23275e-08	1.57265e-06
ENSG00000137331	852.379	0.545861	0.100028	5.45706	4.84074e-08	1.79485e-06
ENSG00000145287	155.173	0.644489	0.118131	5.45573	4.87709e-08	1.80462e-06
ENSG00000013810	688.276	0.504212	0.0924354	5.45475	4.90414e-08	1.81092e-06
ENSG00000198431	51284.4	-0.279662	0.0513267	-5.44867	5.07485e-08	1.87013e-06
ENSG00000226415	13804.2	0.296037	0.0543645	5.44541	5.16868e-08	1.90083e-06
ENSG00000120278	141.66	-0.700901	0.128811	-5.44133	5.28845e-08	1.94093e-06
ENSG00000129757	289.7	-0.582671	0.10719	-5.43586	5.45338e-08	1.99335e-06
ENSG00000005884	7167.25	0.515488	0.0948292	5.43596	5.45029e-08	1.99335e-06
ENSG00000046604	170.998	0.635462	0.117112	5.4261	5.7598e-08	2.10111e-06
ENSG00000203760	139.91	0.632431	0.1167	5.4193	5.98343e-08	2.17828e-06
ENSG00000073910	3624.61	-0.338633	0.0625597	-5.41296	6.19914e-08	2.25227e-06
ENSG00000111275	1709.52	-0.340005	0.0628628	-5.40868	6.34897e-08	2.30207e-06
ENSG00000152952	17131.8	0.55743	0.103139	5.40463	6.4944e-08	2.34539e-06
ENSG00000184838	550.043	0.520977	0.0963934	5.40469	6.4919e-08	2.34539e-06
ENSG00000106538	1066.88	-0.555378	0.102832	-5.40085	6.63272e-08	2.39056e-06
ENSG00000116183	604.544	0.630901	0.116837	5.39984	6.66992e-08	2.39918e-06
ENSG00000154734	38487	0.254359	0.0471114	5.39909	6.69799e-08	2.40448e-06
ENSG00000158125	100.51	0.673091	0.12469	5.39812	6.73438e-08	2.41275e-06
ENSG00000162687	72.8451	0.761243	0.141147	5.39326	6.91918e-08	2.47405e-06
ENSG00000256663	313.083	0.555441	0.103041	5.39047	7.02746e-08	2.5078e-06
ENSG00000127863	621.967	-0.456874	0.084851	-5.38443	7.26749e-08	2.58835e-06
ENSG00000139178	3045.11	-0.263564	0.0489527	-5.38406	7.28253e-08	2.5886e-06
ENSG00000197415	346.533	0.653603	0.121569	5.37637	7.60009e-08	2.69617e-06
ENSG00000139263	1480.44	-0.4418	0.0821889	-5.37542	7.64055e-08	2.7052e-06
ENSG00000013016	2639.9	0.349794	0.0650881	5.37416	7.6941e-08	2.71883e-06
ENSG00000166912	2232.61	-0.267494	0.0498041	-5.37093	7.83327e-08	2.7626e-06
ENSG00000151952	77.9633	-0.852099	0.158669	-5.37028	7.86139e-08	2.76712e-06
ENSG00000111276	2215.2	-0.250937	0.046733	-5.36958	7.89194e-08	2.77247e-06
ENSG00000127824	336.578	0.606088	0.11291	5.36786	7.96772e-08	2.79365e-06
ENSG00000102144	38703.6	0.297081	0.0553601	5.36634	8.03496e-08	2.81177e-06
ENSG00000181072	149.217	-0.652187	0.12165	-5.36117	8.26828e-08	2.88782e-06
ENSG00000080823	430.258	0.468086	0.0876327	5.34145	9.22046e-08	3.21417e-06
ENSG00000183160	6126.01	-0.409541	0.0768377	-5.32996	9.82371e-08	3.41786e-06
ENSG00000116717	2202.98	0.369152	0.0693571	5.32249	1.02357e-07	3.55436e-06
ENSG00000100439	3965.89	-0.362258	0.0680808	-5.32101	1.03194e-07	3.57652e-06
ENSG00000164611	307.194	0.505699	0.0950965	5.31774	1.05064e-07	3.63437e-06
ENSG00000076382	388.668	0.532415	0.100245	5.31114	1.08944e-07	3.76138e-06
ENSG00000178222	80.972	0.800448	0.150725	5.31064	1.09242e-07	3.76447e-06
ENSG00000026025	41440.4	0.338604	0.063765	5.31019	1.09508e-07	3.76594e-06
ENSG00000175063	235.369	0.667381	0.125687	5.30987	1.09702e-07	3.76594e-06
ENSG00000272341	226.163	-0.661482	0.124624	-5.30784	1.10935e-07	3.80104e-06
ENSG00000085063	20047.3	0.261884	0.0494013	5.30116	1.15072e-07	3.93533e-06
ENSG00000185008	1145.6	0.406373	0.0766842	5.2993	1.16245e-07	3.96793e-06
ENSG00000141574	1425.5	-0.672375	0.126976	-5.29527	1.18838e-07	4.0488e-06
ENSG00000185015	91.2927	-0.682142	0.128903	-5.29192	1.2104e-07	4.11605e-06
ENSG00000121297	1086.74	0.326463	0.0617178	5.2896	1.22583e-07	4.16067e-06
ENSG00000105220	11071.4	0.26842	0.0507504	5.28903	1.22968e-07	4.16593e-06
ENSG00000171241	405.965	0.511646	0.0967633	5.2876	1.23932e-07	4.19071e-06
ENSG00000242600	166.661	-0.634291	0.120011	-5.28529	1.25508e-07	4.23608e-06
ENSG00000132470	439.895	-0.659178	0.124769	-5.28319	1.26955e-07	4.27691e-06
ENSG00000106123	2179.71	-0.559993	0.106025	-5.28172	1.27977e-07	4.30331e-06
ENSG00000013297	490.342	0.594305	0.112566	5.27961	1.29457e-07	4.33693e-06
ENSG00000149380	327.725	0.479182	0.0907555	5.27992	1.29238e-07	4.33693e-06
ENSG00000154678	4995.74	-0.383725	0.0726854	-5.27925	1.29711e-07	4.33738e-06
ENSG00000071282	8307.49	-0.365311	0.0692386	-5.27612	1.31946e-07	4.40398e-06
ENSG00000005249	391.087	-0.569757	0.108147	-5.26837	1.37642e-07	4.58562e-06
ENSG00000138379	68.4022	-0.776476	0.147638	-5.25931	1.446e-07	4.80856e-06
ENSG00000065534	38949.1	-0.256431	0.0488064	-5.25404	1.48798e-07	4.93904e-06
ENSG00000127329	204.313	0.586068	0.111705	5.24656	1.54966e-07	5.13433e-06
ENSG00000246985	176.717	-0.595654	0.113663	-5.24053	1.60116e-07	5.29528e-06
ENSG00000154930	609.524	-0.505701	0.096612	-5.23435	1.65565e-07	5.46547e-06
ENSG00000092068	324.736	-0.527278	0.100773	-5.23235	1.67366e-07	5.51484e-06
ENSG00000164116	29.3291	-0.842964	0.161138	-5.23132	1.68305e-07	5.5256e-06
ENSG00000094804	361.308	0.586607	0.112131	5.23144	1.68193e-07	5.5256e-06
ENSG00000111669	22172.2	0.267415	0.0511267	5.23044	1.69109e-07	5.54193e-06
ENSG00000137872	296.169	-0.524471	0.100319	-5.22804	1.71319e-07	5.60417e-06
ENSG00000115339	430.828	0.522779	0.100045	5.22543	1.73755e-07	5.67357e-06
ENSG00000128487	1056.04	-0.395765	0.0758583	-5.21716	1.81692e-07	5.92204e-06
ENSG00000146021	336.108	-0.541042	0.103715	-5.21663	1.8221e-07	5.92823e-06
ENSG00000221955	482.389	-0.410858	0.0788105	-5.21324	1.85572e-07	6.02675e-06
ENSG00000125148	2282.7	0.637953	0.122503	5.20767	1.91226e-07	6.1946e-06
ENSG00000167695	1457.63	0.368806	0.0708225	5.20748	1.91426e-07	6.1946e-06
ENSG00000135919	27092.5	0.46768	0.0898646	5.20427	1.94756e-07	6.27984e-06
ENSG00000134013	96405.1	0.369049	0.0709085	5.20459	1.94429e-07	6.27984e-06
ENSG00000185624	49655.9	0.319909	0.0614947	5.20222	1.96919e-07	6.33827e-06
ENSG00000011426	1781.66	0.512315	0.0985577	5.19813	2.01308e-07	6.46802e-06
ENSG00000110880	21420.2	0.231014	0.0444637	5.19557	2.04091e-07	6.54577e-06
ENSG00000109436	2094.23	-0.259019	0.0499161	-5.18908	2.1133e-07	6.76594e-06
ENSG00000150540	1423.82	-0.498704	0.0961228	-5.18819	2.12346e-07	6.77444e-06
ENSG00000182636	2195.99	0.337691	0.0650845	5.1885	2.11993e-07	6.77444e-06
ENSG00000148842	425.814	-0.45356	0.0874427	-5.18694	2.13772e-07	6.80165e-06
ENSG00000174437	34703.7	-0.271406	0.0523263	-5.18679	2.13952e-07	6.80165e-06
ENSG00000131738	127.684	0.626739	0.120895	5.18415	2.17006e-07	6.88662e-06
ENSG00000077092	1236.55	-0.393102	0.0758884	-5.18	2.2188e-07	7.02894e-06
ENSG00000183087	17510.4	0.536036	0.103589	5.17463	2.28361e-07	7.22157e-06
ENSG00000170271	890.118	-0.437059	0.0844866	-5.17312	2.30218e-07	7.26757e-06
ENSG00000100003	464.631	0.434129	0.0839814	5.16935	2.3491e-07	7.40274e-06
ENSG00000023171	415.944	0.433818	0.0839622	5.16682	2.38105e-07	7.49035e-06
ENSG00000160712	781.144	-0.340665	0.0659632	-5.16447	2.4112e-07	7.57202e-06
ENSG00000188613	229.903	-0.590947	0.114443	-5.16366	2.42167e-07	7.59168e-06
ENSG00000165891	111.168	0.67266	0.130437	5.15695	2.51e-07	7.85495e-06
ENSG00000144355	13.833	-0.795716	0.154342	-5.15552	2.52924e-07	7.90148e-06
ENSG00000135903	498.078	-0.381665	0.0740773	-5.15225	2.5738e-07	8.02678e-06
ENSG00000183856	515.961	0.504	0.0978626	5.15008	2.60378e-07	8.10628e-06
ENSG00000104369	31.7505	0.830056	0.161332	5.14502	2.67498e-07	8.31361e-06
ENSG00000162105	679.188	-0.431537	0.0839652	-5.13948	2.75507e-07	8.54782e-06
ENSG00000172548	123.682	-0.642993	0.125197	-5.13587	2.80849e-07	8.6986e-06
ENSG00000024526	242.64	0.617588	0.120407	5.12916	2.91034e-07	8.99862e-06
ENSG00000169184	541.944	-0.538814	0.1051	-5.12665	2.94937e-07	9.10371e-06
ENSG00000087586	481.891	0.539892	0.105445	5.12011	3.05355e-07	9.4092e-06
ENSG00000134324	1975.99	-0.298958	0.0584157	-5.11776	3.09181e-07	9.51088e-06
ENSG00000156508	68370.3	-0.211025	0.0413583	-5.10236	3.3544e-07	1.03011e-05
ENSG00000067082	4310.87	0.343947	0.0674826	5.09682	3.45408e-07	1.05892e-05
ENSG00000111801	410.289	-0.483505	0.0949018	-5.09479	3.49128e-07	1.06851e-05
ENSG00000146966	542.624	0.437441	0.085918	5.09138	3.55473e-07	1.08609e-05
ENSG00000147394	512.247	-0.477923	0.0940291	-5.08271	3.72091e-07	1.13494e-05
ENSG00000007171	19.2106	0.809782	0.159472	5.07789	3.8165e-07	1.16213e-05
ENSG00000087303	8786.28	-0.455611	0.0898302	-5.07191	3.93838e-07	1.19723e-05
ENSG00000154127	2489.49	0.371864	0.0733897	5.06698	4.04174e-07	1.22658e-05
ENSG00000118194	61.1546	-0.759161	0.149866	-5.0656	4.07106e-07	1.23341e-05
ENSG00000132646	2061.99	0.31868	0.0630586	5.05372	4.33298e-07	1.31056e-05
ENSG00000067057	5577.69	0.499732	0.0990119	5.04719	4.48353e-07	1.35383e-05
ENSG00000106688	994.752	0.404496	0.0802398	5.04109	4.62881e-07	1.39537e-05
ENSG00000107249	1621.46	-0.292416	0.0580341	-5.0387	4.68715e-07	1.4106e-05
ENSG00000117600	4443.48	0.460997	0.091527	5.03673	4.73549e-07	1.42278e-05
ENSG00000189060	3058.04	-0.26934	0.0534951	-5.03485	4.78212e-07	1.4344e-05
ENSG00000151348	11150.1	0.204031	0.0405503	5.03154	4.8656e-07	1.45702e-05
ENSG00000070961	7449.83	0.438897	0.0873761	5.02308	5.08489e-07	1.52016e-05
ENSG00000138413	5815.33	-0.337916	0.0672933	-5.02154	5.12576e-07	1.52985e-05
ENSG00000172403	9154.54	-0.314111	0.0626226	-5.01594	5.27747e-07	1.57253e-05
ENSG00000196639	1421.22	-0.444076	0.0886232	-5.01084	5.41938e-07	1.61215e-05
ENSG00000104687	2453.94	-0.286183	0.0571292	-5.00941	5.45983e-07	1.62152e-05
ENSG00000137563	597.92	0.523859	0.104647	5.00595	5.5588e-07	1.6482e-05
ENSG00000179314	186.371	0.576201	0.115139	5.0044	5.60364e-07	1.65877e-05
ENSG00000253276	4382.82	-0.29347	0.058665	-5.00247	5.66004e-07	1.67272e-05
ENSG00000093009	151.775	0.631719	0.126322	5.00088	5.70681e-07	1.68379e-05
ENSG00000116260	28793	0.385783	0.0771778	4.99862	5.77414e-07	1.70045e-05
ENSG00000204131	213.213	0.559	0.111837	4.99836	5.78211e-07	1.70045e-05
ENSG00000134690	314.26	0.51657	0.103357	4.99793	5.795e-07	1.70147e-05
ENSG00000072422	2505.58	-0.304582	0.0609585	-4.99654	5.83666e-07	1.71092e-05
ENSG00000134369	6383.02	0.254066	0.0508999	4.99147	5.99215e-07	1.75365e-05
ENSG00000158042	1807.25	0.27277	0.0546603	4.99028	6.0291e-07	1.76161e-05
ENSG00000256235	2088.78	0.236237	0.0473768	4.98635	6.15301e-07	1.79201e-05
ENSG00000141682	537.925	0.412899	0.0828017	4.9866	6.14506e-07	1.79201e-05
ENSG00000137502	2018.37	-0.403777	0.0810909	-4.97932	6.38091e-07	1.8554e-05
ENSG00000151693	1606.37	0.311814	0.0626639	4.97598	6.49184e-07	1.88462e-05
ENSG00000106714	41.9613	-0.7916	0.159118	-4.97491	6.52768e-07	1.89198e-05
ENSG00000163191	20549.2	0.190006	0.0382254	4.97066	6.67255e-07	1.93087e-05
ENSG00000198768	410.479	0.493886	0.0994731	4.96503	6.86916e-07	1.98458e-05
ENSG00000083444	32164.3	0.346664	0.0698356	4.96399	6.9059e-07	1.99201e-05
ENSG00000214193	663.566	0.443858	0.0894799	4.96042	7.03425e-07	2.0258e-05
ENSG00000176887	943.757	-0.418341	0.0843488	-4.95965	7.06187e-07	2.03051e-05
ENSG00000119969	181.289	0.585404	0.118155	4.95452	7.2509e-07	2.08155e-05
ENSG00000144401	443.802	-0.472568	0.0954118	-4.95292	7.31066e-07	2.09538e-05
ENSG00000144283	4980.92	-0.246476	0.0497723	-4.95208	7.34247e-07	2.10116e-05
ENSG00000132688	15319.9	0.253718	0.051326	4.94327	7.68229e-07	2.19492e-05
ENSG00000100842	385.053	0.590804	0.119569	4.94113	7.76712e-07	2.21565e-05
ENSG00000115652	2071.89	0.277338	0.0561479	4.93941	7.83585e-07	2.23173e-05
ENSG00000112096	10753.7	-0.363971	0.0736996	-4.93858	7.86931e-07	2.2326e-05
ENSG00000110042	1562.39	-0.283478	0.0573985	-4.93877	7.86167e-07	2.2326e-05
ENSG00000121075	630.217	0.445763	0.0902644	4.93842	7.87598e-07	2.2326e-05
ENSG00000007933	48.7727	-0.761702	0.154252	-4.93805	7.89093e-07	2.23333e-05
ENSG00000169604	16806.2	-0.279124	0.0566027	-4.93129	8.16882e-07	2.30836e-05
ENSG00000138835	1832.57	0.330345	0.0673237	4.90681	9.25692e-07	2.61175e-05
ENSG00000198901	985.262	0.447271	0.0912101	4.90374	9.40284e-07	2.64878e-05
ENSG00000134954	6394.69	0.241153	0.049223	4.8992	9.62301e-07	2.70658e-05
ENSG00000145604	2739.5	-0.25033	0.0511917	-4.89004	1.00816e-06	2.83115e-05
ENSG00000135775	1060.99	-0.306616	0.062711	-4.88935	1.01171e-06	2.8367e-05
ENSG00000114023	1562.67	0.341672	0.0698989	4.88809	1.01821e-06	2.85052e-05
ENSG00000138829	37728.5	-0.350727	0.0718242	-4.88314	1.0441e-06	2.91848e-05
ENSG00000107338	252.739	0.513378	0.105177	4.88108	1.05505e-06	2.94451e-05
ENSG00000276107	1011.88	0.363282	0.0745296	4.87432	1.09181e-06	3.04241e-05
ENSG00000099953	274.13	-0.593574	0.121842	-4.87166	1.10666e-06	3.07905e-05
ENSG00000165521	131.446	-0.633802	0.130164	-4.86924	1.12026e-06	3.11209e-05
ENSG00000122952	388.583	0.518877	0.106761	4.86019	1.17274e-06	3.24787e-05
ENSG00000087301	402.582	-0.428311	0.0881249	-4.86028	1.17222e-06	3.24787e-05
ENSG00000186185	156.827	0.599303	0.123353	4.85843	1.18318e-06	3.27176e-05
ENSG00000180353	213.297	-0.518374	0.106766	-4.85522	1.20252e-06	3.32017e-05
ENSG00000151090	788.992	-0.378839	0.0780385	-4.85451	1.20683e-06	3.32698e-05
ENSG00000117280	1517.53	-0.276476	0.0569627	-4.85363	1.21219e-06	3.33666e-05
ENSG00000101928	1967.45	-0.475094	0.097897	-4.853	1.21607e-06	3.34225e-05
ENSG00000170581	7506.58	-0.29175	0.0601814	-4.84785	1.24808e-06	3.42503e-05
ENSG00000158089	179.74	0.625912	0.129207	4.84427	1.27076e-06	3.48195e-05
ENSG00000135821	6347.34	-0.252159	0.0520938	-4.84047	1.29531e-06	3.54385e-05
ENSG00000110203	47.0775	0.763797	0.157825	4.83952	1.30156e-06	3.55557e-05
ENSG00000166482	6099.47	-0.35556	0.0735099	-4.8369	1.3188e-06	3.59722e-05
ENSG00000163347	186.458	0.648457	0.134147	4.83394	1.33854e-06	3.64556e-05
ENSG00000101825	13619.4	-0.351376	0.0727071	-4.83276	1.34654e-06	3.66182e-05
ENSG00000127526	2745.83	0.224628	0.0464846	4.83231	1.34955e-06	3.66448e-05
ENSG00000139971	263.524	0.471948	0.0977303	4.82908	1.37163e-06	3.71886e-05
ENSG00000090339	3726.17	-0.461296	0.0955308	-4.82877	1.37378e-06	3.7191e-05
ENSG00000005020	1178.44	-0.383457	0.0795352	-4.82122	1.42683e-06	3.85693e-05
ENSG00000148082	154.016	-0.589518	0.122296	-4.82042	1.43253e-06	3.86654e-05
ENSG00000104419	11771.8	0.212122	0.0440372	4.81689	1.45816e-06	3.92986e-05
ENSG00000127080	153.475	0.534577	0.11107	4.81299	1.48686e-06	4.00124e-05
ENSG00000166033	14202.5	-0.221921	0.0461158	-4.81227	1.49226e-06	4.00978e-05
ENSG00000099869	25.3612	-0.773919	0.160957	-4.80823	1.52275e-06	4.08563e-05
ENSG00000103175	745.073	-0.530042	0.110348	-4.80337	1.56016e-06	4.17979e-05
ENSG00000197457	805.495	0.452891	0.0943155	4.80187	1.5719e-06	4.205e-05
ENSG00000108854	5673.08	0.340113	0.0708547	4.80015	1.58546e-06	4.235e-05
ENSG00000164307	4961.57	-0.283613	0.0591039	-4.79854	1.59822e-06	4.2628e-05
ENSG00000167191	136.2	-0.683788	0.142522	-4.79777	1.60443e-06	4.27303e-05
ENSG00000013293	148.849	0.612706	0.127736	4.79668	1.61321e-06	4.29008e-05
ENSG00000038382	11445.2	0.208556	0.043497	4.79472	1.62903e-06	4.3258e-05
ENSG00000170571	209.784	0.490204	0.10227	4.79324	1.64108e-06	4.35139e-05
ENSG00000141404	81.1426	-0.682124	0.142382	-4.79081	1.66112e-06	4.39808e-05
ENSG00000145423	1126.28	-0.417582	0.087238	-4.78669	1.69551e-06	4.48254e-05
ENSG00000165480	164.641	0.553836	0.115757	4.78446	1.7145e-06	4.52612e-05
ENSG00000164236	1340.41	-0.334989	0.0700788	-4.78017	1.75143e-06	4.61688e-05
ENSG00000102755	8716.24	-0.326315	0.0683651	-4.77312	1.81398e-06	4.77478e-05
ENSG00000164684	71.2425	-0.738319	0.15514	-4.75905	1.94502e-06	5.11227e-05
ENSG00000119917	1270.34	-0.367299	0.0774293	-4.74367	2.09879e-06	5.50842e-05
ENSG00000146918	720.927	0.347952	0.0733837	4.74154	2.12095e-06	5.55307e-05
ENSG00000127564	86.5803	0.689691	0.14546	4.74145	2.12196e-06	5.55307e-05
ENSG00000154839	119.04	0.591013	0.124698	4.73956	2.14183e-06	5.59695e-05
ENSG00000117650	157.707	0.536069	0.113235	4.73413	2.19999e-06	5.74065e-05
ENSG00000131747	2315.47	0.436476	0.0922152	4.73323	2.20975e-06	5.75779e-05
ENSG00000021355	1389.23	-0.303477	0.064147	-4.73096	2.23455e-06	5.80854e-05
ENSG00000100031	89.994	0.710037	0.150086	4.73086	2.23566e-06	5.80854e-05
ENSG00000123496	55.9225	0.705626	0.14932	4.72558	2.29458e-06	5.95305e-05
ENSG00000173227	29.3934	-0.76155	0.1612	-4.72425	2.30968e-06	5.98363e-05
ENSG00000072786	2096.94	0.345101	0.073066	4.72315	2.32221e-06	6.00748e-05
ENSG00000068489	315.09	0.496684	0.105176	4.72239	2.33091e-06	6.02135e-05
ENSG00000142945	353.882	0.401388	0.0850118	4.72156	2.34039e-06	6.03721e-05
ENSG00000168779	1063.12	-0.333516	0.0707061	-4.71693	2.39427e-06	6.16738e-05
ENSG00000090376	1096.44	-0.352405	0.0747221	-4.71621	2.40281e-06	6.18057e-05
ENSG00000197956	44227.8	0.162021	0.0344034	4.70945	2.48384e-06	6.37991e-05
ENSG00000164850	284.307	0.441941	0.0939049	4.70626	2.52302e-06	6.47133e-05
ENSG00000197852	491.613	0.386153	0.0820897	4.70404	2.55066e-06	6.53295e-05
ENSG00000102854	30.8332	-0.72716	0.154673	-4.70128	2.58536e-06	6.61244e-05
ENSG00000119699	304.815	-0.423798	0.0902195	-4.69741	2.63482e-06	6.72941e-05
ENSG00000084674	85.9484	-0.656868	0.139917	-4.69471	2.66989e-06	6.80934e-05
ENSG00000145050	2267.86	0.278906	0.0594728	4.68964	2.73682e-06	6.97019e-05
ENSG00000157510	345.836	0.402226	0.0860189	4.67602	2.9249e-06	7.43843e-05
ENSG00000099337	2545.85	-0.362988	0.0776322	-4.67574	2.92891e-06	7.43843e-05
ENSG00000128284	256.217	-0.549585	0.117645	-4.67154	2.98949e-06	7.58163e-05
ENSG00000163864	83.9371	-0.678854	0.145362	-4.6701	3.0105e-06	7.6242e-05
ENSG00000026652	484.614	-0.379236	0.0812433	-4.6679	3.04289e-06	7.69543e-05
ENSG00000165029	2600.51	-0.293741	0.0629797	-4.66405	3.10046e-06	7.83007e-05
ENSG00000166886	2183.5	0.265109	0.0568554	4.66286	3.11845e-06	7.86451e-05
ENSG00000186297	78.768	0.693765	0.148812	4.66202	3.13115e-06	7.88551e-05
ENSG00000156970	334.713	0.45633	0.0981156	4.65094	3.3043e-06	8.31e-05
ENSG00000138685	17664.2	0.260399	0.056019	4.64841	3.34506e-06	8.39827e-05
ENSG00000133321	198.264	-0.524465	0.112832	-4.64818	3.3487e-06	8.39827e-05
ENSG00000142197	1654.35	0.294593	0.063506	4.63882	3.50412e-06	8.77586e-05
ENSG00000133216	1223.37	-0.34349	0.0740609	-4.63794	3.51897e-06	8.80084e-05
ENSG00000163815	76.4138	0.665875	0.14365	4.63542	3.56222e-06	8.89668e-05
ENSG00000137804	595.463	0.422649	0.0912659	4.63097	3.6396e-06	9.07738e-05
ENSG00000119922	951.521	-0.326774	0.0707901	-4.6161	3.91026e-06	9.73897e-05
ENSG00000231167	2149.59	0.221592	0.0480459	4.61208	3.98651e-06	9.90157e-05
ENSG00000198964	1394.17	-0.310255	0.0672667	-4.61232	3.98208e-06	9.90157e-05
ENSG00000078804	1621.62	-0.303322	0.0657766	-4.6114	3.99969e-06	9.92067e-05
ENSG00000006016	185.406	0.517281	0.112197	4.61048	4.01744e-06	9.95101e-05
ENSG00000075218	200.025	0.571145	0.12389	4.6101	4.02482e-06	9.95565e-05
ENSG00000091136	30164.3	-0.209788	0.0455469	-4.60598	4.10537e-06	0.00010141
ENSG00000185418	680.69	-0.463307	0.100646	-4.60334	4.15775e-06	0.000102564
ENSG00000152127	3229.49	0.212767	0.0462278	4.60257	4.17304e-06	0.0001028
ENSG00000160886	319.337	0.696065	0.151245	4.60224	4.17971e-06	0.000102824
ENSG00000167281	16.2675	-0.691922	0.150442	-4.59927	4.23982e-06	0.000104161
ENSG00000119326	8570.17	-0.328252	0.0713839	-4.59841	4.25724e-06	0.000104447
ENSG00000198743	765.437	-0.332911	0.0724611	-4.59434	4.34115e-06	0.000106361
ENSG00000171365	866.825	-0.355458	0.0773738	-4.59404	4.34745e-06	0.000106371
ENSG00000180447	6371.84	-0.345062	0.0751985	-4.58868	4.46067e-06	0.000108994
ENSG00000126803	2270.09	-0.368764	0.0804283	-4.58501	4.53966e-06	0.000110774
ENSG00000107560	1595.13	-0.318431	0.0694741	-4.58345	4.57373e-06	0.000111455
ENSG00000104415	99.7404	-0.612675	0.133726	-4.58156	4.61509e-06	0.000112311
ENSG00000107438	4434.9	-0.289675	0.0632415	-4.58045	4.63975e-06	0.000112759
ENSG00000117411	2944	0.338595	0.0739403	4.5793	4.66533e-06	0.000113228
ENSG00000143341	86.3573	-0.63038	0.137738	-4.57667	4.72437e-06	0.000114507
ENSG00000261934	69.2534	0.705188	0.154177	4.57389	4.78744e-06	0.00011588
ENSG00000156466	3127.91	-0.249456	0.054572	-4.57114	4.85078e-06	0.000117256
ENSG00000205336	144.609	0.581637	0.127293	4.56929	4.89382e-06	0.000118139
ENSG00000138386	2113.3	-0.389415	0.0852414	-4.56838	4.91519e-06	0.000118496
ENSG00000166922	158.951	0.514189	0.112564	4.56796	4.92494e-06	0.000118573
ENSG00000136404	33.1616	-0.733257	0.160572	-4.56653	4.95864e-06	0.000119225
ENSG00000075643	1637.56	-0.313851	0.068746	-4.56537	4.98616e-06	0.000119728
ENSG00000127463	5939.81	0.190975	0.0418435	4.56403	5.01798e-06	0.000120332
ENSG00000053254	4589.19	-0.325185	0.0712659	-4.56298	5.04333e-06	0.000120779
ENSG00000133816	8800.11	0.258027	0.0565635	4.56172	5.07353e-06	0.000121341
ENSG00000115318	1912.5	0.334085	0.0732776	4.55917	5.13553e-06	0.000122662
ENSG00000113231	800.162	-0.334914	0.0735378	-4.55432	5.25564e-06	0.000125365
ENSG00000140577	2853.1	-0.260346	0.0571845	-4.55274	5.2952e-06	0.000126142
ENSG00000118526	24.4354	0.731961	0.160831	4.55111	5.33639e-06	0.000126956
ENSG00000198929	74.9644	-0.674233	0.148219	-4.5489	5.39271e-06	0.00012812
ENSG00000116117	2889.43	-0.349876	0.076919	-4.54863	5.39953e-06	0.00012812
ENSG00000073111	852.175	0.438637	0.0966397	4.53889	5.65507e-06	0.000134007
ENSG00000173193	3471.44	-0.329427	0.0726154	-4.5366	5.71692e-06	0.000135295
ENSG00000176532	55.9048	0.664434	0.146507	4.53517	5.75559e-06	0.000136032
ENSG00000187123	645.672	0.322556	0.0711431	4.5339	5.79044e-06	0.000136677
ENSG00000137672	373.208	-0.430228	0.0950361	-4.52699	5.98287e-06	0.000141035
ENSG00000270069	148.627	0.58869	0.130056	4.52645	5.99832e-06	0.000141215
ENSG00000101057	344.045	0.541253	0.119792	4.51826	6.23491e-06	0.000146593
ENSG00000183258	2108.56	0.318454	0.0704873	4.51789	6.2458e-06	0.000146659
ENSG00000177606	4527.67	0.509089	0.112739	4.51562	6.31314e-06	0.000148047
ENSG00000132846	869.466	-0.3357	0.0743956	-4.51236	6.41101e-06	0.000150147
ENSG00000197358	2468.39	0.32043	0.0710704	4.50863	6.52483e-06	0.000152615
ENSG00000251151	14.0827	-0.696296	0.154456	-4.50805	6.54273e-06	0.000152836
ENSG00000248810	16.2329	0.693036	0.15381	4.5058	6.61245e-06	0.000154265
ENSG00000091831	164.072	-0.530681	0.117808	-4.50461	6.64947e-06	0.000154774
ENSG00000132970	1733.65	-0.258132	0.0573048	-4.50455	6.65141e-06	0.000154774
ENSG00000109756	3533.37	-0.273831	0.0607995	-4.50384	6.67364e-06	0.000155091
ENSG00000082146	923.416	-0.286127	0.0635557	-4.50199	6.73209e-06	0.000156249
ENSG00000125848	721.847	-0.487962	0.108435	-4.50003	6.79446e-06	0.000157494
ENSG00000068028	1384.36	0.328981	0.0732042	4.49401	6.98931e-06	0.000161803
ENSG00000253958	81.398	-0.63019	0.14039	-4.48886	7.16042e-06	0.000165551
ENSG00000186487	7.90688	-0.59464	0.132536	-4.48663	7.23586e-06	0.000167066
ENSG00000101447	236.165	0.500599	0.111582	4.48638	7.24445e-06	0.000167066
ENSG00000221866	119.783	-0.643976	0.143551	-4.48606	7.25523e-06	0.000167102
ENSG00000146670	267.639	0.517899	0.115543	4.48232	7.38374e-06	0.000169845
ENSG00000205517	100.881	-0.653865	0.14611	-4.47515	7.63578e-06	0.000175419
ENSG00000184226	175.34	0.541232	0.120975	4.47391	7.6802e-06	0.000176215
ENSG00000153071	23033.9	0.225232	0.0503624	4.47223	7.74095e-06	0.000177384
ENSG00000111885	1679.78	-0.443454	0.0991907	-4.47072	7.79558e-06	0.000178183
ENSG00000126016	326.606	-0.475263	0.106302	-4.4709	7.78925e-06	0.000178183
ENSG00000168610	10412.4	-0.188019	0.0420746	-4.4687	7.86951e-06	0.000179646
ENSG00000168702	88.5053	0.651406	0.145821	4.46716	7.92656e-06	0.000180481
ENSG00000128699	3214.28	-0.307541	0.0688531	-4.46663	7.94609e-06	0.000180481
ENSG00000167553	4456.35	0.302912	0.0678167	4.46663	7.94602e-06	0.000180481
ENSG00000165959	184.492	-0.499381	0.111787	-4.46726	7.92273e-06	0.000180481
ENSG00000065978	10754	0.167361	0.037477	4.4657	7.98078e-06	0.000181041
ENSG00000123178	505.961	0.363265	0.0813671	4.46452	8.02481e-06	0.000181812
ENSG00000164949	523.669	-0.379039	0.0850606	-4.4561	8.34628e-06	0.000188858
ENSG00000092607	328.619	-0.448683	0.100707	-4.45535	8.37573e-06	0.000189287
ENSG00000067225	85237.4	0.277313	0.0622605	4.45408	8.42545e-06	0.000190173
ENSG00000123219	132.786	0.535367	0.120325	4.44934	8.61345e-06	0.000194032
ENSG00000078124	1214.29	-0.311528	0.0700184	-4.44923	8.61791e-06	0.000194032
ENSG00000172379	3902.56	-0.292117	0.0657024	-4.44606	8.74583e-06	0.000196667
ENSG00000165685	290.406	0.440832	0.0992757	4.44048	8.97566e-06	0.000201584
ENSG00000166347	2567.77	-0.339225	0.0764287	-4.43845	9.06101e-06	0.000203248
ENSG00000180346	1378.49	-0.281038	0.0633268	-4.4379	9.08417e-06	0.000203505
ENSG00000103512	3936.7	0.191767	0.0432138	4.43764	9.095e-06	0.000203505
ENSG00000112378	12963.6	-0.301074	0.0679312	-4.43205	9.33432e-06	0.000208601
ENSG00000065328	161.918	0.525234	0.118521	4.43158	9.35434e-06	0.00020879
ENSG00000004866	1204.42	-0.358673	0.0809804	-4.42914	9.46107e-06	0.000210912
ENSG00000188215	1257.77	0.31361	0.070839	4.42709	9.55145e-06	0.000212664
ENSG00000114670	168.761	0.496209	0.11221	4.42215	9.77215e-06	0.00021731
ENSG00000100196	4417.05	0.287188	0.0649721	4.42017	9.8622e-06	0.000219043
ENSG00000101347	1135.49	-0.273342	0.0618454	-4.41977	9.88079e-06	0.000219186
ENSG00000106772	1157.72	0.354226	0.0801744	4.41819	9.95305e-06	0.000220518
ENSG00000166938	1082.91	-0.260935	0.0591035	-4.41488	1.01068e-05	0.000223651
ENSG00000056998	611.325	-0.332756	0.0754661	-4.40935	1.03682e-05	0.000229154
ENSG00000116667	1952.45	-0.360713	0.0818299	-4.40808	1.04293e-05	0.000230222
ENSG00000123485	358.701	0.422447	0.0958563	4.40709	1.04771e-05	0.000230994
ENSG00000164649	1142.61	0.297244	0.0674701	4.40557	1.05508e-05	0.000232335
ENSG00000128656	1362.34	-0.298362	0.0678441	-4.39776	1.09376e-05	0.000240561
ENSG00000143190	640.171	-0.399125	0.0909786	-4.38702	1.14915e-05	0.000252436
ENSG00000120645	9.49438	0.613366	0.139865	4.38541	1.15766e-05	0.000253996
ENSG00000188313	696.583	-0.353212	0.0806299	-4.38066	1.18321e-05	0.000259287
ENSG00000104723	3026.48	0.285685	0.0652378	4.37913	1.19153e-05	0.000260792
ENSG00000161267	106.157	-0.558378	0.127538	-4.37813	1.19705e-05	0.000261684
ENSG00000138771	2788.22	0.272756	0.0623509	4.37453	1.21693e-05	0.000265708
ENSG00000131386	439.868	0.42322	0.0968444	4.37011	1.24187e-05	0.000270826
ENSG00000103196	6947.07	-0.356094	0.0815114	-4.36864	1.2502e-05	0.000272315
ENSG00000157570	115.253	-0.528782	0.1211	-4.36648	1.26265e-05	0.000274696
ENSG00000123595	1059.91	-0.366404	0.0839283	-4.36568	1.26727e-05	0.000275367
ENSG00000163453	9181.86	-0.21655	0.0496443	-4.36204	1.28856e-05	0.000279657
ENSG00000111640	95912.8	0.261843	0.0600797	4.35826	1.31101e-05	0.000284188
ENSG00000128422	398.694	0.442798	0.101613	4.35767	1.31456e-05	0.000284617
ENSG00000157833	251.667	0.418796	0.0961339	4.35638	1.32232e-05	0.000285954
ENSG00000184254	186.972	-0.576769	0.132452	-4.35456	1.33335e-05	0.000287994
ENSG00000187098	1494.64	-0.266178	0.061197	-4.34952	1.36437e-05	0.000294342
ENSG00000154175	312.602	0.551854	0.126907	4.3485	1.37074e-05	0.000295363
ENSG00000171067	3671.55	0.269731	0.0620421	4.34756	1.37663e-05	0.000296279
ENSG00000173207	135.539	0.508388	0.116996	4.34533	1.39064e-05	0.000298939
ENSG00000185745	1345.26	-0.360136	0.082887	-4.3449	1.39338e-05	0.00029917
ENSG00000133808	14.0729	0.667394	0.153657	4.3434	1.40295e-05	0.000300869
ENSG00000128294	966.818	0.26875	0.0619457	4.33848	1.43469e-05	0.000307309
ENSG00000154479	28.3278	-0.699175	0.16133	-4.33383	1.46538e-05	0.000313475
ENSG00000170412	71.5373	-0.692563	0.159813	-4.33359	1.46695e-05	0.000313475
ENSG00000105889	85.8075	0.653176	0.150914	4.32815	1.50369e-05	0.000320946
ENSG00000006453	323.699	0.422778	0.0976993	4.32734	1.50918e-05	0.000321739
ENSG00000233859	1929.8	-0.28087	0.0649158	-4.32668	1.51374e-05	0.00032233
ENSG00000168016	1968.82	-0.322539	0.0746303	-4.32183	1.54743e-05	0.000329117
ENSG00000115109	798.481	-0.280259	0.0648955	-4.31861	1.57012e-05	0.000333548
ENSG00000188064	52.2488	0.688772	0.159537	4.31732	1.57934e-05	0.000335113
ENSG00000140526	3144.88	-0.244782	0.0567069	-4.31662	1.58436e-05	0.000335784
ENSG00000155660	11046.5	0.206557	0.0479547	4.30732	1.65242e-05	0.000349798
ENSG00000117152	1164.48	0.679321	0.157796	4.30505	1.66952e-05	0.00035259
ENSG00000082482	818.571	0.335786	0.077998	4.30506	1.66938e-05	0.00035259
ENSG00000130720	107.259	0.605951	0.140778	4.30431	1.67505e-05	0.000353346
ENSG00000182963	1274.41	0.253943	0.0590615	4.29963	1.71082e-05	0.000360471
ENSG00000104889	265.837	0.499018	0.116158	4.29604	1.73877e-05	0.000365932
ENSG00000134802	246.193	0.406304	0.0946224	4.29395	1.75519e-05	0.000368958
ENSG00000139364	449.472	-0.402641	0.0937894	-4.29303	1.76251e-05	0.000370066
ENSG00000145439	543.747	-0.361794	0.0843167	-4.29089	1.77957e-05	0.000373214
ENSG00000129195	177.356	0.476055	0.110967	4.29006	1.78628e-05	0.000374186
ENSG00000125730	666.92	-0.342895	0.0799337	-4.28974	1.78881e-05	0.000374281
ENSG00000085511	984.563	-0.299595	0.0698839	-4.28703	1.81075e-05	0.000378434
ENSG00000112715	8190.28	0.226908	0.0529635	4.28424	1.83366e-05	0.00038278
ENSG00000109458	1317.36	-0.288619	0.0674128	-4.28137	1.85744e-05	0.000387296
ENSG00000109625	249.521	-0.435	0.101663	-4.27883	1.87876e-05	0.000391083
ENSG00000133687	6992.55	-0.203908	0.0476567	-4.27869	1.87994e-05	0.000391083
ENSG00000155850	1824.22	-0.331856	0.0776163	-4.2756	1.90624e-05	0.000396098
ENSG00000112559	33.3133	-0.686518	0.160607	-4.27453	1.9154e-05	0.000397545
ENSG00000158747	591.837	0.49408	0.115639	4.2726	1.93206e-05	0.000400542
ENSG00000248698	168.889	0.507067	0.118696	4.27196	1.93759e-05	0.000401228
ENSG00000146950	228.121	0.448782	0.105119	4.26929	1.96094e-05	0.000405597
ENSG00000117122	1207.32	0.375143	0.0879441	4.2657	1.99279e-05	0.000411714
ENSG00000103187	10026.1	0.287114	0.0673691	4.2618	2.02784e-05	0.000418477
ENSG00000119943	1286.72	0.397695	0.0933484	4.26033	2.04125e-05	0.000420763
ENSG00000178764	1141.54	-0.253726	0.0595611	-4.25994	2.04485e-05	0.000421025
ENSG00000182287	1529.33	-0.375734	0.0882415	-4.25802	2.0625e-05	0.000424175
ENSG00000213949	1165.58	-0.378139	0.0888409	-4.25636	2.07782e-05	0.00042684
ENSG00000173559	5075.13	-0.273746	0.0643582	-4.25348	2.1047e-05	0.00043187
ENSG00000070087	8081.1	0.225066	0.0529588	4.24984	2.13927e-05	0.000438465
ENSG00000133805	647.766	0.333582	0.0785163	4.24857	2.15138e-05	0.000440447
ENSG00000143228	158.218	0.587293	0.138418	4.2429	2.20651e-05	0.000451222
ENSG00000162545	7563.53	-0.232053	0.0547532	-4.23817	2.25347e-05	0.000460304
ENSG00000088280	1878.03	-0.31929	0.0753802	-4.23572	2.27817e-05	0.000464823
ENSG00000145431	2068.38	0.331953	0.0785602	4.22547	2.38445e-05	0.000485959
ENSG00000138411	239.202	-0.43198	0.102274	-4.22375	2.40271e-05	0.00048913
ENSG00000254585	96.2628	0.604839	0.143238	4.22261	2.41492e-05	0.00049106
ENSG00000114270	7185.76	0.418368	0.0991195	4.22084	2.43395e-05	0.000494374
ENSG00000145555	2852.38	0.263272	0.0623813	4.22037	2.43907e-05	0.000494856
ENSG00000170775	9.51157	-0.615877	0.145962	-4.21943	2.44919e-05	0.000496354
ENSG00000065485	1604.89	0.23538	0.0558307	4.21596	2.48712e-05	0.000503475
ENSG00000197258	2676.46	-0.24071	0.057109	-4.21493	2.49858e-05	0.000505228
ENSG00000230018	11.4449	-0.593019	0.140799	-4.21182	2.53323e-05	0.000511661
ENSG00000138792	127.631	-0.605415	0.143847	-4.20874	2.56796e-05	0.000518096
ENSG00000173546	4398.85	0.477021	0.113359	4.20805	2.57582e-05	0.000519103
ENSG00000141458	6257.73	-0.329311	0.0783117	-4.20514	2.60926e-05	0.000525256
ENSG00000164168	3394.14	-0.220059	0.0523488	-4.20371	2.62577e-05	0.000527991
ENSG00000075461	15.0576	-0.656984	0.156386	-4.20103	2.65699e-05	0.000533674
ENSG00000164096	3330.38	0.366158	0.087215	4.19834	2.68883e-05	0.000539468
ENSG00000157796	1510.17	-0.317196	0.0755628	-4.19778	2.69544e-05	0.000540196
ENSG00000165304	522.932	0.469344	0.111859	4.19586	2.71834e-05	0.00054418
ENSG00000254337	25.7209	-0.661517	0.157958	-4.18793	2.81505e-05	0.000562917
ENSG00000134343	137.004	-0.593303	0.141715	-4.18658	2.83186e-05	0.000565652
ENSG00000110756	2233.7	-0.218301	0.0521768	-4.18386	2.86595e-05	0.000571828
ENSG00000125637	183.116	0.485629	0.116082	4.18349	2.87063e-05	0.00057213
ENSG00000135046	34983.2	0.269692	0.06447	4.18321	2.87419e-05	0.000572208
ENSG00000243766	69.0186	0.660213	0.158032	4.17772	2.94446e-05	0.000585551
ENSG00000102349	211.955	0.518905	0.124228	4.17705	2.95314e-05	0.000586633
ENSG00000072952	5683.06	-0.216489	0.0518405	-4.17606	2.96599e-05	0.000588536
ENSG00000053372	1435.35	0.241693	0.0578889	4.17513	2.97819e-05	0.000590309
ENSG00000132849	726.213	-0.266101	0.0637536	-4.1739	2.99429e-05	0.000592849
ENSG00000113621	4158.01	0.209054	0.0501092	4.17196	3.01985e-05	0.000597255
ENSG00000119314	4640.43	-0.289082	0.0693682	-4.16736	3.08145e-05	0.000608772
ENSG00000259291	184.909	-0.470022	0.112819	-4.16616	3.09767e-05	0.000611307
ENSG00000135828	967.162	-0.297784	0.0714869	-4.16557	3.10572e-05	0.000612025
ENSG00000188372	30.3144	-0.671551	0.161221	-4.1654	3.10809e-05	0.000612025
ENSG00000182379	570.681	0.432526	0.103902	4.16283	3.14321e-05	0.000618267
ENSG00000115963	23181.3	0.326576	0.0785146	4.15942	3.19051e-05	0.000626889
ENSG00000109861	7214.18	0.188313	0.0453095	4.15616	3.23642e-05	0.000635218
ENSG00000135540	300.217	-0.456227	0.10983	-4.15392	3.26827e-05	0.000640078
ENSG00000165801	3128.31	0.228585	0.0550263	4.1541	3.26565e-05	0.000640078
ENSG00000176485	738.684	-0.306093	0.0736955	-4.15349	3.27449e-05	0.000640601
ENSG00000154736	2568.95	-0.282925	0.0681494	-4.15154	3.30251e-05	0.000645384
ENSG00000139597	51.7802	-0.622547	0.150156	-4.14599	3.38347e-05	0.00066049
ENSG00000115828	295.292	0.409276	0.09889	4.1387	3.49284e-05	0.000681104
ENSG00000111912	2585.69	-0.304498	0.0736256	-4.13577	3.53771e-05	0.000689109
ENSG00000162616	4640.34	0.432103	0.104584	4.13164	3.60188e-05	0.000700852
ENSG00000254087	1716.01	-0.228155	0.0552608	-4.12869	3.64837e-05	0.000709135
ENSG00000178662	155.803	0.552779	0.133944	4.12693	3.67632e-05	0.000713799
ENSG00000109072	175.791	-0.495243	0.120034	-4.12584	3.6938e-05	0.000716422
ENSG00000168268	2900.61	0.351409	0.0852042	4.12431	3.71841e-05	0.000720422
ENSG00000155011	30.6154	-0.662432	0.160642	-4.12365	3.72911e-05	0.000720947
ENSG00000135476	201.941	0.429639	0.104187	4.12371	3.72819e-05	0.000720947
ENSG00000123066	5450.58	-0.168856	0.0410095	-4.11749	3.83024e-05	0.000739708
ENSG00000204624	13.4616	-0.620082	0.150629	-4.11663	3.84458e-05	0.000741065
ENSG00000117525	12688.6	0.303138	0.0736384	4.11657	3.84548e-05	0.000741065
ENSG00000065717	137.272	-0.612155	0.148778	-4.11454	3.87951e-05	0.000746826
ENSG00000148344	818.979	-0.464643	0.112946	-4.11384	3.89136e-05	0.000748309
ENSG00000142669	7770.03	0.293093	0.0712904	4.11126	3.93507e-05	0.000755911
ENSG00000140563	330.942	0.411938	0.100204	4.11099	3.93965e-05	0.000755986
ENSG00000115363	710.555	0.319401	0.077724	4.10942	3.96647e-05	0.000760324
ENSG00000158859	218.086	0.396465	0.0965013	4.10839	3.98423e-05	0.000762919
ENSG00000167323	4719.46	-0.298001	0.0726269	-4.10318	4.07513e-05	0.000779498
ENSG00000215861	215.201	-0.421956	0.102861	-4.10218	4.09284e-05	0.000782058
ENSG00000102383	10.8984	0.605898	0.147742	4.10105	4.11286e-05	0.000785051
ENSG00000225434	5.917	-0.460417	0.112435	-4.09495	4.22263e-05	0.000805154
ENSG00000088340	280.544	0.479763	0.117192	4.09384	4.24287e-05	0.000808159
ENSG00000100526	160.514	0.503065	0.123077	4.08741	4.36209e-05	0.000829993
ENSG00000134057	807.403	0.41076	0.100513	4.08664	4.37668e-05	0.000831892
ENSG00000198756	287.369	-0.423117	0.103553	-4.08598	4.38916e-05	0.000833387
ENSG00000175084	45.1004	0.642385	0.157387	4.08156	4.47344e-05	0.000848497
ENSG00000123636	1219.11	-0.269092	0.0659754	-4.07867	4.5295e-05	0.000858229
ENSG00000130413	196.086	-0.421805	0.103446	-4.07755	4.55118e-05	0.000861433
ENSG00000113070	75.8213	0.589668	0.144696	4.07523	4.59691e-05	0.000869176
ENSG00000165527	6906.97	0.289575	0.0711574	4.0695	4.71144e-05	0.000889901
ENSG00000244405	1171.32	0.338675	0.0832479	4.06828	4.73623e-05	0.000891785
ENSG00000124762	12815.1	0.33096	0.0813497	4.06836	4.73442e-05	0.000891785
ENSG00000170962	594.944	-0.428073	0.105222	-4.0683	4.73581e-05	0.000891785
ENSG00000034510	37118.1	0.27705	0.0681173	4.06725	4.75702e-05	0.000894765
ENSG00000188229	8539.14	0.38438	0.0945245	4.06646	4.77324e-05	0.000896883
ENSG00000111206	570.18	0.398932	0.0982133	4.06189	4.86763e-05	0.000913668
ENSG00000050344	1319.14	0.341451	0.0841017	4.05998	4.90775e-05	0.000920242
ENSG00000110693	236.424	0.489467	0.120568	4.05969	4.91373e-05	0.000920406
ENSG00000166342	458.402	-0.355865	0.0877215	-4.05676	4.97574e-05	0.000931056
ENSG00000072571	298.916	0.458804	0.113113	4.05617	4.98843e-05	0.0009315
ENSG00000196155	430.145	0.472933	0.116593	4.05627	4.98632e-05	0.0009315
ENSG00000167325	2099.52	0.242856	0.0598823	4.05555	5.00161e-05	0.000932996
ENSG00000163884	19.9205	-0.602314	0.148594	-4.05343	5.04724e-05	0.000940536
ENSG00000169679	468.205	0.384124	0.0948117	4.05144	5.09035e-05	0.00094699
ENSG00000121552	14.6868	-0.628008	0.155012	-4.05135	5.09236e-05	0.00094699
ENSG00000122042	3107.58	0.286627	0.070771	4.05007	5.12025e-05	0.000951198
ENSG00000176771	1189.85	-0.325581	0.0804027	-4.04938	5.13532e-05	0.000953016
ENSG00000166206	108.159	0.57436	0.142001	4.04477	5.23742e-05	0.000970232
ENSG00000172460	21.2218	-0.649526	0.160587	-4.04471	5.23883e-05	0.000970232
ENSG00000112290	1979.3	-0.222802	0.0551498	-4.03994	5.34653e-05	0.000989163
ENSG00000178033	1307.47	-0.264007	0.0653896	-4.03745	5.40359e-05	0.000998164
ENSG00000128918	14.2182	0.624938	0.15479	4.03733	5.40624e-05	0.000998164
ENSG00000114126	1724.72	-0.301952	0.074824	-4.0355	5.44871e-05	0.00100498
ENSG00000106537	208.392	0.424665	0.105243	4.03511	5.45775e-05	0.00100562
ENSG00000236609	635.87	-0.306508	0.0760343	-4.03118	5.54972e-05	0.00102152
ENSG00000197461	1057.87	-0.25953	0.0644175	-4.02887	5.60445e-05	0.0010295
ENSG00000017427	57.8091	-0.623703	0.154808	-4.02889	5.60409e-05	0.0010295
ENSG00000134198	273.396	-0.498801	0.12388	-4.0265	5.66133e-05	0.00103889
ENSG00000161888	88.9149	0.54683	0.135836	4.02567	5.68128e-05	0.00104149
ENSG00000119185	2523.48	0.193058	0.0479791	4.0238	5.72669e-05	0.00104844
ENSG00000164342	291.505	-0.401417	0.099765	-4.02363	5.7308e-05	0.00104844
ENSG00000124151	3416.4	-0.211631	0.0526112	-4.02255	5.75706e-05	0.00105218
ENSG00000148926	16158.5	0.246295	0.06125	4.02113	5.79189e-05	0.00105747
ENSG00000172915	2839.54	-0.207579	0.0516455	-4.0193	5.83708e-05	0.00106465
ENSG00000176595	341.424	-0.364028	0.090593	-4.01828	5.86233e-05	0.00106745
ENSG00000180806	45.4088	-0.634786	0.157987	-4.01797	5.87018e-05	0.00106745
ENSG00000139278	1764.85	0.304173	0.0757023	4.01801	5.86914e-05	0.00106745
ENSG00000066084	3145.32	-0.251834	0.0626934	-4.01692	5.8964e-05	0.00107114
ENSG00000158290	22682.6	-0.338626	0.0843834	-4.01295	5.99652e-05	0.00108823
ENSG00000141526	8919.36	0.435926	0.108669	4.01149	6.03362e-05	0.00109387
ENSG00000162840	229.484	0.49645	0.123785	4.01058	6.05697e-05	0.001097
ENSG00000137807	861.989	0.317584	0.0791938	4.01021	6.06653e-05	0.00109763
ENSG00000163947	262.303	-0.424356	0.105959	-4.00492	6.20389e-05	0.00112136
ENSG00000143106	5303.34	-0.209637	0.0523895	-4.0015	6.29416e-05	0.00113525
ENSG00000143641	8865.17	0.194776	0.0486739	4.00164	6.29043e-05	0.00113525
ENSG00000005471	62.1659	-0.604642	0.151111	-4.0013	6.29961e-05	0.00113525
ENSG00000154133	22.4282	0.63007	0.157489	4.00071	6.31526e-05	0.00113694
ENSG00000111665	218.116	0.418267	0.104591	3.99906	6.35951e-05	0.00114376
ENSG00000146729	2647.98	-0.258779	0.0647299	-3.99783	6.39256e-05	0.00114856
ENSG00000142156	87925	0.399389	0.0999312	3.99664	6.42471e-05	0.00115319
ENSG00000260910	236.531	0.380168	0.0951308	3.99626	6.43498e-05	0.00115389
ENSG00000157045	907.129	0.286423	0.0717024	3.99461	6.47996e-05	0.0011608
ENSG00000157657	1615.05	-0.26948	0.0675093	-3.99175	6.55873e-05	0.00117375
ENSG00000047936	44.2574	0.608973	0.152582	3.99112	6.57625e-05	0.00117572
ENSG00000123146	3561.53	0.313917	0.0786919	3.98919	6.63004e-05	0.00118299
ENSG00000166897	164.768	0.572042	0.143398	3.9892	6.62952e-05	0.00118299
ENSG00000184860	34.5137	0.628469	0.157566	3.98859	6.64664e-05	0.00118478
ENSG00000127561	240.43	-0.520843	0.130599	-3.9881	6.66046e-05	0.00118608
ENSG00000095015	947.883	-0.28811	0.0723111	-3.98431	6.76778e-05	0.001204
ENSG00000061656	120.98	0.561562	0.14104	3.98157	6.8462e-05	0.00121675
ENSG00000189057	255.185	0.526756	0.132324	3.9808	6.86835e-05	0.00121949
ENSG00000085840	81.3733	0.563239	0.141506	3.98033	6.88198e-05	0.00121951
ENSG00000084676	2041.47	-0.238304	0.0598689	-3.98044	6.87887e-05	0.00121951
ENSG00000185551	9809.18	0.258631	0.0649855	3.97983	6.89648e-05	0.00122088
ENSG00000204520	1182.08	0.240632	0.0604672	3.97954	6.90499e-05	0.00122119
ENSG00000253537	417.764	-0.35042	0.0880864	-3.97814	6.94576e-05	0.0012272
ENSG00000132972	7.15676	0.521996	0.131225	3.97788	6.95322e-05	0.00122732
ENSG00000033327	1585.18	-0.252136	0.0634914	-3.97119	7.15159e-05	0.0012611
ENSG00000130066	987.506	0.289346	0.0729088	3.9686	7.22956e-05	0.0012736
ENSG00000253837	86.9817	0.557339	0.140456	3.96805	7.24622e-05	0.00127405
ENSG00000004660	327.946	0.373028	0.0940076	3.96806	7.24614e-05	0.00127405
ENSG00000189410	575.937	0.418492	0.105509	3.9664	7.29657e-05	0.00128165
ENSG00000151414	22176.1	0.305362	0.0771272	3.9592	7.52028e-05	0.00131967
ENSG00000095739	290.529	-0.369645	0.0934133	-3.95709	7.58683e-05	0.00133005
ENSG00000242779	130.094	0.503692	0.127322	3.95606	7.61957e-05	0.0013345
ENSG00000109805	426.47	0.433593	0.109761	3.95036	7.80351e-05	0.00136275
ENSG00000016082	489.652	-0.311976	0.0789718	-3.95048	7.79946e-05	0.00136275
ENSG00000006327	3231.92	0.35587	0.0900837	3.95043	7.80105e-05	0.00136275
ENSG00000150667	65.6077	-0.575036	0.145577	-3.95005	7.8135e-05	0.00136317
ENSG00000104611	9042.56	-0.160979	0.0407828	-3.94723	7.90621e-05	0.00137802
ENSG00000144229	50.7641	-0.592276	0.150143	-3.94474	7.98855e-05	0.00139103
ENSG00000204314	71.1716	-0.586703	0.148739	-3.94451	7.99626e-05	0.00139103
ENSG00000160963	103.165	-0.578646	0.146981	-3.93689	8.25448e-05	0.00143456
ENSG00000166794	7347.75	0.203288	0.0516407	3.93659	8.2648e-05	0.00143498
ENSG00000213080	892.411	0.289364	0.0735782	3.93274	8.39838e-05	0.00145537
ENSG00000164576	2429.94	-0.208379	0.0529842	-3.93285	8.3944e-05	0.00145537
ENSG00000111554	457.36	-0.325308	0.0827638	-3.93056	8.47483e-05	0.00146721
ENSG00000164283	20.2168	0.619748	0.157747	3.92875	8.53895e-05	0.00147689
ENSG00000187134	284.016	-0.398203	0.101429	-3.92594	8.63907e-05	0.00149135
ENSG00000107562	5575.79	-0.354634	0.0903291	-3.92603	8.6361e-05	0.00149135
ENSG00000172301	1459.64	0.241091	0.0614173	3.92546	8.65649e-05	0.00149293
ENSG00000175899	573.627	-0.414329	0.105599	-3.92361	8.72335e-05	0.00150303
ENSG00000165288	1252.46	-0.314995	0.080292	-3.92311	8.74114e-05	0.00150466
ENSG00000076513	11716.6	-0.204064	0.0520512	-3.92044	8.83881e-05	0.00152002
ENSG00000088325	1257.86	0.365431	0.0932875	3.91725	8.95641e-05	0.00153878
ENSG00000169594	50.6447	0.625333	0.159713	3.91536	9.02708e-05	0.00154816
ENSG00000170037	949.492	0.285277	0.0728615	3.91533	9.02814e-05	0.00154816
ENSG00000188643	6370.46	0.26302	0.0671948	3.91429	9.06707e-05	0.00155336
ENSG00000100234	39806.4	0.263928	0.0674598	3.91237	9.13929e-05	0.00156425
ENSG00000213585	8297.83	0.186435	0.0476606	3.91173	9.1636e-05	0.00156692
ENSG00000219891	79.8212	-0.537179	0.137418	-3.90909	9.26461e-05	0.0015827
ENSG00000095637	20.7735	-0.624848	0.15993	-3.90701	9.34446e-05	0.00159483
ENSG00000154217	437.193	-0.304626	0.0779815	-3.90639	9.36854e-05	0.00159691
ENSG00000105011	154.567	0.480717	0.123064	3.90624	9.37436e-05	0.00159691
ENSG00000118785	26.6341	0.630148	0.161333	3.90589	9.38801e-05	0.00159773
ENSG00000166398	2162.45	-0.299382	0.0766537	-3.90564	9.39767e-05	0.00159787
ENSG00000174371	147.55	0.526238	0.13477	3.9047	9.43414e-05	0.00160256
ENSG00000078687	574.009	-0.369103	0.0945759	-3.90272	9.51193e-05	0.00161426
ENSG00000028137	138.853	0.514512	0.131862	3.90189	9.54426e-05	0.0016167
ENSG00000240694	2037.17	-0.263765	0.0675965	-3.90205	9.53827e-05	0.0016167
ENSG00000116141	1428.18	-0.271152	0.0695244	-3.9001	9.61547e-05	0.00162724
ENSG00000134201	68.7305	-0.551319	0.141373	-3.89975	9.62912e-05	0.00162802
ENSG00000167513	96.9004	0.578941	0.148499	3.89862	9.67428e-05	0.00163413
ENSG00000121743	22.958	0.618149	0.158614	3.89718	9.73178e-05	0.00164231
ENSG00000185088	6284.59	0.203493	0.0522865	3.89188	9.94692e-05	0.00167705
ENSG00000164694	197.947	-0.438661	0.11273	-3.89125	9.97311e-05	0.00167989
ENSG00000135245	587.888	0.402689	0.103565	3.88827	0.000100961	0.00169902
ENSG00000091409	3797.12	0.224355	0.057716	3.88722	0.000101401	0.00170484
ENSG00000147852	4924.73	-0.193848	0.0498808	-3.88622	0.000101816	0.00171023
ENSG00000237264	3729.42	0.22923	0.0590191	3.884	0.00010275	0.00172271
ENSG00000103489	1370.82	0.253878	0.0653641	3.88406	0.000102728	0.00172271
ENSG00000119638	5618.51	-0.179053	0.0461345	-3.88111	0.000103981	0.00174173
ENSG00000179431	522.888	0.392307	0.101113	3.87988	0.000104506	0.0017489
ENSG00000169607	296.265	0.443724	0.114388	3.87911	0.000104838	0.00175284
ENSG00000162437	443.778	-0.29448	0.0759423	-3.87768	0.000105459	0.00176159
ENSG00000130939	3691.2	-0.184102	0.0474901	-3.87664	0.00010591	0.0017659
ENSG00000106003	156.035	0.465725	0.120137	3.87663	0.000105913	0.0017659
ENSG00000154027	630.193	0.3153	0.0813754	3.87463	0.000106786	0.00177881
ENSG00000183579	376.437	-0.357926	0.0924156	-3.873	0.000107502	0.00178909
ENSG00000135424	1601.73	0.3343	0.0865254	3.8636	0.000111728	0.00185771
ENSG00000261573	38.3963	0.620964	0.160869	3.86005	0.000113365	0.00188319
ENSG00000169193	377.88	-0.359493	0.0931438	-3.85955	0.000113596	0.0018853
ENSG00000112079	5256.37	-0.248139	0.0643044	-3.85881	0.00011394	0.00188927
ENSG00000176890	494.453	0.39972	0.103658	3.85612	0.000115199	0.00190839
ENSG00000162783	2118.32	0.242806	0.062983	3.85511	0.000115678	0.00191457
ENSG00000182771	802.382	-0.33965	0.0881188	-3.85445	0.000115989	0.00191795
ENSG00000079616	311.028	0.394618	0.102426	3.85271	0.000116817	0.00192989
ENSG00000213699	3109.7	-0.282145	0.0732853	-3.84995	0.00011814	0.00194997
ENSG00000117298	15323.1	0.253927	0.0661704	3.83746	0.000124311	0.00204994
ENSG00000137812	346.633	0.368272	0.0960495	3.83419	0.000125981	0.00207558
ENSG00000249669	413.79	-0.362844	0.0946992	-3.83154	0.000127342	0.00209539
ENSG00000204397	33.4765	-0.609698	0.159132	-3.8314	0.000127415	0.00209539
ENSG00000012048	455.039	0.375339	0.097984	3.83061	0.000127824	0.00210019
ENSG00000165821	692.464	-0.334604	0.0873698	-3.82974	0.000128278	0.00210574
ENSG00000106780	969.361	-0.355097	0.0927924	-3.82678	0.000129829	0.00212919
ENSG00000125844	23030.6	0.196526	0.0513583	3.82657	0.000129942	0.00212919
ENSG00000125821	1782.41	0.227648	0.0595069	3.82557	0.000130471	0.00213592
ENSG00000119630	103.212	0.525906	0.137505	3.82462	0.000130972	0.00214218
ENSG00000178919	18.5303	0.598574	0.156589	3.82258	0.000132062	0.00215805
ENSG00000089280	6364.54	0.217803	0.0570306	3.81905	0.000133966	0.00218719
ENSG00000090889	269.53	0.367771	0.0964234	3.81413	0.000136663	0.0022292
ENSG00000166851	336.122	0.467977	0.122801	3.81087	0.00013848	0.0022568
ENSG00000168061	241.043	0.460285	0.120899	3.80717	0.000140564	0.0022887
ENSG00000268034	980.857	0.236213	0.0620555	3.80647	0.000140962	0.00229311
ENSG00000138821	646.65	-0.309042	0.0812205	-3.80498	0.000141818	0.00230495
ENSG00000149212	117.472	0.491852	0.129354	3.80238	0.00014331	0.00232712
ENSG00000099968	3409.74	-0.200877	0.0528674	-3.79963	0.000144911	0.002351
ENSG00000226900	17.9565	-0.582004	0.153205	-3.79886	0.000145361	0.00235617
ENSG00000125868	29346.1	-0.223579	0.0588613	-3.7984	0.000145634	0.00235848
ENSG00000102763	1822.73	-0.21972	0.0578545	-3.79781	0.000145981	0.00236198
ENSG00000198826	895.391	0.357347	0.0942454	3.79166	0.000149642	0.00241905
ENSG00000197555	3706.31	-0.180308	0.0475744	-3.79001	0.000150639	0.00243299
ENSG00000152684	1498.82	0.213582	0.0563824	3.78809	0.000151809	0.00244971
ENSG00000179604	2302.96	-0.233168	0.0616135	-3.78437	0.000154097	0.0024844
ENSG00000005238	1237.54	0.254176	0.0672238	3.78105	0.000156171	0.00251559
ENSG00000115183	2488.62	-0.16589	0.043881	-3.78046	0.000156539	0.00251927
ENSG00000119711	724.142	-0.274715	0.0726797	-3.7798	0.000156957	0.00252375
ENSG00000169242	62.4117	-0.581344	0.153932	-3.77662	0.000158973	0.0025539
ENSG00000171914	1687.87	0.263939	0.069896	3.77617	0.000159258	0.00255619
ENSG00000138756	1350.08	-0.265553	0.0703286	-3.77589	0.000159437	0.0025568
ENSG00000134326	68.3737	-0.54389	0.144118	-3.77392	0.000160703	0.00257481
ENSG00000150347	14934.8	-0.215066	0.0570306	-3.77106	0.000162556	0.00260219
ENSG00000179041	561.963	0.369975	0.098192	3.76788	0.000164643	0.00263326
ENSG00000133943	921.548	-0.279831	0.0743268	-3.76488	0.000166632	0.00266272
ENSG00000010030	80.8735	-0.548545	0.145757	-3.76341	0.000167614	0.00267605
ENSG00000164220	2178.18	0.191053	0.0507915	3.76151	0.000168887	0.00269124
ENSG00000125675	1268.65	0.2802	0.0744931	3.76143	0.000168947	0.00269124
ENSG00000203772	210.898	0.471605	0.125382	3.76133	0.000169013	0.00269124
ENSG00000162063	283.401	0.404071	0.107459	3.76023	0.00016976	0.00270076
ENSG00000129038	4541.74	0.456811	0.121561	3.75787	0.000171365	0.0027239
ENSG00000102385	15.5257	0.551839	0.146859	3.75761	0.000171541	0.00272428
ENSG00000184564	48.2561	0.601974	0.160607	3.74812	0.000178162	0.00282447
ENSG00000102606	3789.05	-0.199662	0.0532681	-3.74825	0.000178074	0.00282447
ENSG00000113368	734.473	0.416149	0.111274	3.73985	0.000184132	0.00291655
ENSG00000151640	1240.01	0.428643	0.114629	3.7394	0.000184458	0.00291916
ENSG00000115232	5349.39	0.263104	0.0704015	3.7372	0.000186083	0.0029423
ENSG00000142552	2361.67	0.455182	0.121842	3.73585	0.000187082	0.00295551
ENSG00000088448	1477.92	-0.285792	0.0765246	-3.73464	0.000187982	0.00296712
ENSG00000109685	3929.98	0.180011	0.048209	3.73398	0.000188476	0.00297233
ENSG00000117632	3749.48	0.247509	0.0663101	3.7326	0.000189511	0.00298585
ENSG00000187678	547.206	0.412258	0.110456	3.73232	0.000189725	0.00298585
ENSG00000198682	18902.4	-0.270663	0.0725216	-3.73217	0.000189835	0.00298585
ENSG00000132825	451.949	-0.324721	0.0870109	-3.73196	0.000189995	0.00298585
ENSG00000149289	569.552	-0.267309	0.0716406	-3.73125	0.000190531	0.00299167
ENSG00000130224	912.643	-0.295479	0.0792451	-3.72868	0.000192489	0.00301978
ENSG00000168496	572.38	0.370078	0.0993101	3.72649	0.000194165	0.00304344
ENSG00000180155	462.454	0.410513	0.110214	3.7247	0.000195545	0.0030624
ENSG00000182175	237.599	-0.461333	0.123925	-3.72268	0.000197118	0.00308437
ENSG00000138032	1758.03	-0.208759	0.0561455	-3.71817	0.000200672	0.00313594
ENSG00000112118	1544.4	0.243703	0.0655497	3.71784	0.000200935	0.00313594
ENSG00000104517	6907.7	-0.212868	0.0572548	-3.7179	0.000200882	0.00313594
ENSG00000176014	14461.1	0.323797	0.0871417	3.71575	0.000202601	0.00315922
ENSG00000184557	2515.52	-0.293219	0.0789984	-3.71171	0.000205867	0.00320738
ENSG00000253293	1174.39	-0.253502	0.0683364	-3.70961	0.000207575	0.0032312
ENSG00000132793	561.169	0.352623	0.0950844	3.70852	0.00020847	0.00324233
ENSG00000117069	91.3731	0.498078	0.134369	3.70678	0.000209912	0.00325919
ENSG00000125885	278.009	0.362326	0.0977469	3.70678	0.000209915	0.00325919
ENSG00000103742	688.819	0.271057	0.0732854	3.69865	0.000216749	0.00336241
ENSG00000168393	548.037	0.29055	0.0786013	3.6965	0.00021859	0.00338805
ENSG00000009950	17.758	-0.543275	0.147028	-3.69504	0.000219851	0.00340467
ENSG00000166448	901.515	-0.394087	0.106704	-3.69327	0.000221386	0.00342551
ENSG00000215089	39.3849	-0.585216	0.158532	-3.69146	0.000222973	0.00344705
ENSG00000232187	5823.69	0.160334	0.0434364	3.69124	0.00022316	0.00344705
ENSG00000072657	931.232	-0.353857	0.0958985	-3.68991	0.000224332	0.0034622
ENSG00000163251	107.196	-0.472062	0.128231	-3.68135	0.000232	0.00357747
ENSG00000167670	447.974	0.374275	0.101688	3.68063	0.000232659	0.00358458
ENSG00000214391	380.61	0.31382	0.0852761	3.68005	0.000233189	0.00358968
ENSG00000075618	5383.36	0.441039	0.119937	3.67727	0.000235743	0.00362591
ENSG00000170677	2183.4	0.223473	0.0608231	3.67415	0.000238641	0.00366735
ENSG00000103811	1094.59	-0.328864	0.0895188	-3.67369	0.000239076	0.00367092
ENSG00000109472	641.661	0.281627	0.0766666	3.67339	0.000239351	0.00367202
ENSG00000139209	519.628	-0.341384	0.0929495	-3.67279	0.000239918	0.00367759
ENSG00000131831	12.7918	-0.552607	0.150501	-3.6718	0.000240851	0.00368876
ENSG00000102452	219.793	-0.41217	0.112329	-3.66931	0.000243207	0.00372169
ENSG00000175048	656.013	-0.27244	0.0742642	-3.66852	0.000243961	0.00373006
ENSG00000196693	700.141	-0.310999	0.0847824	-3.6682	0.000244263	0.00373152
ENSG00000198028	43.7158	0.566994	0.154582	3.66793	0.000244526	0.00373238
ENSG00000213719	11318.1	0.18525	0.050581	3.66245	0.000249816	0.0038067
ENSG00000102804	4253.71	-0.195646	0.0534172	-3.66261	0.00024966	0.0038067
ENSG00000081818	32.4621	-0.582143	0.15905	-3.66013	0.000252084	0.00383801
ENSG00000127586	136.098	0.514822	0.140726	3.65834	0.000253859	0.00386178
ENSG00000108306	1150.4	-0.23134	0.0632445	-3.65787	0.00025432	0.00386553
ENSG00000126787	402.678	0.403188	0.110334	3.65424	0.000257941	0.00391728
ENSG00000154767	2285.24	-0.227085	0.0621978	-3.65102	0.000261204	0.00396349
ENSG00000177570	734.67	-0.37082	0.101638	-3.64844	0.000263839	0.00400012
ENSG00000035499	65.6579	0.516989	0.141777	3.64649	0.000265844	0.00402713
ENSG00000119402	5500.92	-0.204803	0.0561928	-3.64464	0.000267761	0.00405278
ENSG00000087245	83080.2	0.167263	0.0459291	3.64175	0.000270788	0.00409516
ENSG00000134539	59.652	-0.544372	0.149577	-3.63941	0.000273261	0.00412909
ENSG00000172986	733.781	-0.396107	0.10889	-3.63769	0.000275092	0.00415329
ENSG00000122203	5578.32	0.165962	0.0456594	3.63478	0.000278221	0.00419352
ENSG00000254602	108.328	-0.453714	0.124825	-3.6348	0.000278196	0.00419352
ENSG00000105355	4714.71	0.386963	0.106486	3.63394	0.000279131	0.00420372
ENSG00000146094	120.835	0.43046	0.118566	3.63056	0.000282808	0.00425556
ENSG00000114480	7326.38	0.260497	0.0717638	3.62993	0.000283502	0.00426244
ENSG00000063046	14469.3	-0.239576	0.0660071	-3.62955	0.000283916	0.00426447
ENSG00000137809	4060.22	0.223099	0.0614705	3.62937	0.000284109	0.00426447
ENSG00000079101	294.475	-0.370057	0.101973	-3.62898	0.000284538	0.00426737
ENSG00000258673	12.5026	-0.528477	0.145663	-3.62808	0.000285531	0.00427458
ENSG00000165072	417.61	-0.354699	0.0977641	-3.6281	0.000285509	0.00427458
ENSG00000187741	170.623	0.489195	0.134842	3.62791	0.00028573	0.00427458
ENSG00000221829	322.386	0.321739	0.0887994	3.62321	0.000290969	0.00434936
ENSG00000171940	2615.86	0.224246	0.0618977	3.62286	0.000291369	0.00435173
ENSG00000250722	68.3824	-0.508216	0.140403	-3.61969	0.000294953	0.00440163
ENSG00000081377	1446.93	-0.220165	0.0608348	-3.61906	0.000295673	0.00440872
ENSG00000118503	344.485	0.364224	0.100679	3.61768	0.000297258	0.0044287
ENSG00000129048	2073.42	0.313373	0.0866592	3.61616	0.000299007	0.00445108
ENSG00000091972	41.0191	-0.571905	0.158198	-3.61512	0.000300207	0.00446528
ENSG00000182580	611.965	-0.398049	0.110154	-3.61357	0.000302012	0.00448842
ENSG00000173641	874.404	-0.311416	0.0862131	-3.61217	0.00030365	0.00450905
ENSG00000184867	3308.79	0.195814	0.0542265	3.61104	0.000304975	0.00452129
ENSG00000119655	2897.1	0.229213	0.063475	3.61108	0.000304928	0.00452129
ENSG00000187824	279.364	-0.381872	0.105817	-3.60882	0.000307597	0.00455643
ENSG00000136999	1360.54	0.303448	0.0841031	3.60804	0.000308519	0.00456259
ENSG00000062725	2846.22	-0.252305	0.0699284	-3.60805	0.000308502	0.00456259
ENSG00000119283	16.5397	-0.548187	0.152061	-3.60504	0.000312107	0.00461188
ENSG00000204267	761.397	-0.226642	0.0628795	-3.60438	0.000312901	0.00461984
ENSG00000180592	142.965	-0.46432	0.128858	-3.60335	0.000314143	0.00463437
ENSG00000151692	139.552	-0.447506	0.124223	-3.60244	0.000315241	0.00463543
ENSG00000145675	2712.68	-0.220202	0.0611236	-3.60257	0.000315091	0.00463543
ENSG00000224861	4538.3	0.171121	0.0474998	3.60257	0.000315093	0.00463543
ENSG00000265415	45.045	0.570768	0.158417	3.60293	0.000314646	0.00463543
ENSG00000047634	966.723	-0.250984	0.0696959	-3.60113	0.000316835	0.00465508
ENSG00000134313	5794.92	-0.174187	0.0483869	-3.59988	0.000318362	0.00467372
ENSG00000205181	341.844	-0.346761	0.096337	-3.59946	0.000318883	0.00467755
ENSG00000170312	420.835	0.368999	0.102562	3.59781	0.000320905	0.00470339
ENSG00000082126	145.357	0.473783	0.131702	3.5974	0.000321417	0.00470707
ENSG00000091986	117613	-0.248592	0.0691138	-3.59686	0.000322086	0.00471305
ENSG00000162599	373.932	-0.391523	0.108917	-3.59468	0.000324786	0.00474591
ENSG00000227544	9.62315	-0.527919	0.146863	-3.59463	0.000324857	0.00474591
ENSG00000174697	77.2062	-0.548016	0.152528	-3.59289	0.000327032	0.0047705
ENSG00000029993	2300.11	-0.269235	0.0749361	-3.59286	0.000327069	0.0047705
ENSG00000160072	445.732	0.354814	0.0987939	3.59145	0.000328839	0.00479244
ENSG00000169760	517.72	-0.356062	0.0991713	-3.59038	0.000330199	0.00480839
ENSG00000231426	154.518	0.484576	0.135027	3.58873	0.000332288	0.00483491
ENSG00000160570	657.959	0.287859	0.0802854	3.58544	0.000336511	0.00489241
ENSG00000109084	2001.72	0.260314	0.0726154	3.58484	0.000337289	0.00489978
ENSG00000251226	7.13914	0.475636	0.132713	3.58395	0.000338438	0.00491252
ENSG00000160957	199.154	0.424369	0.118509	3.58089	0.000342423	0.00496638
ENSG00000175155	710.895	-0.327851	0.0915747	-3.58015	0.000343398	0.00497651
ENSG00000106367	2114.88	0.222992	0.0622978	3.57945	0.000344322	0.0049859
ENSG00000163466	16235.6	0.147785	0.0412909	3.57912	0.000344753	0.00498814
ENSG00000152580	22.8294	-0.570041	0.159278	-3.57891	0.000345031	0.00498817
ENSG00000116774	7631.62	-0.184322	0.0515169	-3.57789	0.000346373	0.00500357
ENSG00000139436	1766.7	-0.203793	0.056967	-3.57739	0.000347041	0.00500921
ENSG00000224546	1912.13	-0.213141	0.0596223	-3.57485	0.000350426	0.00505402
ENSG00000005448	566.969	0.351591	0.0983707	3.57414	0.000351375	0.00506367
ENSG00000276855	185.242	-0.378508	0.106054	-3.56903	0.000358308	0.00515946
ENSG00000136982	91.0279	0.482864	0.135308	3.56862	0.000358866	0.00516338
ENSG00000185839	986.871	0.226668	0.0635225	3.56831	0.000359289	0.00516535
ENSG00000160460	52.7456	0.530592	0.148744	3.56714	0.000360901	0.00518441
ENSG00000112419	2450.79	-0.236453	0.066308	-3.56598	0.0003625	0.00520324
ENSG00000177150	848.076	0.261437	0.0733719	3.56318	0.000366389	0.00525487
ENSG00000162630	310.114	-0.450356	0.126429	-3.56212	0.000367871	0.00527194
ENSG00000204362	24.1789	0.570683	0.160254	3.56111	0.000369291	0.0052881
ENSG00000125965	356.941	-0.349243	0.0981572	-3.558	0.000373689	0.00534683
ENSG00000087842	442.443	-0.321272	0.0903108	-3.55741	0.000374534	0.00535468
ENSG00000184719	350.411	-0.322674	0.0907219	-3.55673	0.000375494	0.00536416
ENSG00000144724	5597.16	-0.176678	0.0496867	-3.55584	0.000376768	0.00537257
ENSG00000109790	7813.45	-0.226018	0.0635687	-3.5555	0.000377267	0.00537257
ENSG00000134470	231.097	-0.374694	0.105377	-3.55575	0.000376907	0.00537257
ENSG00000268388	463.033	-0.279679	0.0786612	-3.55549	0.000377273	0.00537257
ENSG00000204634	605.139	-0.319987	0.0900251	-3.55442	0.000378807	0.00538822
ENSG00000163145	12.7819	-0.52754	0.148422	-3.55431	0.000378969	0.00538822
ENSG00000140525	528.065	0.296949	0.08356	3.55372	0.00037983	0.00539621
ENSG00000085999	64.9378	0.531485	0.149711	3.55006	0.000385138	0.00546733
ENSG00000114770	1114.08	-0.221961	0.0625548	-3.54827	0.000387775	0.00550043
ENSG00000187446	5141.4	-0.167238	0.0471514	-3.54684	0.000389886	0.00552603
ENSG00000021826	972.959	-0.246648	0.069583	-3.54466	0.000393117	0.00556747
ENSG00000124749	78.3191	-0.560891	0.158386	-3.5413	0.000398159	0.00563445
ENSG00000176903	2242.01	0.190121	0.0536937	3.54085	0.000398841	0.00563968
ENSG00000171488	475.04	0.29798	0.084166	3.54038	0.000399544	0.0056452
ENSG00000168685	1496.8	0.356712	0.100763	3.5401	0.000399973	0.00564684
ENSG00000105722	1290.21	0.375313	0.106027	3.53979	0.000400445	0.00564909
ENSG00000155324	5274.59	0.217338	0.0614854	3.53479	0.000408096	0.00575253
ENSG00000185652	487.846	0.321625	0.0910024	3.53425	0.000408931	0.0057598
ENSG00000115020	2646.91	-0.210936	0.059699	-3.53332	0.000410369	0.00577555
ENSG00000167775	850.381	0.411237	0.116399	3.533	0.000410866	0.00577804
ENSG00000007968	37.4627	0.55839	0.158091	3.53207	0.000412314	0.00579389
ENSG00000246090	171.799	-0.36821	0.104254	-3.53185	0.000412665	0.00579432
ENSG00000117543	1048.97	-0.202515	0.0574055	-3.5278	0.00041903	0.00587911
ENSG00000189320	358.714	0.345982	0.0980906	3.52717	0.000420028	0.00588854
ENSG00000179967	1594.39	0.2997	0.0850102	3.52546	0.000422751	0.00591414
ENSG00000147119	150.541	0.473183	0.134221	3.5254	0.000422837	0.00591414
ENSG00000134531	13343.7	0.155686	0.0441597	3.52553	0.000422639	0.00591414
ENSG00000185565	20.6535	0.567135	0.161091	3.52059	0.000430586	0.00601787
ENSG00000136002	1108.03	0.328063	0.0932195	3.51925	0.000432761	0.00604027
ENSG00000261087	36.6746	-0.552585	0.15702	-3.5192	0.000432857	0.00604027
ENSG00000002586	12852.6	0.185614	0.0527672	3.51761	0.000435455	0.00607183
ENSG00000205765	3257.37	-0.204926	0.0582697	-3.51686	0.000436683	0.00608425
ENSG00000109099	6493.62	-0.253271	0.0720925	-3.51314	0.000442839	0.00616527
ENSG00000229644	2009.08	-0.28008	0.079734	-3.51268	0.000443611	0.00617126
ENSG00000115841	316.643	-0.394569	0.112356	-3.51179	0.000445106	0.00618728
ENSG00000106571	1958.12	-0.234661	0.0668537	-3.51007	0.000447985	0.00622251
ENSG00000153179	2567	-0.229652	0.0654507	-3.50878	0.000450168	0.00624803
ENSG00000134824	15371.2	-0.308115	0.0879383	-3.50376	0.000458734	0.00636203
ENSG00000143013	2648.03	-0.21829	0.0623522	-3.50091	0.000463664	0.00642053
ENSG00000145362	1281.41	-0.26863	0.0767295	-3.501	0.000463511	0.00642053
ENSG00000181192	739.449	-0.254644	0.0728445	-3.49572	0.000472786	0.00654183
ENSG00000136874	929.032	-0.285775	0.0817912	-3.49396	0.000475918	0.00658013
ENSG00000130827	3836.17	0.351801	0.100758	3.49155	0.000480226	0.00663462
ENSG00000206527	5031.01	-0.227246	0.0650911	-3.49119	0.00048087	0.00663843
ENSG00000253846	368.23	0.334052	0.0957098	3.49026	0.00048255	0.00665654
ENSG00000006607	3001.75	-0.198438	0.0569058	-3.48713	0.000488241	0.00672477
ENSG00000093072	470.486	-0.290581	0.0833275	-3.48722	0.000488075	0.00672477
ENSG00000146242	7143.9	0.163428	0.0468868	3.4856	0.000491041	0.00675818
ENSG00000134333	74653.9	0.240459	0.0690018	3.48482	0.000492468	0.00677265
ENSG00000197479	58.1768	-0.538868	0.154709	-3.48311	0.000495619	0.00681081
ENSG00000169026	52.7167	-0.54017	0.155142	-3.48177	0.000498108	0.00683979
ENSG00000188486	846.78	0.3761	0.108169	3.47697	0.000507119	0.00695824
ENSG00000140105	16225.4	-0.179911	0.0517744	-3.47491	0.000511027	0.00700654
ENSG00000259721	58.9937	0.505424	0.145501	3.47369	0.000513357	0.00703314
ENSG00000196781	931.906	-0.250267	0.0721789	-3.46732	0.000525684	0.00719657
ENSG00000118705	20174.8	0.16573	0.0478041	3.46686	0.00052657	0.00720324
ENSG00000235105	425.27	-0.275753	0.079582	-3.46502	0.000530188	0.00724725
ENSG00000186496	92.7417	-0.519756	0.15002	-3.46457	0.000531072	0.00725384
ENSG00000174938	2569.78	0.357911	0.103352	3.46303	0.000534124	0.00729001
ENSG00000091651	146.549	0.413678	0.119482	3.46226	0.00053566	0.00730545
ENSG00000173545	1539.39	0.186281	0.0538268	3.46074	0.000538688	0.0073412
ENSG00000237523	228.208	-0.356153	0.102998	-3.45788	0.000544451	0.00741414
ENSG00000206337	40.3847	-0.541603	0.156839	-3.45324	0.0005539	0.00753713
ENSG00000120733	3281.86	-0.179382	0.0519683	-3.45176	0.000556949	0.00757292
ENSG00000163249	1126.91	-0.294915	0.0855105	-3.44888	0.00056292	0.00764259
ENSG00000211584	990.911	-0.224278	0.0650289	-3.4489	0.000562884	0.00764259
ENSG00000011523	1342.77	-0.221286	0.0641722	-3.44831	0.000564102	0.00765289
ENSG00000137203	2493.32	-0.209123	0.0606695	-3.44692	0.00056702	0.0076867
ENSG00000145545	744.394	0.24544	0.0712486	3.44484	0.000571408	0.00774037
ENSG00000101109	2259.26	0.233032	0.0676769	3.4433	0.000574654	0.00777851
ENSG00000101310	2090.61	0.202818	0.0589101	3.44283	0.000575657	0.00778625
ENSG00000163110	4788.94	0.193845	0.056333	3.44105	0.000579453	0.00783173
ENSG00000145386	538.898	0.366904	0.106634	3.4408	0.000580006	0.00783334
ENSG00000183873	85.8441	-0.497624	0.144663	-3.4399	0.000581932	0.00785347
ENSG00000107130	3771.35	0.267111	0.0776812	3.43856	0.000584821	0.00788656
ENSG00000119280	15089	-0.265346	0.0772129	-3.43655	0.00058917	0.00792746
ENSG00000164237	2353.25	-0.226667	0.0659561	-3.43664	0.000588985	0.00792746
ENSG00000262576	393.079	-0.308337	0.0897224	-3.43656	0.000589151	0.00792746
ENSG00000182749	902.437	0.212422	0.0618236	3.43593	0.000590514	0.00793569
ENSG00000124177	3413.47	-0.183891	0.0535211	-3.43587	0.000590661	0.00793569
ENSG00000099284	648.788	-0.269736	0.0785686	-3.43312	0.000596669	0.00801044
ENSG00000118193	224.655	0.390608	0.113817	3.4319	0.000599368	0.00804071
ENSG00000001084	693.004	-0.262575	0.0765587	-3.42972	0.000604213	0.00809398
ENSG00000066739	2250.64	-0.205521	0.0599239	-3.42971	0.000604236	0.00809398
ENSG00000107159	21.6861	0.540729	0.157707	3.42869	0.000606503	0.00811833
ENSG00000145495	12602.9	-0.155655	0.0454297	-3.42628	0.000611906	0.00818459
ENSG00000225031	2075.29	-0.204571	0.0597158	-3.42575	0.000613098	0.00819446
ENSG00000197506	23.0644	0.551065	0.161211	3.41828	0.000630175	0.00841648
ENSG00000073464	91.9867	-0.46321	0.135634	-3.41514	0.000637492	0.00850791
ENSG00000131558	4341.95	-0.149854	0.0438898	-3.41433	0.000639401	0.00852708
ENSG00000164099	11791.3	-0.157053	0.0460136	-3.41318	0.000642106	0.00855192
ENSG00000171320	142.072	0.470147	0.137747	3.41313	0.000642211	0.00855192
ENSG00000170113	2752.3	0.166227	0.0487135	3.41233	0.000644095	0.00857069
ENSG00000187608	339.803	0.498023	0.146098	3.40883	0.000652418	0.00867504
ENSG00000153721	850.649	-0.259479	0.0761864	-3.40584	0.00065961	0.00876376
ENSG00000065320	44.3359	-0.548287	0.160993	-3.40565	0.000660061	0.00876376
ENSG00000127946	367.784	0.35214	0.103423	3.40485	0.000662014	0.00878323
ENSG00000147894	202.293	-0.346576	0.101797	-3.40457	0.000662671	0.0087855
ENSG00000100092	157.081	0.437954	0.128675	3.40355	0.00066515	0.0088119
ENSG00000168679	1406.54	-0.207105	0.0608691	-3.40246	0.000667825	0.00884085
ENSG00000047346	1259.87	-0.249595	0.0733699	-3.40188	0.000669249	0.0088532
ENSG00000079337	82.7655	0.486174	0.14293	3.40147	0.000670235	0.00885976
ENSG00000139508	603.827	-0.288149	0.0847312	-3.40074	0.000672027	0.00887694
ENSG00000230928	85.8025	0.512127	0.150618	3.40016	0.000673455	0.00888931
ENSG00000106617	1232.83	-0.193472	0.0569049	-3.39991	0.000674081	0.00889108
ENSG00000176619	3492.38	0.36856	0.10841	3.39968	0.000674655	0.00889215
ENSG00000081923	7648.8	0.189789	0.0558415	3.39871	0.000677036	0.00891702
ENSG00000167397	710.858	0.261028	0.0768433	3.39689	0.00068157	0.0089702
ENSG00000140950	1557.46	0.188576	0.0555211	3.39647	0.000682622	0.0089775
ENSG00000104341	4087.03	-0.213451	0.0628915	-3.39395	0.000688916	0.00905368
ENSG00000169126	808.248	0.285451	0.0841855	3.39073	0.00069706	0.00915405
ENSG00000186918	2882.61	0.264633	0.0780526	3.39044	0.0006978	0.00915711
ENSG00000185305	826.383	-0.277343	0.0818261	-3.38942	0.000700395	0.00918449
ENSG00000198825	1221.06	0.228366	0.0674485	3.38578	0.00070977	0.00930067
ENSG00000082213	1607.62	-0.234317	0.0693208	-3.38018	0.000724376	0.00948517
ENSG00000075711	5945.34	-0.182659	0.0540518	-3.37934	0.00072661	0.00950754
ENSG00000162849	3630.3	-0.199825	0.059158	-3.37781	0.000730646	0.00954651
ENSG00000139641	11913.9	0.173893	0.051479	3.37795	0.000730287	0.00954651
ENSG00000182674	19.3068	-0.541194	0.160256	-3.37705	0.000732666	0.00956598
ENSG00000132341	11008.6	0.150322	0.0445187	3.37661	0.00073385	0.00957452
ENSG00000232499	635.583	0.241188	0.0714481	3.37571	0.000736259	0.00959901
ENSG00000110841	4189.38	0.237219	0.0702846	3.37512	0.000737842	0.00961271
ENSG00000141198	959.378	-0.221269	0.0655735	-3.37437	0.000739857	0.00963202
ENSG00000253305	152.382	-0.438869	0.13013	-3.37255	0.000744749	0.00968871
ENSG00000182272	586.115	0.429636	0.127402	3.37228	0.000745492	0.0096914
ENSG00000174748	21901.3	-0.126107	0.0373999	-3.37184	0.000746677	0.00969982
ENSG00000214900	49.7983	0.504035	0.149595	3.36932	0.000753545	0.009782
ENSG00000153814	1651.42	-0.311502	0.0924749	-3.3685	0.000755773	0.00980388
ENSG00000088367	2449.27	-0.215804	0.064149	-3.36411	0.000767922	0.00995432
ENSG00000151491	2806.03	0.173434	0.0515618	3.3636	0.000769317	0.00996525
ENSG00000183283	6569.77	-0.165067	0.0490808	-3.36317	0.000770524	0.00997372
ENSG00000140092	19772	-0.187688	0.0558677	-3.35952	0.000780786	0.0100993
ENSG00000173548	3417.22	-0.172844	0.0514655	-3.35845	0.000783815	0.0101312
ENSG00000111817	4710.27	0.15419	0.045919	3.35788	0.000785434	0.0101449
ENSG00000142731	170.591	0.459388	0.136846	3.35697	0.000788015	0.0101637
ENSG00000162073	84.8044	0.478514	0.142537	3.35713	0.000787561	0.0101637
ENSG00000175130	2337.11	-0.26736	0.0796992	-3.35461	0.00079477	0.0102387
ENSG00000177469	59873.4	0.192627	0.0574229	3.35454	0.000794966	0.0102387
ENSG00000136144	1273.83	-0.225413	0.0672005	-3.35433	0.000795565	0.0102391
ENSG00000115310	30718.2	0.148254	0.0442077	3.35357	0.000797748	0.0102599
ENSG00000170145	2519.49	-0.168497	0.0502659	-3.35211	0.000801984	0.0103071
ENSG00000137507	192.692	-0.377619	0.112694	-3.35085	0.000805635	0.0103466
ENSG00000146112	4755.33	0.197796	0.059038	3.35032	0.000807176	0.010359
ENSG00000071967	25600.1	-0.259803	0.0775593	-3.34974	0.000808881	0.0103736
ENSG00000170498	40.7257	0.532443	0.158989	3.34894	0.000811225	0.0103962
ENSG00000158286	554.699	-0.384757	0.114943	-3.34737	0.000815821	0.0104408
ENSG00000168477	281.171	-0.474439	0.141736	-3.34736	0.000815861	0.0104408
ENSG00000187068	128.344	-0.40108	0.119835	-3.34693	0.000817104	0.0104493
ENSG00000141068	864.624	-0.267832	0.0800734	-3.34483	0.000823331	0.0105215
ENSG00000109680	1008.08	0.296846	0.0887537	3.3446	0.000824003	0.0105226
ENSG00000187079	22595.4	-0.149358	0.0446853	-3.34244	0.000830462	0.0105976
ENSG00000159023	1976.85	-0.24975	0.0747288	-3.34209	0.000831501	0.0106034
ENSG00000100739	126.742	0.429998	0.128691	3.34132	0.000833806	0.0106253
ENSG00000246273	2493.55	-0.224965	0.0674074	-3.33739	0.000845689	0.0107691
ENSG00000198142	2198.74	0.182148	0.0545892	3.33671	0.000847773	0.010788
ENSG00000114867	22849.5	0.154209	0.0462208	3.33636	0.000848821	0.0107938
ENSG00000084070	1402.06	0.203943	0.0611648	3.33432	0.000855089	0.0108658
ENSG00000185972	56.4886	0.514404	0.15431	3.33356	0.000857413	0.0108877
ENSG00000070495	1054.78	0.235733	0.0707446	3.33217	0.000861707	0.0109345
ENSG00000120162	17.6218	-0.521314	0.156505	-3.33097	0.000865452	0.0109658
ENSG00000177239	4458.83	0.269667	0.0809619	3.33079	0.000865989	0.0109658
ENSG00000176171	7091.61	0.281789	0.0845947	3.33105	0.000865194	0.0109658
ENSG00000078808	9192.37	0.26172	0.0786272	3.32861	0.000872797	0.0110442
ENSG00000106665	2765.59	0.35009	0.105201	3.32783	0.000875246	0.0110674
ENSG00000183684	1012.64	0.25587	0.0769058	3.32705	0.000877698	0.0110907
ENSG00000164440	62.3424	-0.522418	0.157088	-3.32564	0.000882154	0.0111392
ENSG00000213853	2125.67	-0.194144	0.0584123	-3.32367	0.000888399	0.0112102
ENSG00000196139	13.3571	-0.502865	0.15133	-3.32296	0.000890665	0.011231
ENSG00000124145	16652.8	0.25349	0.0762918	3.32264	0.000891684	0.011236
ENSG00000227051	4844	-0.233067	0.0701572	-3.32206	0.000893542	0.0112461
ENSG00000125520	1254.76	0.359926	0.108346	3.322	0.000893733	0.0112461
ENSG00000178917	107.534	-0.441696	0.132981	-3.3215	0.000895358	0.0112587
ENSG00000168306	323.496	-0.307459	0.0925752	-3.32118	0.000896378	0.0112637
ENSG00000120594	314.105	0.332703	0.100186	3.32084	0.000897462	0.0112694
ENSG00000106004	106.105	0.42171	0.127009	3.32031	0.000899176	0.0112831
ENSG00000135469	263.447	-0.33347	0.100462	-3.31936	0.000902249	0.0113138
ENSG00000163399	10767.5	-0.139149	0.0419368	-3.31806	0.000906451	0.0113586
ENSG00000144959	783.17	0.274265	0.082687	3.3169	0.000910227	0.011398
ENSG00000157168	709.236	0.312859	0.0943447	3.31613	0.000912745	0.0114216
ENSG00000185022	1349.77	0.33669	0.101593	3.31412	0.000919325	0.011496
ENSG00000185432	102.791	-0.454872	0.137303	-3.31289	0.000923359	0.0115385
ENSG00000077152	197.836	0.367281	0.110896	3.31193	0.000926548	0.0115543
ENSG00000118523	24838.6	0.259181	0.0782529	3.3121	0.000925999	0.0115543
ENSG00000149575	9.66341	0.45457	0.137245	3.31211	0.000925953	0.0115543
ENSG00000124249	67.9265	0.4973	0.150198	3.31095	0.000929787	0.0115867
ENSG00000064933	1280.42	-0.255617	0.0772789	-3.30772	0.000940587	0.0117132
ENSG00000112186	2189.79	-0.209826	0.0634753	-3.30563	0.000947636	0.0117929
ENSG00000116711	86.6627	0.463269	0.140253	3.30309	0.00095625	0.0118919
ENSG00000168078	271.317	0.409572	0.124007	3.30282	0.000957165	0.0118951
ENSG00000283674	6.79897	0.424797	0.128631	3.30244	0.000958463	0.011903
ENSG00000253368	2709.67	0.173858	0.0527126	3.29822	0.000973003	0.012067
ENSG00000108984	427.237	-0.382926	0.116096	-3.29835	0.000972555	0.012067
ENSG00000119912	2586.47	-0.172621	0.0523686	-3.29628	0.00097975	0.0121423
ENSG00000106086	1624.15	-0.1963	0.0595918	-3.29408	0.000987461	0.0122295
ENSG00000198759	19.7839	-0.495592	0.150522	-3.29248	0.000993081	0.0122907
ENSG00000142949	17037.7	0.276143	0.0839265	3.2903	0.00100082	0.012378
ENSG00000144354	341.249	0.280659	0.0853078	3.28995	0.00100205	0.0123846
ENSG00000251615	102.386	-0.43793	0.13313	-3.28948	0.00100372	0.0123969
ENSG00000133657	20642.8	-0.17577	0.0534484	-3.28859	0.00100689	0.0124258
ENSG00000080573	2764.9	0.242515	0.0737478	3.28844	0.00100744	0.0124258
ENSG00000171314	3341.26	0.167098	0.0508188	3.28812	0.00100858	0.0124301
ENSG00000015475	1485.71	0.22035	0.0670172	3.28796	0.00100916	0.0124301
ENSG00000183615	189.212	-0.394814	0.120087	-3.28774	0.00100995	0.0124313
ENSG00000151117	83.1095	-0.44584	0.135651	-3.28667	0.00101379	0.01247
ENSG00000099331	4078.91	0.271153	0.082533	3.28539	0.00101841	0.0125183
ENSG00000150764	1893.71	-0.228551	0.0695992	-3.28382	0.00102411	0.0125798
ENSG00000164251	58.1285	0.516311	0.157289	3.28257	0.00102867	0.0126272
ENSG00000149485	6687.34	-0.190116	0.0579265	-3.28203	0.00103064	0.0126428
ENSG00000161921	291.932	-0.317648	0.0967951	-3.28166	0.00103199	0.0126485
ENSG00000101265	1458.44	-0.2858	0.0870939	-3.28152	0.00103251	0.0126485
ENSG00000136826	1878.23	0.218094	0.0665064	3.2793	0.00104066	0.0127398
ENSG00000007237	263.951	-0.322019	0.0982155	-3.27869	0.00104288	0.0127584
ENSG00000092470	270.541	0.345179	0.10535	3.27651	0.001051	0.0128489
ENSG00000157388	20.3519	-0.518074	0.158269	-3.27338	0.0010627	0.0129832
ENSG00000157540	2871.84	-0.155311	0.0474659	-3.27206	0.00106769	0.0130353
ENSG00000172728	610.662	-0.2423	0.0740574	-3.27178	0.00106872	0.0130391
ENSG00000073350	28.7035	-0.50624	0.154826	-3.26973	0.00107649	0.013125
ENSG00000224470	2642.75	-0.16031	0.0490557	-3.26793	0.00108338	0.0132001
ENSG00000165675	677.395	-0.266612	0.081614	-3.26674	0.00108794	0.0132468
ENSG00000157601	517.631	-0.292331	0.0895173	-3.26564	0.00109217	0.0132893
ENSG00000109107	1108.16	0.263981	0.0808442	3.26531	0.00109345	0.013296
ENSG00000265681	202.161	0.408266	0.125063	3.26448	0.00109666	0.013326
ENSG00000135914	55.4582	-0.51363	0.157366	-3.26393	0.0010988	0.013343
ENSG00000267279	26.3368	0.506595	0.155227	3.26358	0.00110014	0.0133503
ENSG00000127528	395.869	0.422107	0.129361	3.26301	0.00110237	0.0133684
ENSG00000116883	298.023	0.29413	0.0902205	3.26012	0.00111364	0.0134661
ENSG00000170365	455.783	-0.261115	0.0800912	-3.26021	0.00111328	0.0134661
ENSG00000169258	165.155	0.393594	0.120717	3.26046	0.00111231	0.0134661
ENSG00000054967	108.876	0.391457	0.120079	3.25999	0.00111416	0.0134661
ENSG00000255399	3356.79	-0.197947	0.0607077	-3.26066	0.00111153	0.0134661
ENSG00000166780	606.376	-0.242128	0.0742832	-3.25953	0.00111597	0.013479
ENSG00000177425	3665.9	-0.19664	0.0603448	-3.25861	0.00111961	0.0135139
ENSG00000070018	3349.57	-0.239685	0.07361	-3.25614	0.00112937	0.0136226
ENSG00000163479	8828.85	0.163856	0.0503571	3.25389	0.00113838	0.0137129
ENSG00000274307	23.8303	0.521574	0.160287	3.254	0.00113791	0.0137129
ENSG00000171509	19.4155	0.479812	0.147754	3.24737	0.00116475	0.0140213
ENSG00000116863	1208.35	0.257449	0.0792928	3.24681	0.00116707	0.0140398
ENSG00000165169	1778.13	-0.260673	0.0803064	-3.24598	0.00117047	0.0140632
ENSG00000271614	59.407	0.480947	0.148177	3.24577	0.00117135	0.0140632
ENSG00000170425	470.232	0.272067	0.083821	3.24581	0.00117118	0.0140632
ENSG00000168621	283.5	0.318379	0.0981023	3.24538	0.00117294	0.0140729
ENSG00000170214	19.5203	-0.519229	0.160173	-3.24168	0.00118827	0.0142474
ENSG00000135723	955.576	0.272535	0.0841155	3.24001	0.00119525	0.0143216
ENSG00000133110	45.4562	0.51534	0.159158	3.23792	0.00120404	0.0144173
ENSG00000090020	3734.54	0.250069	0.0772548	3.23694	0.00120821	0.014454
ENSG00000166803	71.1927	0.465016	0.143665	3.23682	0.00120871	0.014454
ENSG00000157240	1117.64	0.205021	0.0633638	3.23561	0.00121383	0.0145057
ENSG00000137801	582957	0.16252	0.0502652	3.23324	0.00122393	0.0146167
ENSG00000041353	166.851	0.368091	0.113922	3.23108	0.00123322	0.0147179
ENSG00000100612	1639.56	0.17504	0.0542056	3.2292	0.00124139	0.0148056
ENSG00000114423	1380.96	-0.260823	0.0807864	-3.22855	0.00124418	0.0148291
ENSG00000106560	21.8864	-0.510483	0.158264	-3.22551	0.00125749	0.014968
ENSG00000173457	1153.93	0.317323	0.0983788	3.22552	0.00125745	0.014968
ENSG00000214826	30.7899	0.520308	0.161345	3.22482	0.00126052	0.0149942
ENSG00000186792	249.413	0.344392	0.10691	3.22131	0.00127606	0.0151666
ENSG00000130340	8841.93	-0.148265	0.0460283	-3.22117	0.00127669	0.0151666
ENSG00000157600	937.134	-0.232862	0.0723164	-3.22004	0.00128173	0.0152064
ENSG00000166831	73.3023	-0.479257	0.148832	-3.22012	0.00128137	0.0152064
ENSG00000147535	1272.1	0.17186	0.0533906	3.21891	0.00128678	0.0152563
ENSG00000206262	32.3282	0.516127	0.160379	3.21817	0.00129013	0.0152674
ENSG00000065923	2297.26	0.183151	0.0569122	3.21814	0.00129025	0.0152674
ENSG00000142173	102915	0.37901	0.117768	3.21829	0.00128958	0.0152674
ENSG00000137267	2249.99	0.273482	0.0850096	3.21708	0.00129503	0.0153139
ENSG00000214357	139.461	0.415299	0.129104	3.21677	0.00129642	0.0153195
ENSG00000260337	17.0335	-0.515133	0.160148	-3.2166	0.0012972	0.0153195
ENSG00000122884	21065.9	0.26279	0.0817091	3.21616	0.00129917	0.0153325
ENSG00000160013	395.672	0.44995	0.139911	3.21598	0.00129999	0.0153325
ENSG00000188153	555.701	0.279163	0.0868447	3.21451	0.00130669	0.0154013
ENSG00000198053	7067.66	0.251288	0.0781775	3.21432	0.00130754	0.0154013
ENSG00000280219	51.3201	-0.501711	0.156137	-3.21328	0.00131229	0.0154472
ENSG00000104361	2907.44	-0.275547	0.0857874	-3.21197	0.00131829	0.0154976
ENSG00000171873	182.379	0.461553	0.143695	3.21204	0.00131797	0.0154976
ENSG00000176542	943.749	-0.205117	0.0638666	-3.21165	0.00131975	0.0155047
ENSG00000144485	38.0894	-0.517341	0.16111	-3.2111	0.00132226	0.0155241
ENSG00000145912	564.07	0.330158	0.102865	3.20963	0.00132907	0.015594
ENSG00000143344	1334.77	-0.307931	0.0959647	-3.2088	0.00133291	0.0156288
ENSG00000185963	2372.91	0.171548	0.0534761	3.20793	0.00133695	0.015666
ENSG00000083223	3736.12	-0.208397	0.0649772	-3.20723	0.00134019	0.0156938
ENSG00000113721	23103.4	-0.222651	0.0694297	-3.20685	0.00134196	0.0157043
ENSG00000156486	92.2654	-0.481895	0.150364	-3.20487	0.00135125	0.0157943
ENSG00000089327	4740.24	0.256327	0.0799812	3.20484	0.00135139	0.0157943
ENSG00000169908	29.8105	0.517037	0.161346	3.20452	0.00135286	0.0158012
ENSG00000247572	180.849	-0.353881	0.110452	-3.20394	0.00135563	0.0158232
ENSG00000119684	497.725	0.243878	0.0761587	3.20223	0.00136369	0.0159071
ENSG00000213290	278.658	0.34731	0.108471	3.20187	0.0013654	0.0159167
ENSG00000182263	367.584	-0.326331	0.101933	-3.20143	0.00136749	0.0159308
ENSG00000213025	376.468	0.262361	0.0819842	3.20014	0.0013736	0.0159849
ENSG00000170222	417.654	-0.305193	0.0953705	-3.20008	0.0013739	0.0159849
ENSG00000120262	106.143	-0.43867	0.137109	-3.19942	0.00137703	0.0160031
ENSG00000197892	466.096	-0.337998	0.105651	-3.19919	0.00137812	0.0160031
ENSG00000129480	736.181	-0.297126	0.0928725	-3.19929	0.00137766	0.0160031
ENSG00000102901	889.943	0.229352	0.0717014	3.19871	0.00138042	0.0160195
ENSG00000188766	260.972	0.352178	0.110116	3.19825	0.00138265	0.0160351
ENSG00000107295	187.456	0.346528	0.108365	3.19778	0.0013849	0.0160507
ENSG00000152939	190.696	-0.355948	0.111327	-3.19733	0.00138707	0.0160657
ENSG00000127311	235.838	-0.343973	0.107621	-3.19616	0.00139272	0.0161207
ENSG00000160014	10277.6	0.188034	0.0588387	3.19576	0.00139462	0.0161324
ENSG00000121152	165.815	0.433906	0.135786	3.19552	0.00139581	0.0161358
ENSG00000124733	1775.49	0.240011	0.0751442	3.19401	0.00140313	0.0161996
ENSG00000107175	2699.66	0.187093	0.0585748	3.19409	0.00140275	0.0161996
ENSG00000163558	2777.53	-0.251254	0.0786714	-3.19371	0.00140456	0.0162059
ENSG00000198795	1538.97	0.195767	0.0613477	3.1911	0.00141731	0.0163425
ENSG00000196935	2771.39	0.184906	0.0579726	3.18954	0.00142501	0.0164208
ENSG00000115226	338.166	0.285956	0.0896709	3.18895	0.00142792	0.0164439
ENSG00000178531	124.392	0.397206	0.12457	3.18863	0.0014295	0.0164515
ENSG00000105738	975.188	0.3469	0.108809	3.18816	0.0014318	0.0164675
ENSG00000020633	161.501	-0.357139	0.112259	-3.18139	0.00146573	0.016847
ENSG00000140262	5258.63	-0.169088	0.053153	-3.18116	0.00146685	0.0168492
ENSG00000145526	7.37324	0.416022	0.130814	3.18027	0.00147138	0.0168905
ENSG00000154822	333.791	-0.313267	0.0985578	-3.17851	0.00148033	0.0169825
ENSG00000163788	1592.17	-0.20306	0.0638917	-3.17819	0.00148196	0.0169903
ENSG00000123096	936.507	-0.261758	0.0823665	-3.17796	0.00148315	0.0169932
ENSG00000180611	801.015	0.271428	0.0854157	3.17773	0.00148434	0.016996
ENSG00000112425	335.947	-0.309558	0.0974496	-3.1766	0.00149015	0.0170517
ENSG00000276603	8.81588	-0.441491	0.139043	-3.17521	0.00149729	0.0171226
ENSG00000115267	343.74	-0.293878	0.0925628	-3.1749	0.00149887	0.0171298
ENSG00000077044	1371.11	-0.216577	0.0682215	-3.17461	0.00150036	0.017136
ENSG00000167778	1938.68	0.230064	0.0725091	3.1729	0.00150927	0.0172268
ENSG00000121316	115.134	-0.381784	0.120425	-3.17031	0.00152276	0.0173698
ENSG00000155090	2261.31	0.217897	0.0687476	3.16952	0.00152692	0.0174063
ENSG00000132639	17.4859	-0.493324	0.155683	-3.16877	0.00153085	0.0174401
ENSG00000196932	35.5114	-0.510808	0.161346	-3.16591	0.00154598	0.0176013
ENSG00000164087	220.292	0.349663	0.110482	3.1649	0.00155138	0.0176295
ENSG00000198945	808.216	-0.334494	0.105683	-3.16507	0.00155047	0.0176295
ENSG00000079102	1687.94	-0.238477	0.0753496	-3.16493	0.00155118	0.0176295
ENSG00000133106	168.615	-0.371137	0.117284	-3.16443	0.00155387	0.0176379
ENSG00000141580	3513.82	0.162086	0.0512219	3.16439	0.00155408	0.0176379
ENSG00000162433	2934.55	0.325687	0.102929	3.1642	0.00155508	0.0176382
ENSG00000165209	359.185	-0.299665	0.0947304	-3.16335	0.00155964	0.0176789
ENSG00000135148	1635.58	-0.169324	0.053566	-3.16105	0.00157204	0.0178082
ENSG00000118961	940.61	-0.229875	0.0727857	-3.15824	0.00158727	0.0179583
ENSG00000146414	760.857	-0.22367	0.0708185	-3.15836	0.00158658	0.0179583
ENSG00000125538	162.611	-0.390803	0.123753	-3.15793	0.00158893	0.0179658
ENSG00000110811	3471.03	0.322779	0.102325	3.15444	0.00160807	0.0181708
ENSG00000213866	3639.56	0.163503	0.0518379	3.15412	0.00160985	0.0181795
ENSG00000143198	3070.72	0.187139	0.0593617	3.15253	0.00161864	0.018256
ENSG00000124126	202.541	-0.363067	0.115162	-3.15267	0.00161785	0.018256
ENSG00000274370	151.59	-0.403776	0.128131	-3.15127	0.00162561	0.0183231
ENSG00000155463	3410.17	-0.179469	0.0569924	-3.14899	0.00163836	0.0184553
ENSG00000145283	19.1442	-0.492429	0.156394	-3.14864	0.00164031	0.0184658
ENSG00000169991	1296.5	0.198063	0.0630096	3.14337	0.00167013	0.0187885
ENSG00000175183	1028.86	0.198746	0.0632304	3.14321	0.00167106	0.0187885
ENSG00000143850	2012.72	0.185664	0.0591046	3.14128	0.00168214	0.0189013
ENSG00000158856	165.466	-0.342599	0.109075	-3.14094	0.00168404	0.0189109
ENSG00000179855	17.7026	-0.49994	0.159252	-3.13929	0.00169357	0.0189943
ENSG00000213683	140.704	0.357936	0.114013	3.13942	0.00169283	0.0189943
ENSG00000184164	1568.32	0.304515	0.0970085	3.13906	0.00169491	0.0189975
ENSG00000157456	353.81	0.331412	0.105596	3.1385	0.00169815	0.019022
ENSG00000163545	449.098	0.302339	0.0963397	3.13826	0.00169955	0.0190259
ENSG00000143162	4192.07	-0.241278	0.0768963	-3.13771	0.00170272	0.0190496
ENSG00000197948	1269.39	0.22132	0.0705428	3.13739	0.00170461	0.019059
ENSG00000198805	429.515	0.276112	0.0880126	3.13719	0.00170575	0.0190599
ENSG00000183346	67.1551	-0.470234	0.149933	-3.1363	0.00171092	0.0191058
ENSG00000120725	1841.83	0.262441	0.0837185	3.1348	0.00171972	0.0191922
ENSG00000078269	2503.1	-0.217503	0.0694742	-3.1307	0.00174388	0.0194498
ENSG00000129911	476.907	0.378688	0.120996	3.12976	0.00174952	0.0195006
ENSG00000123473	353.232	0.328691	0.105078	3.12806	0.00175964	0.0196014
ENSG00000129675	751.226	-0.25468	0.0814741	-3.1259	0.00177261	0.0197337
ENSG00000116478	4141.74	-0.171919	0.055029	-3.12415	0.00178319	0.0198392
ENSG00000158769	45.1177	-0.480767	0.153934	-3.1232	0.00178894	0.0198787
ENSG00000176915	3070.1	0.161677	0.0517662	3.12322	0.00178882	0.0198787
ENSG00000162407	3234.36	-0.244934	0.0784756	-3.12116	0.00180143	0.0199561
ENSG00000159399	4794.47	0.187405	0.0600405	3.12131	0.00180048	0.0199561
ENSG00000148248	18171.8	0.187606	0.0601054	3.12129	0.00180061	0.0199561
ENSG00000130377	10.7485	-0.465814	0.149227	-3.12151	0.00179929	0.0199561
ENSG00000197019	499.6	0.287198	0.0919971	3.12182	0.00179738	0.0199561
ENSG00000169032	2371.3	0.16755	0.053701	3.12005	0.00180819	0.0200187
ENSG00000169902	851.771	-0.275999	0.0884876	-3.11907	0.00181423	0.0200732
ENSG00000177830	3742.48	0.295115	0.0946306	3.1186	0.00181711	0.0200928
ENSG00000270504	728.477	-0.228868	0.0734295	-3.11684	0.00182799	0.0202007
ENSG00000112941	1352.95	0.179029	0.0574605	3.11568	0.00183521	0.0202681
ENSG00000272695	583.634	0.271277	0.0871249	3.11365	0.00184786	0.0203954
ENSG00000102879	28.4759	0.500146	0.160886	3.1087	0.00187915	0.0207281
ENSG00000212747	992.103	0.198539	0.0639437	3.1049	0.00190342	0.0209829
ENSG00000102678	117.515	0.444498	0.143296	3.10196	0.00192245	0.0211798
ENSG00000177084	852.619	0.261995	0.084489	3.10093	0.00192912	0.0212403
ENSG00000114902	2850.81	0.143087	0.0461693	3.09917	0.00194062	0.0213539
ENSG00000117308	646.866	0.324205	0.104783	3.09407	0.00197428	0.0217111
ENSG00000169814	698.732	0.214171	0.0693063	3.0902	0.0020002	0.0219783
ENSG00000160191	89.1138	-0.457291	0.147987	-3.09008	0.00200101	0.0219783
ENSG00000136997	3791.56	0.202409	0.0655354	3.08855	0.00201137	0.0220786
ENSG00000111247	162.83	0.387293	0.125421	3.08794	0.0020155	0.0221105
ENSG00000219507	9549.17	0.215221	0.0697253	3.08669	0.00202396	0.0221898
ENSG00000151725	277.298	0.363126	0.117716	3.08477	0.00203708	0.0223201
ENSG00000197299	98.2392	0.429904	0.1394	3.08396	0.00204268	0.0223679
ENSG00000087460	36881.8	0.15379	0.0498837	3.08297	0.00204943	0.0224282
ENSG00000136531	29.6178	0.493608	0.160167	3.08184	0.00205725	0.0224866
ENSG00000122335	1004.68	-0.224256	0.072766	-3.08187	0.00205701	0.0224866
ENSG00000099250	10855.6	-0.200328	0.0650115	-3.08142	0.00206016	0.0225042
ENSG00000165731	49.5724	0.479966	0.15577	3.08125	0.00206136	0.0225042
ENSG00000182179	1471.87	-0.273362	0.0887333	-3.08072	0.00206504	0.0225308
ENSG00000069667	678.798	0.333726	0.108474	3.07656	0.00209406	0.0228336
ENSG00000010270	1676.04	-0.208578	0.0678041	-3.07618	0.00209673	0.0228489
ENSG00000169087	191.75	-0.330828	0.107569	-3.07551	0.00210144	0.0228865
ENSG00000065675	34.4533	-0.49566	0.161247	-3.07392	0.00211268	0.022995
ENSG00000225484	717.834	-0.258183	0.0840157	-3.07303	0.002119	0.0230498
ENSG00000156804	744.883	-0.378685	0.123412	-3.06845	0.00215169	0.0233914
ENSG00000129003	3486.59	-0.222472	0.0725138	-3.06799	0.00215504	0.0234137
ENSG00000145623	14011.3	-0.122741	0.0400104	-3.06772	0.00215696	0.0234205
ENSG00000176692	89.0519	0.43834	0.142912	3.0672	0.00216076	0.0234476
ENSG00000138185	117.983	-0.45192	0.147355	-3.06689	0.00216299	0.0234577
ENSG00000011465	41404.4	-0.280568	0.0914987	-3.06636	0.00216681	0.0234851
ENSG00000101210	3002.39	-0.340483	0.111127	-3.0639	0.00218472	0.023665
ENSG00000179456	710.419	-0.224102	0.0731698	-3.06277	0.00219299	0.0237404
ENSG00000155269	59.8607	-0.448979	0.14667	-3.06116	0.00220482	0.0238541
ENSG00000174080	3091.34	0.157551	0.0514714	3.06095	0.00220638	0.0238566
ENSG00000177875	39.7562	-0.483265	0.157908	-3.06043	0.00221019	0.0238835
ENSG00000109220	792.073	0.241765	0.0790291	3.05919	0.00221937	0.0239549
ENSG00000166394	788.573	0.212989	0.069623	3.05918	0.00221944	0.0239549
ENSG00000092853	198.516	0.410799	0.134294	3.05895	0.00222114	0.0239588
ENSG00000126561	702.604	-0.23348	0.076363	-3.0575	0.00223188	0.0240604
ENSG00000059804	5128.87	0.187459	0.0613253	3.05679	0.00223721	0.0241034
ENSG00000166340	9724.42	-0.125589	0.0410935	-3.05618	0.00224175	0.0241379
ENSG00000170006	338.61	-0.251428	0.0823667	-3.05254	0.0022691	0.0244179
ENSG00000197106	51.0338	0.466699	0.152963	3.05105	0.0022804	0.0245248
ENSG00000122707	15583.7	0.170379	0.0558557	3.05034	0.00228586	0.0245689
ENSG00000141084	1206.04	-0.183851	0.0603638	-3.04571	0.0023213	0.024935
ENSG00000144655	635.227	0.308126	0.101205	3.04456	0.00233023	0.025016
ENSG00000125817	3208.59	0.246693	0.0810468	3.04384	0.00233583	0.0250464
ENSG00000105321	584.055	0.316534	0.103988	3.04396	0.00233485	0.0250464
ENSG00000115993	5388.56	-0.174681	0.0574136	-3.0425	0.00234625	0.0251282
ENSG00000075415	18170.4	-0.121617	0.0399709	-3.04264	0.00234514	0.0251282
ENSG00000102172	1046.16	0.259653	0.0853707	3.04148	0.00235421	0.0251986
ENSG00000135617	231.939	0.357383	0.117522	3.041	0.00235797	0.0252089
ENSG00000128050	5353.95	0.20073	0.0660065	3.04106	0.00235747	0.0252089
ENSG00000235859	47.5729	-0.474781	0.156154	-3.04047	0.00236208	0.025223
ENSG00000265579	82.6081	-0.429667	0.14131	-3.0406	0.00236104	0.025223
ENSG00000271709	17.4269	0.481638	0.158462	3.03946	0.00237001	0.025281
ENSG00000227199	19.0431	-0.486834	0.160173	-3.03942	0.00237031	0.025281
ENSG00000095752	365.048	0.401166	0.132249	3.03342	0.00241801	0.0257745
ENSG00000186417	95.4121	-0.412108	0.135921	-3.03197	0.00242961	0.0258829
ENSG00000128710	176.41	0.365791	0.120659	3.03162	0.00243248	0.0258846
ENSG00000071242	9049.74	-0.159176	0.0525055	-3.0316	0.00243264	0.0258846
ENSG00000076770	57.2346	-0.449107	0.148233	-3.02973	0.00244771	0.0260175
ENSG00000229373	25.7689	0.487058	0.160761	3.02969	0.00244801	0.0260175
ENSG00000100865	1000.23	0.200682	0.0662599	3.02872	0.00245595	0.0260865
ENSG00000171533	1297.84	-0.202117	0.0667765	-3.02677	0.00247186	0.02624
ENSG00000253910	356.273	-0.282729	0.0934289	-3.02614	0.00247696	0.0262788
ENSG00000178538	19.3161	-0.434873	0.143727	-3.02569	0.00248069	0.0263029
ENSG00000187699	54.3346	-0.453715	0.150036	-3.02404	0.00249423	0.0264309
ENSG00000102007	3208.13	0.126711	0.041961	3.01973	0.00253003	0.0267946
ENSG00000142541	9291.47	-0.175066	0.0579845	-3.01919	0.00253451	0.0268262
ENSG00000224411	4074.35	0.139168	0.0460989	3.01889	0.00253703	0.0268372
ENSG00000111913	2660.55	-0.209209	0.0693937	-3.01481	0.00257142	0.0271851
ENSG00000143867	506.681	0.396737	0.131643	3.01373	0.00258055	0.0272657
ENSG00000054148	1681.21	0.301683	0.100191	3.01107	0.0026033	0.02749
ENSG00000014138	347.225	0.302138	0.100364	3.01042	0.00260889	0.0275328
ENSG00000102445	235.433	-0.296784	0.0986318	-3.00901	0.00262099	0.0276444
ENSG00000130147	8839.03	0.177397	0.0589598	3.00877	0.00262305	0.02765
ENSG00000206149	265.56	-0.315121	0.104744	-3.0085	0.00262542	0.0276588
ENSG00000221817	192.673	-0.305209	0.101488	-3.00734	0.00263541	0.0277478
ENSG00000183723	2231.44	-0.151332	0.0503246	-3.00712	0.00263738	0.0277525
ENSG00000164934	2161.32	0.148084	0.049268	3.00568	0.00264991	0.0278681
ENSG00000095319	2375.28	0.168658	0.0561756	3.00233	0.00267922	0.0281435
ENSG00000111058	354.142	-0.286954	0.0955741	-3.00243	0.00267838	0.0281435
ENSG00000141027	7592.86	-0.119498	0.0398232	-3.00072	0.00269343	0.0282763
ENSG00000100129	7474.98	-0.139957	0.0466616	-2.9994	0.00270509	0.0283822
ENSG00000185339	342.959	-0.331617	0.11059	-2.99861	0.00271215	0.0284398
ENSG00000178031	290.512	-0.351893	0.117366	-2.99826	0.00271529	0.0284562
ENSG00000257704	200.577	0.364531	0.121606	2.99763	0.00272091	0.0284985
ENSG00000124508	449.368	-0.261732	0.0873472	-2.99645	0.00273139	0.0285917
ENSG00000151474	897.71	0.189754	0.0633456	2.99554	0.00273957	0.0286608
ENSG00000147251	3274.76	-0.196079	0.0654732	-2.9948	0.00274623	0.0287138
ENSG00000025800	4912.16	-0.16535	0.0552155	-2.99462	0.00274787	0.0287142
ENSG00000182584	18.997	0.459345	0.153468	2.9931	0.00276157	0.0288407
ENSG00000052841	4599.18	-0.164578	0.0549927	-2.99272	0.00276501	0.02886
ENSG00000168439	4924.84	0.123837	0.0413875	2.99213	0.00277041	0.0288996
ENSG00000172987	6.10246	-0.341329	0.11411	-2.99123	0.00277858	0.0289681
ENSG00000166484	997.711	0.300903	0.100612	2.99072	0.00278319	0.0289994
ENSG00000232434	208.615	0.355997	0.119065	2.98993	0.00279042	0.029058
ENSG00000136928	7.73578	0.359365	0.120259	2.98825	0.0028058	0.0292014
ENSG00000232316	17.2257	0.470433	0.157459	2.98766	0.00281125	0.0292412
ENSG00000131504	3069.09	0.156884	0.0525224	2.987	0.00281733	0.0292875
ENSG00000076685	2165.69	-0.167944	0.0562311	-2.98668	0.00282022	0.0293007
ENSG00000011258	897.408	-0.230693	0.0772598	-2.98593	0.00282714	0.0293557
ENSG00000213064	2909.73	-0.20122	0.0674062	-2.98518	0.00283409	0.0294016
ENSG00000164938	1919.89	-0.265948	0.0890917	-2.98511	0.00283481	0.0294016
ENSG00000237973	364.651	-0.279334	0.0936545	-2.9826	0.00285812	0.0296263
ENSG00000258676	9.90422	-0.426613	0.143086	-2.98151	0.00286827	0.0297145
ENSG00000165424	5631.16	-0.14772	0.0495488	-2.98131	0.00287021	0.0297175
ENSG00000100344	192.003	-0.329913	0.110687	-2.98059	0.00287697	0.0297704
ENSG00000187605	1251.61	-0.229743	0.0770943	-2.98003	0.00288222	0.0298077
ENSG00000120690	4465.43	-0.192565	0.0646517	-2.97849	0.00289668	0.0299401
ENSG00000136104	655.919	-0.23834	0.0800379	-2.97785	0.00290282	0.029974
ENSG00000185880	917.283	-0.213001	0.0715335	-2.97763	0.00290483	0.029974
ENSG00000099385	710.121	0.237353	0.0797122	2.97762	0.00290494	0.029974
ENSG00000169071	1292.71	-0.269631	0.0905697	-2.97706	0.00291031	0.0300123
ENSG00000154447	2049.96	0.214541	0.0720739	2.97667	0.00291394	0.0300325
ENSG00000171310	234.188	-0.323388	0.108673	-2.97578	0.00292244	0.030103
ENSG00000112679	1000.66	-0.176023	0.0591717	-2.97478	0.00293202	0.0301672
ENSG00000091592	1558.37	0.184171	0.0619076	2.97494	0.00293049	0.0301672
ENSG00000100629	100.304	0.393917	0.132479	2.97343	0.00294493	0.0302656
ENSG00000149925	42451.1	0.260075	0.0874631	2.97354	0.00294385	0.0302656
ENSG00000149636	299.479	0.313165	0.105354	2.97249	0.00295391	0.0303406
ENSG00000101290	2395.51	-0.160976	0.0541742	-2.97145	0.00296401	0.0304271
ENSG00000150995	328.787	-0.28457	0.0957916	-2.97072	0.00297099	0.0304468
ENSG00000188921	1293.59	-0.197124	0.06635	-2.97098	0.00296851	0.0304468
ENSG00000101199	4350.82	0.29208	0.0983143	2.97088	0.00296945	0.0304468
ENSG00000260244	7.33383	-0.372457	0.125442	-2.96916	0.00298615	0.0305819
ENSG00000232486	11.7738	0.450557	0.151753	2.96901	0.00298756	0.0305819
ENSG00000101150	9740.51	0.161946	0.0545506	2.96873	0.00299031	0.0305927
ENSG00000177363	759.297	0.261238	0.0880721	2.96618	0.00301519	0.0308297
ENSG00000044574	57034.7	0.171409	0.0578389	2.96355	0.00304112	0.0310772
ENSG00000155438	1729.64	0.180705	0.0610166	2.96157	0.00306072	0.031248
ENSG00000218014	45.7636	0.476214	0.160801	2.96152	0.00306129	0.031248
ENSG00000118263	3874.38	0.135821	0.0459064	2.95865	0.00308986	0.0315219
ENSG00000164542	187.828	-0.319675	0.108128	-2.95646	0.00311196	0.0317294
ENSG00000150782	11.9343	0.420341	0.142265	2.95464	0.00313031	0.0318984
ENSG00000170779	358.412	0.306616	0.103781	2.95444	0.00313239	0.0319017
ENSG00000213070	198.975	-0.303592	0.102765	-2.95425	0.00313434	0.0319035
ENSG00000236698	1799.5	0.189031	0.0640007	2.95358	0.00314109	0.0319542
ENSG00000082512	2280.06	-0.1842	0.0623872	-2.95253	0.00315186	0.0320457
ENSG00000170545	562.928	0.221959	0.0752199	2.95081	0.00316945	0.0322064
ENSG00000215548	24.8393	0.474735	0.160909	2.95032	0.0031744	0.0322386
ENSG00000231131	24.959	0.462069	0.15678	2.94725	0.00320614	0.0325426
ENSG00000198223	26.1159	0.475455	0.161346	2.9468	0.00321078	0.032559
ENSG00000046653	109.879	-0.396223	0.134469	-2.94657	0.00321316	0.032559
ENSG00000180574	2792.5	-0.206786	0.0701783	-2.94658	0.00321305	0.032559
ENSG00000278259	780.381	0.241425	0.0819515	2.94595	0.00321964	0.0326063
ENSG00000106771	4282.64	-0.148618	0.0504924	-2.94337	0.00324659	0.0328608
ENSG00000175946	13.3128	-0.453034	0.153932	-2.94308	0.00324965	0.0328733
ENSG00000175274	12090.2	-0.221133	0.0751652	-2.94195	0.00326149	0.0329746
ENSG00000126562	213.943	0.367102	0.124899	2.93919	0.0032907	0.0332514
ENSG00000103257	21597.3	0.349317	0.118869	2.93866	0.0032963	0.0332893
ENSG00000166387	1420.16	-0.229756	0.078224	-2.93716	0.00331237	0.0334329
ENSG00000130741	5530.52	-0.153379	0.0522367	-2.93624	0.00332221	0.0334948
ENSG00000174791	584.479	0.33885	0.115397	2.93639	0.00332055	0.0334948
ENSG00000024048	2748.69	-0.161904	0.0551629	-2.93501	0.00333535	0.0336085
ENSG00000170004	9630.76	-0.14101	0.0480566	-2.93424	0.00334363	0.0336731
ENSG00000125450	948.354	0.18007	0.0613903	2.93319	0.00335496	0.0337684
ENSG00000123080	1000.5	-0.23182	0.0790456	-2.93273	0.00335996	0.0337999
ENSG00000179981	6393.25	-0.169247	0.0577141	-2.93251	0.0033623	0.0338046
ENSG00000136942	8720.36	0.173014	0.0590228	2.93131	0.00337532	0.0339166
ENSG00000105329	2343.61	0.286411	0.0977209	2.93091	0.00337967	0.0339414
ENSG00000128534	970.996	-0.174583	0.059573	-2.93057	0.00338336	0.0339596
ENSG00000177042	475.729	-0.246207	0.0840767	-2.92836	0.00340756	0.0341645
ENSG00000141279	4116.28	-0.140083	0.0478353	-2.92846	0.0034065	0.0341645
ENSG00000107554	2426.93	0.182273	0.0622848	2.92644	0.00342869	0.0343573
ENSG00000141449	545.678	0.213143	0.0728522	2.92569	0.00343689	0.0344204
ENSG00000178999	177.046	0.343258	0.117369	2.92459	0.00344905	0.034523
ENSG00000091844	91.8377	0.453453	0.155088	2.92384	0.00345743	0.0345878
ENSG00000116791	1018.2	0.194395	0.0664942	2.92349	0.0034613	0.0346072
ENSG00000115904	3686.76	-0.215075	0.0736882	-2.91871	0.00351477	0.0351225
ENSG00000188488	13.9777	-0.437581	0.149934	-2.91849	0.00351727	0.0351279
ENSG00000185291	95.2996	-0.405609	0.139026	-2.9175	0.00352845	0.0352202
ENSG00000228307	10.3742	-0.437547	0.149991	-2.91715	0.00353247	0.0352408
ENSG00000134250	18929.9	-0.146098	0.0501297	-2.91441	0.00356361	0.0354926
ENSG00000143537	4169.63	0.276562	0.0948881	2.91461	0.00356135	0.0354926
ENSG00000090857	1623.53	-0.146909	0.0504067	-2.91447	0.00356291	0.0354926
ENSG00000164692	964422	0.130593	0.0448245	2.91344	0.00357473	0.0355837
ENSG00000140945	7894.93	-0.171724	0.0589507	-2.913	0.00357973	0.0356139
ENSG00000230457	766.016	0.189595	0.0651027	2.91224	0.00358847	0.0356738
ENSG00000136811	1690.37	0.181678	0.062387	2.91211	0.00358996	0.0356738
ENSG00000104998	412.869	0.262357	0.0900964	2.91196	0.00359168	0.0356738
ENSG00000142910	5123.4	-0.327057	0.11245	-2.90845	0.00363222	0.0360364
ENSG00000162746	31.4455	0.469194	0.161321	2.90844	0.00363235	0.0360364
ENSG00000069974	721.13	-0.224928	0.0773405	-2.90828	0.00363418	0.0360364
ENSG00000181458	3626.94	0.245385	0.0843962	2.90754	0.00364283	0.0361024
ENSG00000056558	253.652	-0.273004	0.0939165	-2.90688	0.00365054	0.036159
ENSG00000064692	404.486	-0.28643	0.0985678	-2.90592	0.00366175	0.0362501
ENSG00000159259	238.595	0.301728	0.103894	2.9042	0.00368187	0.0364293
ENSG00000160710	13217.9	-0.114112	0.0392986	-2.90372	0.00368761	0.0364661
ENSG00000164136	302.069	0.288281	0.0993004	2.90312	0.00369465	0.0365158
ENSG00000129235	1347.81	0.183845	0.063337	2.90264	0.00370028	0.0365514
ENSG00000167123	7434.68	0.268729	0.0925997	2.90205	0.00370728	0.0365805
ENSG00000156026	2047.44	-0.190358	0.0655916	-2.90218	0.00370577	0.0365805
ENSG00000248641	124.151	0.430403	0.148385	2.90059	0.00372461	0.0367114
ENSG00000256810	6.6417	-0.361889	0.124761	-2.90066	0.00372381	0.0367114
ENSG00000153246	2051.21	-0.222364	0.0766906	-2.8995	0.00373762	0.0368196
ENSG00000164056	82.0114	-0.408599	0.141013	-2.89761	0.00376019	0.0370015
ENSG00000165671	4301	-0.142092	0.049037	-2.89765	0.00375971	0.0370015
ENSG00000186150	21.2777	-0.466988	0.161256	-2.89594	0.00378022	0.0371608
ENSG00000123405	47.8754	-0.438251	0.151334	-2.89592	0.0037805	0.0371608
ENSG00000125703	451.558	-0.234301	0.0809257	-2.89526	0.00378839	0.0372182
ENSG00000139793	4107.07	-0.165908	0.05731	-2.89493	0.00379246	0.0372379
ENSG00000184840	12155.4	0.225596	0.0779383	2.89455	0.00379701	0.0372623
ENSG00000154721	411.797	0.306896	0.106049	2.89392	0.00380465	0.037317
ENSG00000128923	2775.13	-0.227263	0.0785432	-2.89348	0.00381001	0.0373493
ENSG00000231943	10.4369	0.388357	0.134232	2.89319	0.00381352	0.0373634
ENSG00000133019	10.9085	0.411204	0.142161	2.89253	0.00382149	0.0374212
ENSG00000231991	73650.6	0.114623	0.0396444	2.89128	0.0038368	0.0375304
ENSG00000141696	2714.65	0.24188	0.083654	2.89143	0.00383495	0.0375304
ENSG00000088881	226.948	-0.353601	0.122353	-2.89	0.00385241	0.0376627
ENSG00000089289	2206.17	-0.176174	0.0609655	-2.88974	0.00385565	0.037674
ENSG00000118997	20.6131	-0.462371	0.160047	-2.88897	0.00386502	0.0377043
ENSG00000167110	5107.66	0.119163	0.0412465	2.88904	0.00386415	0.0377043
ENSG00000101134	34.0822	0.463673	0.160489	2.88912	0.00386319	0.0377043
ENSG00000277998	1882.61	-0.265667	0.0920272	-2.88683	0.00389143	0.0379414
ENSG00000007944	94.3341	-0.409218	0.141762	-2.88664	0.00389375	0.0379436
ENSG00000113083	58310.1	0.207536	0.0719078	2.88614	0.00390003	0.0379647
ENSG00000015532	1757.97	0.296054	0.102578	2.88613	0.00390012	0.0379647
ENSG00000154305	6501.6	-0.22322	0.0773652	-2.88528	0.00391065	0.0380454
ENSG00000163590	80.239	-0.427254	0.148097	-2.88495	0.00391474	0.0380454
ENSG00000049541	420.192	0.23208	0.0804425	2.88504	0.00391365	0.0380454
ENSG00000152377	22926.7	-0.228926	0.0793654	-2.88446	0.00392088	0.0380683
ENSG00000173821	6358.12	-0.211117	0.0731921	-2.88442	0.00392131	0.0380683
ENSG00000120149	434.907	-0.325476	0.112866	-2.88373	0.00392998	0.0380707
ENSG00000005073	1755.76	-0.16823	0.0583289	-2.88416	0.00392461	0.0380707
ENSG00000236333	155.816	-0.361259	0.125272	-2.88379	0.00392925	0.0380707
ENSG00000180332	14.1669	0.387085	0.134222	2.88392	0.00392759	0.0380707
ENSG00000255455	250.745	-0.300499	0.104234	-2.88292	0.0039401	0.0381482
ENSG00000105810	4922.01	0.179	0.0620986	2.88251	0.00394522	0.0381568
ENSG00000136478	3307.13	0.127627	0.0442764	2.88251	0.00394518	0.0381568
ENSG00000165140	44.7076	-0.442861	0.15367	-2.8819	0.00395291	0.0382107
ENSG00000183111	155.986	-0.343525	0.119234	-2.88111	0.00396272	0.0382851
ENSG00000134222	264.958	0.289495	0.100546	2.87922	0.00398657	0.0384949
ENSG00000130751	68.0413	0.434454	0.151081	2.87564	0.00403212	0.0389139
ENSG00000013583	1819.35	-0.145483	0.0505995	-2.8752	0.00403775	0.0389267
ENSG00000186260	1005.11	-0.188009	0.0653876	-2.87531	0.00403631	0.0389267
ENSG00000158555	762.641	-0.357818	0.12447	-2.87474	0.00404357	0.0389412
ENSG00000004776	536.28	0.368779	0.128282	2.87475	0.0040435	0.0389412
ENSG00000145824	131.463	-0.394147	0.137119	-2.8745	0.00404673	0.0389509
ENSG00000164543	1947.04	0.15886	0.055318	2.87177	0.00408183	0.0392051
ENSG00000164983	2236.05	-0.195056	0.0679162	-2.87201	0.00407866	0.0392051
ENSG00000196072	1455.88	0.176864	0.0615825	2.87199	0.00407897	0.0392051
ENSG00000080839	364.244	0.271012	0.0943702	2.87179	0.00408151	0.0392051
ENSG00000196154	5424.55	0.153449	0.0534543	2.87066	0.00409618	0.039322
ENSG00000236439	2290.17	-0.248208	0.0864919	-2.86973	0.00410821	0.0394166
ENSG00000079156	307.789	0.279232	0.097316	2.86934	0.00411333	0.0394448
ENSG00000104881	263.205	0.392403	0.136818	2.86807	0.00412983	0.039582
ENSG00000162373	51.3972	0.452421	0.157785	2.86733	0.00413955	0.039654
ENSG00000186575	2528.42	0.17893	0.0624306	2.86605	0.00415622	0.0397926
ENSG00000181274	203.216	-0.315026	0.109925	-2.86582	0.00415934	0.0398014
ENSG00000136114	125.468	0.366012	0.127782	2.86434	0.00417874	0.0399447
ENSG00000120071	1688.14	-0.156862	0.0547612	-2.86447	0.00417705	0.0399447
ENSG00000154310	587.262	-0.241041	0.0841952	-2.86289	0.00419802	0.0400866
ENSG00000168014	3347.56	-0.196364	0.0685889	-2.86291	0.00419771	0.0400866
ENSG00000177613	1489.56	-0.16091	0.0562539	-2.86042	0.0042308	0.0403782
ENSG00000174738	2764	-0.223606	0.0781865	-2.85991	0.00423762	0.040422
ENSG00000165102	5637.3	-0.146673	0.051289	-2.85973	0.00424001	0.0404234
ENSG00000245571	184.17	0.312572	0.10933	2.85897	0.0042502	0.0404992
ENSG00000204516	758.743	-0.180048	0.0629893	-2.85839	0.00425792	0.0405513
ENSG00000253540	129.42	0.350865	0.122764	2.85805	0.00426258	0.0405743
ENSG00000092010	3760.67	-0.140957	0.049368	-2.85524	0.00430048	0.0409134
ENSG00000225972	2399.67	-0.192826	0.0675392	-2.85502	0.00430339	0.0409196
ENSG00000236603	2499.05	0.166644	0.0583792	2.8545	0.00431042	0.0409648
ENSG00000075702	104.958	0.424427	0.148868	2.85103	0.00435775	0.0413929
ENSG00000113645	238.412	-0.333388	0.116959	-2.85047	0.00436541	0.0414438
ENSG00000226194	8.56602	-0.391512	0.137365	-2.85016	0.00436971	0.0414629
ENSG00000175215	15418.5	-0.121209	0.0425362	-2.84955	0.00437818	0.0415214
ENSG00000143437	3386.59	-0.171936	0.0603708	-2.84799	0.00439962	0.0416155
ENSG00000163050	443.676	-0.268895	0.0943983	-2.84851	0.00439243	0.0416155
ENSG00000145681	21.9293	-0.443758	0.155811	-2.84805	0.0043988	0.0416155
ENSG00000165490	124.155	0.401126	0.140833	2.84824	0.00439618	0.0416155
ENSG00000213859	1242.97	0.168297	0.0590862	2.84832	0.00439506	0.0416155
ENSG00000106089	150.645	0.398308	0.1399	2.84708	0.00441224	0.041713
ENSG00000130024	3084.87	-0.227672	0.0799808	-2.84659	0.00441905	0.0417555
ENSG00000082781	7933.42	0.16174	0.0568328	2.84589	0.00442881	0.0418258
ENSG00000113048	3112.13	-0.141162	0.0496204	-2.84484	0.00444341	0.0418761
ENSG00000184584	2427.37	-0.274214	0.096386	-2.84496	0.0044417	0.0418761
ENSG00000279041	130.653	-0.341001	0.119856	-2.8451	0.00443979	0.0418761
ENSG00000149503	484.995	0.288348	0.101345	2.84521	0.0044382	0.0418761
ENSG00000166963	12861.6	-0.13857	0.0487151	-2.8445	0.00444815	0.0418989
ENSG00000181754	997.146	-0.188558	0.0662997	-2.84402	0.00445478	0.0419395
ENSG00000141338	113.552	-0.398386	0.140106	-2.84347	0.00446251	0.0419903
ENSG00000166473	101.806	-0.390091	0.137241	-2.84238	0.00447775	0.0421119
ENSG00000130584	158.453	0.338742	0.119216	2.84143	0.00449121	0.0422165
ENSG00000185760	36.2287	0.452032	0.15914	2.84046	0.0045048	0.0423221
ENSG00000101417	388.509	-0.227281	0.0800335	-2.83982	0.0045139	0.0423856
ENSG00000228328	514.985	0.224487	0.0791028	2.83791	0.00454102	0.0425517
ENSG00000271930	43.1572	-0.436587	0.153831	-2.83809	0.00453841	0.0425517
ENSG00000102554	1486.28	-0.234735	0.082706	-2.83818	0.00453713	0.0425517
ENSG00000198185	405.395	-0.272659	0.0960749	-2.83798	0.00453999	0.0425517
ENSG00000128714	42.7084	0.444033	0.15655	2.83637	0.00456295	0.0427129
ENSG00000006283	13.5551	0.437411	0.154215	2.83637	0.00456291	0.0427129
ENSG00000145476	827.425	-0.233653	0.0824079	-2.83532	0.00457792	0.0428308
ENSG00000162722	13.7413	-0.393306	0.138781	-2.83401	0.00459685	0.0429634
ENSG00000101224	3273.81	-0.212301	0.0749113	-2.83403	0.00459648	0.0429634
ENSG00000073849	587.953	-0.236345	0.0834264	-2.83298	0.0046117	0.0430799
ENSG00000122970	1149.54	-0.222958	0.0787124	-2.83257	0.00461757	0.0431125
ENSG00000156709	1232.36	-0.173754	0.0613484	-2.83225	0.00462214	0.0431328
ENSG00000117114	1325.7	0.219993	0.0776907	2.83166	0.00463078	0.0431911
ENSG00000273680	30.0755	-0.452132	0.159724	-2.8307	0.0046446	0.0432977
ENSG00000166349	47.3862	-0.436034	0.154058	-2.83032	0.00465013	0.0433116
ENSG00000250748	19.5173	0.435562	0.153894	2.83027	0.0046509	0.0433116
ENSG00000104221	235.785	0.287198	0.101494	2.82972	0.00465892	0.043364
ENSG00000162650	385.971	-0.301265	0.106514	-2.82842	0.00467784	0.0434128
ENSG00000163412	1030.31	-0.232784	0.0823033	-2.82837	0.00467859	0.0434128
ENSG00000118762	8830.17	-0.182278	0.0644304	-2.82906	0.00466848	0.0434128
ENSG00000169946	16.5032	-0.414978	0.146695	-2.82884	0.00467166	0.0434128
ENSG00000229419	647.484	-0.262515	0.0927977	-2.82889	0.00467094	0.0434128
ENSG00000102760	475.777	0.304062	0.107504	2.82839	0.00467831	0.0434128
ENSG00000033011	643.07	0.287008	0.101498	2.82773	0.00468787	0.0434542
ENSG00000141522	7235.17	0.317838	0.112395	2.82786	0.00468607	0.0434542
ENSG00000125354	2362.25	-0.13751	0.0486323	-2.82755	0.00469059	0.0434572
ENSG00000175556	26.7414	-0.455862	0.161326	-2.82571	0.00471754	0.0436621
ENSG00000176273	580.14	-0.243407	0.0861389	-2.82575	0.00471707	0.0436621
ENSG00000164104	1423.66	0.226778	0.0802787	2.82488	0.00472988	0.0437538
ENSG00000118816	11719.2	-0.197494	0.069956	-2.82312	0.00475592	0.0439497
ENSG00000073146	308.02	-0.252748	0.0895259	-2.82319	0.0047549	0.0439497
ENSG00000070371	586.757	0.259015	0.0917887	2.82186	0.00477454	0.0440992
ENSG00000149657	1998.3	0.155099	0.0549763	2.82119	0.0047846	0.0441695
ENSG00000158545	1865.94	0.194497	0.0689568	2.82056	0.00479399	0.0442335
ENSG00000173535	99.3367	0.375355	0.133097	2.82016	0.0048	0.0442552
ENSG00000107738	8483.35	-0.244961	0.0868632	-2.82008	0.00480124	0.0442552
ENSG00000115295	4523.71	-0.191258	0.0678443	-2.81907	0.00481628	0.0443712
ENSG00000177542	657.889	0.278858	0.0989774	2.81739	0.0048415	0.0445808
ENSG00000141959	7074	0.323886	0.115014	2.81605	0.00486188	0.0447457
ENSG00000147872	11036.7	0.171941	0.0610777	2.81512	0.00487596	0.0448295
ENSG00000224413	15.9865	0.4437	0.157613	2.81513	0.00487579	0.0448295
ENSG00000196850	1101.59	-0.171563	0.060949	-2.81485	0.00487994	0.0448433
ENSG00000109667	266.177	-0.346644	0.123172	-2.81432	0.00488804	0.0448948
ENSG00000214717	2679.72	-0.227218	0.0807408	-2.81416	0.00489051	0.0448948
ENSG00000173917	77.3542	0.394211	0.140119	2.8134	0.00490203	0.0449776
ENSG00000097096	373.386	-0.265296	0.0943251	-2.81257	0.00491473	0.045055
ENSG00000085185	1010.54	-0.216656	0.077037	-2.81236	0.00491795	0.045055
ENSG00000139625	1339.45	-0.209385	0.0744482	-2.81249	0.0049159	0.045055
ENSG00000163808	220.995	0.339009	0.120564	2.81187	0.00492547	0.045101
ENSG00000197208	238.597	0.31746	0.112907	2.81169	0.00492819	0.045103
ENSG00000275216	10.7112	0.364543	0.129719	2.81024	0.00495041	0.0452835
ENSG00000179152	1259.42	-0.197357	0.0702931	-2.80762	0.00499084	0.0456302
ENSG00000051180	169.313	0.372003	0.13252	2.80714	0.00499831	0.0456754
ENSG00000106397	7627.25	0.29547	0.105288	2.80631	0.00501117	0.0457697
ENSG00000175170	10.2799	-0.414966	0.147881	-2.80609	0.00501469	0.0457787
ENSG00000242498	1446.38	-0.19502	0.0695097	-2.80565	0.00502158	0.0458185
ENSG00000259495	75.3586	-0.40395	0.144132	-2.80264	0.00506864	0.0462245
ENSG00000108510	4560.13	-0.185246	0.066152	-2.80031	0.00510541	0.0465363
ENSG00000095203	198.943	-0.326254	0.116597	-2.79813	0.00513994	0.0468274
ENSG00000105835	2617.32	-0.229132	0.0819093	-2.79738	0.00515187	0.0469124
ENSG00000258647	7.95196	-0.351942	0.12582	-2.79719	0.00515491	0.0469164
ENSG00000137992	1457.58	-0.202273	0.072319	-2.79696	0.00515857	0.0469261
ENSG00000160789	25836	0.292598	0.104621	2.79673	0.00516228	0.0469362
ENSG00000070731	29.6291	-0.451017	0.161326	-2.79569	0.00517888	0.0470634
ENSG00000266472	1972.94	0.197118	0.0705158	2.79537	0.00518398	0.0470678
ENSG00000170629	59.2164	0.407768	0.145877	2.79529	0.00518528	0.0470678
ENSG00000173482	8816.17	-0.106815	0.0382143	-2.79517	0.00518719	0.0470678
ENSG00000150967	166.881	0.367777	0.131598	2.7947	0.0051948	0.0471133
ENSG00000106415	822.528	-0.185229	0.066288	-2.7943	0.00520119	0.0471239
ENSG00000173486	1148.4	0.26562	0.0950558	2.79436	0.0052002	0.0471239
ENSG00000071575	556.143	0.25648	0.0918119	2.79354	0.00521351	0.0472118
ENSG00000184702	892.635	0.210453	0.0753488	2.79305	0.00522133	0.0472589
ENSG00000117360	1412.8	0.145047	0.0519357	2.79282	0.00522506	0.047269
ENSG00000159873	1768.34	-0.1764	0.0631806	-2.792	0.00523839	0.0473659
ENSG00000204261	34.3662	-0.44024	0.157689	-2.79183	0.00524105	0.0473662
ENSG00000056586	4295.7	-0.169753	0.0608192	-2.79111	0.00525272	0.0474479
[truncated: 56,052 more rows]

## Sheet: Table 1b pS_vs_pE_Signf. data
pS1-4 vs pE 1-4 DeSeq2 expression analysis, Only Significant data is presented
Name	baseMean	log2FoldChange	lfcSE	stat	pvalue	padj	Ensembl	Gene ID		More than 2 fold upregulated	Gene ID
ENSG00000133048	112.405	2.11095	0.136256	15.4925	3.90132e-54	4.40289e-51	ENSG00000133048	CHI3L1		ENSG00000133048	CHI3L1
ENSG00000133169	165.697	2.06868	0.149877	13.8025	2.46219e-43	1.5331e-40	ENSG00000133169	BEX1		ENSG00000133169	BEX1
ENSG00000186281	60.7393	2.05733	0.160959	12.7818	2.07311e-37	9.13027e-35	ENSG00000186281	GPAT2		ENSG00000186281	GPAT2
ENSG00000164122	315.152	1.71314	0.109874	15.5918	8.27355e-55	1.06711e-51	ENSG00000164122	ASB5		ENSG00000164122	ASB5
ENSG00000104435	806.366	1.65409	0.088453	18.7002	4.93221e-78	1.78122e-74	ENSG00000104435	STMN2		ENSG00000104435	STMN2
ENSG00000073756	1120.26	1.58922	0.0925822	17.1655	4.81448e-66	1.44892e-62	ENSG00000073756	PTGS2		ENSG00000073756	PTGS2
ENSG00000105538	38.636	1.58645	0.161338	9.83308	8.11006e-23	1.76438e-20	ENSG00000105538	RASIP1		ENSG00000105538	RASIP1
ENSG00000197632	120.187	1.54656	0.128796	12.0078	3.23266e-33	1.21624e-30	ENSG00000197632	SERPINB2		ENSG00000197632	SERPINB2
ENSG00000182195	474.605	1.51392	0.0916416	16.52	2.63325e-61	5.28318e-58	ENSG00000182195	LDOC1		ENSG00000182195	LDOC1
ENSG00000145244	218.23	1.4529	0.108377	13.406	5.57761e-41	3.05197e-38	ENSG00000145244	CORIN		ENSG00000145244	CORIN
ENSG00000204849	18.9329	1.45153	0.157852	9.19548	3.7333e-20	6.48193e-18	ENSG00000204849	SPATA31A1		ENSG00000204849	SPATA31A1
ENSG00000138435	21.2348	1.38006	0.15802	8.73346	2.47004e-18	3.62614e-16	ENSG00000138435	CHRNA1		ENSG00000138435	CHRNA1
ENSG00000164093	37.4383	1.35446	0.159362	8.49925	1.90818e-17	2.61031e-15	ENSG00000164093	PITX2		ENSG00000164093	PITX2
ENSG00000154330	426.602	1.32845	0.0900672	14.7495	3.09961e-49	2.79848e-46	ENSG00000154330	PGM5		ENSG00000154330	PGM5
ENSG00000185633	854.598	1.30701	0.111324	11.7405	7.89829e-32	2.74268e-29	ENSG00000185633	NDUFA4L2		ENSG00000185633	NDUFA4L2
ENSG00000170961	52.3636	1.27297	0.155679	8.17686	2.91336e-16	3.41601e-14	ENSG00000170961	HAS2		ENSG00000170961	HAS2
ENSG00000152092	230.507	1.21068	0.118908	10.1816	2.39471e-24	5.68965e-22	ENSG00000152092	ASTN1		ENSG00000152092	ASTN1
ENSG00000157680	153.155	1.20119	0.140389	8.55616	1.16685e-17	1.64608e-15	ENSG00000157680	DGKI		ENSG00000157680	DGKI
ENSG00000104321	31.4269	1.18215	0.160908	7.34674	2.03093e-13	1.73803e-11	ENSG00000104321	TRPA1		ENSG00000104321	TRPA1
ENSG00000173376	39.741	1.14872	0.156314	7.34881	1.99981e-13	1.71955e-11	ENSG00000173376	NDNF		ENSG00000173376	NDNF
ENSG00000038295	67.1255	1.12997	0.149608	7.55291	4.25654e-14	4.04528e-12	ENSG00000038295	TLL1		ENSG00000038295	TLL1
ENSG00000102802	108.113	1.10569	0.142808	7.74248	9.74996e-15	9.78084e-13	ENSG00000102802	MEDAG		ENSG00000102802	MEDAG
ENSG00000206190	1099.93	1.10559	0.0689121	16.0435	6.34802e-58	1.04206e-54	ENSG00000206190	ATP10A		ENSG00000206190	ATP10A
ENSG00000166396	594.167	1.10535	0.0792268	13.9517	3.07106e-44	2.05385e-41	ENSG00000166396	SERPINB7		ENSG00000166396	SERPINB7
ENSG00000135218	1075.14	1.09235	0.102791	10.6269	2.23454e-26	6.30453e-24	ENSG00000135218	CD36		ENSG00000135218	CD36
ENSG00000198910	15069.9	1.08861	0.0931569	11.6858	1.50654e-31	5.08443e-29	ENSG00000198910	L1CAM		ENSG00000198910	L1CAM
ENSG00000182836	18.3645	1.08627	0.159003	6.83175	8.38826e-12	6.03453e-10	ENSG00000182836	PLCXD3		ENSG00000182836	PLCXD3
ENSG00000124882	173.902	1.0573	0.139133	7.59924	2.97884e-14	2.89187e-12	ENSG00000124882	EREG		ENSG00000124882	EREG
ENSG00000185697	455.959	1.047	0.112555	9.30217	1.37613e-20	2.43615e-18	ENSG00000185697	MYBL1		ENSG00000185697	MYBL1
ENSG00000100181	145.183	1.01487	0.124237	8.16881	3.11459e-16	3.62839e-14	ENSG00000100181	TPTEP1		ENSG00000100181	TPTEP1
ENSG00000148704	36.5099	1.00735	0.160939	6.2592	3.86951e-10	2.19034e-08	ENSG00000148704	VAX1		ENSG00000148704	VAX1
ENSG00000096696	3075.65	1.0018	0.0752327	13.3161	1.8664e-40	9.91223e-38	ENSG00000096696	DSP		ENSG00000096696	DSP
ENSG00000204442	50.11	0.995151	0.151905	6.55115	5.70959e-11	3.65596e-09	ENSG00000204442	FAM155A
ENSG00000149294	303.828	0.968417	0.0927542	10.4407	1.61632e-25	4.0536e-23	ENSG00000149294	NCAM1
ENSG00000241749	107.863	0.968398	0.144436	6.7047	2.01824e-11	1.37522e-09	ENSG00000241749	RPSAP52		More than 2 fold downregulated
ENSG00000113205	117.526	0.967927	0.123296	7.85043	4.14611e-15	4.35269e-13	ENSG00000113205	PCDHB3		ENSG00000111341	MGP
ENSG00000101282	63.3451	0.955787	0.148547	6.43423	1.24103e-10	7.72732e-09	ENSG00000101282	RSPO4		ENSG00000077943	ITGA8
ENSG00000162631	94.0658	0.950627	0.146718	6.47929	9.21582e-11	5.79951e-09	ENSG00000162631	NTNG1		ENSG00000147041	SYTL5
ENSG00000151320	1167.63	0.944205	0.0603522	15.6449	3.59783e-55	4.99739e-52	ENSG00000151320	AKAP6		ENSG00000140557	ST8SIA2
ENSG00000006059	309.927	0.937332	0.115451	8.11888	4.7052e-16	5.31011e-14	ENSG00000006059	KRT33A		ENSG00000143869	GDF7
ENSG00000167772	1284.05	0.936142	0.066397	14.0991	3.84385e-45	2.66955e-42	ENSG00000167772	ANGPTL4		ENSG00000166106	ADAMTS15
ENSG00000118473	124.553	0.931332	0.128709	7.23596	4.62248e-13	3.82881e-11	ENSG00000118473	SGIP1		ENSG00000157766	ACAN
ENSG00000041982	3432.33	0.913357	0.061702	14.8027	1.40694e-49	1.4114e-46	ENSG00000041982	TNC		ENSG00000138449	SLC40A1
ENSG00000158008	82.9586	0.912363	0.142555	6.40006	1.55311e-10	9.37946e-09	ENSG00000158008	EXTL1		ENSG00000139055	ERP27
ENSG00000183691	161.394	0.910944	0.142028	6.41386	1.41885e-10	8.65547e-09	ENSG00000183691	NOG		ENSG00000102837	OLFM4
ENSG00000122877	143.165	0.910508	0.143138	6.36106	2.00371e-10	1.19805e-08	ENSG00000122877	EGR2		ENSG00000196616	ADH1B
ENSG00000124134	83.4657	0.907725	0.145129	6.25462	3.98488e-10	2.24159e-08	ENSG00000124134	KCNS1		ENSG00000010932	FMO1
ENSG00000124343	19.1852	0.902743	0.158517	5.69491	1.23434e-08	5.13559e-07	ENSG00000124343	XG		ENSG00000158258	CLSTN2
ENSG00000186832	34.9189	0.900608	0.161028	5.59286	2.23364e-08	8.79331e-07	ENSG00000186832	KRT16		ENSG00000175928	LRRN1
ENSG00000110031	399.471	0.88509	0.0969577	9.12862	6.93771e-20	1.18183e-17	ENSG00000110031	LPXN		ENSG00000106483	SFRP4
ENSG00000131737	11638.3	0.874724	0.0987955	8.85388	8.45314e-19	1.27199e-16	ENSG00000131737	KRT34		ENSG00000135744	AGT
ENSG00000153064	46.7886	0.874685	0.155384	5.62919	1.81061e-08	7.24927e-07	ENSG00000153064	BANK1		ENSG00000205221	VIT
ENSG00000128805	261.251	0.871648	0.103567	8.41624	3.88771e-17	5.05039e-15	ENSG00000128805	ARHGAP22		ENSG00000171724	VAT1L
ENSG00000169432	2233.84	0.861308	0.0884159	9.74154	2.00488e-22	4.20956e-20	ENSG00000169432	SCN9A		ENSG00000156414	TDRD9
ENSG00000189001	124.4	0.854403	0.130361	6.5541	5.59768e-11	3.59706e-09	ENSG00000189001	SBSN		ENSG00000162989	KCNJ3
ENSG00000173114	53.9406	0.834221	0.150168	5.55526	2.77193e-08	1.08105e-06	ENSG00000173114	LRRN3		ENSG00000170396	ZNF804A
ENSG00000104369	31.7505	0.830056	0.161332	5.14502	2.67498e-07	8.31361e-06	ENSG00000104369	JPH1		ENSG00000162738	VANGL2
ENSG00000253953	387.518	0.818238	0.101433	8.06676	7.21888e-16	8.04638e-14	ENSG00000253953	PCDHGB4		ENSG00000148053	NTRK2
ENSG00000163083	1406.43	0.811053	0.0985702	8.22817	1.90091e-16	2.33502e-14	ENSG00000163083	INHBB		ENSG00000172572	PDE3A
ENSG00000007171	19.2106	0.809782	0.159472	5.07789	3.8165e-07	1.16213e-05	ENSG00000007171	NOS2		ENSG00000165507	C10orf10
ENSG00000172061	1108.58	0.806113	0.0689869	11.685	1.52051e-31	5.08443e-29	ENSG00000172061	LRRC15		ENSG00000162645	GBP2
ENSG00000003137	1068.42	0.803932	0.0584372	13.7572	4.60993e-43	2.77472e-40	ENSG00000003137	CYP26B1		ENSG00000100342	APOL1
ENSG00000178222	80.972	0.800448	0.150725	5.31064	1.09242e-07	3.76447e-06	ENSG00000178222	RNF212		ENSG00000003989	SLC7A2
ENSG00000113805	459.143	0.797458	0.0793434	10.0507	9.12054e-24	2.13883e-21	ENSG00000113805	CNTN3		ENSG00000104081	BMF
ENSG00000138623	2213.31	0.79084	0.0658605	12.0078	3.23307e-33	1.21624e-30	ENSG00000138623	SEMA7A		ENSG00000186479	RGS7BP
ENSG00000060718	8753.93	0.786883	0.0482359	16.3132	7.94789e-60	1.43515e-56	ENSG00000060718	COL11A1		ENSG00000171189	GRIK1
ENSG00000149968	1802.81	0.780309	0.117238	6.65574	2.8188e-11	1.88515e-09	ENSG00000149968	MMP3		ENSG00000113361	CDH6
ENSG00000101412	214.135	0.779646	0.114849	6.78843	1.13363e-11	7.99605e-10	ENSG00000101412	E2F1		ENSG00000167244	IGF2
ENSG00000167900	615.929	0.779134	0.103857	7.50197	6.28655e-14	5.73315e-12	ENSG00000167900	TK1		ENSG00000170891	CYTL1
ENSG00000226380	145.414	0.774307	0.125799	6.1551	7.50284e-10	3.96137e-08	ENSG00000226380	MIR29A
ENSG00000022556	10.0732	0.773658	0.14014	5.52062	3.37806e-08	1.29507e-06	ENSG00000022556	NLRP2
ENSG00000205426	147.744	0.7729	0.126984	6.08661	1.15329e-09	5.81429e-08	ENSG00000205426	KRT81
ENSG00000106366	48747.9	0.77204	0.0642715	12.0122	3.06706e-33	1.20395e-30	ENSG00000106366	SERPINE1
ENSG00000143476	257.861	0.770398	0.11169	6.89764	5.28733e-12	3.91284e-10	ENSG00000143476	DTL
ENSG00000110203	47.0775	0.763797	0.157825	4.83952	1.30156e-06	3.55557e-05	ENSG00000110203	FOLR3
ENSG00000162687	72.8451	0.761243	0.141147	5.39326	6.91918e-08	2.47405e-06	ENSG00000162687	KCNT2
ENSG00000196611	779.557	0.761203	0.120193	6.33319	2.40145e-10	1.40333e-08	ENSG00000196611	MMP1
ENSG00000103647	348.06	0.754894	0.104887	7.19724	6.14445e-13	4.95314e-11	ENSG00000103647	CORO2B
ENSG00000149948	2404	0.753751	0.0656308	11.4847	1.57429e-30	5.16854e-28	ENSG00000149948	HMGA2
ENSG00000143369	2543.12	0.749781	0.0942634	7.9541	1.80436e-15	1.93937e-13	ENSG00000143369	ECM1
ENSG00000163814	503.874	0.74547	0.0883327	8.43934	3.19128e-17	4.20619e-15	ENSG00000163814	CDCP1
ENSG00000253873	414.453	0.745187	0.0881246	8.45606	2.76572e-17	3.69931e-15	ENSG00000253873	PCDHGA11
ENSG00000116396	288.193	0.744435	0.0993571	7.49252	6.75653e-14	6.13078e-12	ENSG00000116396	KCNC4
ENSG00000138131	30191	0.743451	0.0796234	9.33709	9.90196e-21	1.80606e-18	ENSG00000138131	LOXL4
ENSG00000171617	1150.26	0.741095	0.0770119	9.62312	6.38627e-22	1.2957e-19	ENSG00000171617	ENC1
ENSG00000249992	539.79	0.736198	0.0818889	8.99021	2.46769e-19	3.90869e-17	ENSG00000249992	TMEM158
ENSG00000104368	3240.8	0.736096	0.0620203	11.8686	1.72263e-32	6.09911e-30	ENSG00000104368	PLAT
ENSG00000118526	24.4354	0.731961	0.160831	4.55111	5.33639e-06	0.000126956	ENSG00000118526	TCF21
ENSG00000110328	210.691	0.720701	0.101293	7.11503	1.11885e-12	8.93938e-11	ENSG00000110328	GALNT18
ENSG00000120217	223.453	0.720384	0.119221	6.04242	1.51819e-09	7.40916e-08	ENSG00000120217	CD274
ENSG00000175592	1293.86	0.717233	0.0761404	9.41986	4.51678e-21	8.58521e-19	ENSG00000175592	FOSL1
ENSG00000170989	218.721	0.716288	0.123014	5.82281	5.78661e-09	2.53614e-07	ENSG00000170989	S1PR1
ENSG00000143847	952.821	0.713874	0.0677312	10.5398	5.66159e-26	1.5034e-23	ENSG00000143847	PPFIA4
ENSG00000100031	89.994	0.710037	0.150086	4.73086	2.23566e-06	5.80854e-05	ENSG00000100031	GGT1
ENSG00000165244	160.606	0.708823	0.125112	5.66551	1.46584e-08	6.01562e-07	ENSG00000165244	ZNF367
ENSG00000139629	601.539	0.707052	0.0828266	8.53653	1.38312e-17	1.92115e-15	ENSG00000139629	GALNT6
ENSG00000131153	155.527	0.706549	0.119111	5.93184	2.99555e-09	1.39769e-07	ENSG00000131153	GINS2
ENSG00000123496	55.9225	0.705626	0.14932	4.72558	2.29458e-06	5.95305e-05	ENSG00000123496	IL13RA2
ENSG00000261934	69.2534	0.705188	0.154177	4.57389	4.78744e-06	0.00011588	ENSG00000261934	PCDHGA9
ENSG00000089685	498.67	0.698922	0.098365	7.10539	1.19979e-12	9.46054e-11	ENSG00000089685	BIRC5
ENSG00000160886	319.337	0.696065	0.151245	4.60224	4.17971e-06	0.000102824	ENSG00000160886	LY6K
ENSG00000186297	78.768	0.693765	0.148812	4.66202	3.13115e-06	7.88551e-05	ENSG00000186297	GABRA5
ENSG00000248810	16.2329	0.693036	0.15381	4.5058	6.61245e-06	0.000154265	ENSG00000248810	RP11-362F19.1
ENSG00000128342	719.217	0.691689	0.108894	6.35197	2.12571e-10	1.26263e-08	ENSG00000128342	LIF
ENSG00000127564	86.5803	0.689691	0.14546	4.74145	2.12196e-06	5.55307e-05	ENSG00000127564	PKMYT1
ENSG00000075223	14791	0.689212	0.105442	6.53642	6.30106e-11	4.02043e-09	ENSG00000075223	SEMA3C
ENSG00000188064	52.2488	0.688772	0.159537	4.31732	1.57934e-05	0.000335113	ENSG00000188064	WNT7B
ENSG00000237649	329.873	0.685874	0.110592	6.20185	5.5804e-10	3.0351e-08	ENSG00000237649	KIFC1
ENSG00000174136	1966.42	0.68378	0.0699863	9.77019	1.51171e-22	3.22667e-20	ENSG00000174136	RGMB
ENSG00000182261	256.706	0.68192	0.0968722	7.03937	1.93111e-12	1.47131e-10	ENSG00000182261	NLRP10
ENSG00000138347	959.008	0.679408	0.103124	6.58826	4.45006e-11	2.90089e-09	ENSG00000138347	MYPN
ENSG00000117152	1164.48	0.679321	0.157796	4.30505	1.66952e-05	0.00035259	ENSG00000117152	RGS4
ENSG00000158125	100.51	0.673091	0.12469	5.39812	6.73438e-08	2.41275e-06	ENSG00000158125	XDH
ENSG00000165891	111.168	0.67266	0.130437	5.15695	2.51e-07	7.85495e-06	ENSG00000165891	E2F7
ENSG00000120875	1613.19	0.670537	0.0676133	9.91725	3.50283e-23	7.71349e-21	ENSG00000120875	DUSP4
ENSG00000171345	10868.8	0.668389	0.119204	5.60708	2.05766e-08	8.18396e-07	ENSG00000171345	KRT19
ENSG00000133808	14.0729	0.667394	0.153657	4.3434	1.40295e-05	0.000300869	ENSG00000133808	MICALCL
ENSG00000175063	235.369	0.667381	0.125687	5.30987	1.09702e-07	3.76594e-06	ENSG00000175063	UBE2C
ENSG00000138356	1774.14	0.666946	0.0630628	10.5759	3.85468e-26	1.07083e-23	ENSG00000138356	AOX1
ENSG00000028277	270.228	0.666588	0.11976	5.56604	2.6059e-08	1.0185e-06	ENSG00000028277	POU2F2
ENSG00000163815	76.4138	0.665875	0.14365	4.63542	3.56222e-06	8.89668e-05	ENSG00000163815	CLEC3B
ENSG00000051341	142.069	0.66568	0.1185	5.61757	1.93666e-08	7.73677e-07	ENSG00000051341	POLQ
ENSG00000176532	55.9048	0.664434	0.146507	4.53517	5.75559e-06	0.000136032	ENSG00000176532	PRR15
ENSG00000114268	916.323	0.66129	0.110651	5.97634	2.2821e-09	1.09016e-07	ENSG00000114268	PFKFB4
ENSG00000152049	426.775	0.661266	0.108485	6.09543	1.09144e-09	5.56726e-08	ENSG00000152049	KCNE4
ENSG00000243766	69.0186	0.660213	0.158032	4.17772	2.94446e-05	0.000585551	ENSG00000243766	HOTTIP
ENSG00000197415	346.533	0.653603	0.121569	5.37637	7.60009e-08	2.69617e-06	ENSG00000197415	VEPH1
ENSG00000105889	85.8075	0.653176	0.150914	4.32815	1.50369e-05	0.000320946	ENSG00000105889	STEAP1B
ENSG00000164619	699.513	0.653066	0.0733428	8.9043	5.37243e-19	8.29145e-17	ENSG00000164619	BMPER
ENSG00000168702	88.5053	0.651406	0.145821	4.46716	7.92656e-06	0.000180481	ENSG00000168702	LRP1B
ENSG00000173210	748.189	0.65118	0.0775244	8.39969	4.4767e-17	5.73303e-15	ENSG00000173210	ABLIM3
ENSG00000171848	1151.36	0.650007	0.0873203	7.44394	9.77289e-14	8.56646e-12	ENSG00000171848	RRM2
ENSG00000163347	186.458	0.648457	0.134147	4.83394	1.33854e-06	3.64556e-05	ENSG00000163347	CLDN1
ENSG00000183963	1265.04	0.648457	0.103827	6.24552	4.22381e-10	2.36128e-08	ENSG00000183963	SMTN
ENSG00000145287	155.173	0.644489	0.118131	5.45573	4.87709e-08	1.80462e-06	ENSG00000145287	PLAC8
ENSG00000135318	1853.4	0.643898	0.0627771	10.2569	1.10192e-24	2.65298e-22	ENSG00000135318	NT5E
ENSG00000175084	45.1004	0.642385	0.157387	4.08156	4.47344e-05	0.000848497	ENSG00000175084	DES
ENSG00000108691	2542.45	0.639125	0.0668403	9.56197	1.15538e-21	2.31807e-19	ENSG00000108691	CCL2
ENSG00000125148	2282.7	0.637953	0.122503	5.20767	1.91226e-07	6.1946e-06	ENSG00000125148	MT2A
ENSG00000049130	2936.18	0.636141	0.079813	7.97039	1.58177e-15	1.7103e-13	ENSG00000049130	KITLG
ENSG00000046604	170.998	0.635462	0.117112	5.4261	5.7598e-08	2.10111e-06	ENSG00000046604	DSG2
ENSG00000107731	2534.07	0.633472	0.0658085	9.62599	6.21036e-22	1.27432e-19	ENSG00000107731	UNC5B
ENSG00000203760	139.91	0.632431	0.1167	5.4193	5.98343e-08	2.17828e-06	ENSG00000203760	CENPW
ENSG00000093009	151.775	0.631719	0.126322	5.00088	5.70681e-07	1.68379e-05	ENSG00000093009	CDC45
ENSG00000116183	604.544	0.630901	0.116837	5.39984	6.66992e-08	2.39918e-06	ENSG00000116183	PAPPA2
ENSG00000118785	26.6341	0.630148	0.161333	3.90589	9.38801e-05	0.00159773	ENSG00000118785	SPP1
ENSG00000154133	22.4282	0.63007	0.157489	4.00071	6.31526e-05	0.00113694	ENSG00000154133	ROBO4
ENSG00000102359	1349.82	0.62957	0.0604706	10.4112	2.20511e-25	5.45448e-23	ENSG00000102359	SRPX2
ENSG00000184860	34.5137	0.628469	0.157566	3.98859	6.64664e-05	0.00118478	ENSG00000184860	SDR42E1
ENSG00000131738	127.684	0.626739	0.120895	5.18415	2.17006e-07	6.88662e-06	ENSG00000131738	KRT33B
ENSG00000158089	179.74	0.625912	0.129207	4.84427	1.27076e-06	3.48195e-05	ENSG00000158089	GALNT14
ENSG00000115648	505.977	0.625732	0.0993285	6.29963	2.98366e-10	1.72128e-08	ENSG00000115648	MLPH
ENSG00000156113	575.87	0.625494	0.0776553	8.05475	7.96444e-16	8.76914e-14	ENSG00000156113	KCNMA1
ENSG00000169594	50.6447	0.625333	0.159713	3.91536	9.02708e-05	0.00154816	ENSG00000169594	BNC1
ENSG00000112984	734.465	0.625063	0.0869591	7.18801	6.57439e-13	5.27617e-11	ENSG00000112984	KIF20A
ENSG00000128918	14.2182	0.624938	0.15479	4.03733	5.40624e-05	0.000998164	ENSG00000128918	ALDH1A2
ENSG00000261573	38.3963	0.620964	0.160869	3.86005	0.000113365	0.00188319	ENSG00000261573	RP11-553K8.5
ENSG00000164283	20.2168	0.619748	0.157747	3.92875	8.53895e-05	0.00147689	ENSG00000164283	ESM1
ENSG00000121743	22.958	0.618149	0.158614	3.89718	9.73178e-05	0.00164231	ENSG00000121743	GJA3
ENSG00000024526	242.64	0.617588	0.120407	5.12916	2.91034e-07	8.99862e-06	ENSG00000024526	DEPDC1
ENSG00000100297	708.724	0.616237	0.100986	6.10218	1.04634e-09	5.36753e-08	ENSG00000100297	MCM5
ENSG00000120645	9.49438	0.613366	0.139865	4.38541	1.15766e-05	0.000253996	ENSG00000120645	IQSEC3
ENSG00000013293	148.849	0.612706	0.127736	4.79668	1.61321e-06	4.29008e-05	ENSG00000013293	SLC7A14
ENSG00000246763	354.121	0.611764	0.0901568	6.78556	1.15639e-11	8.12486e-10	ENSG00000246763	RGMB-AS1
ENSG00000139289	1398.02	0.611763	0.0844321	7.24562	4.30477e-13	3.59867e-11	ENSG00000139289	PHLDA1
ENSG00000163521	308.798	0.610843	0.0899764	6.78893	1.12968e-11	7.99605e-10	ENSG00000163521	GLB1L
ENSG00000169213	7558.37	0.609152	0.0492527	12.3679	3.89963e-35	1.67656e-32	ENSG00000169213	RAB3B
ENSG00000047936	44.2574	0.608973	0.152582	3.99112	6.57625e-05	0.00117572	ENSG00000047936	ROS1
ENSG00000276043	457.678	0.60849	0.100919	6.02948	1.64485e-09	7.98418e-08	ENSG00000276043	UHRF1
ENSG00000127824	336.578	0.606088	0.11291	5.36786	7.96772e-08	2.79365e-06	ENSG00000127824	TUBA4A
ENSG00000130720	107.259	0.605951	0.140778	4.30431	1.67505e-05	0.000353346	ENSG00000130720	FIBCD1
ENSG00000102383	10.8984	0.605898	0.147742	4.10105	4.11286e-05	0.000785051	ENSG00000102383	ZDHHC15
ENSG00000254585	96.2628	0.604839	0.143238	4.22261	2.41492e-05	0.00049106	ENSG00000254585	MAGEL2
ENSG00000184564	48.2561	0.601974	0.160607	3.74812	0.000178162	0.00282447	ENSG00000184564	SLITRK6
ENSG00000179954	1026.52	0.599393	0.090214	6.64413	3.05023e-11	2.01751e-09	ENSG00000179954	SSC5D
ENSG00000186185	156.827	0.599303	0.123353	4.85843	1.18318e-06	3.27176e-05	ENSG00000186185	KIF18B
ENSG00000178919	18.5303	0.598574	0.156589	3.82258	0.000132062	0.00215805	ENSG00000178919	FOXE1
ENSG00000117266	427.554	0.595185	0.0955523	6.22889	4.69747e-10	2.60191e-08	ENSG00000117266	CDK18
ENSG00000013297	490.342	0.594305	0.112566	5.27961	1.29457e-07	4.33693e-06	ENSG00000013297	CLDN11
ENSG00000120738	3482.86	0.594241	0.0945398	6.28562	3.26551e-10	1.87192e-08	ENSG00000120738	EGR1
ENSG00000221852	2167.85	0.59216	0.0623667	9.49482	2.20592e-21	4.37717e-19	ENSG00000221852	KRTAP1-5
ENSG00000154839	119.04	0.591013	0.124698	4.73956	2.14183e-06	5.59695e-05	ENSG00000154839	SKA1
ENSG00000100842	385.053	0.590804	0.119569	4.94113	7.76712e-07	2.21565e-05	ENSG00000100842	EFS
ENSG00000137310	435.765	0.5902	0.0931546	6.33571	2.36258e-10	1.3851e-08	ENSG00000137310	TCF19
ENSG00000113070	75.8213	0.589668	0.144696	4.07523	4.59691e-05	0.000869176	ENSG00000113070	HBEGF
ENSG00000132561	1260.03	0.589594	0.0788577	7.47669	7.62184e-14	6.84715e-12	ENSG00000132561	MATN2
ENSG00000071539	305.369	0.588762	0.0945982	6.22382	4.85201e-10	2.67929e-08	ENSG00000071539	TRIP13
ENSG00000270069	148.627	0.58869	0.130056	4.52645	5.99832e-06	0.000141215	ENSG00000270069	MIR222HG
ENSG00000143228	158.218	0.587293	0.138418	4.2429	2.20651e-05	0.000451222	ENSG00000143228	NUF2
ENSG00000094804	361.308	0.586607	0.112131	5.23144	1.68193e-07	5.5256e-06	ENSG00000094804	CDC6
ENSG00000127329	204.313	0.586068	0.111705	5.24656	1.54966e-07	5.13433e-06	ENSG00000127329	PTPRB
ENSG00000119969	181.289	0.585404	0.118155	4.95452	7.2509e-07	2.08155e-05	ENSG00000119969	HELLS
ENSG00000120708	34730.3	0.585247	0.0352125	16.6204	4.95633e-62	1.11871e-58	ENSG00000120708	TGFBI
ENSG00000205336	144.609	0.581637	0.127293	4.56929	4.89382e-06	0.000118139	ENSG00000205336	ADGRG1
ENSG00000167513	96.9004	0.578941	0.148499	3.89862	9.67428e-05	0.00163413	ENSG00000167513	CDT1
ENSG00000101194	982.962	0.577575	0.10289	5.6135	1.98273e-08	7.90335e-07	ENSG00000101194	SLC17A9
ENSG00000110092	11391.9	0.576823	0.039863	14.4701	1.87082e-47	1.53552e-44	ENSG00000110092	CCND1
ENSG00000179314	186.371	0.576201	0.115139	5.0044	5.60364e-07	1.65877e-05	ENSG00000179314	WSCD1
ENSG00000169851	291.348	0.575797	0.0934953	6.15856	7.34081e-10	3.89862e-08	ENSG00000169851	PCDH7
ENSG00000156265	369.277	0.575796	0.100376	5.73637	9.67285e-09	4.0809e-07	ENSG00000156265	MAP3K7CL
ENSG00000166206	108.159	0.57436	0.142001	4.04477	5.23742e-05	0.000970232	ENSG00000166206	GABRB3
ENSG00000166897	164.768	0.572042	0.143398	3.9892	6.62952e-05	0.00118299	ENSG00000166897	ELFN2
ENSG00000075218	200.025	0.571145	0.12389	4.6101	4.02482e-06	9.95565e-05	ENSG00000075218	GTSE1
ENSG00000265415	45.045	0.570768	0.158417	3.60293	0.000314646	0.00463543	ENSG00000265415	CTD-2510F5.4
ENSG00000204362	24.1789	0.570683	0.160254	3.56111	0.000369291	0.0052881	ENSG00000204362	RP11-380J14.1
ENSG00000166825	23596.5	0.568483	0.0803229	7.07747	1.46807e-12	1.14263e-10	ENSG00000166825	ANPEP
ENSG00000185565	20.6535	0.567135	0.161091	3.52059	0.000430586	0.00601787	ENSG00000185565	LSAMP
ENSG00000198028	43.7158	0.566994	0.154582	3.66793	0.000244526	0.00373238	ENSG00000198028	ZNF560
ENSG00000085840	81.3733	0.563239	0.141506	3.98033	6.88198e-05	0.00121951	ENSG00000085840	ORC1
ENSG00000061656	120.98	0.561562	0.14104	3.98157	6.8462e-05	0.00121675	ENSG00000061656	SPAG4
ENSG00000183287	1273.31	0.56006	0.0682383	8.20741	2.26018e-16	2.73906e-14	ENSG00000183287	CCBE1
ENSG00000117143	5060.73	0.559983	0.0707731	7.91237	2.52541e-15	2.66674e-13	ENSG00000117143	UAP1
ENSG00000105486	278.083	0.559078	0.101801	5.49189	3.97656e-08	1.48972e-06	ENSG00000105486	LIG1
ENSG00000204131	213.213	0.559	0.111837	4.99836	5.78211e-07	1.70045e-05	ENSG00000204131	NHSL2
ENSG00000007968	37.4627	0.55839	0.158091	3.53207	0.000412314	0.00579389	ENSG00000007968	E2F2
ENSG00000152952	17131.8	0.55743	0.103139	5.40463	6.4944e-08	2.34539e-06	ENSG00000152952	PLOD2
ENSG00000253837	86.9817	0.557339	0.140456	3.96805	7.24622e-05	0.00127405	ENSG00000253837	RP11-177H13.2
ENSG00000256663	313.083	0.555441	0.103041	5.39047	7.02746e-08	2.5078e-06	ENSG00000256663	RP11-424C20.2
ENSG00000122966	433.383	0.555054	0.0860624	6.44944	1.12263e-10	7.01429e-09	ENSG00000122966	CIT
ENSG00000173918	1081.21	0.554989	0.0905442	6.12948	8.81674e-10	4.57482e-08	ENSG00000173918	C1QTNF1
ENSG00000165480	164.641	0.553836	0.115757	4.78446	1.7145e-06	4.52612e-05	ENSG00000165480	SKA3
ENSG00000178662	155.803	0.552779	0.133944	4.12693	3.67632e-05	0.000713799	ENSG00000178662	CSRNP3
ENSG00000138180	559.293	0.552667	0.0979558	5.64201	1.68081e-08	6.7898e-07	ENSG00000138180	CEP55
ENSG00000139668	670.363	0.55253	0.0744656	7.41994	1.17176e-13	1.01723e-11	ENSG00000139668	WDFY2
ENSG00000154175	312.602	0.551854	0.126907	4.3485	1.37074e-05	0.000295363	ENSG00000154175	ABI3BP
ENSG00000102385	15.5257	0.551839	0.146859	3.75761	0.000171541	0.00272428	ENSG00000102385	DRP2
ENSG00000159640	271.391	0.551487	0.0984461	5.60192	2.11991e-08	8.39457e-07	ENSG00000159640	ACE
ENSG00000197506	23.0644	0.551065	0.161211	3.41828	0.000630175	0.00841648	ENSG00000197506	SLC28A3
ENSG00000138675	1637.08	0.54795	0.0653544	8.38429	5.10334e-17	6.44413e-15	ENSG00000138675	FGF5
ENSG00000134668	1225.15	0.54749	0.0969484	5.64723	1.63054e-08	6.64622e-07	ENSG00000134668	SPOCD1
ENSG00000161888	88.9149	0.54683	0.135836	4.02567	5.68128e-05	0.00104149	ENSG00000161888	SPC24
ENSG00000137331	852.379	0.545861	0.100028	5.45706	4.84074e-08	1.79485e-06	ENSG00000137331	IER3
ENSG00000000971	895.386	0.544742	0.0716515	7.60267	2.90082e-14	2.83136e-12	ENSG00000000971	CFH
ENSG00000247095	985.303	0.542152	0.0906877	5.97823	2.25573e-09	1.08042e-07	ENSG00000247095	MIR210HG
ENSG00000080709	361.574	0.541585	0.0938704	5.76949	7.95112e-09	3.39417e-07	ENSG00000080709	KCNN2
ENSG00000101057	344.045	0.541253	0.119792	4.51826	6.23491e-06	0.000146593	ENSG00000101057	MYBL2
ENSG00000184226	175.34	0.541232	0.120975	4.47391	7.6802e-06	0.000176215	ENSG00000184226	PCDH9
ENSG00000107159	21.6861	0.540729	0.157707	3.42869	0.000606503	0.00811833	ENSG00000107159	CA9
ENSG00000111186	2825.65	0.540011	0.0574178	9.40494	5.20592e-21	9.79201e-19	ENSG00000111186	WNT5B
ENSG00000087586	481.891	0.539892	0.105445	5.12011	3.05355e-07	9.4092e-06	ENSG00000087586	AURKA
ENSG00000117650	157.707	0.536069	0.113235	4.73413	2.19999e-06	5.74065e-05	ENSG00000117650	NEK2
ENSG00000183087	17510.4	0.536036	0.103589	5.17463	2.28361e-07	7.22157e-06	ENSG00000183087	GAS6
ENSG00000123219	132.786	0.535367	0.120325	4.44934	8.61345e-06	0.000194032	ENSG00000123219	CENPK
ENSG00000117724	1173.64	0.534853	0.073637	7.26337	3.7757e-13	3.17106e-11	ENSG00000117724	CENPF
ENSG00000127080	153.475	0.534577	0.11107	4.81299	1.48686e-06	4.00124e-05	ENSG00000127080	IPPK
ENSG00000114948	326.291	0.534497	0.0841638	6.35067	2.14373e-10	1.26916e-08	ENSG00000114948	ADAM23
ENSG00000170498	40.7257	0.532443	0.158989	3.34894	0.000811225	0.0103962	ENSG00000170498	KISS1
ENSG00000076382	388.668	0.532415	0.100245	5.31114	1.08944e-07	3.76138e-06	ENSG00000076382	SPAG5
ENSG00000148773	1713.15	0.531664	0.0685798	7.75249	9.01104e-15	9.09008e-13	ENSG00000148773	MKI67
ENSG00000085999	64.9378	0.531485	0.149711	3.55006	0.000385138	0.00546733	ENSG00000085999	RAD54L
ENSG00000160460	52.7456	0.530592	0.148744	3.56714	0.000360901	0.00518441	ENSG00000160460	SPTBN4
ENSG00000263535	426.751	0.526776	0.0865872	6.08376	1.17395e-09	5.88835e-08	ENSG00000263535	AK4P1
ENSG00000189057	255.185	0.526756	0.132324	3.9808	6.86835e-05	0.00121949	ENSG00000189057	FAM111B
ENSG00000174371	147.55	0.526238	0.13477	3.9047	9.43414e-05	0.00160256	ENSG00000174371	EXO1
ENSG00000119630	103.212	0.525906	0.137505	3.82462	0.000130972	0.00214218	ENSG00000119630	PGF
ENSG00000065328	161.918	0.525234	0.118521	4.43158	9.35434e-06	0.00020879	ENSG00000065328	MCM10
ENSG00000117399	475.702	0.524336	0.0835322	6.27706	3.45041e-10	1.96543e-08	ENSG00000117399	CDC20
ENSG00000137563	597.92	0.523859	0.104647	5.00595	5.5588e-07	1.6482e-05	ENSG00000137563	GGH
ENSG00000115339	430.828	0.522779	0.100045	5.22543	1.73755e-07	5.67357e-06	ENSG00000115339	GALNT3
ENSG00000132972	7.15676	0.521996	0.131225	3.97788	6.95322e-05	0.00122732	ENSG00000132972	RNF17
ENSG00000274307	23.8303	0.521574	0.160287	3.254	0.00113791	0.0137129	ENSG00000274307	RP11-345J18.2
ENSG00000184838	550.043	0.520977	0.0963934	5.40469	6.4919e-08	2.34539e-06	ENSG00000184838	PRR16
ENSG00000214826	30.7899	0.520308	0.161345	3.22482	0.00126052	0.0149942	ENSG00000214826	DDX12P
ENSG00000102349	211.955	0.518905	0.124228	4.17705	2.95314e-05	0.000586633	ENSG00000102349	KLF8
ENSG00000122952	388.583	0.518877	0.106761	4.86019	1.17274e-06	3.24787e-05	ENSG00000122952	ZWINT
ENSG00000146670	267.639	0.517899	0.115543	4.48232	7.38374e-06	0.000169845	ENSG00000146670	CDCA5
ENSG00000126785	1236.96	0.517568	0.0705011	7.34127	2.11579e-13	1.80211e-11	ENSG00000126785	RHOJ
ENSG00000006016	185.406	0.517281	0.112197	4.61048	4.01744e-06	9.95101e-05	ENSG00000006016	CRLF1
ENSG00000132359	811.285	0.517213	0.0941431	5.49391	3.93136e-08	1.47585e-06	ENSG00000132359	RAP1GAP2
ENSG00000169908	29.8105	0.517037	0.161346	3.20452	0.00135286	0.0158012	ENSG00000169908	TM4SF1
ENSG00000035499	65.6579	0.516989	0.141777	3.64649	0.000265844	0.00402713	ENSG00000035499	DEPDC1B
ENSG00000134690	314.26	0.51657	0.103357	4.99793	5.795e-07	1.70147e-05	ENSG00000134690	CDCA8
ENSG00000164251	58.1285	0.516311	0.157289	3.28257	0.00102867	0.0126272	ENSG00000164251	F2RL1
ENSG00000206262	32.3282	0.516127	0.160379	3.21817	0.00129013	0.0152674	ENSG00000206262	FOXL2NB
ENSG00000005884	7167.25	0.515488	0.0948292	5.43596	5.45029e-08	1.99335e-06	ENSG00000005884	ITGA3
ENSG00000133110	45.4562	0.51534	0.159158	3.23792	0.00120404	0.0144173	ENSG00000133110	POSTN
ENSG00000127586	136.098	0.514822	0.140726	3.65834	0.000253859	0.00386178	ENSG00000127586	CHTF18
ENSG00000028137	138.853	0.514512	0.131862	3.90189	9.54426e-05	0.0016167	ENSG00000028137	TNFRSF1B
ENSG00000185972	56.4886	0.514404	0.15431	3.33356	0.000857413	0.0108877	ENSG00000185972	CCIN
ENSG00000166922	158.951	0.514189	0.112564	4.56796	4.92494e-06	0.000118573	ENSG00000166922	SCG5
ENSG00000107338	252.739	0.513378	0.105177	4.88108	1.05505e-06	2.94451e-05	ENSG00000107338	SHB
ENSG00000011426	1781.66	0.512315	0.0985577	5.19813	2.01308e-07	6.46802e-06	ENSG00000011426	ANLN
ENSG00000230928	85.8025	0.512127	0.150618	3.40016	0.000673455	0.00888931	ENSG00000230928	RP11-34A14.3
ENSG00000171241	405.965	0.511646	0.0967633	5.2876	1.23932e-07	4.19071e-06	ENSG00000171241	SHCBP1
ENSG00000177606	4527.67	0.509089	0.112739	4.51562	6.31314e-06	0.000148047	ENSG00000177606	JUN
ENSG00000173207	135.539	0.508388	0.116996	4.34533	1.39064e-05	0.000298939	ENSG00000173207	CKS1B
ENSG00000248698	168.889	0.507067	0.118696	4.27196	1.93759e-05	0.000401228	ENSG00000248698	LINC01085
ENSG00000267279	26.3368	0.506595	0.155227	3.26358	0.00110014	0.0133503	ENSG00000267279	RP11-879F14.2
ENSG00000164611	307.194	0.505699	0.0950965	5.31774	1.05064e-07	3.63437e-06	ENSG00000164611	PTTG1
ENSG00000259721	58.9937	0.505424	0.145501	3.47369	0.000513357	0.00703314	ENSG00000259721	RP11-758N13.1
ENSG00000164932	361.214	0.505321	0.0875699	5.77049	7.90412e-09	3.3821e-07	ENSG00000164932	CTHRC1
ENSG00000115414	381242	0.504699	0.0613669	8.22429	1.96356e-16	2.39568e-14	ENSG00000115414	FN1
ENSG00000013810	688.276	0.504212	0.0924354	5.45475	4.90414e-08	1.81092e-06	ENSG00000013810	TACC3
ENSG00000214900	49.7983	0.504035	0.149595	3.36932	0.000753545	0.009782	ENSG00000214900	LINC01588
ENSG00000183856	515.961	0.504	0.0978626	5.15008	2.60378e-07	8.10628e-06	ENSG00000183856	IQGAP3
ENSG00000242779	130.094	0.503692	0.127322	3.95606	7.61957e-05	0.0013345	ENSG00000242779	ZNF702P
ENSG00000100526	160.514	0.503065	0.123077	4.08741	4.36209e-05	0.000829993	ENSG00000100526	CDKN3
ENSG00000163359	129510	0.500756	0.0573495	8.73166	2.50954e-18	3.65442e-16	ENSG00000163359	COL6A3
ENSG00000101447	236.165	0.500599	0.111582	4.48638	7.24445e-06	0.000167066	ENSG00000101447	FAM83D
ENSG00000102879	28.4759	0.500146	0.160886	3.1087	0.00187915	0.0207281	ENSG00000102879	CORO1A
ENSG00000067057	5577.69	0.499732	0.0990119	5.04719	4.48353e-07	1.35383e-05	ENSG00000067057	PFKP
ENSG00000104889	265.837	0.499018	0.116158	4.29604	1.73877e-05	0.000365932	ENSG00000104889	RNASEH2A
ENSG00000117069	91.3731	0.498078	0.134369	3.70678	0.000209912	0.00325919	ENSG00000117069	ST6GALNAC5
ENSG00000187608	339.803	0.498023	0.146098	3.40883	0.000652418	0.00867504	ENSG00000187608	ISG15
ENSG00000145934	2342.22	0.497506	0.0731412	6.80199	1.03181e-11	7.36419e-10	ENSG00000145934	TENM2
ENSG00000124249	67.9265	0.4973	0.150198	3.31095	0.000929787	0.0115867	ENSG00000124249	KCNK15
ENSG00000119681	5211.49	0.497125	0.0724233	6.86415	6.68873e-12	4.88981e-10	ENSG00000119681	LTBP2
ENSG00000068489	315.09	0.496684	0.105176	4.72239	2.33091e-06	6.02135e-05	ENSG00000068489	PRR11
ENSG00000162840	229.484	0.49645	0.123785	4.01058	6.05697e-05	0.001097	ENSG00000162840	MT2P1
ENSG00000114670	168.761	0.496209	0.11221	4.42215	9.77215e-06	0.00021731	ENSG00000114670	NEK11
ENSG00000144810	6518.61	0.496131	0.063506	7.81235	5.61311e-15	5.82505e-13	ENSG00000144810	COL8A1
ENSG00000158747	591.837	0.49408	0.115639	4.2726	1.93206e-05	0.000400542	ENSG00000158747	NBL1
ENSG00000198768	410.479	0.493886	0.0994731	4.96503	6.86916e-07	1.98458e-05	ENSG00000198768	APCDD1L
ENSG00000136531	29.6178	0.493608	0.160167	3.08184	0.00205725	0.0224866	ENSG00000136531	SCN2A
ENSG00000139318	1306.72	0.492503	0.0775675	6.34934	2.16234e-10	1.27599e-08	ENSG00000139318	DUSP6
ENSG00000149212	117.472	0.491852	0.129354	3.80238	0.00014331	0.00232712	ENSG00000149212	SESN3
ENSG00000170571	209.784	0.490204	0.10227	4.79324	1.64108e-06	4.35139e-05	ENSG00000170571	EMB
ENSG00000180801	1985.83	0.489732	0.0692963	7.06721	1.58082e-12	1.21986e-10	ENSG00000180801	ARSJ
ENSG00000110693	236.424	0.489467	0.120568	4.05969	4.91373e-05	0.000920406	ENSG00000110693	SOX6
ENSG00000111674	3340.8	0.489336	0.0466295	10.4941	9.1927e-26	2.40569e-23	ENSG00000111674	ENO2
ENSG00000187741	170.623	0.489195	0.134842	3.62791	0.00028573	0.00427458	ENSG00000187741	FANCA
ENSG00000229373	25.7689	0.487058	0.160761	3.02969	0.00244801	0.0260175	ENSG00000229373	LINC00452
ENSG00000079337	82.7655	0.486174	0.14293	3.40147	0.000670235	0.00885976	ENSG00000079337	RAPGEF3
ENSG00000125637	183.116	0.485629	0.116082	4.18349	2.87063e-05	0.00057213	ENSG00000125637	PSD4
ENSG00000231426	154.518	0.484576	0.135027	3.58873	0.000332288	0.00483491	ENSG00000231426	RP5-899B16.1
ENSG00000136982	91.0279	0.482864	0.135308	3.56862	0.000358866	0.00516338	ENSG00000136982	DSCC1
ENSG00000271709	17.4269	0.481638	0.158462	3.03946	0.00237001	0.025281	ENSG00000271709	RP11-297J22.1
ENSG00000271614	59.407	0.480947	0.148177	3.24577	0.00117135	0.0140632	ENSG00000271614	LINC00936
ENSG00000105011	154.567	0.480717	0.123064	3.90624	9.37436e-05	0.00159691	ENSG00000105011	ASF1B
ENSG00000165731	49.5724	0.479966	0.15577	3.08125	0.00206136	0.0225042	ENSG00000165731	RET
ENSG00000171509	19.4155	0.479812	0.147754	3.24737	0.00116475	0.0140213	ENSG00000171509	RXFP1
ENSG00000088340	280.544	0.479763	0.117192	4.09384	4.24287e-05	0.000808159	ENSG00000088340	FER1L4
ENSG00000137309	4348.97	0.479747	0.0792069	6.05689	1.38775e-09	6.84663e-08	ENSG00000137309	HMGA1
ENSG00000149380	327.725	0.479182	0.0907555	5.27992	1.29238e-07	4.33693e-06	ENSG00000149380	P4HA3
ENSG00000183049	362.698	0.478671	0.0863962	5.54041	3.01757e-08	1.16677e-06	ENSG00000183049	CAMK1D
ENSG00000162073	84.8044	0.478514	0.142537	3.35713	0.000787561	0.0101637	ENSG00000162073	PAQR4
ENSG00000173546	4398.85	0.477021	0.113359	4.20805	2.57582e-05	0.000519103	ENSG00000173546	CSPG4
ENSG00000218014	45.7636	0.476214	0.160801	2.96152	0.00306129	0.031248	ENSG00000218014	KRT19P1
ENSG00000129195	177.356	0.476055	0.110967	4.29006	1.78628e-05	0.000374186	ENSG00000129195	FAM64A
ENSG00000251226	7.13914	0.475636	0.132713	3.58395	0.000338438	0.00491252	ENSG00000251226	RP11-469N6.1
ENSG00000198223	26.1159	0.475455	0.161346	2.9468	0.00321078	0.032559	ENSG00000198223	CSF2RA
ENSG00000072682	11716.7	0.474736	0.0534194	8.88697	6.27996e-19	9.52918e-17	ENSG00000072682	P4HA2
ENSG00000215548	24.8393	0.474735	0.160909	2.95032	0.0031744	0.0322386	ENSG00000215548	FRG1JP
ENSG00000082126	145.357	0.473783	0.131702	3.5974	0.000321417	0.00470707	ENSG00000082126	MPP4
ENSG00000147119	150.541	0.473183	0.134221	3.5254	0.000422837	0.00591414	ENSG00000147119	CHST7
ENSG00000196155	430.145	0.472933	0.116593	4.05627	4.98632e-05	0.0009315	ENSG00000196155	PLEKHG4
ENSG00000139971	263.524	0.471948	0.0977303	4.82908	1.37163e-06	3.71886e-05	ENSG00000139971	C14orf37
ENSG00000203772	210.898	0.471605	0.125382	3.76133	0.000169013	0.00269124	ENSG00000203772	SPRN
ENSG00000232316	17.2257	0.470433	0.157459	2.98766	0.00281125	0.0292412	ENSG00000232316	RP1-124C6.1
ENSG00000171320	142.072	0.470147	0.137747	3.41313	0.000642211	0.00855192	ENSG00000171320	ESCO2
ENSG00000165304	522.932	0.469344	0.111859	4.19586	2.71834e-05	0.00054418	ENSG00000165304	MELK
ENSG00000162746	31.4455	0.469194	0.161321	2.90844	0.00363235	0.0360364	ENSG00000162746	FCRLB
ENSG00000080823	430.258	0.468086	0.0876327	5.34145	9.22046e-08	3.21417e-06	ENSG00000080823	MOK
ENSG00000166851	336.122	0.467977	0.122801	3.81087	0.00013848	0.0022568	ENSG00000166851	PLK1
ENSG00000135919	27092.5	0.46768	0.0898646	5.20427	1.94756e-07	6.27984e-06	ENSG00000135919	SERPINE2
ENSG00000144802	848.119	0.46728	0.0827574	5.64638	1.63864e-08	6.66419e-07	ENSG00000144802	NFKBIZ
ENSG00000197106	51.0338	0.466699	0.152963	3.05105	0.0022804	0.0245248	ENSG00000197106	SLC6A17
ENSG00000181751	886.312	0.465784	0.0769663	6.05179	1.43244e-09	7.00964e-08	ENSG00000181751	C5orf30
ENSG00000106003	156.035	0.465725	0.120137	3.87663	0.000105913	0.0017659	ENSG00000106003	LFNG
ENSG00000166803	71.1927	0.465016	0.143665	3.23682	0.00120871	0.014454	ENSG00000166803	KIAA0101
ENSG00000079931	878.364	0.463882	0.0811318	5.71764	1.08016e-08	4.50449e-07	ENSG00000079931	MOXD1
ENSG00000101134	34.0822	0.463673	0.160489	2.88912	0.00386319	0.0377043	ENSG00000101134	DOK5
ENSG00000116711	86.6627	0.463269	0.140253	3.30309	0.00095625	0.0118919	ENSG00000116711	PLA2G4A
ENSG00000183671	1015.09	0.463181	0.0695764	6.65717	2.79158e-11	1.87389e-09	ENSG00000183671	GPR1
ENSG00000231131	24.959	0.462069	0.15678	2.94725	0.00320614	0.0325426	ENSG00000231131	LINC01468
ENSG00000171873	182.379	0.461553	0.143695	3.21204	0.00131797	0.0154976	ENSG00000171873	ADRA1D
ENSG00000117600	4443.48	0.460997	0.091527	5.03673	4.73549e-07	1.42278e-05	ENSG00000117600	PLPPR4
ENSG00000173221	2831.81	0.460894	0.0517833	8.90044	5.56254e-19	8.5121e-17	ENSG00000173221	GLRX
ENSG00000168061	241.043	0.460285	0.120899	3.80717	0.000140564	0.0022887	ENSG00000168061	SAC3D1
ENSG00000142731	170.591	0.459388	0.136846	3.35697	0.000788015	0.0101637	ENSG00000142731	PLK4
ENSG00000182584	18.997	0.459345	0.153468	2.9931	0.00276157	0.0288407	ENSG00000182584	ACTL10
ENSG00000072571	298.916	0.458804	0.113113	4.05617	4.98843e-05	0.0009315	ENSG00000072571	HMMR
ENSG00000227295	1238.28	0.457083	0.0790989	5.77863	7.5313e-09	3.23023e-07	ENSG00000227295	ELL2P1
ENSG00000164733	81904.5	0.457064	0.060575	7.54542	4.50849e-14	4.19701e-12	ENSG00000164733	CTSB
ENSG00000129038	4541.74	0.456811	0.121561	3.75787	0.000171365	0.0027239	ENSG00000129038	LOXL1
ENSG00000156970	334.713	0.45633	0.0981156	4.65094	3.3043e-06	8.31e-05	ENSG00000156970	BUB1B
ENSG00000142552	2361.67	0.455182	0.121842	3.73585	0.000187082	0.00295551	ENSG00000142552	RCN3
ENSG00000149575	9.66341	0.45457	0.137245	3.31211	0.000925953	0.0115543	ENSG00000149575	SCN2B
ENSG00000091844	91.8377	0.453453	0.155088	2.92384	0.00345743	0.0345878	ENSG00000091844	RGS17
ENSG00000197457	805.495	0.452891	0.0943155	4.80187	1.5719e-06	4.205e-05	ENSG00000197457	STMN3
ENSG00000162373	51.3972	0.452421	0.157785	2.86733	0.00413955	0.039654	ENSG00000162373	BEND5
ENSG00000185760	36.2287	0.452032	0.15914	2.84046	0.0045048	0.0423221	ENSG00000185760	KCNQ5
ENSG00000232486	11.7738	0.450557	0.151753	2.96901	0.00298756	0.0305819	ENSG00000232486	RP11-18B3.2
ENSG00000160013	395.672	0.44995	0.139911	3.21598	0.00129999	0.0153325	ENSG00000160013	PTGIR
ENSG00000139874	2346.39	0.44923	0.063192	7.10897	1.16915e-12	9.25939e-11	ENSG00000139874	SSTR1
ENSG00000146950	228.121	0.448782	0.105119	4.26929	1.96094e-05	0.000405597	ENSG00000146950	SHROOM2
ENSG00000100678	31.8529	0.448674	0.161079	2.78542	0.00534584	0.0480267	ENSG00000100678	SLC8A3
ENSG00000242265	1473.44	0.447512	0.0665524	6.72421	1.76545e-11	1.21675e-09	ENSG00000242265	PEG10
ENSG00000198901	985.262	0.447271	0.0912101	4.90374	9.40284e-07	2.64878e-05	ENSG00000198901	PRC1
ENSG00000121075	630.217	0.445763	0.0902644	4.93842	7.87598e-07	2.2326e-05	ENSG00000121075	TBX4
ENSG00000279970	17.5379	0.445111	0.159632	2.78836	0.00529757	0.0477336	ENSG00000279970	RP11-299G20.5
ENSG00000102678	117.515	0.444498	0.143296	3.10196	0.00192245	0.0211798	ENSG00000102678	FGF9
ENSG00000128714	42.7084	0.444033	0.15655	2.83637	0.00456295	0.0427129	ENSG00000128714	HOXD13
ENSG00000214193	663.566	0.443858	0.0894799	4.96042	7.03425e-07	2.0258e-05	ENSG00000214193	SH3D21
ENSG00000169607	296.265	0.443724	0.114388	3.87911	0.000104838	0.00175284	ENSG00000169607	CKAP2L
ENSG00000224413	15.9865	0.4437	0.157613	2.81513	0.00487579	0.0448295	ENSG00000224413	AP001476.2
ENSG00000144583	1271.11	0.442861	0.0793028	5.58443	2.34463e-08	9.20369e-07	ENSG00000144583	MARCH4
ENSG00000128422	398.694	0.442798	0.101613	4.35767	1.31456e-05	0.000284617	ENSG00000128422	KRT17
ENSG00000074410	1546.77	0.442148	0.065547	6.74552	1.52478e-11	1.05896e-09	ENSG00000074410	CA12
ENSG00000164850	284.307	0.441941	0.0939049	4.70626	2.52302e-06	6.47133e-05	ENSG00000164850	GPER1
ENSG00000075618	5383.36	0.441039	0.119937	3.67727	0.000235743	0.00362591	ENSG00000075618	FSCN1
ENSG00000165685	290.406	0.440832	0.0992757	4.44048	8.97566e-06	0.000201584	ENSG00000165685	TMEM52B
ENSG00000105974	44443.7	0.440339	0.0609261	7.22743	4.92218e-13	4.02171e-11	ENSG00000105974	CAV1
ENSG00000070961	7449.83	0.438897	0.0873761	5.02308	5.08489e-07	1.52016e-05	ENSG00000070961	ATP2B1
ENSG00000073111	852.175	0.438637	0.0966397	4.53889	5.65507e-06	0.000134007	ENSG00000073111	MCM2
ENSG00000176692	89.0519	0.43834	0.142912	3.0672	0.00216076	0.0234476	ENSG00000176692	FOXC2
ENSG00000100092	157.081	0.437954	0.128675	3.40355	0.00066515	0.0088119	ENSG00000100092	SH3BP1
ENSG00000146966	542.624	0.437441	0.085918	5.09138	3.55473e-07	1.08609e-05	ENSG00000146966	DENND2A
ENSG00000006283	13.5551	0.437411	0.154215	2.83637	0.00456291	0.0427129	ENSG00000006283	CACNA1G
ENSG00000131747	2315.47	0.436476	0.0922152	4.73323	2.20975e-06	5.75779e-05	ENSG00000131747	TOP2A
ENSG00000141526	8919.36	0.435926	0.108669	4.01149	6.03362e-05	0.00109387	ENSG00000141526	SLC16A3
ENSG00000250748	19.5173	0.435562	0.153894	2.83027	0.0046509	0.0433116	ENSG00000250748	RP11-230G5.2
ENSG00000137936	1377.12	0.435165	0.0708648	6.14078	8.21156e-10	4.28544e-08	ENSG00000137936	BCAR3
ENSG00000102265	31658.7	0.434784	0.0770764	5.64095	1.69118e-08	6.80125e-07	ENSG00000102265	TIMP1
ENSG00000164442	41078.5	0.434767	0.0647453	6.71504	1.88015e-11	1.29087e-09	ENSG00000164442	CITED2
ENSG00000130751	68.0413	0.434454	0.151081	2.87564	0.00403212	0.0389139	ENSG00000130751	NPAS1
ENSG00000186193	75.754	0.434439	0.15615	2.7822	0.00539924	0.0483842	ENSG00000186193	SAPCD2
ENSG00000100003	464.631	0.434129	0.0839814	5.16935	2.3491e-07	7.40274e-06	ENSG00000100003	SEC14L2
ENSG00000121152	165.815	0.433906	0.135786	3.19552	0.00139581	0.0161358	ENSG00000121152	NCAPH
ENSG00000023171	415.944	0.433818	0.0839622	5.16682	2.38105e-07	7.49035e-06	ENSG00000023171	GRAMD1B
ENSG00000109805	426.47	0.433593	0.109761	3.95036	7.80351e-05	0.00136275	ENSG00000109805	NCAPG
ENSG00000142871	39440.8	0.432633	0.0554887	7.79679	6.35022e-15	6.51511e-13	ENSG00000142871	CYR61
ENSG00000182379	570.681	0.432526	0.103902	4.16283	3.14321e-05	0.000618267	ENSG00000182379	NXPH4
ENSG00000162616	4640.34	0.432103	0.104584	4.13164	3.60188e-05	0.000700852	ENSG00000162616	DNAJB4
ENSG00000164465	3190.89	0.431701	0.0590387	7.31216	2.62879e-13	2.22854e-11	ENSG00000164465	DCBLD1
ENSG00000150687	10576.6	0.430877	0.0769267	5.60113	2.12954e-08	8.41425e-07	ENSG00000150687	PRSS23
ENSG00000134107	1642.66	0.430476	0.0536451	8.02451	1.01929e-15	1.11548e-13	ENSG00000134107	BHLHE40
ENSG00000146094	120.835	0.43046	0.118566	3.63056	0.000282808	0.00425556	ENSG00000146094	DOK3
ENSG00000248641	124.151	0.430403	0.148385	2.90059	0.00372461	0.0367114	ENSG00000248641	HMGA1P2
ENSG00000100739	126.742	0.429998	0.128691	3.34132	0.000833806	0.0106253	ENSG00000100739	BDKRB1
ENSG00000197299	98.2392	0.429904	0.1394	3.08396	0.00204268	0.0223679	ENSG00000197299	BLM
ENSG00000135476	201.941	0.429639	0.104187	4.12371	3.72819e-05	0.000720947	ENSG00000135476	ESPL1
ENSG00000182272	586.115	0.429636	0.127402	3.37228	0.000745492	0.0096914	ENSG00000182272	B4GALNT4
ENSG00000151640	1240.01	0.428643	0.114629	3.7394	0.000184458	0.00291916	ENSG00000151640	DPYSL4
ENSG00000283674	6.79897	0.424797	0.128631	3.30244	0.000958463	0.011903	ENSG00000283674	RP11-419I17.1
ENSG00000106537	208.392	0.424665	0.105243	4.03511	5.45775e-05	0.00100562	ENSG00000106537	TSPAN13
ENSG00000170485	1477.07	0.424513	0.0705175	6.01997	1.74454e-09	8.44534e-08	ENSG00000170485	NPAS2
ENSG00000075702	104.958	0.424427	0.148868	2.85103	0.00435775	0.0413929	ENSG00000075702	WDR62
ENSG00000160957	199.154	0.424369	0.118509	3.58089	0.000342423	0.00496638	ENSG00000160957	RECQL4
ENSG00000131386	439.868	0.42322	0.0968444	4.37011	1.24187e-05	0.000270826	ENSG00000131386	GALNT15
ENSG00000006453	323.699	0.422778	0.0976993	4.32734	1.50918e-05	0.000321739	ENSG00000006453	BAIAP2L1
ENSG00000137804	595.463	0.422649	0.0912659	4.63097	3.6396e-06	9.07738e-05	ENSG00000137804	NUSAP1
ENSG00000123485	358.701	0.422447	0.0958563	4.40709	1.04771e-05	0.000230994	ENSG00000123485	HJURP
ENSG00000127528	395.869	0.422107	0.129361	3.26301	0.00110237	0.0133684	ENSG00000127528	KLF2
ENSG00000106004	106.105	0.42171	0.127009	3.32031	0.000899176	0.0112831	ENSG00000106004	HOXA5
ENSG00000150782	11.9343	0.420341	0.142265	2.95464	0.00313031	0.0318984	ENSG00000150782	IL18
ENSG00000157833	251.667	0.418796	0.0961339	4.35638	1.32232e-05	0.000285954	ENSG00000157833	GAREM2
ENSG00000189410	575.937	0.418492	0.105509	3.9664	7.29657e-05	0.00128165	ENSG00000189410	SH2D5
ENSG00000114270	7185.76	0.418368	0.0991195	4.22084	2.43395e-05	0.000494374	ENSG00000114270	COL7A1
ENSG00000111665	218.116	0.418267	0.104591	3.99906	6.35951e-05	0.00114376	ENSG00000111665	CDCA3
ENSG00000113368	734.473	0.416149	0.111274	3.73985	0.000184132	0.00291655	ENSG00000113368	LMNB1
ENSG00000145526	7.37324	0.416022	0.130814	3.18027	0.00147138	0.0168905	ENSG00000145526	CDH18
ENSG00000214357	139.461	0.415299	0.129104	3.21677	0.00129642	0.0153195	ENSG00000214357	NEURL1B
ENSG00000127423	63.6087	0.415245	0.149036	2.78621	0.00533284	0.0479796	ENSG00000127423	AUNIP
ENSG00000091651	146.549	0.413678	0.119482	3.46226	0.00053566	0.00730545	ENSG00000091651	ORC6
ENSG00000118985	12740.9	0.413152	0.0637654	6.47925	9.2178e-11	5.79951e-09	ENSG00000118985	ELL2
ENSG00000141682	537.925	0.412899	0.0828017	4.9866	6.14506e-07	1.79201e-05	ENSG00000141682	PMAIP1
ENSG00000187678	547.206	0.412258	0.110456	3.73232	0.000189725	0.00298585	ENSG00000187678	SPRY4
ENSG00000140563	330.942	0.411938	0.100204	4.11099	3.93965e-05	0.000755986	ENSG00000140563	MCTP2
ENSG00000167775	850.381	0.411237	0.116399	3.533	0.000410866	0.00577804	ENSG00000167775	CD320
ENSG00000133019	10.9085	0.411204	0.142161	2.89253	0.00382149	0.0374212	ENSG00000133019	CHRM3
ENSG00000092853	198.516	0.410799	0.134294	3.05895	0.00222114	0.0239588	ENSG00000092853	CLSPN
ENSG00000134057	807.403	0.41076	0.100513	4.08664	4.37668e-05	0.000831892	ENSG00000134057	CCNB1
ENSG00000123416	4637.94	0.41076	0.0705954	5.8185	5.93775e-09	2.59608e-07	ENSG00000123416	TUBA1B
ENSG00000180155	462.454	0.410513	0.110214	3.7247	0.000195545	0.0030624	ENSG00000180155	LYNX1
ENSG00000168078	271.317	0.409572	0.124007	3.30282	0.000957165	0.0118951	ENSG00000168078	PBK
ENSG00000115828	295.292	0.409276	0.09889	4.1387	3.49284e-05	0.000681104	ENSG00000115828	QPCT
ENSG00000265681	202.161	0.408266	0.125063	3.26448	0.00109666	0.013326	ENSG00000265681	RPL17
ENSG00000170629	59.2164	0.407768	0.145877	2.79529	0.00518528	0.0470678	ENSG00000170629	DPY19L2P2
ENSG00000104738	1430.34	0.407714	0.0685109	5.95109	2.66368e-09	1.25256e-07	ENSG00000104738	MCM4
ENSG00000185008	1145.6	0.406373	0.0766842	5.2993	1.16245e-07	3.96793e-06	ENSG00000185008	ROBO2
ENSG00000134802	246.193	0.406304	0.0946224	4.29395	1.75519e-05	0.000368958	ENSG00000134802	SLC43A3
ENSG00000011422	2129.94	0.405842	0.0692126	5.8637	4.52667e-09	2.03329e-07	ENSG00000011422	PLAUR
ENSG00000187210	4760.97	0.405273	0.0662791	6.11464	9.67775e-10	4.99289e-08	ENSG00000187210	GCNT1
ENSG00000197747	6279.13	0.404884	0.0717263	5.64485	1.65322e-08	6.70836e-07	ENSG00000197747	S100A10
ENSG00000074842	4454.59	0.404634	0.0604974	6.68845	2.2555e-11	1.53111e-09	ENSG00000074842	MYDGF
ENSG00000106688	994.752	0.404496	0.0802398	5.04109	4.62881e-07	1.39537e-05	ENSG00000106688	SLC1A1
ENSG00000162063	283.401	0.404071	0.107459	3.76023	0.00016976	0.00270076	ENSG00000162063	CCNF
ENSG00000175550	2569.24	0.403331	0.0729245	5.5308	3.18777e-08	1.22995e-06	ENSG00000175550	DRAP1
ENSG00000126787	402.678	0.403188	0.110334	3.65424	0.000257941	0.00391728	ENSG00000126787	DLGAP5
ENSG00000135245	587.888	0.402689	0.103565	3.88827	0.000100961	0.00169902	ENSG00000135245	HILPDA
ENSG00000157510	345.836	0.402226	0.0860189	4.67602	2.9249e-06	7.43843e-05	ENSG00000157510	AFAP1L1
ENSG00000142945	353.882	0.401388	0.0850118	4.72156	2.34039e-06	6.03721e-05	ENSG00000142945	KIF2C
ENSG00000095752	365.048	0.401166	0.132249	3.03342	0.00241801	0.0257745	ENSG00000095752	IL11
ENSG00000165490	124.155	0.401126	0.140833	2.84824	0.00439618	0.0416155	ENSG00000165490	DDIAS
ENSG00000176890	494.453	0.39972	0.103658	3.85612	0.000115199	0.00190839	ENSG00000176890	TYMS
ENSG00000142156	87925	0.399389	0.0999312	3.99664	6.42471e-05	0.00115319	ENSG00000142156	COL6A1
ENSG00000111206	570.18	0.398932	0.0982133	4.06189	4.86763e-05	0.000913668	ENSG00000111206	FOXM1
ENSG00000180914	25933.1	0.39873	0.0617584	6.45629	1.073e-10	6.72751e-09	ENSG00000180914	OXTR
ENSG00000089472	792.965	0.398474	0.0679153	5.86721	4.43185e-09	2.00065e-07	ENSG00000089472	HEPH
ENSG00000106089	150.645	0.398308	0.1399	2.84708	0.00441224	0.041713	ENSG00000106089	STX1A
ENSG00000119943	1286.72	0.397695	0.0933484	4.26033	2.04125e-05	0.000420763	ENSG00000119943	PYROXD2
ENSG00000178531	124.392	0.397206	0.12457	3.18863	0.0014295	0.0164515	ENSG00000178531	CTXN1
ENSG00000143867	506.681	0.396737	0.131643	3.01373	0.00258055	0.0272657	ENSG00000143867	OSR1
ENSG00000158859	218.086	0.396465	0.0965013	4.10839	3.98423e-05	0.000762919	ENSG00000158859	ADAMTS4
ENSG00000142227	4783.81	0.395939	0.0487299	8.12518	4.46703e-16	5.07303e-14	ENSG00000142227	EMP3
ENSG00000079616	311.028	0.394618	0.102426	3.85271	0.000116817	0.00192989	ENSG00000079616	KIF22
ENSG00000173917	77.3542	0.394211	0.140119	2.8134	0.00490203	0.0449776	ENSG00000173917	HOXB2
ENSG00000100629	100.304	0.393917	0.132479	2.97343	0.00294493	0.0302656	ENSG00000100629	CEP128
ENSG00000169258	165.155	0.393594	0.120717	3.26046	0.00111231	0.0134661	ENSG00000169258	GPRIN1
ENSG00000104881	263.205	0.392403	0.136818	2.86807	0.00412983	0.039582	ENSG00000104881	PPP1R13L
ENSG00000179431	522.888	0.392307	0.101113	3.87988	0.000104506	0.0017489	ENSG00000179431	FJX1
ENSG00000054967	108.876	0.391457	0.120079	3.25999	0.00111416	0.0134661	ENSG00000054967	RELT
ENSG00000118193	224.655	0.390608	0.113817	3.4319	0.000599368	0.00804071	ENSG00000118193	KIF14
ENSG00000231943	10.4369	0.388357	0.134232	2.89319	0.00381352	0.0373634	ENSG00000231943	PGM5P4-AS1
ENSG00000111247	162.83	0.387293	0.125421	3.08794	0.0020155	0.0221105	ENSG00000111247	RAD51AP1
ENSG00000180332	14.1669	0.387085	0.134222	2.88392	0.00392759	0.0380707	ENSG00000180332	KCTD4
ENSG00000105355	4714.71	0.386963	0.106486	3.63394	0.000279131	0.00420372	ENSG00000105355	PLIN3
ENSG00000197852	491.613	0.386153	0.0820897	4.70404	2.55066e-06	6.53295e-05	ENSG00000197852	FAM212B
ENSG00000116260	28793	0.385783	0.0771778	4.99862	5.77414e-07	1.70045e-05	ENSG00000116260	QSOX1
ENSG00000166508	1681.48	0.38466	0.0667743	5.7606	8.3815e-09	3.55269e-07	ENSG00000166508	MCM7
ENSG00000095303	10640.1	0.384397	0.0511289	7.51819	5.55395e-14	5.11672e-12	ENSG00000095303	PTGS1
ENSG00000188229	8539.14	0.38438	0.0945245	4.06646	4.77324e-05	0.000896883	ENSG00000188229	TUBB4B
ENSG00000169679	468.205	0.384124	0.0948117	4.05144	5.09035e-05	0.00094699	ENSG00000169679	BUB1
ENSG00000144749	1129.25	0.383651	0.0655572	5.85215	4.8527e-09	2.16358e-07	ENSG00000144749	LRIG1
ENSG00000067840	200.33	0.381244	0.137592	2.77083	0.00559132	0.0499073	ENSG00000067840	PDZD4
ENSG00000260910	236.531	0.380168	0.0951308	3.99626	6.43498e-05	0.00115389	ENSG00000260910	LINC00565
ENSG00000142173	102915	0.37901	0.117768	3.21829	0.00128958	0.0152674	ENSG00000142173	COL6A2
ENSG00000129911	476.907	0.378688	0.120996	3.12976	0.00174952	0.0195006	ENSG00000129911	KLF16
ENSG00000188486	846.78	0.3761	0.108169	3.47697	0.000507119	0.00695824	ENSG00000188486	H2AFX
ENSG00000173535	99.3367	0.375355	0.133097	2.82016	0.0048	0.0442552	ENSG00000173535	TNFRSF10C
ENSG00000012048	455.039	0.375339	0.097984	3.83061	0.000127824	0.00210019	ENSG00000012048	BRCA1
ENSG00000105722	1290.21	0.375313	0.106027	3.53979	0.000400445	0.00564909	ENSG00000105722	ERF
ENSG00000117122	1207.32	0.375143	0.0879441	4.2657	1.99279e-05	0.000411714	ENSG00000117122	MFAP2
ENSG00000167670	447.974	0.374275	0.101688	3.68063	0.000232659	0.00358458	ENSG00000167670	CHAF1A
ENSG00000004660	327.946	0.373028	0.0940076	3.96806	7.24614e-05	0.00127405	ENSG00000004660	CAMKK1
ENSG00000051180	169.313	0.372003	0.13252	2.80714	0.00499831	0.0456754	ENSG00000051180	RAD51
ENSG00000154127	2489.49	0.371864	0.0733897	5.06698	4.04174e-07	1.22658e-05	ENSG00000154127	UBASH3B
ENSG00000168496	572.38	0.370078	0.0993101	3.72649	0.000194165	0.00304344	ENSG00000168496	FEN1
ENSG00000179041	561.963	0.369975	0.098192	3.76788	0.000164643	0.00263326	ENSG00000179041	RRS1
ENSG00000116717	2202.98	0.369152	0.0693571	5.32249	1.02357e-07	3.55436e-06	ENSG00000116717	GADD45A
ENSG00000134013	96405.1	0.369049	0.0709085	5.20459	1.94429e-07	6.27984e-06	ENSG00000134013	LOXL2
ENSG00000170312	420.835	0.368999	0.102562	3.59781	0.000320905	0.00470339	ENSG00000170312	CDK1
ENSG00000167695	1457.63	0.368806	0.0708225	5.20748	1.91426e-07	6.1946e-06	ENSG00000167695	FAM57A
ENSG00000235162	9520.12	0.368805	0.0596999	6.17764	6.5065e-10	3.5071e-08	ENSG00000235162	C12orf75
ENSG00000004776	536.28	0.368779	0.128282	2.87475	0.0040435	0.0389412	ENSG00000004776	HSPB6
ENSG00000176619	3492.38	0.36856	0.10841	3.39968	0.000674655	0.00889215	ENSG00000176619	LMNB2
ENSG00000137812	346.633	0.368272	0.0960495	3.83419	0.000125981	0.00207558	ENSG00000137812	KNL1
ENSG00000041353	166.851	0.368091	0.113922	3.23108	0.00123322	0.0147179	ENSG00000041353	RAB27B
ENSG00000150967	166.881	0.367777	0.131598	2.7947	0.0051948	0.0471133	ENSG00000150967	ABCB9
ENSG00000090889	269.53	0.367771	0.0964234	3.81413	0.000136663	0.0022292	ENSG00000090889	KIF4A
ENSG00000077152	197.836	0.367281	0.110896	3.31193	0.000926548	0.0115543	ENSG00000077152	UBE2T
ENSG00000126562	213.943	0.367102	0.124899	2.93919	0.0032907	0.0332514	ENSG00000126562	WNK4
ENSG00000145386	538.898	0.366904	0.106634	3.4408	0.000580006	0.00783334	ENSG00000145386	CCNA2
ENSG00000164096	3330.38	0.366158	0.087215	4.19834	2.68883e-05	0.000539468	ENSG00000164096	C4orf3
ENSG00000136114	125.468	0.366012	0.127782	2.86434	0.00417874	0.0399447	ENSG00000136114	THSD1
ENSG00000050165	18481.6	0.36581	0.048985	7.46779	8.15552e-14	7.29031e-12	ENSG00000050165	DKK3
ENSG00000128710	176.41	0.365791	0.120659	3.03162	0.00243248	0.0258846	ENSG00000128710	HOXD10
ENSG00000176658	5165.31	0.365514	0.038915	9.39262	5.85232e-21	1.08944e-18	ENSG00000176658	MYO1D
ENSG00000104812	5337.03	0.365434	0.0665739	5.48914	4.03889e-08	1.50994e-06	ENSG00000104812	GYS1
ENSG00000088325	1257.86	0.365431	0.0932875	3.91725	8.95641e-05	0.00153878	ENSG00000088325	TPX2
ENSG00000275216	10.7112	0.364543	0.129719	2.81024	0.00495041	0.0452835	ENSG00000275216	RP11-54H7.4
ENSG00000257704	200.577	0.364531	0.121606	2.99763	0.00272091	0.0284985	ENSG00000257704	INAFM1
ENSG00000121578	2672.3	0.364359	0.0606927	6.00334	1.93297e-09	9.33253e-08	ENSG00000121578	B4GALT4
ENSG00000118503	344.485	0.364224	0.100679	3.61768	0.000297258	0.0044287	ENSG00000118503	TNFAIP3
ENSG00000276107	1011.88	0.363282	0.0745296	4.87432	1.09181e-06	3.04241e-05	ENSG00000276107	CTD-2033D15.2
ENSG00000123178	505.961	0.363265	0.0813671	4.46452	8.02481e-06	0.000181812	ENSG00000123178	SPRYD7
ENSG00000151725	277.298	0.363126	0.117716	3.08477	0.00203708	0.0223201	ENSG00000151725	CENPU
ENSG00000125885	278.009	0.362326	0.0977469	3.70678	0.000209915	0.00325919	ENSG00000125885	MCM8
ENSG00000181104	2690.42	0.360443	0.0629487	5.72598	1.02838e-08	4.30173e-07	ENSG00000181104	F2R
ENSG00000125520	1254.76	0.359926	0.108346	3.322	0.000893733	0.0112461	ENSG00000125520	SLC2A4RG
ENSG00000136928	7.73578	0.359365	0.120259	2.98825	0.0028058	0.0292014	ENSG00000136928	GABBR2
ENSG00000145147	10762.3	0.358476	0.0606379	5.91175	3.38491e-09	1.55922e-07	ENSG00000145147	SLIT2
ENSG00000213683	140.704	0.357936	0.114013	3.13942	0.00169283	0.0189943	ENSG00000213683	AC002056.3
ENSG00000174938	2569.78	0.357911	0.103352	3.46303	0.000534124	0.00729001	ENSG00000174938	SEZ6L2
ENSG00000135617	231.939	0.357383	0.117522	3.041	0.00235797	0.0252089	ENSG00000135617	PRADC1
ENSG00000198826	895.391	0.357347	0.0942454	3.79166	0.000149642	0.00241905	ENSG00000198826	ARHGAP11A
ENSG00000168685	1496.8	0.356712	0.100763	3.5401	0.000399973	0.00564684	ENSG00000168685	IL7R
ENSG00000057294	108.321	0.356416	0.128246	2.77915	0.00545008	0.0488155	ENSG00000057294	PKP2
ENSG00000232434	208.615	0.355997	0.119065	2.98993	0.00279042	0.029058	ENSG00000232434	C9orf172
ENSG00000006327	3231.92	0.35587	0.0900837	3.95043	7.80105e-05	0.00136275	ENSG00000006327	TNFRSF12A
ENSG00000160072	445.732	0.354814	0.0987939	3.59145	0.000328839	0.00479244	ENSG00000160072	ATAD3B
ENSG00000106772	1157.72	0.354226	0.0801744	4.41819	9.95305e-06	0.000220518	ENSG00000106772	PRUNE2
ENSG00000132793	561.169	0.352623	0.0950844	3.70852	0.00020847	0.00324233	ENSG00000132793	LPIN3
ENSG00000188766	260.972	0.352178	0.110116	3.19825	0.00138265	0.0160351	ENSG00000188766	SPRED3
ENSG00000127946	367.784	0.35214	0.103423	3.40485	0.000662014	0.00878323	ENSG00000127946	HIP1
ENSG00000130827	3836.17	0.351801	0.100758	3.49155	0.000480226	0.00663462	ENSG00000130827	PLXNA3
ENSG00000005448	566.969	0.351591	0.0983707	3.57414	0.000351375	0.00506367	ENSG00000005448	WDR54
ENSG00000168268	2900.61	0.351409	0.0852042	4.12431	3.71841e-05	0.000720422	ENSG00000168268	NT5DC2
ENSG00000121898	4599.82	0.351153	0.0528343	6.6463	3.00547e-11	1.99521e-09	ENSG00000121898	CPXM2
ENSG00000253540	129.42	0.350865	0.122764	2.85805	0.00426258	0.0405743	ENSG00000253540	FAM86HP
ENSG00000106665	2765.59	0.35009	0.105201	3.32783	0.000875246	0.0110674	ENSG00000106665	CLIP2
ENSG00000013016	2639.9	0.349794	0.0650881	5.37416	7.6941e-08	2.71883e-06	ENSG00000013016	EHD3
ENSG00000164087	220.292	0.349663	0.110482	3.1649	0.00155138	0.0176295	ENSG00000164087	POC1A
ENSG00000103257	21597.3	0.349317	0.118869	2.93866	0.0032963	0.0332893	ENSG00000103257	SLC7A5
ENSG00000146918	720.927	0.347952	0.0733837	4.74154	2.12095e-06	5.55307e-05	ENSG00000146918	NCAPG2
ENSG00000213290	278.658	0.34731	0.108471	3.20187	0.0013654	0.0159167	ENSG00000213290	PGK1P2
ENSG00000105738	975.188	0.3469	0.108809	3.18816	0.0014318	0.0164675	ENSG00000105738	SIPA1L3
ENSG00000083444	32164.3	0.346664	0.0698356	4.96399	6.9059e-07	1.99201e-05	ENSG00000083444	PLOD1
ENSG00000107295	187.456	0.346528	0.108365	3.19778	0.0013849	0.0160507	ENSG00000107295	SH3GL2
ENSG00000189320	358.714	0.345982	0.0980906	3.52717	0.000420028	0.00588854	ENSG00000189320	FAM180A
ENSG00000092470	270.541	0.345179	0.10535	3.27651	0.001051	0.0128489	ENSG00000092470	WDR76
ENSG00000072786	2096.94	0.345101	0.073066	4.72315	2.32221e-06	6.00748e-05	ENSG00000072786	STK10
ENSG00000186792	249.413	0.344392	0.10691	3.22131	0.00127606	0.0151666	ENSG00000186792	HYAL3
ENSG00000067082	4310.87	0.343947	0.0674826	5.09682	3.45408e-07	1.05892e-05	ENSG00000067082	KLF6
ENSG00000178999	177.046	0.343258	0.117369	2.92459	0.00344905	0.034523	ENSG00000178999	AURKB
ENSG00000120549	1355.76	0.342683	0.0576515	5.94403	2.78095e-09	1.3043e-07	ENSG00000120549	KIAA1217
ENSG00000114023	1562.67	0.341672	0.0698989	4.88809	1.01821e-06	2.85052e-05	ENSG00000114023	FAM162A
ENSG00000050344	1319.14	0.341451	0.0841017	4.05998	4.90775e-05	0.000920242	ENSG00000050344	NFE2L3
ENSG00000108854	5673.08	0.340113	0.0708547	4.80015	1.58546e-06	4.235e-05	ENSG00000108854	SMURF2
ENSG00000163808	220.995	0.339009	0.120564	2.81187	0.00492547	0.045101	ENSG00000163808	KIF15
ENSG00000174791	584.479	0.33885	0.115397	2.93639	0.00332055	0.0334948	ENSG00000174791	RIN1
ENSG00000130584	158.453	0.338742	0.119216	2.84143	0.00449121	0.0422165	ENSG00000130584	ZBTB46
ENSG00000244405	1171.32	0.338675	0.0832479	4.06828	4.73623e-05	0.000891785	ENSG00000244405	ETV5
ENSG00000026025	41440.4	0.338604	0.063765	5.31019	1.09508e-07	3.76594e-06	ENSG00000026025	VIM
ENSG00000117411	2944	0.338595	0.0739403	4.5793	4.66533e-06	0.000113228	ENSG00000117411	B4GALT2
ENSG00000101160	12726.1	0.338538	0.0527548	6.4172	1.38805e-10	8.49629e-09	ENSG00000101160	CTSZ
ENSG00000182636	2195.99	0.337691	0.0650845	5.1885	2.11993e-07	6.77444e-06	ENSG00000182636	NDN
ENSG00000196428	1779.99	0.337593	0.0569517	5.9277	3.07199e-09	1.42966e-07	ENSG00000196428	TSC22D2
ENSG00000185022	1349.77	0.33669	0.101593	3.31412	0.000919325	0.011496	ENSG00000185022	MAFF
ENSG00000082482	818.571	0.335786	0.077998	4.30506	1.66938e-05	0.00035259	ENSG00000082482	KCNK2
ENSG00000135424	1601.73	0.3343	0.0865254	3.8636	0.000111728	0.00185771	ENSG00000135424	ITGA7
ENSG00000115318	1912.5	0.334085	0.0732776	4.55917	5.13553e-06	0.000122662	ENSG00000115318	LOXL3
ENSG00000253846	368.23	0.334052	0.0957098	3.49026	0.00048255	0.00665654	ENSG00000253846	PCDHGA10
ENSG00000069667	678.798	0.333726	0.108474	3.07656	0.00209406	0.0228336	ENSG00000069667	RORA
ENSG00000133805	647.766	0.333582	0.0785163	4.24857	2.15138e-05	0.000440447	ENSG00000133805	AMPD3
ENSG00000120594	314.105	0.332703	0.100186	3.32084	0.000897462	0.0112694	ENSG00000120594	PLXDC2
ENSG00000145431	2068.38	0.331953	0.0785602	4.22547	2.38445e-05	0.000485959	ENSG00000145431	PDGFC
ENSG00000157456	353.81	0.331412	0.105596	3.1385	0.00169815	0.019022	ENSG00000157456	CCNB2
ENSG00000124762	12815.1	0.33096	0.0813497	4.06836	4.73442e-05	0.000891785	ENSG00000124762	CDKN1A
ENSG00000040275	777.006	0.330658	0.119065	2.77711	0.00548441	0.04905	ENSG00000040275	SPDL1
ENSG00000138835	1832.57	0.330345	0.0673237	4.90681	9.25692e-07	2.61175e-05	ENSG00000138835	RGS3
ENSG00000145912	564.07	0.330158	0.102865	3.20963	0.00132907	0.015594	ENSG00000145912	NHP2
ENSG00000068028	1384.36	0.328981	0.0732042	4.49401	6.98931e-06	0.000161803	ENSG00000068028	RASSF1
ENSG00000123473	353.232	0.328691	0.105078	3.12806	0.00175964	0.0196014	ENSG00000123473	STIL
ENSG00000136002	1108.03	0.328063	0.0932195	3.51925	0.000432761	0.00604027	ENSG00000136002	ARHGEF4
ENSG00000115963	23181.3	0.326576	0.0785146	4.15942	3.19051e-05	0.000626889	ENSG00000115963	RND3
ENSG00000121297	1086.74	0.326463	0.0617178	5.2896	1.22583e-07	4.16067e-06	ENSG00000121297	TSHZ3
ENSG00000162433	2934.55	0.325687	0.102929	3.1642	0.00155508	0.0176382	ENSG00000162433	AK4
ENSG00000117308	646.866	0.324205	0.104783	3.09407	0.00197428	0.0217111	ENSG00000117308	GALE
ENSG00000141959	7074	0.323886	0.115014	2.81605	0.00486188	0.0447457	ENSG00000141959	PFKL
ENSG00000176014	14461.1	0.323797	0.0871417	3.71575	0.000202601	0.00315922	ENSG00000176014	TUBB6
ENSG00000110811	3471.03	0.322779	0.102325	3.15444	0.00160807	0.0181708	ENSG00000110811	P3H3
ENSG00000214110	4682.97	0.322689	0.0585698	5.50948	3.59887e-08	1.36523e-06	ENSG00000214110	LDHAP4
ENSG00000187123	645.672	0.322556	0.0711431	4.5339	5.79044e-06	0.000136677	ENSG00000187123	LYPD6
ENSG00000221829	322.386	0.321739	0.0887994	3.62321	0.000290969	0.00434936	ENSG00000221829	FANCG
ENSG00000185652	487.846	0.321625	0.0910024	3.53425	0.000408931	0.0057598	ENSG00000185652	NTF3
ENSG00000144136	2697.29	0.320642	0.0527744	6.07572	1.23432e-09	6.15693e-08	ENSG00000144136	SLC20A1
ENSG00000197358	2468.39	0.32043	0.0710704	4.50863	6.52483e-06	0.000152615	ENSG00000197358	BNIP3P1
ENSG00000185624	49655.9	0.319909	0.0614947	5.20222	1.96919e-07	6.33827e-06	ENSG00000185624	P4HB
ENSG00000115363	710.555	0.319401	0.077724	4.10942	3.96647e-05	0.000760324	ENSG00000115363	EVA1A
ENSG00000132646	2061.99	0.31868	0.0630586	5.05372	4.33298e-07	1.31056e-05	ENSG00000132646	PCNA
ENSG00000183258	2108.56	0.318454	0.0704873	4.51789	6.2458e-06	0.000146659	ENSG00000183258	DDX41
ENSG00000168621	283.5	0.318379	0.0981023	3.24538	0.00117294	0.0140729	ENSG00000168621	GDNF
ENSG00000170558	24242.8	0.318357	0.0516083	6.1687	6.88524e-10	3.68922e-08	ENSG00000170558	CDH2
ENSG00000141522	7235.17	0.317838	0.112395	2.82786	0.00468607	0.0434542	ENSG00000141522	ARHGDIA
ENSG00000137807	861.989	0.317584	0.0791938	4.01021	6.06653e-05	0.00109763	ENSG00000137807	KIF23
ENSG00000197208	238.597	0.31746	0.112907	2.81169	0.00492819	0.045103	ENSG00000197208	SLC22A4
ENSG00000173457	1153.93	0.317323	0.0983788	3.22552	0.00125745	0.014968	ENSG00000173457	PPP1R14B
ENSG00000105321	584.055	0.316534	0.103988	3.04396	0.00233485	0.0250464	ENSG00000105321	CCDC9
ENSG00000161638	21788.9	0.315418	0.0520012	6.06559	1.31474e-09	6.52205e-08	ENSG00000161638	ITGA5
ENSG00000154027	630.193	0.3153	0.0813754	3.87463	0.000106786	0.00177881	ENSG00000154027	AK5
ENSG00000123146	3561.53	0.313917	0.0786919	3.98919	6.63004e-05	0.00118299	ENSG00000123146	ADGRE5
ENSG00000214391	380.61	0.31382	0.0852761	3.68005	0.000233189	0.00358968	ENSG00000214391	TUBAP2
ENSG00000188215	1257.77	0.31361	0.070839	4.42709	9.55145e-06	0.000212664	ENSG00000188215	DCUN1D3
ENSG00000129048	2073.42	0.313373	0.0866592	3.61616	0.000299007	0.00445108	ENSG00000129048	ACKR4
ENSG00000149636	299.479	0.313165	0.105354	2.97249	0.00295391	0.0303406	ENSG00000149636	DSN1
ENSG00000157168	709.236	0.312859	0.0943447	3.31613	0.000912745	0.0114216	ENSG00000157168	NRG1
ENSG00000245571	184.17	0.312572	0.10933	2.85897	0.0042502	0.0404992	ENSG00000245571	AP001258.4
ENSG00000151693	1606.37	0.311814	0.0626639	4.97598	6.49184e-07	1.88462e-05	ENSG00000151693	ASAP2
ENSG00000144655	635.227	0.308126	0.101205	3.04456	0.00233023	0.025016	ENSG00000144655	CSRNP1
ENSG00000154721	411.797	0.306896	0.106049	2.89392	0.00380465	0.037317	ENSG00000154721	JAM2
ENSG00000170779	358.412	0.306616	0.103781	2.95444	0.00313239	0.0319017	ENSG00000170779	CDCA4
ENSG00000074800	68208.4	0.306214	0.0505663	6.05571	1.39804e-09	6.87858e-08	ENSG00000074800	ENO1
ENSG00000151414	22176.1	0.305362	0.0771272	3.9592	7.52028e-05	0.00131967	ENSG00000151414	NEK7
ENSG00000171992	3820.56	0.305351	0.0526494	5.79971	6.64302e-09	2.86969e-07	ENSG00000171992	SYNPO
ENSG00000184164	1568.32	0.304515	0.0970085	3.13906	0.00169491	0.0189975	ENSG00000184164	CRELD2
ENSG00000139278	1764.85	0.304173	0.0757023	4.01801	5.86914e-05	0.00106745	ENSG00000139278	GLIPR1
ENSG00000102760	475.777	0.304062	0.107504	2.82839	0.00467831	0.0434128	ENSG00000102760	RGCC
ENSG00000136999	1360.54	0.303448	0.0841031	3.60804	0.000308519	0.00456259	ENSG00000136999	NOV
ENSG00000117525	12688.6	0.303138	0.0736384	4.11657	3.84548e-05	0.000741065	ENSG00000117525	F3
ENSG00000167553	4456.35	0.302912	0.0678167	4.46663	7.94602e-06	0.000180481	ENSG00000167553	TUBA1C
ENSG00000163545	449.098	0.302339	0.0963397	3.13826	0.00169955	0.0190259	ENSG00000163545	NUAK2
ENSG00000014138	347.225	0.302138	0.100364	3.01042	0.00260889	0.0275328	ENSG00000014138	POLA2
ENSG00000170525	3165.33	0.301986	0.0515823	5.85446	4.78576e-09	2.13902e-07	ENSG00000170525	PFKFB3
ENSG00000159259	238.595	0.301728	0.103894	2.9042	0.00368187	0.0364293	ENSG00000159259	CHAF1B
ENSG00000054148	1681.21	0.301683	0.100191	3.01107	0.0026033	0.02749	ENSG00000054148	PHPT1
ENSG00000166484	997.711	0.300903	0.100612	2.99072	0.00278319	0.0289994	ENSG00000166484	MAPK7
ENSG00000127589	3711.01	0.300451	0.0471064	6.37813	1.79258e-10	1.07895e-08	ENSG00000127589	TUBBP1
ENSG00000179967	1594.39	0.2997	0.0850102	3.52546	0.000422751	0.00591414	ENSG00000179967	PPP1R14BP3
ENSG00000171488	475.04	0.29798	0.084166	3.54038	0.000399544	0.0056452	ENSG00000171488	LRRC8C
ENSG00000164649	1142.61	0.297244	0.0674701	4.40557	1.05508e-05	0.000232335	ENSG00000164649	CDCA7L
ENSG00000102144	38703.6	0.297081	0.0553601	5.36634	8.03496e-08	2.81177e-06	ENSG00000102144	PGK1
ENSG00000140525	528.065	0.296949	0.08356	3.55372	0.00037983	0.00539621	ENSG00000140525	FANCI
ENSG00000109680	1008.08	0.296846	0.0887537	3.3446	0.000824003	0.0105226	ENSG00000109680	TBC1D19
ENSG00000135404	31586.1	0.296109	0.0366449	8.08048	6.45105e-16	7.23519e-14	ENSG00000135404	CD63
ENSG00000015532	1757.97	0.296054	0.102578	2.88613	0.00390012	0.0379647	ENSG00000015532	XYLT2
ENSG00000226415	13804.2	0.296037	0.0543645	5.44541	5.16868e-08	1.90083e-06	ENSG00000226415	TPI1P1
ENSG00000106397	7627.25	0.29547	0.105288	2.80631	0.00501117	0.0457697	ENSG00000106397	PLOD3
ENSG00000177830	3742.48	0.295115	0.0946306	3.1186	0.00181711	0.0200928	ENSG00000177830	CHID1
ENSG00000025772	1548.61	0.294621	0.0534921	5.50774	3.63466e-08	1.37591e-06	ENSG00000025772	TOMM34
ENSG00000142197	1654.35	0.294593	0.063506	4.63882	3.50412e-06	8.77586e-05	ENSG00000142197	DOPEY2
ENSG00000116883	298.023	0.29413	0.0902205	3.26012	0.00111364	0.0134661	ENSG00000116883	RP11-268J15.5
ENSG00000142669	7770.03	0.293093	0.0712904	4.11126	3.93507e-05	0.000755911	ENSG00000142669	SH3BGRL3
ENSG00000160789	25836	0.292598	0.104621	2.79673	0.00516228	0.0469362	ENSG00000160789	LMNA
ENSG00000101199	4350.82	0.29208	0.0983143	2.97088	0.00296945	0.0304468	ENSG00000101199	ARFGAP1
ENSG00000168393	548.037	0.29055	0.0786013	3.6965	0.00021859	0.00338805	ENSG00000168393	DTYMK
ENSG00000165527	6906.97	0.289575	0.0711574	4.0695	4.71144e-05	0.000889901	ENSG00000165527	ARF6
ENSG00000134222	264.958	0.289495	0.100546	2.87922	0.00398657	0.0384949	ENSG00000134222	PSRC1
ENSG00000213080	892.411	0.289364	0.0735782	3.93274	8.39838e-05	0.00145537	ENSG00000213080	RP11-312J18.5
ENSG00000130066	987.506	0.289346	0.0729088	3.9686	7.22956e-05	0.0012736	ENSG00000130066	SAT1
ENSG00000149503	484.995	0.288348	0.101345	2.84521	0.0044382	0.0418761	ENSG00000149503	INCENP
ENSG00000164136	302.069	0.288281	0.0993004	2.90312	0.00369465	0.0365158	ENSG00000164136	IL15
ENSG00000160570	657.959	0.287859	0.0802854	3.58544	0.000336511	0.00489241	ENSG00000160570	DEDD2
ENSG00000104221	235.785	0.287198	0.101494	2.82972	0.00465892	0.043364	ENSG00000104221	BRF2
ENSG00000197019	499.6	0.287198	0.0919971	3.12182	0.00179738	0.0199561	ENSG00000197019	SERTAD1
ENSG00000100196	4417.05	0.287188	0.0649721	4.42017	9.8622e-06	0.000219043	ENSG00000100196	KDELR3
ENSG00000103187	10026.1	0.287114	0.0673691	4.2618	2.02784e-05	0.000418477	ENSG00000103187	COTL1
ENSG00000033011	643.07	0.287008	0.101498	2.82773	0.00468787	0.0434542	ENSG00000033011	ALG1
ENSG00000147100	7985.41	0.286949	0.0508994	5.63756	1.72476e-08	6.9209e-07	ENSG00000147100	SLC16A2
ENSG00000136026	26158.3	0.286837	0.0442683	6.4795	9.20257e-11	5.79951e-09	ENSG00000136026	CKAP4
ENSG00000122042	3107.58	0.286627	0.070771	4.05007	5.12025e-05	0.000951198	ENSG00000122042	UBL3
ENSG00000157045	907.129	0.286423	0.0717024	3.99461	6.47996e-05	0.0011608	ENSG00000157045	NTAN1
ENSG00000105329	2343.61	0.286411	0.0977209	2.93091	0.00337967	0.0339414	ENSG00000105329	TGFB1
ENSG00000167552	20021.9	0.286011	0.0402932	7.09825	1.26347e-12	9.9193e-11	ENSG00000167552	TUBA1A
ENSG00000115226	338.166	0.285956	0.0896709	3.18895	0.00142792	0.0164439	ENSG00000115226	FNDC4
ENSG00000104723	3026.48	0.285685	0.0652378	4.37913	1.19153e-05	0.000260792	ENSG00000104723	TUSC3
ENSG00000169126	808.248	0.285451	0.0841855	3.39073	0.00069706	0.00915405	ENSG00000169126	ARMC4
ENSG00000170037	949.492	0.285277	0.0728615	3.91533	9.02814e-05	0.00154816	ENSG00000170037	CNTROB
ENSG00000176171	7091.61	0.281789	0.0845947	3.33105	0.000865194	0.0109658	ENSG00000176171	BNIP3
ENSG00000109472	641.661	0.281627	0.0766666	3.67339	0.000239351	0.00367202	ENSG00000109472	CPE
ENSG00000182158	6040.57	0.281593	0.0508013	5.54302	2.97295e-08	1.15199e-06	ENSG00000182158	CREB3L2
ENSG00000123131	5116.64	0.280911	0.0480163	5.85034	4.9058e-09	2.17651e-07	ENSG00000123131	PRDX4
ENSG00000144354	341.249	0.280659	0.0853078	3.28995	0.00100205	0.0123846	ENSG00000144354	CDCA7
ENSG00000125675	1268.65	0.2802	0.0744931	3.76143	0.000168947	0.00269124	ENSG00000125675	GRIA3
ENSG00000079156	307.789	0.279232	0.097316	2.86934	0.00411333	0.0394448	ENSG00000079156	OSBPL6
ENSG00000188153	555.701	0.279163	0.0868447	3.21451	0.00130669	0.0154013	ENSG00000188153	COL4A5
ENSG00000145050	2267.86	0.278906	0.0594728	4.68964	2.73682e-06	6.97019e-05	ENSG00000145050	MANF
ENSG00000177542	657.889	0.278858	0.0989774	2.81739	0.0048415	0.0445808	ENSG00000177542	SLC25A22
ENSG00000166557	4639.18	0.278212	0.0504767	5.51169	3.55403e-08	1.3535e-06	ENSG00000166557	TMED3
ENSG00000115652	2071.89	0.277338	0.0561479	4.93941	7.83585e-07	2.23173e-05	ENSG00000115652	UXS1
ENSG00000067225	85237.4	0.277313	0.0622605	4.45408	8.42545e-06	0.000190173	ENSG00000067225	PKM
ENSG00000034510	37118.1	0.27705	0.0681173	4.06725	4.75702e-05	0.000894765	ENSG00000034510	TMSB10
ENSG00000143537	4169.63	0.276562	0.0948881	2.91461	0.00356135	0.0354926	ENSG00000143537	ADAM15
ENSG00000142949	17037.7	0.276143	0.0839265	3.2903	0.00100082	0.012378	ENSG00000142949	PTPRF
ENSG00000198805	429.515	0.276112	0.0880126	3.13719	0.00170575	0.0190599	ENSG00000198805	PNP
ENSG00000144959	783.17	0.274265	0.082687	3.3169	0.000910227	0.011398	ENSG00000144959	NCEH1
ENSG00000196230	38324.4	0.274235	0.0416399	6.58587	4.52236e-11	2.93742e-09	ENSG00000196230	TUBB
ENSG00000137267	2249.99	0.273482	0.0850096	3.21708	0.00129503	0.0153139	ENSG00000137267	TUBB2A
ENSG00000173530	3482.34	0.272803	0.0463948	5.88002	4.10217e-09	1.85646e-07	ENSG00000173530	TNFRSF10D
ENSG00000158042	1807.25	0.27277	0.0546603	4.99028	6.0291e-07	1.76161e-05	ENSG00000158042	MRPL17
ENSG00000138771	2788.22	0.272756	0.0623509	4.37453	1.21693e-05	0.000265708	ENSG00000138771	SHROOM3
ENSG00000135723	955.576	0.272535	0.0841155	3.24001	0.00119525	0.0143216	ENSG00000135723	FHOD1
ENSG00000170425	470.232	0.272067	0.083821	3.24581	0.00117118	0.0140632	ENSG00000170425	ADORA2B
ENSG00000180611	801.015	0.271428	0.0854157	3.17773	0.00148434	0.016996	ENSG00000180611	MB21D2
ENSG00000272695	583.634	0.271277	0.0871249	3.11365	0.00184786	0.0203954	ENSG00000272695	GAS6-AS2
ENSG00000099331	4078.91	0.271153	0.082533	3.28539	0.00101841	0.0125183	ENSG00000099331	MYO9B
ENSG00000103742	688.819	0.271057	0.0732854	3.69865	0.000216749	0.00336241	ENSG00000103742	IGDCC4
ENSG00000080839	364.244	0.271012	0.0943702	2.87179	0.00408151	0.0392051	ENSG00000080839	RBL1
ENSG00000171067	3671.55	0.269731	0.0620421	4.34756	1.37663e-05	0.000296279	ENSG00000171067	C11orf24
ENSG00000135046	34983.2	0.269692	0.06447	4.18321	2.87419e-05	0.000572208	ENSG00000135046	ANXA1
ENSG00000177239	4458.83	0.269667	0.0809619	3.33079	0.000865989	0.0109658	ENSG00000177239	MAN1B1
ENSG00000128294	966.818	0.26875	0.0619457	4.33848	1.43469e-05	0.000307309	ENSG00000128294	TPST2
ENSG00000167123	7434.68	0.268729	0.0925997	2.90205	0.00370728	0.0365805	ENSG00000167123	CERCAM
ENSG00000105220	11071.4	0.26842	0.0507504	5.28903	1.22968e-07	4.16593e-06	ENSG00000105220	GPI
ENSG00000111669	22172.2	0.267415	0.0511267	5.23044	1.69109e-07	5.54193e-06	ENSG00000111669	TPI1
ENSG00000107130	3771.35	0.267111	0.0776812	3.43856	0.000584821	0.00788656	ENSG00000107130	NCS1
ENSG00000117592	24097.6	0.265626	0.0479063	5.5447	2.94462e-08	1.14346e-06	ENSG00000117592	PRDX6
ENSG00000173486	1148.4	0.26562	0.0950558	2.79436	0.0052002	0.0471239	ENSG00000173486	FKBP2
ENSG00000166886	2183.5	0.265109	0.0568554	4.66286	3.11845e-06	7.86451e-05	ENSG00000166886	NAB2
ENSG00000186918	2882.61	0.264633	0.0780526	3.39044	0.0006978	0.00915711	ENSG00000186918	ZNF395
ENSG00000109107	1108.16	0.263981	0.0808442	3.26531	0.00109345	0.013296	ENSG00000109107	ALDOC
ENSG00000171914	1687.87	0.263939	0.069896	3.77617	0.000159258	0.00255619	ENSG00000171914	TLN2
ENSG00000100234	39806.4	0.263928	0.0674598	3.91237	9.13929e-05	0.00156425	ENSG00000100234	TIMP3
ENSG00000145555	2852.38	0.263272	0.0623813	4.22037	2.43907e-05	0.000494856	ENSG00000145555	MYO10
ENSG00000115232	5349.39	0.263104	0.0704015	3.7372	0.000186083	0.0029423	ENSG00000115232	ITGA4
ENSG00000188643	6370.46	0.26302	0.0671948	3.91429	9.06707e-05	0.00155336	ENSG00000188643	S100A16
ENSG00000122884	21065.9	0.26279	0.0817091	3.21616	0.00129917	0.0153325	ENSG00000122884	P4HA1
ENSG00000120725	1841.83	0.262441	0.0837185	3.1348	0.00171972	0.0191922	ENSG00000120725	SIL1
ENSG00000213025	376.468	0.262361	0.0819842	3.20014	0.0013736	0.0159849	ENSG00000213025	COX20P1
ENSG00000104998	412.869	0.262357	0.0900964	2.91196	0.00359168	0.0356738	ENSG00000104998	IL27RA
ENSG00000177084	852.619	0.261995	0.084489	3.10093	0.00192912	0.0212403	ENSG00000177084	POLE
ENSG00000085063	20047.3	0.261884	0.0494013	5.30116	1.15072e-07	3.93533e-06	ENSG00000085063	CD59
ENSG00000111640	95912.8	0.261843	0.0600797	4.35826	1.31101e-05	0.000284188	ENSG00000111640	GAPDH
ENSG00000078808	9192.37	0.26172	0.0786272	3.32861	0.000872797	0.0110442	ENSG00000078808	SDF4
ENSG00000177150	848.076	0.261437	0.0733719	3.56318	0.000366389	0.00525487	ENSG00000177150	FAM210A
ENSG00000177363	759.297	0.261238	0.0880721	2.96618	0.00301519	0.0308297	ENSG00000177363	LRRN4CL
ENSG00000167397	710.858	0.261028	0.0768433	3.39689	0.00068157	0.0089702	ENSG00000167397	VKORC1
ENSG00000114480	7326.38	0.260497	0.0717638	3.62993	0.000283502	0.00426244	ENSG00000114480	GBE1
ENSG00000138685	17664.2	0.260399	0.056019	4.64841	3.34506e-06	8.39827e-05	ENSG00000138685	FGF2
ENSG00000109084	2001.72	0.260314	0.0726154	3.58484	0.000337289	0.00489978	ENSG00000109084	TMEM97
ENSG00000149925	42451.1	0.260075	0.0874631	2.97354	0.00294385	0.0302656	ENSG00000149925	ALDOA
ENSG00000102172	1046.16	0.259653	0.0853707	3.04148	0.00235421	0.0251986	ENSG00000102172	SMS
ENSG00000118523	24838.6	0.259181	0.0782529	3.3121	0.000925999	0.0115543	ENSG00000118523	CTGF
ENSG00000070371	586.757	0.259015	0.0917887	2.82186	0.00477454	0.0440992	ENSG00000070371	CLTCL1
ENSG00000185551	9809.18	0.258631	0.0649855	3.97983	6.89648e-05	0.00122088	ENSG00000185551	NR2F2
ENSG00000133816	8800.11	0.258027	0.0565635	4.56172	5.07353e-06	0.000121341	ENSG00000133816	MICAL2
ENSG00000116863	1208.35	0.257449	0.0792928	3.24681	0.00116707	0.0140398	ENSG00000116863	ADPRHL2
ENSG00000071575	556.143	0.25648	0.0918119	2.79354	0.00521351	0.0472118	ENSG00000071575	TRIB2
ENSG00000089327	4740.24	0.256327	0.0799812	3.20484	0.00135139	0.0157943	ENSG00000089327	FXYD5
ENSG00000183684	1012.64	0.25587	0.0769058	3.32705	0.000877698	0.0110907	ENSG00000183684	ALYREF
ENSG00000154734	38487	0.254359	0.0471114	5.39909	6.69799e-08	2.40448e-06	ENSG00000154734	ADAMTS1
ENSG00000005238	1237.54	0.254176	0.0672238	3.78105	0.000156171	0.00251559	ENSG00000005238	FAM214B
ENSG00000134369	6383.02	0.254066	0.0508999	4.99147	5.99215e-07	1.75365e-05	ENSG00000134369	NAV1
ENSG00000182963	1274.41	0.253943	0.0590615	4.29963	1.71082e-05	0.000360471	ENSG00000182963	GJC1
ENSG00000117298	15323.1	0.253927	0.0661704	3.83746	0.000124311	0.00204994	ENSG00000117298	ECE1
ENSG00000103489	1370.82	0.253878	0.0653641	3.88406	0.000102728	0.00172271	ENSG00000103489	XYLT1
ENSG00000132688	15319.9	0.253718	0.051326	4.94327	7.68229e-07	2.19492e-05	ENSG00000132688	NES
ENSG00000124145	16652.8	0.25349	0.0762918	3.32264	0.000891684	0.011236	ENSG00000124145	SDC4
ENSG00000198053	7067.66	0.251288	0.0781775	3.21432	0.00130754	0.0154013	ENSG00000198053	SIRPA
ENSG00000090020	3734.54	0.250069	0.0772548	3.23694	0.00120821	0.014454	ENSG00000090020	SLC9A1
ENSG00000143549	12069.9	0.248844	0.0434598	5.72585	1.02916e-08	4.30173e-07	ENSG00000143549	TPM3
ENSG00000117632	3749.48	0.247509	0.0663101	3.7326	0.000189511	0.00298585	ENSG00000117632	STMN1
ENSG00000125817	3208.59	0.246693	0.0810468	3.04384	0.00233583	0.0250464	ENSG00000125817	CENPB
ENSG00000148926	16158.5	0.246295	0.06125	4.02113	5.79189e-05	0.00105747	ENSG00000148926	ADM
ENSG00000145545	744.394	0.24544	0.0712486	3.44484	0.000571408	0.00774037	ENSG00000145545	SRD5A1
ENSG00000181458	3626.94	0.245385	0.0843962	2.90754	0.00364283	0.0361024	ENSG00000181458	TMEM45A
ENSG00000119684	497.725	0.243878	0.0761587	3.20223	0.00136369	0.0159071	ENSG00000119684	MLH3
ENSG00000112118	1544.4	0.243703	0.0655497	3.71784	0.000200935	0.00313594	ENSG00000112118	MCM3
ENSG00000167325	2099.52	0.242856	0.0598823	4.05555	5.00161e-05	0.000932996	ENSG00000167325	RRM1
ENSG00000162783	2118.32	0.242806	0.062983	3.85511	0.000115678	0.00191457	ENSG00000162783	IER5
ENSG00000182240	5655.87	0.242621	0.0407174	5.95867	2.54299e-09	1.19892e-07	ENSG00000182240	BACE2
ENSG00000080573	2764.9	0.242515	0.0737478	3.28844	0.00100744	0.0124258	ENSG00000080573	COL5A3
ENSG00000141696	2714.65	0.24188	0.083654	2.89143	0.00383495	0.0375304	ENSG00000141696	P3H4
ENSG00000109220	792.073	0.241765	0.0790291	3.05919	0.00221937	0.0239549	ENSG00000109220	CHIC2
ENSG00000053372	1435.35	0.241693	0.0578889	4.17513	2.97819e-05	0.000590309	ENSG00000053372	MRTO4
ENSG00000278259	780.381	0.241425	0.0819515	2.94595	0.00321964	0.0326063	ENSG00000278259	MYO19
ENSG00000232499	635.583	0.241188	0.0714481	3.37571	0.000736259	0.00959901	ENSG00000232499	RP11-512F24.1
ENSG00000134954	6394.69	0.241153	0.049223	4.8992	9.62301e-07	2.70658e-05	ENSG00000134954	ETS1
ENSG00000172301	1459.64	0.241091	0.0614173	3.92546	8.65649e-05	0.00149293	ENSG00000172301	COPRS
ENSG00000204520	1182.08	0.240632	0.0604672	3.97954	6.90499e-05	0.00122119	ENSG00000204520	MICA
ENSG00000134333	74653.9	0.240459	0.0690018	3.48482	0.000492468	0.00677265	ENSG00000134333	LDHA
ENSG00000124733	1775.49	0.240011	0.0751442	3.19401	0.00140313	0.0161996	ENSG00000124733	MEA1
ENSG00000186866	3617.92	0.239898	0.0436548	5.49534	3.89967e-08	1.46701e-06	ENSG00000186866	POFUT2
ENSG00000143870	17801.3	0.23923	0.0372102	6.42917	1.28304e-10	7.96145e-09	ENSG00000143870	PDIA6
ENSG00000099385	710.121	0.237353	0.0797122	2.97762	0.00290494	0.029974	ENSG00000099385	BCL7C
ENSG00000110841	4189.38	0.237219	0.0702846	3.37512	0.000737842	0.00961271	ENSG00000110841	PPFIBP1
ENSG00000113734	313.087	0.236392	0.0848523	2.78592	0.00533762	0.0479987	ENSG00000113734	BNIP1
ENSG00000256235	2088.78	0.236237	0.0473768	4.98635	6.15301e-07	1.79201e-05	ENSG00000256235	SMIM3
ENSG00000268034	980.857	0.236213	0.0620555	3.80647	0.000140962	0.00229311	ENSG00000268034	AC005795.1
ENSG00000116871	4953.84	0.235921	0.0850691	2.77329	0.00554926	0.0495809	ENSG00000116871	MAP7D1
ENSG00000070495	1054.78	0.235733	0.0707446	3.33217	0.000861707	0.0109345	ENSG00000070495	JMJD6
ENSG00000065485	1604.89	0.23538	0.0558307	4.21596	2.48712e-05	0.000503475	ENSG00000065485	PDIA5
ENSG00000101109	2259.26	0.233032	0.0676769	3.4433	0.000574654	0.00777851	ENSG00000101109	STK4
ENSG00000049541	420.192	0.23208	0.0804425	2.88504	0.00391365	0.0380454	ENSG00000049541	RFC2
ENSG00000110880	21420.2	0.231014	0.0444637	5.19557	2.04091e-07	6.54577e-06	ENSG00000110880	CORO1C
ENSG00000171812	1570.38	0.231003	0.0831722	2.7774	0.00547951	0.0490304	ENSG00000171812	COL8A2
ENSG00000167778	1938.68	0.230064	0.0725091	3.1729	0.00150927	0.0172268	ENSG00000167778	SPRYD3
ENSG00000102901	889.943	0.229352	0.0717014	3.19871	0.00138042	0.0160195	ENSG00000102901	CENPT
ENSG00000237264	3729.42	0.22923	0.0590191	3.884	0.00010275	0.00172271	ENSG00000237264	FTH1P11
ENSG00000119655	2897.1	0.229213	0.063475	3.61108	0.000304928	0.00452129	ENSG00000119655	NPC2
ENSG00000165801	3128.31	0.228585	0.0550263	4.1541	3.26565e-05	0.000640078	ENSG00000165801	ARHGEF40
ENSG00000198825	1221.06	0.228366	0.0674485	3.38578	0.00070977	0.00930067	ENSG00000198825	INPP5F
ENSG00000125821	1782.41	0.227648	0.0595069	3.82557	0.000130471	0.00213592	ENSG00000125821	DTD1
ENSG00000112715	8190.28	0.226908	0.0529635	4.28424	1.83366e-05	0.00038278	ENSG00000112715	VEGFA
ENSG00000164104	1423.66	0.226778	0.0802787	2.82488	0.00472988	0.0437538	ENSG00000164104	HMGB2
ENSG00000185839	986.871	0.226668	0.0635225	3.56831	0.000359289	0.00516535	ENSG00000185839	RP4-592A1.2
ENSG00000184840	12155.4	0.225596	0.0779383	2.89455	0.00379701	0.0372623	ENSG00000184840	TMED9
ENSG00000153071	23033.9	0.225232	0.0503624	4.47223	7.74095e-06	0.000177384	ENSG00000153071	DAB2
ENSG00000070087	8081.1	0.225066	0.0529588	4.24984	2.13927e-05	0.000438465	ENSG00000070087	PFN2
ENSG00000127526	2745.83	0.224628	0.0464846	4.83231	1.34955e-06	3.66448e-05	ENSG00000127526	SLC35E1
ENSG00000228328	514.985	0.224487	0.0791028	2.83791	0.00454102	0.0425517	ENSG00000228328	RP11-516A11.1
ENSG00000091409	3797.12	0.224355	0.057716	3.88722	0.000101401	0.00170484	ENSG00000091409	ITGA6
ENSG00000171940	2615.86	0.224246	0.0618977	3.62286	0.000291369	0.00435173	ENSG00000171940	ZNF217
ENSG00000170677	2183.4	0.223473	0.0608231	3.67415	0.000238641	0.00366735	ENSG00000170677	SOCS6
ENSG00000137809	4060.22	0.223099	0.0614705	3.62937	0.000284109	0.00426447	ENSG00000137809	ITGA11
ENSG00000106367	2114.88	0.222992	0.0622978	3.57945	0.000344322	0.0049859	ENSG00000106367	AP1S1
ENSG00000170545	562.928	0.221959	0.0752199	2.95081	0.00316945	0.0322064	ENSG00000170545	SMAGP
ENSG00000231167	2149.59	0.221592	0.0480459	4.61208	3.98651e-06	9.90157e-05	ENSG00000231167	YBX1P2
ENSG00000197948	1269.39	0.22132	0.0705428	3.13739	0.00170461	0.019059	ENSG00000197948	FCHSD1
ENSG00000015475	1485.71	0.22035	0.0670172	3.28796	0.00100916	0.0124301	ENSG00000015475	BID
ENSG00000117114	1325.7	0.219993	0.0776907	2.83166	0.00463078	0.0431911	ENSG00000117114	ADGRL2
ENSG00000136826	1878.23	0.218094	0.0665064	3.2793	0.00104066	0.0127398	ENSG00000136826	KLF4
ENSG00000155090	2261.31	0.217897	0.0687476	3.16952	0.00152692	0.0174063	ENSG00000155090	KLF10
ENSG00000089280	6364.54	0.217803	0.0570306	3.81905	0.000133966	0.00218719	ENSG00000089280	FUS
ENSG00000155324	5274.59	0.217338	0.0614854	3.53479	0.000408096	0.00575253	ENSG00000155324	GRAMD3
ENSG00000219507	9549.17	0.215221	0.0697253	3.08669	0.00202396	0.0221898	ENSG00000219507	FTH1P8
ENSG00000154447	2049.96	0.214541	0.0720739	2.97667	0.00291394	0.0300325	ENSG00000154447	SH3RF1
ENSG00000169814	698.732	0.214171	0.0693063	3.0902	0.0020002	0.0219783	ENSG00000169814	BTD
ENSG00000152684	1498.82	0.213582	0.0563824	3.78809	0.000151809	0.00244971	ENSG00000152684	PELO
ENSG00000141449	545.678	0.213143	0.0728522	2.92569	0.00343689	0.0344204	ENSG00000141449	GREB1L
ENSG00000166394	788.573	0.212989	0.069623	3.05918	0.00221944	0.0239549	ENSG00000166394	CYB5R2
ENSG00000152127	3229.49	0.212767	0.0462278	4.60257	4.17304e-06	0.0001028	ENSG00000152127	MGAT5
ENSG00000182749	902.437	0.212422	0.0618236	3.43593	0.000590514	0.00793569	ENSG00000182749	PAQR7
ENSG00000104419	11771.8	0.212122	0.0440372	4.81689	1.45816e-06	3.92986e-05	ENSG00000104419	NDRG1
ENSG00000184702	892.635	0.210453	0.0753488	2.79305	0.00522133	0.0472589	ENSG00000184702	SEPT5
ENSG00000113621	4158.01	0.209054	0.0501092	4.17196	3.01985e-05	0.000597255	ENSG00000113621	TXNDC15
ENSG00000038382	11445.2	0.208556	0.043497	4.79472	1.62903e-06	4.3258e-05	ENSG00000038382	TRIO
ENSG00000113083	58310.1	0.207536	0.0719078	2.88614	0.00390003	0.0379647	ENSG00000113083	LOX
ENSG00000155660	11046.5	0.206557	0.0479547	4.30732	1.65242e-05	0.000349798	ENSG00000155660	PDIA4
ENSG00000157240	1117.64	0.205021	0.0633638	3.23561	0.00121383	0.0145057	ENSG00000157240	FZD1
ENSG00000151348	11150.1	0.204031	0.0405503	5.03154	4.8656e-07	1.45702e-05	ENSG00000151348	EXT2
ENSG00000084070	1402.06	0.203943	0.0611648	3.33432	0.000855089	0.0108658	ENSG00000084070	SMAP2
ENSG00000185088	6284.59	0.203493	0.0522865	3.89188	9.94692e-05	0.00167705	ENSG00000185088	RPS27L
ENSG00000166794	7347.75	0.203288	0.0516407	3.93659	8.2648e-05	0.00143498	ENSG00000166794	PPIB
ENSG00000101310	2090.61	0.202818	0.0589101	3.44283	0.000575657	0.00778625	ENSG00000101310	SEC23B
ENSG00000136997	3791.56	0.202409	0.0655354	3.08855	0.00201137	0.0220786	ENSG00000136997	MYC
ENSG00000128050	5353.95	0.20073	0.0660065	3.04106	0.00235747	0.0252089	ENSG00000128050	PAICS
ENSG00000100865	1000.23	0.200682	0.0662599	3.02872	0.00245595	0.0260865	ENSG00000100865	CINP
ENSG00000175183	1028.86	0.198746	0.0632304	3.14321	0.00167106	0.0187885	ENSG00000175183	CSRP2
ENSG00000212747	992.103	0.198539	0.0639437	3.1049	0.00190342	0.0209829	ENSG00000212747	FAM127C
ENSG00000169991	1296.5	0.198063	0.0630096	3.14337	0.00167013	0.0187885	ENSG00000169991	IFFO2
ENSG00000146112	4755.33	0.197796	0.059038	3.35032	0.000807176	0.010359	ENSG00000146112	PPP1R18
ENSG00000266472	1972.94	0.197118	0.0705158	2.79537	0.00518398	0.0470678	ENSG00000266472	MRPS21
ENSG00000125844	23030.6	0.196526	0.0513583	3.82657	0.000129942	0.00212919	ENSG00000125844	RRBP1
ENSG00000184867	3308.79	0.195814	0.0542265	3.61104	0.000304975	0.00452129	ENSG00000184867	ARMCX2
ENSG00000198795	1538.97	0.195767	0.0613477	3.1911	0.00141731	0.0163425	ENSG00000198795	ZNF521
ENSG00000143641	8865.17	0.194776	0.0486739	4.00164	6.29043e-05	0.00113525	ENSG00000143641	GALNT2
ENSG00000158545	1865.94	0.194497	0.0689568	2.82056	0.00479399	0.0442335	ENSG00000158545	ZC3H18
ENSG00000116791	1018.2	0.194395	0.0664942	2.92349	0.0034613	0.0346072	ENSG00000116791	CRYZ
ENSG00000169122	740.12	0.194267	0.0696199	2.7904	0.00526435	0.0475292	ENSG00000169122	FAM110B
ENSG00000163110	4788.94	0.193845	0.056333	3.44105	0.000579453	0.00783173	ENSG00000163110	PDLIM5
ENSG00000119185	2523.48	0.193058	0.0479791	4.0238	5.72669e-05	0.00104844	ENSG00000119185	ITGB1BP1
ENSG00000177469	59873.4	0.192627	0.0574229	3.35454	0.000794966	0.0102387	ENSG00000177469	PTRF
ENSG00000103512	3936.7	0.191767	0.0432138	4.43764	9.095e-06	0.000203505	ENSG00000103512	NOMO1
ENSG00000164220	2178.18	0.191053	0.0507915	3.76151	0.000168887	0.00269124	ENSG00000164220	F2RL2
ENSG00000127463	5939.81	0.190975	0.0418435	4.56403	5.01798e-06	0.000120332	ENSG00000127463	EMC1
ENSG00000176903	2242.01	0.190121	0.0536937	3.54085	0.000398841	0.00563968	ENSG00000176903	PNMA1
ENSG00000163191	20549.2	0.190006	0.0382254	4.97066	6.67255e-07	1.93087e-05	ENSG00000163191	S100A11
ENSG00000081923	7648.8	0.189789	0.0558415	3.39871	0.000677036	0.00891702	ENSG00000081923	ATP8B1
ENSG00000151474	897.71	0.189754	0.0633456	2.99554	0.00273957	0.0286608	ENSG00000151474	FRMD4A
ENSG00000230457	766.016	0.189595	0.0651027	2.91224	0.00358847	0.0356738	ENSG00000230457	PA2G4P4
ENSG00000236698	1799.5	0.189031	0.0640007	2.95358	0.00314109	0.0319542	ENSG00000236698	EIF1AXP1
ENSG00000140950	1557.46	0.188576	0.0555211	3.39647	0.000682622	0.0089775	ENSG00000140950	TLDC1
ENSG00000109861	7214.18	0.188313	0.0453095	4.15616	3.23642e-05	0.000635218	ENSG00000109861	CTSC
ENSG00000160014	10277.6	0.188034	0.0588387	3.19576	0.00139462	0.0161324	ENSG00000160014	CALM3
ENSG00000148248	18171.8	0.187606	0.0601054	3.12129	0.00180061	0.0199561	ENSG00000148248	SURF4
ENSG00000059804	5128.87	0.187459	0.0613253	3.05679	0.00223721	0.0241034	ENSG00000059804	SLC2A3
ENSG00000159399	4794.47	0.187405	0.0600405	3.12131	0.00180048	0.0199561	ENSG00000159399	HK2
ENSG00000143198	3070.72	0.187139	0.0593617	3.15253	0.00161864	0.018256	ENSG00000143198	MGST3
ENSG00000107175	2699.66	0.187093	0.0585748	3.19409	0.00140275	0.0161996	ENSG00000107175	CREB3
ENSG00000213585	8297.83	0.186435	0.0476606	3.91173	9.1636e-05	0.00156692	ENSG00000213585	VDAC1
ENSG00000173545	1539.39	0.186281	0.0538268	3.46074	0.000538688	0.0073412	ENSG00000173545	ZNF622
ENSG00000143850	2012.72	0.185664	0.0591046	3.14128	0.00168214	0.0189013	ENSG00000143850	PLEKHA6
ENSG00000002586	12852.6	0.185614	0.0527672	3.51761	0.000435455	0.00607183	ENSG00000002586	CD99
ENSG00000213719	11318.1	0.18525	0.050581	3.66245	0.000249816	0.0038067	ENSG00000213719	CLIC1
ENSG00000196935	2771.39	0.184906	0.0579726	3.18954	0.00142501	0.0164208	ENSG00000196935	SRGAP1
ENSG00000091592	1558.37	0.184171	0.0619076	2.97494	0.00293049	0.0301672	ENSG00000091592	NLRP1
ENSG00000129235	1347.81	0.183845	0.063337	2.90264	0.00370028	0.0365514	ENSG00000129235	TXNDC17
ENSG00000065923	2297.26	0.183151	0.0569122	3.21814	0.00129025	0.0152674	ENSG00000065923	SLC9A7
ENSG00000107554	2426.93	0.182273	0.0622848	2.92644	0.00342869	0.0343573	ENSG00000107554	DNMBP
ENSG00000198142	2198.74	0.182148	0.0545892	3.33671	0.000847773	0.010788	ENSG00000198142	SOWAHC
ENSG00000136811	1690.37	0.181678	0.062387	2.91211	0.00358996	0.0356738	ENSG00000136811	ODF2
ENSG00000155438	1729.64	0.180705	0.0610166	2.96157	0.00306072	0.031248	ENSG00000155438	NIFK
ENSG00000134291	1495.18	0.180658	0.065232	2.76947	0.00561477	0.0500919	ENSG00000134291	TMEM106C
ENSG00000125450	948.354	0.18007	0.0613903	2.93319	0.00335496	0.0337684	ENSG00000125450	NUP85
ENSG00000109685	3929.98	0.180011	0.048209	3.73398	0.000188476	0.00297233	ENSG00000109685	WHSC1
ENSG00000112941	1352.95	0.179029	0.0574605	3.11568	0.00183521	0.0202681	ENSG00000112941	PAPD7
ENSG00000105810	4922.01	0.179	0.0620986	2.88251	0.00394522	0.0381568	ENSG00000105810	CDK6
ENSG00000186575	2528.42	0.17893	0.0624306	2.86605	0.00415622	0.0397926	ENSG00000186575	NF2
ENSG00000130147	8839.03	0.177397	0.0589598	3.00877	0.00262305	0.02765	ENSG00000130147	SH3BP4
ENSG00000196072	1455.88	0.176864	0.0615825	2.87199	0.00407897	0.0392051	ENSG00000196072	BLOC1S2
ENSG00000153317	8619.46	0.176391	0.0632915	2.78697	0.00532039	0.0478915	ENSG00000153317	ASAP1
ENSG00000100612	1639.56	0.17504	0.0542056	3.2292	0.00124139	0.0148056	ENSG00000100612	DHRS7
ENSG00000139641	11913.9	0.173893	0.051479	3.37795	0.000730287	0.00954651	ENSG00000139641	ESYT1
ENSG00000253368	2709.67	0.173858	0.0527126	3.29822	0.000973003	0.012067	ENSG00000253368	TRNP1
ENSG00000151491	2806.03	0.173434	0.0515618	3.3636	0.000769317	0.00996525	ENSG00000151491	EPS8
ENSG00000136942	8720.36	0.173014	0.0590228	2.93131	0.00337532	0.0339166	ENSG00000136942	RPL35
ENSG00000147872	11036.7	0.171941	0.0610777	2.81512	0.00487596	0.0448295	ENSG00000147872	PLIN2
ENSG00000147535	1272.1	0.17186	0.0533906	3.21891	0.00128678	0.0152563	ENSG00000147535	PLPP5
ENSG00000185963	2372.91	0.171548	0.0534761	3.20793	0.00133695	0.015666	ENSG00000185963	BICD2
ENSG00000044574	57034.7	0.171409	0.0578389	2.96355	0.00304112	0.0310772	ENSG00000044574	HSPA5
ENSG00000224861	4538.3	0.171121	0.0474998	3.60257	0.000315093	0.00463543	ENSG00000224861	YBX1P1
ENSG00000122707	15583.7	0.170379	0.0558557	3.05034	0.00228586	0.0245689	ENSG00000122707	RECK
ENSG00000095319	2375.28	0.168658	0.0561756	3.00233	0.00267922	0.0281435	ENSG00000095319	NUP188
ENSG00000213859	1242.97	0.168297	0.0590862	2.84832	0.00439506	0.0416155	ENSG00000213859	KCTD11
ENSG00000169032	2371.3	0.16755	0.053701	3.12005	0.00180819	0.0200187	ENSG00000169032	MAP2K1
ENSG00000065978	10754	0.167361	0.037477	4.4657	7.98078e-06	0.000181041	ENSG00000065978	YBX1
ENSG00000087245	83080.2	0.167263	0.0459291	3.64175	0.000270788	0.00409516	ENSG00000087245	MMP2
ENSG00000171314	3341.26	0.167098	0.0508188	3.28812	0.00100858	0.0124301	ENSG00000171314	PGAM1
ENSG00000236603	2499.05	0.166644	0.0583792	2.8545	0.00431042	0.0409648	ENSG00000236603	RANP1
ENSG00000170113	2752.3	0.166227	0.0487135	3.41233	0.000644095	0.00857069	ENSG00000170113	NIPA1
ENSG00000122203	5578.32	0.165962	0.0456594	3.63478	0.000278221	0.00419352	ENSG00000122203	KIAA1191
ENSG00000118705	20174.8	0.16573	0.0478041	3.46686	0.00052657	0.00720324	ENSG00000118705	RPN2
ENSG00000163479	8828.85	0.163856	0.0503571	3.25389	0.00113838	0.0137129	ENSG00000163479	SSR2
ENSG00000213866	3639.56	0.163503	0.0518379	3.15412	0.00160985	0.0181795	ENSG00000213866	YBX1P10
ENSG00000146242	7143.9	0.163428	0.0468868	3.4856	0.000491041	0.00675818	ENSG00000146242	TPBG
ENSG00000137801	582957	0.16252	0.0502652	3.23324	0.00122393	0.0146167	ENSG00000137801	THBS1
ENSG00000141580	3513.82	0.162086	0.0512219	3.16439	0.00155408	0.0176379	ENSG00000141580	WDR45B
ENSG00000197956	44227.8	0.162021	0.0344034	4.70945	2.48384e-06	6.37991e-05	ENSG00000197956	S100A6
ENSG00000101150	9740.51	0.161946	0.0545506	2.96873	0.00299031	0.0305927	ENSG00000101150	TPD52L2
ENSG00000082781	7933.42	0.16174	0.0568328	2.84589	0.00442881	0.0418258	ENSG00000082781	ITGB5
ENSG00000176915	3070.1	0.161677	0.0517662	3.12322	0.00178882	0.0198787	ENSG00000176915	ANKLE2
ENSG00000232187	5823.69	0.160334	0.0434364	3.69124	0.00022316	0.00344705	ENSG00000232187	FTH1P7
ENSG00000164543	1947.04	0.15886	0.055318	2.87177	0.00408183	0.0392051	ENSG00000164543	STK17A
ENSG00000174080	3091.34	0.157551	0.0514714	3.06095	0.00220638	0.0238566	ENSG00000174080	CTSF
ENSG00000131504	3069.09	0.156884	0.0525224	2.987	0.00281733	0.0292875	ENSG00000131504	DIAPH1
ENSG00000134531	13343.7	0.155686	0.0441597	3.52553	0.000422639	0.00591414	ENSG00000134531	EMP1
ENSG00000149657	1998.3	0.155099	0.0549763	2.82119	0.0047846	0.0441695	ENSG00000149657	LSM14B
ENSG00000114867	22849.5	0.154209	0.0462208	3.33636	0.000848821	0.0107938	ENSG00000114867	EIF4G1
ENSG00000111817	4710.27	0.15419	0.045919	3.35788	0.000785434	0.0101449	ENSG00000111817	DSE
ENSG00000087460	36881.8	0.15379	0.0498837	3.08297	0.00204943	0.0224282	ENSG00000087460	GNAS
ENSG00000196154	5424.55	0.153449	0.0534543	2.87066	0.00409618	0.039322	ENSG00000196154	S100A4
ENSG00000132341	11008.6	0.150322	0.0445187	3.37661	0.00073385	0.00957452	ENSG00000132341	RAN
ENSG00000115310	30718.2	0.148254	0.0442077	3.35357	0.000797748	0.0102599	ENSG00000115310	RTN4
ENSG00000164934	2161.32	0.148084	0.049268	3.00568	0.00264991	0.0278681	ENSG00000164934	DCAF13
ENSG00000163466	16235.6	0.147785	0.0412909	3.57912	0.000344753	0.00498814	ENSG00000163466	ARPC2
ENSG00000117360	1412.8	0.145047	0.0519357	2.79282	0.00522506	0.047269	ENSG00000117360	PRPF3
ENSG00000114902	2850.81	0.143087	0.0461693	3.09917	0.00194062	0.0213539	ENSG00000114902	SPCS1
ENSG00000224411	4074.35	0.139168	0.0460989	3.01889	0.00253703	0.0268372	ENSG00000224411	HSP90AA2P
ENSG00000118263	3874.38	0.135821	0.0459064	2.95865	0.00308986	0.0315219	ENSG00000118263	KLF7
ENSG00000037474	2958.67	0.132904	0.0477585	2.78284	0.00538859	0.0483367	ENSG00000037474	NSUN2
ENSG00000164692	964422	0.130593	0.0448245	2.91344	0.00357473	0.0355837	ENSG00000164692	COL1A2
ENSG00000136478	3307.13	0.127627	0.0442764	2.88251	0.00394518	0.0381568	ENSG00000136478	TEX2
ENSG00000102007	3208.13	0.126711	0.041961	3.01973	0.00253003	0.0267946	ENSG00000102007	PLP2
ENSG00000168439	4924.84	0.123837	0.0413875	2.99213	0.00277041	0.0288996	ENSG00000168439	STIP1
ENSG00000167110	5107.66	0.119163	0.0412465	2.88904	0.00386415	0.0377043	ENSG00000167110	GOLGA2
ENSG00000231991	73650.6	0.114623	0.0396444	2.89128	0.0038368	0.0375304	ENSG00000231991	ANXA2P2
ENSG00000179218	50936.2	0.11401	0.0408666	2.7898	0.00527408	0.0475695	ENSG00000179218	CALR
ENSG00000173482	8816.17	-0.106815	0.0382143	-2.79517	0.00518719	0.0470678	ENSG00000173482	PTPRM
ENSG00000136193	12442.7	-0.107403	0.0385733	-2.78439	0.00536292	0.0481543	ENSG00000136193	SCRN1
ENSG00000160710	13217.9	-0.114112	0.0392986	-2.90372	0.00368761	0.0364661	ENSG00000160710	ADAR
ENSG00000141027	7592.86	-0.119498	0.0398232	-3.00072	0.00269343	0.0282763	ENSG00000141027	NCOR1
ENSG00000175215	15418.5	-0.121209	0.0425362	-2.84955	0.00437818	0.0415214	ENSG00000175215	CTDSP2
ENSG00000075415	18170.4	-0.121617	0.0399709	-3.04264	0.00234514	0.0251282	ENSG00000075415	SLC25A3
ENSG00000145623	14011.3	-0.122741	0.0400104	-3.06772	0.00215696	0.0234205	ENSG00000145623	OSMR
ENSG00000166340	9724.42	-0.125589	0.0410935	-3.05618	0.00224175	0.0241379	ENSG00000166340	TPP1
ENSG00000174748	21901.3	-0.126107	0.0373999	-3.37184	0.000746677	0.00969982	ENSG00000174748	RPL15
ENSG00000125354	2362.25	-0.13751	0.0486323	-2.82755	0.00469059	0.0434572	ENSG00000125354	SEPT6
ENSG00000166963	12861.6	-0.13857	0.0487151	-2.8445	0.00444815	0.0418989	ENSG00000166963	MAP1A
ENSG00000163399	10767.5	-0.139149	0.0419368	-3.31806	0.000906451	0.0113586	ENSG00000163399	ATP1A1
ENSG00000100129	7474.98	-0.139957	0.0466616	-2.9994	0.00270509	0.0283822	ENSG00000100129	EIF3L
ENSG00000141279	4116.28	-0.140083	0.0478353	-2.92846	0.0034065	0.0341645	ENSG00000141279	NPEPPS
ENSG00000092010	3760.67	-0.140957	0.049368	-2.85524	0.00430048	0.0409134	ENSG00000092010	PSME1
ENSG00000170004	9630.76	-0.14101	0.0480566	-2.93424	0.00334363	0.0336731	ENSG00000170004	CHD3
ENSG00000113048	3112.13	-0.141162	0.0496204	-2.84484	0.00444341	0.0418761	ENSG00000113048	MRPS27
ENSG00000165671	4301	-0.142092	0.049037	-2.89765	0.00375971	0.0370015	ENSG00000165671	NSD1
ENSG00000013583	1819.35	-0.145483	0.0505995	-2.8752	0.00403775	0.0389267	ENSG00000013583	HEBP1
ENSG00000134250	18929.9	-0.146098	0.0501297	-2.91441	0.00356361	0.0354926	ENSG00000134250	NOTCH2
ENSG00000165102	5637.3	-0.146673	0.051289	-2.85973	0.00424001	0.0404234	ENSG00000165102	HGSNAT
ENSG00000090857	1623.53	-0.146909	0.0504067	-2.91447	0.00356291	0.0354926	ENSG00000090857	PDPR
ENSG00000165424	5631.16	-0.14772	0.0495488	-2.98131	0.00287021	0.0297175	ENSG00000165424	ZCCHC24
ENSG00000130340	8841.93	-0.148265	0.0460283	-3.22117	0.00127669	0.0151666	ENSG00000130340	SNX9
ENSG00000106771	4282.64	-0.148618	0.0504924	-2.94337	0.00324659	0.0328608	ENSG00000106771	TMEM245
ENSG00000187079	22595.4	-0.149358	0.0446853	-3.34244	0.000830462	0.0105976	ENSG00000187079	TEAD1
ENSG00000131558	4341.95	-0.149854	0.0438898	-3.41433	0.000639401	0.00852708	ENSG00000131558	EXOC4
ENSG00000166224	3200.79	-0.150581	0.0540108	-2.78798	0.00530375	0.0477655	ENSG00000166224	SGPL1
ENSG00000183723	2231.44	-0.151332	0.0503246	-3.00712	0.00263738	0.0277525	ENSG00000183723	CMTM4
ENSG00000130741	5530.52	-0.153379	0.0522367	-2.93624	0.00332221	0.0334948	ENSG00000130741	EIF2S3
ENSG00000157540	2871.84	-0.155311	0.0474659	-3.27206	0.00106769	0.0130353	ENSG00000157540	DYRK1A
ENSG00000145495	12602.9	-0.155655	0.0454297	-3.42628	0.000611906	0.00818459	ENSG00000145495	MARCH6
ENSG00000120071	1688.14	-0.156862	0.0547612	-2.86447	0.00417705	0.0399447	ENSG00000120071	KANSL1
ENSG00000164099	11791.3	-0.157053	0.0460136	-3.41318	0.000642106	0.00855192	ENSG00000164099	PRSS12
ENSG00000071242	9049.74	-0.159176	0.0525055	-3.0316	0.00243264	0.0258846	ENSG00000071242	RPS6KA2
ENSG00000224470	2642.75	-0.16031	0.0490557	-3.26793	0.00108338	0.0132001	ENSG00000224470	ATXN1L
ENSG00000196205	162958	-0.160405	0.0576134	-2.78416	0.00536662	0.0481636	ENSG00000196205	EEF1A1P5
ENSG00000177613	1489.56	-0.16091	0.0562539	-2.86042	0.0042308	0.0403782	ENSG00000177613	CSTF2T
ENSG00000101290	2395.51	-0.160976	0.0541742	-2.97145	0.00296401	0.0304271	ENSG00000101290	CDS2
ENSG00000104611	9042.56	-0.160979	0.0407828	-3.94723	7.90621e-05	0.00137802	ENSG00000104611	SH2D4A
ENSG00000024048	2748.69	-0.161904	0.0551629	-2.93501	0.00333535	0.0336085	ENSG00000024048	UBR2
ENSG00000052841	4599.18	-0.164578	0.0549927	-2.99272	0.00276501	0.02886	ENSG00000052841	TTC17
ENSG00000183283	6569.77	-0.165067	0.0490808	-3.36317	0.000770524	0.00997372	ENSG00000183283	DAZAP2
ENSG00000025800	4912.16	-0.16535	0.0552155	-2.99462	0.00274787	0.0287142	ENSG00000025800	KPNA6
ENSG00000115183	2488.62	-0.16589	0.043881	-3.78046	0.000156539	0.00251927	ENSG00000115183	TANC1
ENSG00000139793	4107.07	-0.165908	0.05731	-2.89493	0.00379246	0.0372379	ENSG00000139793	MBNL2
ENSG00000187446	5141.4	-0.167238	0.0471514	-3.54684	0.000389886	0.00552603	ENSG00000187446	CHP1
ENSG00000076685	2165.69	-0.167944	0.0562311	-2.98668	0.00282022	0.0293007	ENSG00000076685	NT5C2
ENSG00000005073	1755.76	-0.16823	0.0583289	-2.88416	0.00392461	0.0380707	ENSG00000005073	HOXA11
ENSG00000170145	2519.49	-0.168497	0.0502659	-3.35211	0.000801984	0.0103071	ENSG00000170145	SIK2
ENSG00000123066	5450.58	-0.168856	0.0410095	-4.11749	3.83024e-05	0.000739708	ENSG00000123066	MED13L
ENSG00000140262	5258.63	-0.169088	0.053153	-3.18116	0.00146685	0.0168492	ENSG00000140262	TCF12
ENSG00000179981	6393.25	-0.169247	0.0577141	-2.93251	0.0033623	0.0338046	ENSG00000179981	TSHZ1
ENSG00000135148	1635.58	-0.169324	0.053566	-3.16105	0.00157204	0.0178082	ENSG00000135148	TRAFD1
ENSG00000056586	4295.7	-0.169753	0.0608192	-2.79111	0.00525272	0.0474479	ENSG00000056586	RC3H2
ENSG00000196850	1101.59	-0.171563	0.060949	-2.81485	0.00487994	0.0448433	ENSG00000196850	PPTC7
ENSG00000140945	7894.93	-0.171724	0.0589507	-2.913	0.00357973	0.0356139	ENSG00000140945	CDH13
ENSG00000116478	4141.74	-0.171919	0.055029	-3.12415	0.00178319	0.0198392	ENSG00000116478	HDAC1
ENSG00000143437	3386.59	-0.171936	0.0603708	-2.84799	0.00439962	0.0416155	ENSG00000143437	ARNT
ENSG00000119912	2586.47	-0.172621	0.0523686	-3.29628	0.00097975	0.0121423	ENSG00000119912	IDE
ENSG00000173548	3417.22	-0.172844	0.0514655	-3.35845	0.000783815	0.0101312	ENSG00000173548	SNX33
ENSG00000156709	1232.36	-0.173754	0.0613484	-2.83225	0.00462214	0.0431328	ENSG00000156709	AIFM1
ENSG00000134313	5794.92	-0.174187	0.0483869	-3.59988	0.000318362	0.00467372	ENSG00000134313	KIDINS220
ENSG00000128534	970.996	-0.174583	0.059573	-2.93057	0.00338336	0.0339596	ENSG00000128534	LSM8
ENSG00000115993	5388.56	-0.174681	0.0574136	-3.0425	0.00234625	0.0251282	ENSG00000115993	TRAK2
ENSG00000142541	9291.47	-0.175066	0.0579845	-3.01919	0.00253451	0.0268262	ENSG00000142541	RPL13A
ENSG00000133657	20642.8	-0.17577	0.0534484	-3.28859	0.00100689	0.0124258	ENSG00000133657	ATP13A3
ENSG00000112679	1000.66	-0.176023	0.0591717	-2.97478	0.00293202	0.0301672	ENSG00000112679	DUSP22
ENSG00000089289	2206.17	-0.176174	0.0609655	-2.88974	0.00385565	0.037674	ENSG00000089289	IGBP1
ENSG00000159873	1768.34	-0.1764	0.0631806	-2.792	0.00523839	0.0473659	ENSG00000159873	CCDC117
ENSG00000144724	5597.16	-0.176678	0.0496867	-3.55584	0.000376768	0.00537257	ENSG00000144724	PTPRG
ENSG00000119638	5618.51	-0.179053	0.0461345	-3.88111	0.000103981	0.00174173	ENSG00000119638	NEK9
ENSG00000120733	3281.86	-0.179382	0.0519683	-3.45176	0.000556949	0.00757292	ENSG00000120733	KDM3B
ENSG00000155463	3410.17	-0.179469	0.0569924	-3.14899	0.00163836	0.0184553	ENSG00000155463	OXA1L
ENSG00000140105	16225.4	-0.179911	0.0517744	-3.47491	0.000511027	0.00700654	ENSG00000140105	WARS
ENSG00000204516	758.743	-0.180048	0.0629893	-2.85839	0.00425792	0.0405513	ENSG00000204516	MICB
ENSG00000197555	3706.31	-0.180308	0.0475744	-3.79001	0.000150639	0.00243299	ENSG00000197555	SIPA1L1
ENSG00000118762	8830.17	-0.182278	0.0644304	-2.82906	0.00466848	0.0434128	ENSG00000118762	PKD2
ENSG00000075711	5945.34	-0.182659	0.0540518	-3.37934	0.00072661	0.00950754	ENSG00000075711	DLG1
ENSG00000141084	1206.04	-0.183851	0.0603638	-3.04571	0.0023213	0.024935	ENSG00000141084	RANBP10
ENSG00000124177	3413.47	-0.183891	0.0535211	-3.43587	0.000590661	0.00793569	ENSG00000124177	CHD6
ENSG00000130939	3691.2	-0.184102	0.0474901	-3.87664	0.00010591	0.0017659	ENSG00000130939	UBE4B
ENSG00000082512	2280.06	-0.1842	0.0623872	-2.95253	0.00315186	0.0320457	ENSG00000082512	TRAF5
ENSG00000116774	7631.62	-0.184322	0.0515169	-3.57789	0.000346373	0.00500357	ENSG00000116774	OLFML3
ENSG00000106415	822.528	-0.185229	0.066288	-2.7943	0.00520119	0.0471239	ENSG00000106415	GLCCI1
ENSG00000108510	4560.13	-0.185246	0.066152	-2.80031	0.00510541	0.0465363	ENSG00000108510	MED13
ENSG00000140092	19772	-0.187688	0.0558677	-3.35952	0.000780786	0.0100993	ENSG00000140092	FBLN5
ENSG00000186260	1005.11	-0.188009	0.0653876	-2.87531	0.00403631	0.0389267	ENSG00000186260	MKL2
ENSG00000168610	10412.4	-0.188019	0.0420746	-4.4687	7.86951e-06	0.000179646	ENSG00000168610	STAT3
ENSG00000181754	997.146	-0.188558	0.0662997	-2.84402	0.00445478	0.0419395	ENSG00000181754	AMIGO1
ENSG00000149485	6687.34	-0.190116	0.0579265	-3.28203	0.00103064	0.0126428	ENSG00000149485	FADS1
ENSG00000156026	2047.44	-0.190358	0.0655916	-2.90218	0.00370577	0.0365805	ENSG00000156026	MCU
ENSG00000115295	4523.71	-0.191258	0.0678443	-2.81907	0.00481628	0.0443712	ENSG00000115295	CLIP4
ENSG00000120690	4465.43	-0.192565	0.0646517	-2.97849	0.00289668	0.0299401	ENSG00000120690	ELF1
ENSG00000225972	2399.67	-0.192826	0.0675392	-2.85502	0.00430339	0.0409196	ENSG00000225972	MTND1P23
ENSG00000106617	1232.83	-0.193472	0.0569049	-3.39991	0.000674081	0.00889108	ENSG00000106617	PRKAG2
ENSG00000147852	4924.73	-0.193848	0.0498808	-3.88622	0.000101816	0.00171023	ENSG00000147852	VLDLR
ENSG00000213853	2125.67	-0.194144	0.0584123	-3.32367	0.000888399	0.0112102	ENSG00000213853	EMP2
ENSG00000242498	1446.38	-0.19502	0.0695097	-2.80565	0.00502158	0.0458185	ENSG00000242498	ARPIN
ENSG00000164983	2236.05	-0.195056	0.0679162	-2.87201	0.00407866	0.0392051	ENSG00000164983	TMEM65
ENSG00000102804	4253.71	-0.195646	0.0534172	-3.66261	0.00024966	0.0038067	ENSG00000102804	TSC22D1
ENSG00000147251	3274.76	-0.196079	0.0654732	-2.9948	0.00274623	0.0287138	ENSG00000147251	DOCK11
ENSG00000106086	1624.15	-0.1963	0.0595918	-3.29408	0.000987461	0.0122295	ENSG00000106086	PLEKHA8
ENSG00000168014	3347.56	-0.196364	0.0685889	-2.86291	0.00419771	0.0400866	ENSG00000168014	C2CD3
ENSG00000177425	3665.9	-0.19664	0.0603448	-3.25861	0.00111961	0.0135139	ENSG00000177425	PAWR
ENSG00000188921	1293.59	-0.197124	0.06635	-2.97098	0.00296851	0.0304468	ENSG00000188921	HACD4
ENSG00000179152	1259.42	-0.197357	0.0702931	-2.80762	0.00499084	0.0456302	ENSG00000179152	TCAIM
ENSG00000118816	11719.2	-0.197494	0.069956	-2.82312	0.00475592	0.0439497	ENSG00000118816	CCNI
ENSG00000255399	3356.79	-0.197947	0.0607077	-3.26066	0.00111153	0.0134661	ENSG00000255399	TBX5-AS1
ENSG00000006607	3001.75	-0.198438	0.0569058	-3.48713	0.000488241	0.00672477	ENSG00000006607	FARP2
ENSG00000102606	3789.05	-0.199662	0.0532681	-3.74825	0.000178074	0.00282447	ENSG00000102606	ARHGEF7
ENSG00000162849	3630.3	-0.199825	0.059158	-3.37781	0.000730646	0.00954651	ENSG00000162849	KIF26B
ENSG00000099250	10855.6	-0.200328	0.0650115	-3.08142	0.00206016	0.0225042	ENSG00000099250	NRP1
ENSG00000099968	3409.74	-0.200877	0.0528674	-3.79963	0.000144911	0.002351	ENSG00000099968	BCL2L13
ENSG00000213064	2909.73	-0.20122	0.0674062	-2.98518	0.00283409	0.0294016	ENSG00000213064	SFT2D2
ENSG00000171533	1297.84	-0.202117	0.0667765	-3.02677	0.00247186	0.02624	ENSG00000171533	MAP6
ENSG00000137992	1457.58	-0.202273	0.072319	-2.79696	0.00515857	0.0469261	ENSG00000137992	DBT
ENSG00000117543	1048.97	-0.202515	0.0574055	-3.5278	0.00041903	0.00587911	ENSG00000117543	DPH5
ENSG00000163788	1592.17	-0.20306	0.0638917	-3.17819	0.00148196	0.0169903	ENSG00000163788	SNRK
ENSG00000139436	1766.7	-0.203793	0.056967	-3.57739	0.000347041	0.00500921	ENSG00000139436	GIT2
ENSG00000133687	6992.55	-0.203908	0.0476567	-4.27869	1.87994e-05	0.000391083	ENSG00000133687	TMTC1
ENSG00000076513	11716.6	-0.204064	0.0520512	-3.92044	8.83881e-05	0.00152002	ENSG00000076513	ANKRD13A
ENSG00000225031	2075.29	-0.204571	0.0597158	-3.42575	0.000613098	0.00819446	ENSG00000225031	EIF4BP7
ENSG00000119402	5500.92	-0.204803	0.0561928	-3.64464	0.000267761	0.00405278	ENSG00000119402	FBXW2
ENSG00000205765	3257.37	-0.204926	0.0582697	-3.51686	0.000436683	0.00608425	ENSG00000205765	C5orf51
ENSG00000176542	943.749	-0.205117	0.0638666	-3.21165	0.00131975	0.0155047	ENSG00000176542	USF3
ENSG00000066739	2250.64	-0.205521	0.0599239	-3.42971	0.000604236	0.00809398	ENSG00000066739	ATG2B
ENSG00000180574	2792.5	-0.206786	0.0701783	-2.94658	0.00321305	0.032559	ENSG00000180574	EIF2S3L
ENSG00000168679	1406.54	-0.207105	0.0608691	-3.40246	0.000667825	0.00884085	ENSG00000168679	SLC16A4
ENSG00000172915	2839.54	-0.207579	0.0516455	-4.0193	5.83708e-05	0.00106465	ENSG00000172915	NBEA
ENSG00000164576	2429.94	-0.208379	0.0529842	-3.93285	8.3944e-05	0.00145537	ENSG00000164576	SAP30L
ENSG00000083223	3736.12	-0.208397	0.0649772	-3.20723	0.00134019	0.0156938	ENSG00000083223	ZCCHC6
ENSG00000010270	1676.04	-0.208578	0.0678041	-3.07618	0.00209673	0.0228489	ENSG00000010270	STARD3NL
ENSG00000138032	1758.03	-0.208759	0.0561455	-3.71817	0.000200672	0.00313594	ENSG00000138032	PPM1B
ENSG00000137203	2493.32	-0.209123	0.0606695	-3.44692	0.00056702	0.0076867	ENSG00000137203	TFAP2A
ENSG00000111913	2660.55	-0.209209	0.0693937	-3.01481	0.00257142	0.0271851	ENSG00000111913	FAM65B
ENSG00000139625	1339.45	-0.209385	0.0744482	-2.81249	0.0049159	0.045055	ENSG00000139625	MAP3K12
ENSG00000143106	5303.34	-0.209637	0.0523895	-4.0015	6.29416e-05	0.00113525	ENSG00000143106	PSMA5
ENSG00000091136	30164.3	-0.209788	0.0455469	-4.60598	4.10537e-06	0.00010141	ENSG00000091136	LAMB1
ENSG00000112186	2189.79	-0.209826	0.0634753	-3.30563	0.000947636	0.0117929	ENSG00000112186	CAP2
ENSG00000115020	2646.91	-0.210936	0.059699	-3.53332	0.000410369	0.00577555	ENSG00000115020	PIKFYVE
ENSG00000156508	68370.3	-0.211025	0.0413583	-5.10236	3.3544e-07	1.03011e-05	ENSG00000156508	EEF1A1
ENSG00000173821	6358.12	-0.211117	0.0731921	-2.88442	0.00392131	0.0380683	ENSG00000173821	RNF213
ENSG00000124151	3416.4	-0.211631	0.0526112	-4.02255	5.75706e-05	0.00105218	ENSG00000124151	NCOA3
ENSG00000064763	945.48	-0.211847	0.0762584	-2.77801	0.00546927	0.0489631	ENSG00000064763	FAR2
ENSG00000101224	3273.81	-0.212301	0.0749113	-2.83403	0.00459648	0.0429634	ENSG00000101224	CDC25B
ENSG00000104517	6907.7	-0.212868	0.0572548	-3.7179	0.000200882	0.00313594	ENSG00000104517	UBR5
ENSG00000185880	917.283	-0.213001	0.0715335	-2.97763	0.00290483	0.029974	ENSG00000185880	TRIM69
ENSG00000224546	1912.13	-0.213141	0.0596223	-3.57485	0.000350426	0.00505402	ENSG00000224546	EIF4BP3
ENSG00000104341	4087.03	-0.213451	0.0628915	-3.39395	0.000688916	0.00905368	ENSG00000104341	LAPTM4B
ENSG00000150347	14934.8	-0.215066	0.0570306	-3.77106	0.000162556	0.00260219	ENSG00000150347	ARID5B
ENSG00000115904	3686.76	-0.215075	0.0736882	-2.91871	0.00351477	0.0351225	ENSG00000115904	SOS1
ENSG00000088367	2449.27	-0.215804	0.064149	-3.36411	0.000767922	0.00995432	ENSG00000088367	EPB41L1
ENSG00000072952	5683.06	-0.216489	0.0518405	-4.17606	2.96599e-05	0.000588536	ENSG00000072952	MRVI1
ENSG00000163453	9181.86	-0.21655	0.0496443	-4.36204	1.28856e-05	0.000279657	ENSG00000163453	IGFBP7
ENSG00000077044	1371.11	-0.216577	0.0682215	-3.17461	0.00150036	0.017136	ENSG00000077044	DGKD
ENSG00000085185	1010.54	-0.216656	0.077037	-2.81236	0.00491795	0.045055	ENSG00000085185	BCORL1
ENSG00000078269	2503.1	-0.217503	0.0694742	-3.1307	0.00174388	0.0194498	ENSG00000078269	SYNJ2
ENSG00000143013	2648.03	-0.21829	0.0623522	-3.50091	0.000463664	0.00642053	ENSG00000143013	LMO4
ENSG00000110756	2233.7	-0.218301	0.0521768	-4.18386	2.86595e-05	0.000571828	ENSG00000110756	HPS5
ENSG00000102763	1822.73	-0.21972	0.0578545	-3.79781	0.000145981	0.00236198	ENSG00000102763	VWA8
ENSG00000164168	3394.14	-0.220059	0.0523488	-4.20371	2.62577e-05	0.000527991	ENSG00000164168	TMEM184C
ENSG00000081377	1446.93	-0.220165	0.0608348	-3.61906	0.000295673	0.00440872	ENSG00000081377	CDC14B
ENSG00000145675	2712.68	-0.220202	0.0611236	-3.60257	0.000315091	0.00463543	ENSG00000145675	PIK3R1
ENSG00000175274	12090.2	-0.221133	0.0751652	-2.94195	0.00326149	0.0329746	ENSG00000175274	TP53I11
ENSG00000141198	959.378	-0.221269	0.0655735	-3.37437	0.000739857	0.00963202	ENSG00000141198	TOM1L1
ENSG00000011523	1342.77	-0.221286	0.0641722	-3.44831	0.000564102	0.00765289	ENSG00000011523	CEP68
ENSG00000166033	14202.5	-0.221921	0.0461158	-4.81227	1.49226e-06	4.00978e-05	ENSG00000166033	HTRA1
ENSG00000114770	1114.08	-0.221961	0.0625548	-3.54827	0.000387775	0.00550043	ENSG00000114770	ABCC5
ENSG00000153246	2051.21	-0.222364	0.0766906	-2.8995	0.00373762	0.0368196	ENSG00000153246	PLA2R1
ENSG00000129003	3486.59	-0.222472	0.0725138	-3.06799	0.00215504	0.0234137	ENSG00000129003	VPS13C
ENSG00000113721	23103.4	-0.222651	0.0694297	-3.20685	0.00134196	0.0157043	ENSG00000113721	PDGFRB
ENSG00000112290	1979.3	-0.222802	0.0551498	-4.03994	5.34653e-05	0.000989163	ENSG00000112290	WASF1
ENSG00000122970	1149.54	-0.222958	0.0787124	-2.83257	0.00461757	0.0431125	ENSG00000122970	IFT81
ENSG00000154305	6501.6	-0.22322	0.0773652	-2.88528	0.00391065	0.0380454	ENSG00000154305	MIA3
ENSG00000125868	29346.1	-0.223579	0.0588613	-3.7984	0.000145634	0.00235848	ENSG00000125868	DSTN
ENSG00000174738	2764	-0.223606	0.0781865	-2.85991	0.00423762	0.040422	ENSG00000174738	NR1D2
ENSG00000146414	760.857	-0.22367	0.0708185	-3.15836	0.00158658	0.0179583	ENSG00000146414	SHPRH
ENSG00000179456	710.419	-0.224102	0.0731698	-3.06277	0.00219299	0.0237404	ENSG00000179456	ZBTB18
ENSG00000122335	1004.68	-0.224256	0.072766	-3.08187	0.00205701	0.0224866	ENSG00000122335	SERAC1
ENSG00000211584	990.911	-0.224278	0.0650289	-3.4489	0.000562884	0.00764259	ENSG00000211584	SLC48A1
ENSG00000069974	721.13	-0.224928	0.0773405	-2.90828	0.00363418	0.0360364	ENSG00000069974	RAB27A
ENSG00000246273	2493.55	-0.224965	0.0674074	-3.33739	0.000845689	0.0107691	ENSG00000246273	SBF2-AS1
ENSG00000136144	1273.83	-0.225413	0.0672005	-3.35433	0.000795565	0.0102391	ENSG00000136144	RCBTB1
ENSG00000109790	7813.45	-0.226018	0.0635687	-3.5555	0.000377267	0.00537257	ENSG00000109790	KLHL5
ENSG00000204267	761.397	-0.226642	0.0628795	-3.60438	0.000312901	0.00461984	ENSG00000204267	TAP2
ENSG00000164237	2353.25	-0.226667	0.0659561	-3.43664	0.000588985	0.00792746	ENSG00000164237	CMBL
ENSG00000154767	2285.24	-0.227085	0.0621978	-3.65102	0.000261204	0.00396349	ENSG00000154767	XPC
ENSG00000214717	2679.72	-0.227218	0.0807408	-2.81416	0.00489051	0.0448948	ENSG00000214717	ZBED1
ENSG00000206527	5031.01	-0.227246	0.0650911	-3.49119	0.00048087	0.00663843	ENSG00000206527	HACD2
ENSG00000128923	2775.13	-0.227263	0.0785432	-2.89348	0.00381001	0.0373493	ENSG00000128923	FAM63B
ENSG00000101417	388.509	-0.227281	0.0800335	-2.83982	0.0045139	0.0423856	ENSG00000101417	PXMP4
ENSG00000112246	7521.96	-0.227295	0.0815047	-2.78874	0.0052914	0.0477018	ENSG00000112246	SIM1
ENSG00000130024	3084.87	-0.227672	0.0799808	-2.84659	0.00441905	0.0417555	ENSG00000130024	PHF10
ENSG00000254087	1716.01	-0.228155	0.0552608	-4.12869	3.64837e-05	0.000709135	ENSG00000254087	LYN
ENSG00000150764	1893.71	-0.228551	0.0695992	-3.28382	0.00102411	0.0125798	ENSG00000150764	DIXDC1
ENSG00000270504	728.477	-0.228868	0.0734295	-3.11684	0.00182799	0.0202007	ENSG00000270504	RP11-420L9.5
ENSG00000152377	22926.7	-0.228926	0.0793654	-2.88446	0.00392088	0.0380683	ENSG00000152377	SPOCK1
ENSG00000105835	2617.32	-0.229132	0.0819093	-2.79738	0.00515187	0.0469124	ENSG00000105835	NAMPT
ENSG00000153179	2567	-0.229652	0.0654507	-3.50878	0.000450168	0.00624803	ENSG00000153179	RASSF3
ENSG00000187605	1251.61	-0.229743	0.0770943	-2.98003	0.00288222	0.0298077	ENSG00000187605	TET3
ENSG00000166387	1420.16	-0.229756	0.078224	-2.93716	0.00331237	0.0334329	ENSG00000166387	PPFIBP2
ENSG00000118961	940.61	-0.229875	0.0727857	-3.15824	0.00158727	0.0179583	ENSG00000118961	LDAH
ENSG00000011258	897.408	-0.230693	0.0772598	-2.98593	0.00282714	0.0293557	ENSG00000011258	MBTD1
ENSG00000108306	1150.4	-0.23134	0.0632445	-3.65787	0.00025432	0.00386553	ENSG00000108306	FBXL20
ENSG00000123080	1000.5	-0.23182	0.0790456	-2.93273	0.00335996	0.0337999	ENSG00000123080	CDKN2C
ENSG00000162545	7563.53	-0.232053	0.0547532	-4.23817	2.25347e-05	0.000460304	ENSG00000162545	CAMK2N1
ENSG00000163412	1030.31	-0.232784	0.0823033	-2.82837	0.00467859	0.0434128	ENSG00000163412	EIF4E3
ENSG00000157600	937.134	-0.232862	0.0723164	-3.22004	0.00128173	0.0152064	ENSG00000157600	TMEM164
ENSG00000227051	4844	-0.233067	0.0701572	-3.32206	0.000893542	0.0112461	ENSG00000227051	C14orf132
ENSG00000179604	2302.96	-0.233168	0.0616135	-3.78437	0.000154097	0.0024844	ENSG00000179604	CDC42EP4
ENSG00000126561	702.604	-0.23348	0.076363	-3.0575	0.00223188	0.0240604	ENSG00000126561	STAT5A
ENSG00000145476	827.425	-0.233653	0.0824079	-2.83532	0.00457792	0.0428308	ENSG00000145476	CYP4V2
ENSG00000125703	451.558	-0.234301	0.0809257	-2.89526	0.00378839	0.0372182	ENSG00000125703	ATG4C
ENSG00000082213	1607.62	-0.234317	0.0693208	-3.38018	0.000724376	0.00948517	ENSG00000082213	C5orf22
ENSG00000106571	1958.12	-0.234661	0.0668537	-3.51007	0.000447985	0.00622251	ENSG00000106571	GLI3
ENSG00000102554	1486.28	-0.234735	0.082706	-2.83818	0.00453713	0.0425517	ENSG00000102554	KLF5
ENSG00000073849	587.953	-0.236345	0.0834264	-2.83298	0.0046117	0.0430799	ENSG00000073849	ST6GAL1
ENSG00000112419	2450.79	-0.236453	0.066308	-3.56598	0.0003625	0.00520324	ENSG00000112419	PHACTR2
ENSG00000084676	2041.47	-0.238304	0.0598689	-3.98044	6.87887e-05	0.00121951	ENSG00000084676	NCOA1
ENSG00000136104	655.919	-0.23834	0.0800379	-2.97785	0.00290282	0.029974	ENSG00000136104	RNASEH2B
ENSG00000079102	1687.94	-0.238477	0.0753496	-3.16493	0.00155118	0.0176295	ENSG00000079102	RUNX1T1
ENSG00000063046	14469.3	-0.239576	0.0660071	-3.62955	0.000283916	0.00426447	ENSG00000063046	EIF4B
ENSG00000070018	3349.57	-0.239685	0.07361	-3.25614	0.00112937	0.0136226	ENSG00000070018	LRP6
ENSG00000197258	2676.46	-0.24071	0.057109	-4.21493	2.49858e-05	0.000505228	ENSG00000197258	EIF4BP6
ENSG00000154310	587.262	-0.241041	0.0841952	-2.86289	0.00419802	0.0400866	ENSG00000154310	TNIK
ENSG00000143162	4192.07	-0.241278	0.0768963	-3.13771	0.00170272	0.0190496	ENSG00000143162	CREG1
ENSG00000166780	606.376	-0.242128	0.0742832	-3.25953	0.00111597	0.013479	ENSG00000166780	C16orf45
ENSG00000172728	610.662	-0.2423	0.0740574	-3.27178	0.00106872	0.0130391	ENSG00000172728	FUT10
ENSG00000176273	580.14	-0.243407	0.0861389	-2.82575	0.00471707	0.0436621	ENSG00000176273	SLC35G1
ENSG00000140526	3144.88	-0.244782	0.0567069	-4.31662	1.58436e-05	0.000335784	ENSG00000140526	ABHD2
ENSG00000162407	3234.36	-0.244934	0.0784756	-3.12116	0.00180143	0.0199561	ENSG00000162407	PLPP3
ENSG00000107738	8483.35	-0.244961	0.0868632	-2.82008	0.00480124	0.0442552	ENSG00000107738	C10orf54
ENSG00000177042	475.729	-0.246207	0.0840767	-2.92836	0.00340756	0.0341645	ENSG00000177042	TMEM80
ENSG00000144283	4980.92	-0.246476	0.0497723	-4.95208	7.34247e-07	2.10116e-05	ENSG00000144283	PKP4
ENSG00000021826	972.959	-0.246648	0.069583	-3.54466	0.000393117	0.00556747	ENSG00000021826	CPS1
ENSG00000112079	5256.37	-0.248139	0.0643044	-3.85881	0.00011394	0.00188927	ENSG00000112079	STK38
ENSG00000236439	2290.17	-0.248208	0.0864919	-2.86973	0.00410821	0.0394166	ENSG00000236439	RP11-175B9.3
ENSG00000091986	117613	-0.248592	0.0691138	-3.59686	0.000322086	0.00471305	ENSG00000091986	CCDC80
ENSG00000156466	3127.91	-0.249456	0.054572	-4.57114	4.85078e-06	0.000117256	ENSG00000156466	GDF6
ENSG00000047346	1259.87	-0.249595	0.0733699	-3.40188	0.000669249	0.0088532	ENSG00000047346	FAM214A
ENSG00000159023	1976.85	-0.24975	0.0747288	-3.34209	0.000831501	0.0106034	ENSG00000159023	EPB41
ENSG00000137752	423.043	-0.249945	0.0898339	-2.7823	0.00539754	0.0483842	ENSG00000137752	CASP1
ENSG00000196781	931.906	-0.250267	0.0721789	-3.46732	0.000525684	0.00719657	ENSG00000196781	TLE1
ENSG00000145604	2739.5	-0.25033	0.0511917	-4.89004	1.00816e-06	2.83115e-05	ENSG00000145604	SKP2
ENSG00000111276	2215.2	-0.250937	0.046733	-5.36958	7.89194e-08	2.77247e-06	ENSG00000111276	CDKN1B
ENSG00000047634	966.723	-0.250984	0.0696959	-3.60113	0.000316835	0.00465508	ENSG00000047634	SCML1
ENSG00000163558	2777.53	-0.251254	0.0786714	-3.19371	0.00140456	0.0162059	ENSG00000163558	PRKCI
ENSG00000170006	338.61	-0.251428	0.0823667	-3.05254	0.0022691	0.0244179	ENSG00000170006	TMEM154
ENSG00000066084	3145.32	-0.251834	0.0626934	-4.01692	5.8964e-05	0.00107114	ENSG00000066084	DIP2B
ENSG00000033327	1585.18	-0.252136	0.0634914	-3.97119	7.15159e-05	0.0012611	ENSG00000033327	GAB2
ENSG00000135821	6347.34	-0.252159	0.0520938	-4.84047	1.29531e-06	3.54385e-05	ENSG00000135821	GLUL
ENSG00000062725	2846.22	-0.252305	0.0699284	-3.60805	0.000308502	0.00456259	ENSG00000062725	APPBP2
ENSG00000073146	308.02	-0.252748	0.0895259	-2.82319	0.0047549	0.0439497	ENSG00000073146	MOV10L1
ENSG00000109099	6493.62	-0.253271	0.0720925	-3.51314	0.000442839	0.00616527	ENSG00000109099	PMP22
ENSG00000253293	1174.39	-0.253502	0.0683364	-3.70961	0.000207575	0.0032312	ENSG00000253293	HOXA10
ENSG00000140391	8529.89	-0.253672	0.0423461	-5.99045	2.09263e-09	1.00496e-07	ENSG00000140391	TSPAN3
ENSG00000178764	1141.54	-0.253726	0.0595611	-4.25994	2.04485e-05	0.000421025	ENSG00000178764	ZHX2
ENSG00000181192	739.449	-0.254644	0.0728445	-3.49572	0.000472786	0.00654183	ENSG00000181192	DHTKD1
ENSG00000129675	751.226	-0.25468	0.0814741	-3.1259	0.00177261	0.0197337	ENSG00000129675	ARHGEF6
ENSG00000140937	21396.6	-0.254878	0.0422423	-6.0337	1.60245e-09	7.79929e-08	ENSG00000140937	CDH11
ENSG00000064933	1280.42	-0.255617	0.0772789	-3.30772	0.000940587	0.0117132	ENSG00000064933	PMS1
ENSG00000065534	38949.1	-0.256431	0.0488064	-5.25404	1.48798e-07	4.93904e-06	ENSG00000065534	MYLK
ENSG00000132970	1733.65	-0.258132	0.0573048	-4.50455	6.65141e-06	0.000154774	ENSG00000132970	WASF3
ENSG00000225484	717.834	-0.258183	0.0840157	-3.07303	0.002119	0.0230498	ENSG00000225484	NUTM2B-AS1
ENSG00000146729	2647.98	-0.258779	0.0647299	-3.99783	6.39256e-05	0.00114856	ENSG00000146729	GBAS
ENSG00000109436	2094.23	-0.259019	0.0499161	-5.18908	2.1133e-07	6.76594e-06	ENSG00000109436	TBC1D9
ENSG00000153721	850.649	-0.259479	0.0761864	-3.40584	0.00065961	0.00876376	ENSG00000153721	CNKSR3
ENSG00000197461	1057.87	-0.25953	0.0644175	-4.02887	5.60445e-05	0.0010295	ENSG00000197461	PDGFA
ENSG00000071967	25600.1	-0.259803	0.0775593	-3.34974	0.000808881	0.0103736	ENSG00000071967	CYBRD1
ENSG00000140577	2853.1	-0.260346	0.0571845	-4.55274	5.2952e-06	0.000126142	ENSG00000140577	CRTC3
ENSG00000165169	1778.13	-0.260673	0.0803064	-3.24598	0.00117047	0.0140632	ENSG00000165169	DYNLT3
ENSG00000114423	1380.96	-0.260823	0.0807864	-3.22855	0.00124418	0.0148291	ENSG00000114423	CBLB
ENSG00000166938	1082.91	-0.260935	0.0591035	-4.41488	1.01068e-05	0.000223651	ENSG00000166938	DIS3L
ENSG00000170365	455.783	-0.261115	0.0800912	-3.26021	0.00111328	0.0134661	ENSG00000170365	SMAD1
ENSG00000124508	449.368	-0.261732	0.0873472	-2.99645	0.00273139	0.0285917	ENSG00000124508	BTN2A2
ENSG00000123096	936.507	-0.261758	0.0823665	-3.17796	0.00148315	0.0169932	ENSG00000123096	SSPN
ENSG00000229419	647.484	-0.262515	0.0927977	-2.82889	0.00467094	0.0434128	ENSG00000229419	RALGAPA1P1
ENSG00000001084	693.004	-0.262575	0.0765587	-3.42972	0.000604213	0.00809398	ENSG00000001084	GCLC
ENSG00000151388	7798.05	-0.262859	0.045607	-5.76357	8.23551e-09	3.49903e-07	ENSG00000151388	ADAMTS12
ENSG00000139178	3045.11	-0.263564	0.0489527	-5.38406	7.28253e-08	2.5886e-06	ENSG00000139178	C1RL
ENSG00000240694	2037.17	-0.263765	0.0675965	-3.90205	9.53827e-05	0.0016167	ENSG00000240694	PNMA2
ENSG00000178033	1307.47	-0.264007	0.0653896	-4.03745	5.40359e-05	0.000998164	ENSG00000178033	FAM26E
ENSG00000144681	2956.71	-0.264399	0.0481717	-5.48868	4.04947e-08	1.51077e-06	ENSG00000144681	STAC
ENSG00000097096	373.386	-0.265296	0.0943251	-2.81257	0.00491473	0.045055	ENSG00000097096	SYDE2
ENSG00000119280	15089	-0.265346	0.0772129	-3.43655	0.00058917	0.00792746	ENSG00000119280	C1orf198
ENSG00000138756	1350.08	-0.265553	0.0703286	-3.77589	0.000159437	0.0025568	ENSG00000138756	BMP2K
ENSG00000277998	1882.61	-0.265667	0.0920272	-2.88683	0.00389143	0.0379414	ENSG00000277998	RP11-452N17.1
ENSG00000164938	1919.89	-0.265948	0.0890917	-2.98511	0.00283481	0.0294016	ENSG00000164938	TP53INP1
ENSG00000132849	726.213	-0.266101	0.0637536	-4.1739	2.99429e-05	0.000592849	ENSG00000132849	PATJ
ENSG00000187098	1494.64	-0.266178	0.061197	-4.34952	1.36437e-05	0.000294342	ENSG00000187098	MITF
ENSG00000165675	677.395	-0.266612	0.081614	-3.26674	0.00108794	0.0132468	ENSG00000165675	ENOX2
ENSG00000149289	569.552	-0.267309	0.0716406	-3.73125	0.000190531	0.00299167	ENSG00000149289	ZC3H12C
ENSG00000175130	2337.11	-0.26736	0.0796992	-3.35461	0.00079477	0.0102387	ENSG00000175130	MARCKSL1
ENSG00000166912	2232.61	-0.267494	0.0498041	-5.37093	7.83327e-08	2.7626e-06	ENSG00000166912	MTMR10
ENSG00000141068	864.624	-0.267832	0.0800734	-3.34483	0.000823331	0.0105215	ENSG00000141068	KSR1
ENSG00000145362	1281.41	-0.26863	0.0767295	-3.501	0.000463511	0.00642053	ENSG00000145362	ANK2
ENSG00000163050	443.676	-0.268895	0.0943983	-2.84851	0.00439243	0.0416155	ENSG00000163050	COQ8A
ENSG00000123636	1219.11	-0.269092	0.0659754	-4.07867	4.5295e-05	0.000858229	ENSG00000123636	BAZ2B
ENSG00000029993	2300.11	-0.269235	0.0749361	-3.59286	0.000327069	0.0047705	ENSG00000029993	HMGB3
ENSG00000189060	3058.04	-0.26934	0.0534951	-5.03485	4.78212e-07	1.4344e-05	ENSG00000189060	H1F0
ENSG00000157657	1615.05	-0.26948	0.0675093	-3.99175	6.55873e-05	0.00117375	ENSG00000157657	ZNF618
ENSG00000169071	1292.71	-0.269631	0.0905697	-2.97706	0.00291031	0.0300123	ENSG00000169071	ROR2
ENSG00000099284	648.788	-0.269736	0.0785686	-3.43312	0.000596669	0.00801044	ENSG00000099284	H2AFY2
ENSG00000198682	18902.4	-0.270663	0.0725216	-3.73217	0.000189835	0.00298585	ENSG00000198682	PAPSS2
ENSG00000116141	1428.18	-0.271152	0.0695244	-3.9001	9.61547e-05	0.00162724	ENSG00000116141	MARK1
ENSG00000174437	34703.7	-0.271406	0.0523263	-5.18679	2.13952e-07	6.80165e-06	ENSG00000174437	ATP2A2
ENSG00000198796	5861.04	-0.271963	0.046145	-5.89367	3.777e-09	1.7136e-07	ENSG00000198796	ALPK2
ENSG00000175048	656.013	-0.27244	0.0742642	-3.66852	0.000243961	0.00373006	ENSG00000175048	ZDHHC14
ENSG00000198185	405.395	-0.272659	0.0960749	-2.83798	0.00453999	0.0425517	ENSG00000198185	ZNF334
ENSG00000056558	253.652	-0.273004	0.0939165	-2.90688	0.00365054	0.036159	ENSG00000056558	TRAF1
ENSG00000101347	1135.49	-0.273342	0.0618454	-4.41977	9.88079e-06	0.000219186	ENSG00000101347	SAMHD1
ENSG00000182179	1471.87	-0.273362	0.0887333	-3.08072	0.00206504	0.0225308	ENSG00000182179	UBA7
ENSG00000173559	5075.13	-0.273746	0.0643582	-4.25348	2.1047e-05	0.00043187	ENSG00000173559	NABP1
ENSG00000109756	3533.37	-0.273831	0.0607995	-4.50384	6.67364e-06	0.000155091	ENSG00000109756	RAPGEF2
ENSG00000184584	2427.37	-0.274214	0.096386	-2.84496	0.0044417	0.0418761	ENSG00000184584	TMEM173
ENSG00000119711	724.142	-0.274715	0.0726797	-3.7798	0.000156957	0.00252375	ENSG00000119711	ALDH6A1
ENSG00000104361	2907.44	-0.275547	0.0857874	-3.21197	0.00131829	0.0154976	ENSG00000104361	NIPAL2
ENSG00000235105	425.27	-0.275753	0.079582	-3.46502	0.000530188	0.00724725	ENSG00000235105	RP11-329A14.1
ENSG00000169902	851.771	-0.275999	0.0884876	-3.11907	0.00181423	0.0200732	ENSG00000169902	TPST1
ENSG00000117280	1517.53	-0.276476	0.0569627	-4.85363	1.21219e-06	3.33666e-05	ENSG00000117280	RAB29
ENSG00000185305	826.383	-0.277343	0.0818261	-3.38942	0.000700395	0.00918449	ENSG00000185305	ARL15
ENSG00000158470	3888.42	-0.278248	0.0492958	-5.64446	1.657e-08	6.70863e-07	ENSG00000158470	B4GALT5
ENSG00000169604	16806.2	-0.279124	0.0566027	-4.93129	8.16882e-07	2.30836e-05	ENSG00000169604	ANTXR1
ENSG00000237973	364.651	-0.279334	0.0936545	-2.9826	0.00285812	0.0296263	ENSG00000237973	MTCO1P12
ENSG00000198431	51284.4	-0.279662	0.0513267	-5.44867	5.07485e-08	1.87013e-06	ENSG00000198431	TXNRD1
ENSG00000268388	463.033	-0.279679	0.0786612	-3.55549	0.000377273	0.00537257	ENSG00000268388	FENDRR
ENSG00000133943	921.548	-0.279831	0.0743268	-3.76488	0.000166632	0.00266272	ENSG00000133943	C14orf159
ENSG00000229644	2009.08	-0.28008	0.079734	-3.51268	0.000443611	0.00617126	ENSG00000229644	NAMPTP1
ENSG00000115109	798.481	-0.280259	0.0648955	-4.31861	1.57012e-05	0.000333548	ENSG00000115109	EPB41L5
ENSG00000011465	41404.4	-0.280568	0.0914987	-3.06636	0.00216681	0.0234851	ENSG00000011465	DCN
ENSG00000233859	1929.8	-0.28087	0.0649158	-4.32668	1.51374e-05	0.00032233	ENSG00000233859	ADH5P4
ENSG00000180346	1378.49	-0.281038	0.0633268	-4.4379	9.08417e-06	0.000203505	ENSG00000180346	TIGD2
ENSG00000213699	3109.7	-0.282145	0.0732853	-3.84995	0.00011814	0.00194997	ENSG00000213699	SLC35F6
ENSG00000253910	356.273	-0.282729	0.0934289	-3.02614	0.00247696	0.0262788	ENSG00000253910	PCDHGB2
ENSG00000154736	2568.95	-0.282925	0.0681494	-4.15154	3.30251e-05	0.000645384	ENSG00000154736	ADAMTS5
ENSG00000011454	3663.6	-0.283276	0.0450957	-6.28167	3.34955e-10	1.91402e-08	ENSG00000011454	RABGAP1
ENSG00000110042	1562.39	-0.283478	0.0573985	-4.93877	7.86167e-07	2.2326e-05	ENSG00000110042	DTX4
ENSG00000164307	4961.57	-0.283613	0.0591039	-4.79854	1.59822e-06	4.2628e-05	ENSG00000164307	ERAP1
ENSG00000150995	328.787	-0.28457	0.0957916	-2.97072	0.00297099	0.0304468	ENSG00000150995	ITPR1
ENSG00000136874	929.032	-0.285775	0.0817912	-3.49396	0.000475918	0.00658013	ENSG00000136874	STX17
ENSG00000088448	1477.92	-0.285792	0.0765246	-3.73464	0.000187982	0.00296712	ENSG00000088448	ANKRD10
ENSG00000101265	1458.44	-0.2858	0.0870939	-3.28152	0.00103251	0.0126485	ENSG00000101265	RASSF2
ENSG00000082146	923.416	-0.286127	0.0635557	-4.50199	6.73209e-06	0.000156249	ENSG00000082146	STRADB
ENSG00000104687	2453.94	-0.286183	0.0571292	-5.00941	5.45983e-07	1.62152e-05	ENSG00000104687	GSR
ENSG00000064692	404.486	-0.28643	0.0985678	-2.90592	0.00366175	0.0362501	ENSG00000064692	SNCAIP
ENSG00000111058	354.142	-0.286954	0.0955741	-3.00243	0.00267838	0.0281435	ENSG00000111058	ACSS3
ENSG00000197894	10189	-0.287869	0.045347	-6.34813	2.17953e-10	1.28195e-08	ENSG00000197894	ADH5
ENSG00000095015	947.883	-0.28811	0.0723111	-3.98431	6.76778e-05	0.001204	ENSG00000095015	MAP3K1
ENSG00000139508	603.827	-0.288149	0.0847312	-3.40074	0.000672027	0.00887694	ENSG00000139508	SLC46A3
ENSG00000109458	1317.36	-0.288619	0.0674128	-4.28137	1.85744e-05	0.000387296	ENSG00000109458	GAB1
ENSG00000119314	4640.43	-0.289082	0.0693682	-4.16736	3.08145e-05	0.000608772	ENSG00000119314	PTBP3
ENSG00000107438	4434.9	-0.289675	0.0632415	-4.58045	4.63975e-06	0.000112759	ENSG00000107438	PDLIM1
ENSG00000093072	470.486	-0.290581	0.0833275	-3.48722	0.000488075	0.00672477	ENSG00000093072	CECR1
ENSG00000170581	7506.58	-0.29175	0.0601814	-4.84785	1.24808e-06	3.42503e-05	ENSG00000170581	STAT2
ENSG00000172379	3902.56	-0.292117	0.0657024	-4.44606	8.74583e-06	0.000196667	ENSG00000172379	ARNT2
ENSG00000157601	517.631	-0.292331	0.0895173	-3.26564	0.00109217	0.0132893	ENSG00000157601	MX1
ENSG00000107249	1621.46	-0.292416	0.0580341	-5.0387	4.68715e-07	1.4106e-05	ENSG00000107249	GLIS3
ENSG00000138439	265.028	-0.292754	0.105538	-2.77393	0.00553839	0.0495083	ENSG00000138439	FAM117B
ENSG00000184557	2515.52	-0.293219	0.0789984	-3.71171	0.000205867	0.00320738	ENSG00000184557	SOCS3
ENSG00000253276	4382.82	-0.29347	0.058665	-5.00247	5.66004e-07	1.67272e-05	ENSG00000253276	CCDC71L
ENSG00000165029	2600.51	-0.293741	0.0629797	-4.66405	3.10046e-06	7.83007e-05	ENSG00000165029	ABCA1
ENSG00000115267	343.74	-0.293878	0.0925628	-3.1749	0.00149887	0.0171298	ENSG00000115267	IFIH1
ENSG00000104763	4678.87	-0.29419	0.052764	-5.57557	2.46719e-08	9.6638e-07	ENSG00000104763	ASAH1
ENSG00000162437	443.778	-0.29448	0.0759423	-3.87768	0.000105459	0.00176159	ENSG00000162437	RAVER2
ENSG00000163249	1126.91	-0.294915	0.0855105	-3.44888	0.00056292	0.00764259	ENSG00000163249	CCNYL1
ENSG00000130224	912.643	-0.295479	0.0792451	-3.72868	0.000192489	0.00301978	ENSG00000130224	LRCH2
ENSG00000139112	16790.9	-0.295953	0.0423924	-6.98126	2.9254e-12	2.21021e-10	ENSG00000139112	GABARAPL1
ENSG00000102445	235.433	-0.296784	0.0986318	-3.00901	0.00262099	0.0276444	ENSG00000102445	RUBCNL
ENSG00000058668	56388.8	-0.296829	0.0447047	-6.63978	3.14157e-11	2.06281e-09	ENSG00000058668	ATP2B4
ENSG00000129480	736.181	-0.297126	0.0928725	-3.19929	0.00137766	0.0160031	ENSG00000129480	DTD2
ENSG00000135828	967.162	-0.297784	0.0714869	-4.16557	3.10572e-05	0.000612025	ENSG00000135828	RNASEL
ENSG00000167323	4719.46	-0.298001	0.0726269	-4.10318	4.07513e-05	0.000779498	ENSG00000167323	STIM1
ENSG00000128656	1362.34	-0.298362	0.0678441	-4.39776	1.09376e-05	0.000240561	ENSG00000128656	CHN1
ENSG00000134324	1975.99	-0.298958	0.0584157	-5.11776	3.09181e-07	9.51088e-06	ENSG00000134324	LPIN1
ENSG00000166398	2162.45	-0.299382	0.0766537	-3.90564	9.39767e-05	0.00159787	ENSG00000166398	KIAA0355
ENSG00000085511	984.563	-0.299595	0.0698839	-4.28703	1.81075e-05	0.000378434	ENSG00000085511	MAP3K4
ENSG00000165209	359.185	-0.299665	0.0947304	-3.16335	0.00155964	0.0176789	ENSG00000165209	STRBP
ENSG00000075391	3078.22	-0.30028	0.0429016	-6.99926	2.57316e-12	1.95225e-10	ENSG00000075391	RASAL2
ENSG00000255455	250.745	-0.300499	0.104234	-2.88292	0.0039401	0.0381482	ENSG00000255455	RP11-890B15.3
ENSG00000112378	12963.6	-0.301074	0.0679312	-4.43205	9.33432e-06	0.000208601	ENSG00000112378	PERP
ENSG00000162650	385.971	-0.301265	0.106514	-2.82842	0.00467784	0.0434128	ENSG00000162650	ATXN7L2
ENSG00000114126	1724.72	-0.301952	0.074824	-4.0355	5.44871e-05	0.00100498	ENSG00000114126	TFDP2
ENSG00000078804	1621.62	-0.303322	0.0657766	-4.6114	3.99969e-06	9.92067e-05	ENSG00000078804	TP53INP2
ENSG00000021355	1389.23	-0.303477	0.064147	-4.73096	2.23455e-06	5.80854e-05	ENSG00000021355	SERPINB1
ENSG00000213070	198.975	-0.303592	0.102765	-2.95425	0.00313434	0.0319035	ENSG00000213070	HMGB3P6
ENSG00000111912	2585.69	-0.304498	0.0736256	-4.13577	3.53771e-05	0.000689109	ENSG00000111912	NCOA7
ENSG00000072422	2505.58	-0.304582	0.0609585	-4.99654	5.83666e-07	1.71092e-05	ENSG00000072422	RHOBTB1
ENSG00000154217	437.193	-0.304626	0.0779815	-3.90639	9.36854e-05	0.00159691	ENSG00000154217	PITPNC1
ENSG00000170222	417.654	-0.305193	0.0953705	-3.20008	0.0013739	0.0159849	ENSG00000170222	ADPRM
ENSG00000221817	192.673	-0.305209	0.101488	-3.00734	0.00263541	0.0277478	ENSG00000221817	PPP3CB-AS1
ENSG00000176485	738.684	-0.306093	0.0736955	-4.15349	3.27449e-05	0.000640601	ENSG00000176485	PLA2G16
ENSG00000236609	635.87	-0.306508	0.0760343	-4.03118	5.54972e-05	0.00102152	ENSG00000236609	ZNF853
ENSG00000135775	1060.99	-0.306616	0.062711	-4.88935	1.01171e-06	2.8367e-05	ENSG00000135775	COG2
ENSG00000168306	323.496	-0.307459	0.0925752	-3.32118	0.000896378	0.0112637	ENSG00000168306	ACOX2
ENSG00000128699	3214.28	-0.307541	0.0688531	-4.46663	7.94609e-06	0.000180481	ENSG00000128699	ORMDL1
ENSG00000143344	1334.77	-0.307931	0.0959647	-3.2088	0.00133291	0.0156288	ENSG00000143344	RGL1
ENSG00000134824	15371.2	-0.308115	0.0879383	-3.50376	0.000458734	0.00636203	ENSG00000134824	FADS2
ENSG00000262576	393.079	-0.308337	0.0897224	-3.43656	0.000589151	0.00792746	ENSG00000262576	PCDHGA4
ENSG00000107186	3214.91	-0.308599	0.052322	-5.89808	3.67756e-09	1.67691e-07	ENSG00000107186	MPDZ
ENSG00000111371	16198	-0.309024	0.0522819	-5.91072	3.40612e-09	1.56499e-07	ENSG00000111371	SLC38A1
ENSG00000138821	646.65	-0.309042	0.0812205	-3.80498	0.000141818	0.00230495	ENSG00000138821	SLC39A8
ENSG00000112425	335.947	-0.309558	0.0974496	-3.1766	0.00149015	0.0170517	ENSG00000112425	EPM2A
ENSG00000198964	1394.17	-0.310255	0.0672667	-4.61232	3.98208e-06	9.90157e-05	ENSG00000198964	SGMS1
ENSG00000196693	700.141	-0.310999	0.0847824	-3.6682	0.000244263	0.00373152	ENSG00000196693	ZNF33B
ENSG00000173641	874.404	-0.311416	0.0862131	-3.61217	0.00030365	0.00450905	ENSG00000173641	HSPB7
ENSG00000153814	1651.42	-0.311502	0.0924749	-3.3685	0.000755773	0.00980388	ENSG00000153814	JAZF1
ENSG00000078124	1214.29	-0.311528	0.0700184	-4.44923	8.61791e-06	0.000194032	ENSG00000078124	ACER3
ENSG00000016082	489.652	-0.311976	0.0789718	-3.95048	7.79946e-05	0.00136275	ENSG00000016082	ISL1
ENSG00000154822	333.791	-0.313267	0.0985578	-3.17851	0.00148033	0.0169825	ENSG00000154822	PLCL2
ENSG00000075643	1637.56	-0.313851	0.068746	-4.56537	4.98616e-06	0.000119728	ENSG00000075643	MOCOS
ENSG00000172403	9154.54	-0.314111	0.0626226	-5.01594	5.27747e-07	1.57253e-05	ENSG00000172403	SYNPO2
ENSG00000176697	3400.94	-0.314413	0.0569817	-5.51778	3.43311e-08	1.31061e-06	ENSG00000176697	BDNF
ENSG00000080503	6225.74	-0.314579	0.050032	-6.28756	3.22493e-10	1.85454e-08	ENSG00000080503	SMARCA2
ENSG00000165288	1252.46	-0.314995	0.080292	-3.92311	8.74114e-05	0.00150466	ENSG00000165288	BRWD3
ENSG00000181274	203.216	-0.315026	0.109925	-2.86582	0.00415934	0.0398014	ENSG00000181274	FRAT2
ENSG00000206149	265.56	-0.315121	0.104744	-3.0085	0.00262542	0.0276588	ENSG00000206149	HERC2P9
ENSG00000157796	1510.17	-0.317196	0.0755628	-4.19778	2.69544e-05	0.000540196	ENSG00000157796	WDR19
ENSG00000161921	291.932	-0.317648	0.0967951	-3.28166	0.00103199	0.0126485	ENSG00000161921	CXCL16
ENSG00000107560	1595.13	-0.318431	0.0694741	-4.58345	4.57373e-06	0.000111455	ENSG00000107560	RAB11FIP2
ENSG00000088280	1878.03	-0.31929	0.0753802	-4.23572	2.27817e-05	0.000464823	ENSG00000088280	ASAP3
ENSG00000164542	187.828	-0.319675	0.108128	-2.95646	0.00311196	0.0317294	ENSG00000164542	KIAA0895
ENSG00000134775	3400.41	-0.319968	0.0576086	-5.55417	2.78939e-08	1.08552e-06	ENSG00000134775	FHOD3
ENSG00000204634	605.139	-0.319987	0.0900251	-3.55442	0.000378807	0.00538822	ENSG00000204634	TBC1D8
ENSG00000087842	442.443	-0.321272	0.0903108	-3.55741	0.000374534	0.00535468	ENSG00000087842	PIR
ENSG00000182326	24864.5	-0.321614	0.0538577	-5.97156	2.34993e-09	1.1196e-07	ENSG00000182326	C1S
ENSG00000082438	5842.8	-0.322003	0.0543607	-5.92345	3.15254e-09	1.46338e-07	ENSG00000082438	COBLL1
ENSG00000007237	263.951	-0.322019	0.0982155	-3.27869	0.00104288	0.0127584	ENSG00000007237	GAS7
ENSG00000168016	1968.82	-0.322539	0.0746303	-4.32183	1.54743e-05	0.000329117	ENSG00000168016	TRANK1
ENSG00000184719	350.411	-0.322674	0.0907219	-3.55673	0.000375494	0.00536416	ENSG00000184719	RNLS
ENSG00000171310	234.188	-0.323388	0.108673	-2.97578	0.00292244	0.030103	ENSG00000171310	CHST11
ENSG00000132825	451.949	-0.324721	0.0870109	-3.73196	0.000189995	0.00298585	ENSG00000132825	PPP1R3D
ENSG00000053254	4589.19	-0.325185	0.0712659	-4.56298	5.04333e-06	0.000120779	ENSG00000053254	FOXN3
ENSG00000111554	457.36	-0.325308	0.0827638	-3.93056	8.47483e-05	0.00146721	ENSG00000111554	MDM1
ENSG00000120149	434.907	-0.325476	0.112866	-2.88373	0.00392998	0.0380707	ENSG00000120149	MSX2
ENSG00000176771	1189.85	-0.325581	0.0804027	-4.04938	5.13532e-05	0.000953016	ENSG00000176771	NCKAP5
ENSG00000095203	198.943	-0.326254	0.116597	-2.79813	0.00513994	0.0468274	ENSG00000095203	EPB41L4B
ENSG00000102755	8716.24	-0.326315	0.0683651	-4.77312	1.81398e-06	4.77478e-05	ENSG00000102755	FLT1
ENSG00000182263	367.584	-0.326331	0.101933	-3.20143	0.00136749	0.0159308	ENSG00000182263	FIGN
ENSG00000119922	951.521	-0.326774	0.0707901	-4.6161	3.91026e-06	9.73897e-05	ENSG00000119922	IFIT2
ENSG00000142910	5123.4	-0.327057	0.11245	-2.90845	0.00363222	0.0360364	ENSG00000142910	TINAGL1
ENSG00000175155	710.895	-0.327851	0.0915747	-3.58015	0.000343398	0.00497651	ENSG00000175155	YPEL2
ENSG00000119326	8570.17	-0.328252	0.0713839	-4.59841	4.25724e-06	0.000104447	ENSG00000119326	CTNNAL1
ENSG00000103811	1094.59	-0.328864	0.0895188	-3.67369	0.000239076	0.00367092	ENSG00000103811	CTSH
ENSG00000141458	6257.73	-0.329311	0.0783117	-4.20514	2.60926e-05	0.000525256	ENSG00000141458	NPC1
ENSG00000173193	3471.44	-0.329427	0.0726154	-4.5366	5.71692e-06	0.000135295	ENSG00000173193	PARP14
ENSG00000100344	192.003	-0.329913	0.110687	-2.98059	0.00287697	0.0297704	ENSG00000100344	PNPLA3
ENSG00000169087	191.75	-0.330828	0.107569	-3.07551	0.00210144	0.0228865	ENSG00000169087	HSPBAP1
ENSG00000185339	342.959	-0.331617	0.11059	-2.99861	0.00271215	0.0284398	ENSG00000185339	TCN2
ENSG00000155850	1824.22	-0.331856	0.0776163	-4.2756	1.90624e-05	0.000396098	ENSG00000155850	SLC26A2
ENSG00000056998	611.325	-0.332756	0.0754661	-4.40935	1.03682e-05	0.000229154	ENSG00000056998	GYG2
ENSG00000198743	765.437	-0.332911	0.0724611	-4.59434	4.34115e-06	0.000106361	ENSG00000198743	SLC5A3
ENSG00000113645	238.412	-0.333388	0.116959	-2.85047	0.00436541	0.0414438	ENSG00000113645	WWC1
ENSG00000135469	263.447	-0.33347	0.100462	-3.31936	0.000902249	0.0113138	ENSG00000135469	COQ10A
ENSG00000168779	1063.12	-0.333516	0.0707061	-4.71693	2.39427e-06	6.16738e-05	ENSG00000168779	SHOX2
ENSG00000157110	4538.75	-0.333604	0.0548129	-6.08623	1.15597e-09	5.81429e-08	ENSG00000157110	RBPMS
ENSG00000198945	808.216	-0.334494	0.105683	-3.16507	0.00155047	0.0176295	ENSG00000198945	L3MBTL3
ENSG00000165821	692.464	-0.334604	0.0873698	-3.82974	0.000128278	0.00210574	ENSG00000165821	SALL2
ENSG00000083290	1975.66	-0.334768	0.0597446	-5.60331	2.10295e-08	8.3457e-07	ENSG00000083290	ULK2
ENSG00000113231	800.162	-0.334914	0.0735378	-4.55432	5.25564e-06	0.000125365	ENSG00000113231	PDE8B
ENSG00000164236	1340.41	-0.334989	0.0700788	-4.78017	1.75143e-06	4.61688e-05	ENSG00000164236	ANKRD33B
ENSG00000132846	869.466	-0.3357	0.0743956	-4.51236	6.41101e-06	0.000150147	ENSG00000132846	ZBED3
ENSG00000138413	5815.33	-0.337916	0.0672933	-5.02154	5.12576e-07	1.52985e-05	ENSG00000138413	IDH1
ENSG00000197892	466.096	-0.337998	0.105651	-3.19919	0.00137812	0.0160031	ENSG00000197892	KIF13B
ENSG00000158290	22682.6	-0.338626	0.0843834	-4.01295	5.99652e-05	0.00108823	ENSG00000158290	CUL4B
ENSG00000073910	3624.61	-0.338633	0.0625597	-5.41296	6.19914e-08	2.25227e-06	ENSG00000073910	FRY
ENSG00000166347	2567.77	-0.339225	0.0764287	-4.43845	9.06101e-06	0.000203248	ENSG00000166347	CYB5A
ENSG00000182771	802.382	-0.33965	0.0881188	-3.85445	0.000115989	0.00191795	ENSG00000182771	GRID1
ENSG00000111275	1709.52	-0.340005	0.0628628	-5.40868	6.34897e-08	2.30207e-06	ENSG00000111275	ALDH2
ENSG00000101210	3002.39	-0.340483	0.111127	-3.0639	0.00218472	0.023665	ENSG00000101210	EEF1A2
ENSG00000160712	781.144	-0.340665	0.0659632	-5.16447	2.4112e-07	7.57202e-06	ENSG00000160712	IL6R
ENSG00000279041	130.653	-0.341001	0.119856	-2.8451	0.00443979	0.0418761	ENSG00000279041	CTD-2373N4.3
ENSG00000172987	6.10246	-0.341329	0.11411	-2.99123	0.00277858	0.0289681	ENSG00000172987	HPSE2
ENSG00000139209	519.628	-0.341384	0.0929495	-3.67279	0.000239918	0.00367759	ENSG00000139209	SLC38A4
ENSG00000158856	165.466	-0.342599	0.109075	-3.14094	0.00168404	0.0189109	ENSG00000158856	DMTN
ENSG00000125730	666.92	-0.342895	0.0799337	-4.28974	1.78881e-05	0.000374281	ENSG00000125730	C3
ENSG00000133216	1223.37	-0.34349	0.0740609	-4.63794	3.51897e-06	8.80084e-05	ENSG00000133216	EPHB2
ENSG00000163629	10143.9	-0.343503	0.0623262	-5.51137	3.56047e-08	1.3535e-06	ENSG00000163629	PTPN13
ENSG00000183111	155.986	-0.343525	0.119234	-2.88111	0.00396272	0.0382851	ENSG00000183111	ARHGEF37
ENSG00000127311	235.838	-0.343973	0.107621	-3.19616	0.00139272	0.0161207	ENSG00000127311	HELB
ENSG00000180447	6371.84	-0.345062	0.0751985	-4.58868	4.46067e-06	0.000108994	ENSG00000180447	GAS1
ENSG00000147894	202.293	-0.346576	0.101797	-3.40457	0.000662671	0.0087855	ENSG00000147894	C9orf72
ENSG00000109667	266.177	-0.346644	0.123172	-2.81432	0.00488804	0.0448948	ENSG00000109667	SLC2A9
ENSG00000205181	341.844	-0.346761	0.096337	-3.59946	0.000318883	0.00467755	ENSG00000205181	LINC00654
ENSG00000125965	356.941	-0.349243	0.0981572	-3.558	0.000373689	0.00534683	ENSG00000125965	GDF5
ENSG00000116117	2889.43	-0.349876	0.076919	-4.54863	5.39953e-06	0.00012812	ENSG00000116117	PARD3B
ENSG00000253537	417.764	-0.35042	0.0880864	-3.97814	6.94576e-05	0.0012272	ENSG00000253537	PCDHGA7
ENSG00000138829	37728.5	-0.350727	0.0718242	-4.88314	1.0441e-06	2.91848e-05	ENSG00000138829	FBN2
ENSG00000101825	13619.4	-0.351376	0.0727071	-4.83276	1.34654e-06	3.66182e-05	ENSG00000101825	MXRA5
ENSG00000178031	290.512	-0.351893	0.117366	-2.99826	0.00271529	0.0284562	ENSG00000178031	ADAMTSL1
ENSG00000258647	7.95196	-0.351942	0.12582	-2.79719	0.00515491	0.0469164	ENSG00000258647	LINC00930
ENSG00000090376	1096.44	-0.352405	0.0747221	-4.71621	2.40281e-06	6.18057e-05	ENSG00000090376	IRAK3
ENSG00000102409	1415.99	-0.352433	0.057862	-6.09092	1.12266e-09	5.6784e-08	ENSG00000102409	BEX4
ENSG00000159403	25358.5	-0.352716	0.0537528	-6.56181	5.31579e-11	3.42812e-09	ENSG00000159403	C1R
ENSG00000082397	3999.8	-0.352767	0.0507553	-6.95036	3.6436e-12	2.7187e-10	ENSG00000082397	EPB41L3
ENSG00000203727	2573.27	-0.353002	0.0609689	-5.78986	7.0445e-09	3.03586e-07	ENSG00000203727	SAMD5
ENSG00000188313	696.583	-0.353212	0.0806299	-4.38066	1.18321e-05	0.000259287	ENSG00000188313	PLSCR1
ENSG00000088881	226.948	-0.353601	0.122353	-2.89	0.00385241	0.0376627	ENSG00000088881	EBF4
ENSG00000072657	931.232	-0.353857	0.0958985	-3.68991	0.000224332	0.0034622	ENSG00000072657	TRHDE
ENSG00000247572	180.849	-0.353881	0.110452	-3.20394	0.00135563	0.0158232	ENSG00000247572	CKMT2-AS1
ENSG00000107562	5575.79	-0.354634	0.0903291	-3.92603	8.6361e-05	0.00149135	ENSG00000107562	CXCL12
ENSG00000165072	417.61	-0.354699	0.0977641	-3.6281	0.000285509	0.00427458	ENSG00000165072	MAMDC2
ENSG00000106780	969.361	-0.355097	0.0927924	-3.82678	0.000129829	0.00212919	ENSG00000106780	MEGF9
ENSG00000171365	866.825	-0.355458	0.0773738	-4.59404	4.34745e-06	0.000106371	ENSG00000171365	CLCN5
ENSG00000166482	6099.47	-0.35556	0.0735099	-4.8369	1.3188e-06	3.59722e-05	ENSG00000166482	MFAP4
ENSG00000166342	458.402	-0.355865	0.0877215	-4.05676	4.97574e-05	0.000931056	ENSG00000166342	NETO1
ENSG00000152939	190.696	-0.355948	0.111327	-3.19733	0.00138707	0.0160657	ENSG00000152939	MARVELD2
ENSG00000169760	517.72	-0.356062	0.0991713	-3.59038	0.000330199	0.00480839	ENSG00000169760	NLGN1
ENSG00000103196	6947.07	-0.356094	0.0815114	-4.36864	1.2502e-05	0.000272315	ENSG00000103196	CRISPLD2
ENSG00000237523	228.208	-0.356153	0.102998	-3.45788	0.000544451	0.00741414	ENSG00000237523	LINC00857
ENSG00000020633	161.501	-0.357139	0.112259	-3.18139	0.00146573	0.016847	ENSG00000020633	RUNX3
ENSG00000158555	762.641	-0.357818	0.12447	-2.87474	0.00404357	0.0389412	ENSG00000158555	GDPD5
ENSG00000183579	376.437	-0.357926	0.0924156	-3.873	0.000107502	0.00178909	ENSG00000183579	ZNRF3
ENSG00000004866	1204.42	-0.358673	0.0809804	-4.42914	9.46107e-06	0.000210912	ENSG00000004866	ST7
ENSG00000169193	377.88	-0.359493	0.0931438	-3.85955	0.000113596	0.0018853	ENSG00000169193	CCDC126
ENSG00000185745	1345.26	-0.360136	0.082887	-4.3449	1.39338e-05	0.00029917	ENSG00000185745	IFIT1
ENSG00000116667	1952.45	-0.360713	0.0818299	-4.40808	1.04293e-05	0.000230222	ENSG00000116667	C1orf21
ENSG00000236333	155.816	-0.361259	0.125272	-2.88379	0.00392925	0.0380707	ENSG00000236333	TRHDE-AS1
ENSG00000165092	167433	-0.361559	0.0592867	-6.09848	1.07084e-09	5.47765e-08	ENSG00000165092	ALDH1A1
ENSG00000145439	543.747	-0.361794	0.0843167	-4.29089	1.77957e-05	0.000373214	ENSG00000145439	CBR4
ENSG00000256810	6.6417	-0.361889	0.124761	-2.90066	0.00372381	0.0367114	ENSG00000256810	RP11-76C10.2
ENSG00000100439	3965.89	-0.362258	0.0680808	-5.32101	1.03194e-07	3.57652e-06	ENSG00000100439	ABHD4
ENSG00000249669	413.79	-0.362844	0.0946992	-3.83154	0.000127342	0.00209539	ENSG00000249669	CARMN
ENSG00000099337	2545.85	-0.362988	0.0776322	-4.67574	2.92891e-06	7.43843e-05	ENSG00000099337	KCNK6
ENSG00000124126	202.541	-0.363067	0.115162	-3.15267	0.00161785	0.018256	ENSG00000124126	PREX1
ENSG00000112096	10753.7	-0.363971	0.0736996	-4.93858	7.86931e-07	2.2326e-05	ENSG00000112096	SOD2
ENSG00000176595	341.424	-0.364028	0.090593	-4.01828	5.86233e-05	0.00106745	ENSG00000176595	KBTBD11
ENSG00000124788	3754.14	-0.365281	0.0568297	-6.42764	1.29597e-10	7.98682e-09	ENSG00000124788	ATXN1
ENSG00000071282	8307.49	-0.365311	0.0692386	-5.27612	1.31946e-07	4.40398e-06	ENSG00000071282	LMCD1
ENSG00000123595	1059.91	-0.366404	0.0839283	-4.36568	1.26727e-05	0.000275367	ENSG00000123595	RAB9A
ENSG00000119917	1270.34	-0.367299	0.0774293	-4.74367	2.09879e-06	5.50842e-05	ENSG00000119917	IFIT3
ENSG00000171385	1235.23	-0.367438	0.0647115	-5.6781	1.36202e-08	5.64083e-07	ENSG00000171385	KCND3
ENSG00000246090	171.799	-0.36821	0.104254	-3.53185	0.000412665	0.00579432	ENSG00000246090	RP11-696N14.1
ENSG00000180263	739.187	-0.368288	0.066737	-5.5185	3.41903e-08	1.308e-06	ENSG00000180263	FGD6
ENSG00000112078	15279.1	-0.368653	0.059177	-6.22966	4.67459e-10	2.5972e-08	ENSG00000112078	KCTD20
ENSG00000126803	2270.09	-0.368764	0.0804283	-4.58501	4.53966e-06	0.000110774	ENSG00000126803	HSPA2
ENSG00000048707	3987.07	-0.369009	0.0605696	-6.09231	1.11294e-09	5.64507e-08	ENSG00000048707	VPS13D
ENSG00000078687	574.009	-0.369103	0.0945759	-3.90272	9.51193e-05	0.00161426	ENSG00000078687	TNRC6C
ENSG00000095739	290.529	-0.369645	0.0934133	-3.95709	7.58683e-05	0.00133005	ENSG00000095739	BAMBI
ENSG00000079101	294.475	-0.370057	0.101973	-3.62898	0.000284538	0.00426737	ENSG00000079101	CLUL1
ENSG00000163840	2381.56	-0.37013	0.0580885	-6.37184	1.86777e-10	1.12047e-08	ENSG00000163840	DTX3L
ENSG00000177570	734.67	-0.37082	0.101638	-3.64844	0.000263839	0.00400012	ENSG00000177570	SAMD12
ENSG00000133106	168.615	-0.371137	0.117284	-3.16443	0.00155387	0.0176379	ENSG00000133106	EPSTI1
ENSG00000260244	7.33383	-0.372457	0.125442	-2.96916	0.00298615	0.0305819	ENSG00000260244	RP11-588K22.2
ENSG00000151892	6067.97	-0.373065	0.0440181	-8.47526	2.34555e-17	3.18449e-15	ENSG00000151892	GFRA1
ENSG00000133026	10770.6	-0.374223	0.0496539	-7.53664	4.82247e-14	4.46561e-12	ENSG00000133026	MYH10
ENSG00000136869	1278.36	-0.37462	0.0677504	-5.52941	3.21305e-08	1.23706e-06	ENSG00000136869	TLR4
ENSG00000134470	231.097	-0.374694	0.105377	-3.55575	0.000376907	0.00537257	ENSG00000134470	IL15RA
ENSG00000182287	1529.33	-0.375734	0.0882415	-4.25802	2.0625e-05	0.000424175	ENSG00000182287	AP1S2
ENSG00000137507	192.692	-0.377619	0.112694	-3.35085	0.000805635	0.0103466	ENSG00000137507	LRRC32
ENSG00000213949	1165.58	-0.378139	0.0888409	-4.25636	2.07782e-05	0.00042684	ENSG00000213949	ITGA1
ENSG00000276855	185.242	-0.378508	0.106054	-3.56903	0.000358308	0.00515946	ENSG00000276855	CTD-3157E16.2
ENSG00000156804	744.883	-0.378685	0.123412	-3.06845	0.00215169	0.0233914	ENSG00000156804	FBXO32
ENSG00000151090	788.992	-0.378839	0.0780385	-4.85451	1.20683e-06	3.32698e-05	ENSG00000151090	THRB
ENSG00000164949	523.669	-0.379039	0.0850606	-4.4561	8.34628e-06	0.000188858	ENSG00000164949	GEM
ENSG00000026652	484.614	-0.379236	0.0812433	-4.6679	3.04289e-06	7.69543e-05	ENSG00000026652	AGPAT4
ENSG00000196227	824.959	-0.380257	0.0644079	-5.90389	3.55032e-09	1.62299e-07	ENSG00000196227	FAM217B
ENSG00000086289	3005.78	-0.381211	0.0510586	-7.46616	8.25704e-14	7.3447e-12	ENSG00000086289	EPDR1
ENSG00000135903	498.078	-0.381665	0.0740773	-5.15225	2.5738e-07	8.02678e-06	ENSG00000135903	PAX3
ENSG00000121316	115.134	-0.381784	0.120425	-3.17031	0.00152276	0.0173698	ENSG00000121316	PLBD1
ENSG00000187824	279.364	-0.381872	0.105817	-3.60882	0.000307597	0.00455643	ENSG00000187824	TMEM220
ENSG00000108984	427.237	-0.382926	0.116096	-3.29835	0.000972555	0.012067	ENSG00000108984	MAP2K6
ENSG00000005020	1178.44	-0.383457	0.0795352	-4.82122	1.42683e-06	3.85693e-05	ENSG00000005020	SKAP2
ENSG00000154678	4995.74	-0.383725	0.0726854	-5.27925	1.29711e-07	4.33738e-06	ENSG00000154678	PDE1C
ENSG00000158286	554.699	-0.384757	0.114943	-3.34737	0.000815821	0.0104408	ENSG00000158286	RNF207
ENSG00000153029	1984.01	-0.385639	0.064706	-5.95987	2.52436e-09	1.19326e-07	ENSG00000153029	MR1
ENSG00000127241	20803.8	-0.386101	0.0505025	-7.6452	2.08623e-14	2.04734e-12	ENSG00000127241	MASP1
ENSG00000128510	5206.96	-0.38614	0.0612802	-6.30123	2.95299e-10	1.70905e-08	ENSG00000128510	CPA4
ENSG00000185630	8837.8	-0.386679	0.0662185	-5.83945	5.23746e-09	2.31796e-07	ENSG00000185630	PBX1
ENSG00000198873	1585.95	-0.387743	0.0618921	-6.26483	3.73238e-10	2.11936e-08	ENSG00000198873	GRK5
ENSG00000138386	2113.3	-0.389415	0.0852414	-4.56838	4.91519e-06	0.000118496	ENSG00000138386	NAB1
ENSG00000166473	101.806	-0.390091	0.137241	-2.84238	0.00447775	0.0421119	ENSG00000166473	PKD1L2
ENSG00000125538	162.611	-0.390803	0.123753	-3.15793	0.00158893	0.0179658	ENSG00000125538	IL1B
ENSG00000135931	4084.08	-0.391459	0.0629432	-6.21924	4.99579e-10	2.74191e-08	ENSG00000135931	ARMC9
ENSG00000226194	8.56602	-0.391512	0.137365	-2.85016	0.00436971	0.0414629	ENSG00000226194	RP1-137D17.1
ENSG00000162599	373.932	-0.391523	0.108917	-3.59468	0.000324786	0.00474591	ENSG00000162599	NFIA
ENSG00000136169	748.885	-0.392079	0.0691664	-5.66863	1.43945e-08	5.92078e-07	ENSG00000136169	SETDB2
ENSG00000077092	1236.55	-0.393102	0.0758884	-5.18	2.2188e-07	7.02894e-06	ENSG00000077092	RARB
ENSG00000162722	13.7413	-0.393306	0.138781	-2.83401	0.00459685	0.0429634	ENSG00000162722	TRIM58
ENSG00000163431	3437.82	-0.393946	0.0666993	-5.9063	3.49879e-09	1.60349e-07	ENSG00000163431	LMOD1
ENSG00000166448	901.515	-0.394087	0.106704	-3.69327	0.000221386	0.00342551	ENSG00000166448	TMEM130
ENSG00000145824	131.463	-0.394147	0.137119	-2.8745	0.00404673	0.0389509	ENSG00000145824	CXCL14
ENSG00000115841	316.643	-0.394569	0.112356	-3.51179	0.000445106	0.00618728	ENSG00000115841	RMDN2
ENSG00000183615	189.212	-0.394814	0.120087	-3.28774	0.00100995	0.0124313	ENSG00000183615	FAM167B
ENSG00000128487	1056.04	-0.395765	0.0758583	-5.21716	1.81692e-07	5.92204e-06	ENSG00000128487	SPECC1
ENSG00000172986	733.781	-0.396107	0.10889	-3.63769	0.000275092	0.00415329	ENSG00000172986	GXYLT2
ENSG00000046653	109.879	-0.396223	0.134469	-2.94657	0.00321316	0.032559	ENSG00000046653	GPM6B
ENSG00000182580	611.965	-0.398049	0.110154	-3.61357	0.000302012	0.00448842	ENSG00000182580	EPHB3
ENSG00000187134	284.016	-0.398203	0.101429	-3.92594	8.63907e-05	0.00149135	ENSG00000187134	AKR1C1
ENSG00000164418	935.016	-0.398355	0.0703554	-5.66203	1.4959e-08	6.12506e-07	ENSG00000164418	GRIK2
ENSG00000141338	113.552	-0.398386	0.140106	-2.84347	0.00446251	0.0419903	ENSG00000141338	ABCA8
ENSG00000178573	1254.32	-0.398913	0.0590915	-6.75076	1.47074e-11	1.02537e-09	ENSG00000178573	MAF
ENSG00000143190	640.171	-0.399125	0.0909786	-4.38702	1.14915e-05	0.000252436	ENSG00000143190	POU2F1
ENSG00000187068	128.344	-0.40108	0.119835	-3.34693	0.000817104	0.0104493	ENSG00000187068	C3orf70
ENSG00000164342	291.505	-0.401417	0.099765	-4.02363	5.7308e-05	0.00104844	ENSG00000164342	TLR3
ENSG00000139364	449.472	-0.402641	0.0937894	-4.29303	1.76251e-05	0.000370066	ENSG00000139364	TMEM132B
ENSG00000274370	151.59	-0.403776	0.128131	-3.15127	0.00162561	0.0183231	ENSG00000274370	AC144831.3
ENSG00000137502	2018.37	-0.403777	0.0810909	-4.97932	6.38091e-07	1.8554e-05	ENSG00000137502	RAB30
ENSG00000259495	75.3586	-0.40395	0.144132	-2.80264	0.00506864	0.0462245	ENSG00000259495	RP11-210M15.2
ENSG00000185291	95.2996	-0.405609	0.139026	-2.9175	0.00352845	0.0352202	ENSG00000185291	IL3RA
ENSG00000132205	2243.52	-0.406628	0.0591989	-6.86884	6.47256e-12	4.77041e-10	ENSG00000132205	EMILIN2
ENSG00000164056	82.0114	-0.408599	0.141013	-2.89761	0.00376019	0.0370015	ENSG00000164056	SPRY1
ENSG00000007944	94.3341	-0.409218	0.141762	-2.88664	0.00389375	0.0379436	ENSG00000007944	MYLIP
ENSG00000183160	6126.01	-0.409541	0.0768377	-5.32996	9.82371e-08	3.41786e-06	ENSG00000183160	TMEM119
ENSG00000138496	1415.91	-0.410658	0.0669758	-6.13143	8.70917e-10	4.53203e-08	ENSG00000138496	PARP9
ENSG00000221955	482.389	-0.410858	0.0788105	-5.21324	1.85572e-07	6.02675e-06	ENSG00000221955	SLC12A8
ENSG00000178078	66.9125	-0.411034	0.147567	-2.78541	0.00534606	0.0480267	ENSG00000178078	STAP2
ENSG00000133466	691.949	-0.411854	0.0702462	-5.86301	4.54552e-09	2.03668e-07	ENSG00000133466	C1QTNF6
ENSG00000186417	95.4121	-0.412108	0.135921	-3.03197	0.00242961	0.0258829	ENSG00000186417	GLDN
ENSG00000102452	219.793	-0.41217	0.112329	-3.66931	0.000243207	0.00372169	ENSG00000102452	NALCN
ENSG00000123243	7361.49	-0.412797	0.070819	-5.8289	5.57942e-09	2.45128e-07	ENSG00000123243	ITIH5
ENSG00000022267	72586.5	-0.413326	0.0382448	-10.8074	3.17669e-27	9.40351e-25	ENSG00000022267	FHL1
ENSG00000175899	573.627	-0.414329	0.105599	-3.92361	8.72335e-05	0.00150303	ENSG00000175899	A2M
ENSG00000175170	10.2799	-0.414966	0.147881	-2.80609	0.00501469	0.0457787	ENSG00000175170	FAM182B
ENSG00000169946	16.5032	-0.414978	0.146695	-2.82884	0.00467166	0.0434128	ENSG00000169946	ZFPM2
ENSG00000154065	771.792	-0.416839	0.0659502	-6.32052	2.60688e-10	1.51358e-08	ENSG00000154065	ANKRD29
ENSG00000151748	2821.11	-0.417542	0.0466314	-8.95411	3.42498e-19	5.37781e-17	ENSG00000151748	SAV1
ENSG00000145423	1126.28	-0.417582	0.087238	-4.78669	1.69551e-06	4.48254e-05	ENSG00000145423	SFRP2
ENSG00000176887	943.757	-0.418341	0.0843488	-4.95965	7.06187e-07	2.03051e-05	ENSG00000176887	SOX11
ENSG00000122176	2836.83	-0.420277	0.0602329	-6.97753	3.00409e-12	2.25082e-10	ENSG00000122176	FMOD
ENSG00000234737	10.9261	-0.420285	0.151577	-2.77275	0.00555846	0.0496385	ENSG00000234737	KRT18P15
ENSG00000130413	196.086	-0.421805	0.103446	-4.07755	4.55118e-05	0.000861433	ENSG00000130413	STK33
ENSG00000215861	215.201	-0.421956	0.102861	-4.10218	4.09284e-05	0.000782058	ENSG00000215861	WI2-1896O14.1
ENSG00000088756	2100.36	-0.422192	0.0633076	-6.6689	2.57722e-11	1.74296e-09	ENSG00000088756	ARHGAP28
ENSG00000198756	287.369	-0.423117	0.103553	-4.08598	4.38916e-05	0.000833387	ENSG00000198756	COLGALT2
ENSG00000119699	304.815	-0.423798	0.0902195	-4.69741	2.63482e-06	6.72941e-05	ENSG00000119699	TGFB3
ENSG00000163947	262.303	-0.424356	0.105959	-4.00492	6.20389e-05	0.00112136	ENSG00000163947	ARHGEF3
ENSG00000258676	9.90422	-0.426613	0.143086	-2.98151	0.00286827	0.0297145	ENSG00000258676	RP11-386M24.3
ENSG00000143416	1110.85	-0.426829	0.0720768	-5.92187	3.18305e-09	1.46998e-07	ENSG00000143416	SELENBP1
ENSG00000163590	80.239	-0.427254	0.148097	-2.88495	0.00391474	0.0380454	ENSG00000163590	PPM1L
ENSG00000245105	13.4817	-0.42748	0.153224	-2.7899	0.00527244	0.0475695	ENSG00000245105	A2M-AS1
ENSG00000170962	594.944	-0.428073	0.105222	-4.0683	4.73581e-05	0.000891785	ENSG00000170962	PDGFD
ENSG00000087301	402.582	-0.428311	0.0881249	-4.86028	1.17222e-06	3.24787e-05	ENSG00000087301	TXNDC16
ENSG00000265579	82.6081	-0.429667	0.14131	-3.0406	0.00236104	0.025223	ENSG00000265579	RP11-713C5.1
ENSG00000137672	373.208	-0.430228	0.0950361	-4.52699	5.98287e-06	0.000141035	ENSG00000137672	TRPC6
ENSG00000196730	3146.69	-0.430472	0.0741625	-5.80444	6.45803e-09	2.79647e-07	ENSG00000196730	DAPK1
ENSG00000162105	679.188	-0.431537	0.0839652	-5.13948	2.75507e-07	8.54782e-06	ENSG00000162105	SHANK2
ENSG00000138411	239.202	-0.43198	0.102274	-4.22375	2.40271e-05	0.00048913	ENSG00000138411	HECW2
ENSG00000144218	2814.42	-0.43426	0.0480378	-9.03996	1.56726e-19	2.57273e-17	ENSG00000144218	AFF3
ENSG00000178538	19.3161	-0.434873	0.143727	-3.02569	0.00248069	0.0263029	ENSG00000178538	CA8
ENSG00000109625	249.521	-0.435	0.101663	-4.27883	1.87876e-05	0.000391083	ENSG00000109625	CPZ
ENSG00000166349	47.3862	-0.436034	0.154058	-2.83032	0.00465013	0.0433116	ENSG00000166349	RAG1
ENSG00000271930	43.1572	-0.436587	0.153831	-2.83809	0.00453841	0.0425517	ENSG00000271930	RP11-44N12.5
ENSG00000170271	890.118	-0.437059	0.0844866	-5.17312	2.30218e-07	7.26757e-06	ENSG00000170271	FAXDC2
ENSG00000228307	10.3742	-0.437547	0.149991	-2.91715	0.00353247	0.0352408	ENSG00000228307	OR2S1P
ENSG00000188488	13.9777	-0.437581	0.149934	-2.91849	0.00351727	0.0351279	ENSG00000188488	SERPINA5
ENSG00000251615	102.386	-0.43793	0.13313	-3.28948	0.00100372	0.0123969	ENSG00000251615	RP11-774O3.3
ENSG00000123405	47.8754	-0.438251	0.151334	-2.89592	0.0037805	0.0371608	ENSG00000123405	NFE2
ENSG00000164694	197.947	-0.438661	0.11273	-3.89125	9.97311e-05	0.00167989	ENSG00000164694	FNDC1
ENSG00000120262	106.143	-0.43867	0.137109	-3.19942	0.00137703	0.0160031	ENSG00000120262	CCDC170
ENSG00000253305	152.382	-0.438869	0.13013	-3.37255	0.000744749	0.00968871	ENSG00000253305	PCDHGB6
ENSG00000151690	1500.18	-0.438885	0.0620448	-7.07368	1.50874e-12	1.16924e-10	ENSG00000151690	MFSD6
ENSG00000204261	34.3662	-0.44024	0.157689	-2.79183	0.00524105	0.0473662	ENSG00000204261	PSMB8-AS1
ENSG00000173706	36718.7	-0.44076	0.04899	-8.99695	2.3207e-19	3.70839e-17	ENSG00000173706	HEG1
ENSG00000113594	1407.07	-0.441108	0.0775924	-5.68494	1.30856e-08	5.43188e-07	ENSG00000113594	LIFR
ENSG00000276603	8.81588	-0.441491	0.139043	-3.17521	0.00149729	0.0171226	ENSG00000276603	RP11-425M5.7
ENSG00000178917	107.534	-0.441696	0.132981	-3.3215	0.000895358	0.0112587	ENSG00000178917	ZNF852
ENSG00000139263	1480.44	-0.4418	0.0821889	-5.37542	7.64055e-08	2.7052e-06	ENSG00000139263	LRIG3
ENSG00000130962	1901.8	-0.441832	0.0573703	-7.70141	1.34577e-14	1.3352e-12	ENSG00000130962	PRRG1
ENSG00000165140	44.7076	-0.442861	0.15367	-2.8819	0.00395291	0.0382107	ENSG00000165140	FBP1
ENSG00000111885	1679.78	-0.443454	0.0991907	-4.47072	7.79558e-06	0.000178183	ENSG00000111885	MAN1A1
ENSG00000145681	21.9293	-0.443758	0.155811	-2.84805	0.0043988	0.0416155	ENSG00000145681	HAPLN1
ENSG00000196639	1421.22	-0.444076	0.0886232	-5.01084	5.41938e-07	1.61215e-05	ENSG00000196639	HRH1
ENSG00000107099	663.633	-0.444679	0.0676486	-6.57336	4.9193e-11	3.18379e-09	ENSG00000107099	DOCK8
ENSG00000151117	83.1095	-0.44584	0.135651	-3.28667	0.00101379	0.01247	ENSG00000151117	TMEM86A
ENSG00000151692	139.552	-0.447506	0.124223	-3.60244	0.000315241	0.00463543	ENSG00000151692	RNF144A
ENSG00000092607	328.619	-0.448683	0.100707	-4.45535	8.37573e-06	0.000189287	ENSG00000092607	TBX15
ENSG00000155269	59.8607	-0.448979	0.14667	-3.06116	0.00220482	0.0238541	ENSG00000155269	GPR78
ENSG00000076770	57.2346	-0.449107	0.148233	-3.02973	0.00244771	0.0260175	ENSG00000076770	MBNL3
ENSG00000162630	310.114	-0.450356	0.126429	-3.56212	0.000367871	0.00527194	ENSG00000162630	B3GALT2
ENSG00000070731	29.6291	-0.451017	0.161326	-2.79569	0.00517888	0.0470634	ENSG00000070731	ST6GALNAC2
ENSG00000159217	1081.79	-0.45111	0.0596043	-7.56842	3.77786e-14	3.64796e-12	ENSG00000159217	IGF2BP1
ENSG00000138185	117.983	-0.45192	0.147355	-3.06689	0.00216299	0.0234577	ENSG00000138185	ENTPD1
ENSG00000273680	30.0755	-0.452132	0.159724	-2.8307	0.0046446	0.0432977	ENSG00000273680	RP11-996F15.6
ENSG00000118515	6458.65	-0.45241	0.0704961	-6.41751	1.38517e-10	8.49629e-09	ENSG00000118515	SGK1
ENSG00000168234	2536.03	-0.452958	0.0636802	-7.11302	1.13531e-12	9.03099e-11	ENSG00000168234	TTC39C
ENSG00000175946	13.3128	-0.453034	0.153932	-2.94308	0.00324965	0.0328733	ENSG00000175946	KLHL38
ENSG00000148842	425.814	-0.45356	0.0874427	-5.18694	2.13772e-07	6.80165e-06	ENSG00000148842	CNNM2
ENSG00000254602	108.328	-0.453714	0.124825	-3.6348	0.000278196	0.00419352	ENSG00000254602	AP000662.4
ENSG00000187699	54.3346	-0.453715	0.150036	-3.02404	0.00249423	0.0264309	ENSG00000187699	C2orf88
ENSG00000164292	29330.8	-0.454697	0.0380373	-11.954	6.18954e-33	2.28091e-30	ENSG00000164292	RHOBTB3
ENSG00000185432	102.791	-0.454872	0.137303	-3.31289	0.000923359	0.0115385	ENSG00000185432	METTL7A
ENSG00000087303	8786.28	-0.455611	0.0898302	-5.07191	3.93838e-07	1.19723e-05	ENSG00000087303	NID2
ENSG00000175556	26.7414	-0.455862	0.161326	-2.82571	0.00471754	0.0436621	ENSG00000175556	LONRF3
ENSG00000135540	300.217	-0.456227	0.10983	-4.15392	3.26827e-05	0.000640078	ENSG00000135540	NHSL1
ENSG00000127863	621.967	-0.456874	0.084851	-5.38443	7.26749e-08	2.58835e-06	ENSG00000127863	TNFRSF19
ENSG00000160191	89.1138	-0.457291	0.147987	-3.09008	0.00200101	0.0219783	ENSG00000160191	PDE9A
ENSG00000107104	5753.09	-0.458062	0.0688021	-6.65768	2.78192e-11	1.87389e-09	ENSG00000107104	KANK1
ENSG00000154122	5022.08	-0.4596	0.0462354	-9.94045	2.77577e-23	6.26526e-21	ENSG00000154122	ANKH
ENSG00000225434	5.917	-0.460417	0.112435	-4.09495	4.22263e-05	0.000805154	ENSG00000225434	LINC01504
ENSG00000090339	3726.17	-0.461296	0.0955308	-4.82877	1.37378e-06	3.7191e-05	ENSG00000090339	ICAM1
ENSG00000182175	237.599	-0.461333	0.123925	-3.72268	0.000197118	0.00308437	ENSG00000182175	RGMA
ENSG00000118997	20.6131	-0.462371	0.160047	-2.88897	0.00386502	0.0377043	ENSG00000118997	DNAH7
ENSG00000073464	91.9867	-0.46321	0.135634	-3.41514	0.000637492	0.00850791	ENSG00000073464	CLCN4
ENSG00000185418	680.69	-0.463307	0.100646	-4.60334	4.15775e-06	0.000102564	ENSG00000185418	TARSL2
ENSG00000180592	142.965	-0.46432	0.128858	-3.60335	0.000314143	0.00463437	ENSG00000180592	SKIDA1
ENSG00000148344	818.979	-0.464643	0.112946	-4.11384	3.89136e-05	0.000748309	ENSG00000148344	PTGES
ENSG00000130377	10.7485	-0.465814	0.149227	-3.12151	0.00179929	0.0199561	ENSG00000130377	ACSBG2
ENSG00000186150	21.2777	-0.466988	0.161256	-2.89594	0.00378022	0.0371608	ENSG00000186150	UBL4B
ENSG00000115594	7806.21	-0.468879	0.0789062	-5.94224	2.8116e-09	1.31526e-07	ENSG00000115594	IL1R1
ENSG00000259291	184.909	-0.470022	0.112819	-4.16616	3.09767e-05	0.000611307	ENSG00000259291	RP11-617F23.1
ENSG00000183346	67.1551	-0.470234	0.149933	-3.1363	0.00171092	0.0191058	ENSG00000183346	C10orf107
ENSG00000164125	4645.1	-0.470243	0.0707004	-6.65121	2.90684e-11	1.93686e-09	ENSG00000164125	FAM198B
ENSG00000108950	1484.17	-0.470754	0.0630905	-7.46156	8.55023e-14	7.56821e-12	ENSG00000108950	FAM20A
ENSG00000163251	107.196	-0.472062	0.128231	-3.68135	0.000232	0.00357747	ENSG00000163251	FZD5
ENSG00000144401	443.802	-0.472568	0.0954118	-4.95292	7.31066e-07	2.09538e-05	ENSG00000144401	METTL21A
ENSG00000168477	281.171	-0.474439	0.141736	-3.34736	0.000815861	0.0104408	ENSG00000168477	TNXB
ENSG00000136040	1809.39	-0.474573	0.071441	-6.64286	3.07655e-11	2.02749e-09	ENSG00000136040	PLXNC1
ENSG00000235859	47.5729	-0.474781	0.156154	-3.04047	0.00236208	0.025223	ENSG00000235859	AC006978.6
ENSG00000276547	1878.99	-0.475076	0.0764308	-6.21576	5.10773e-10	2.78642e-08	ENSG00000276547	PCDHGB5
ENSG00000101928	1967.45	-0.475094	0.097897	-4.853	1.21607e-06	3.34225e-05	ENSG00000101928	MOSPD1
ENSG00000126016	326.606	-0.475263	0.106302	-4.4709	7.78925e-06	0.000178183	ENSG00000126016	AMOT
ENSG00000147394	512.247	-0.477923	0.0940291	-5.08271	3.72091e-07	1.13494e-05	ENSG00000147394	ZNF185
ENSG00000166831	73.3023	-0.479257	0.148832	-3.22012	0.00128137	0.0152064	ENSG00000166831	RBPMS2
ENSG00000158769	45.1177	-0.480767	0.153934	-3.1232	0.00178894	0.0198787	ENSG00000158769	F11R
ENSG00000076716	420.706	-0.480836	0.0806415	-5.96264	2.48202e-09	1.17632e-07	ENSG00000076716	GPC4
ENSG00000156486	92.2654	-0.481895	0.150364	-3.20487	0.00135125	0.0157943	ENSG00000156486	KCNS2
ENSG00000177875	39.7562	-0.483265	0.157908	-3.06043	0.00221019	0.0238835	ENSG00000177875	CCDC184
ENSG00000111801	410.289	-0.483505	0.0949018	-5.09479	3.49128e-07	1.06851e-05	ENSG00000111801	BTN3A3
ENSG00000221963	1990.06	-0.486099	0.0522372	-9.30562	1.33216e-20	2.38166e-18	ENSG00000221963	APOL6
ENSG00000120837	3713.19	-0.486258	0.0782246	-6.21618	5.09393e-10	2.78642e-08	ENSG00000120837	NFYB
ENSG00000227199	19.0431	-0.486834	0.160173	-3.03942	0.00237031	0.025281	ENSG00000227199	ST7-AS1
ENSG00000125848	721.847	-0.487962	0.108435	-4.50003	6.79446e-06	0.000157494	ENSG00000125848	FLRT3
ENSG00000261888	932.046	-0.489934	0.0719463	-6.80972	9.77906e-12	7.00716e-10	ENSG00000261888	AC144831.1
ENSG00000137573	105949	-0.490951	0.0478549	-10.2592	1.07634e-24	2.62642e-22	ENSG00000137573	SULF1
ENSG00000145283	19.1442	-0.492429	0.156394	-3.14864	0.00164031	0.0184658	ENSG00000145283	SLC10A6
ENSG00000132639	17.4859	-0.493324	0.155683	-3.16877	0.00153085	0.0174401	ENSG00000132639	SNAP25
ENSG00000075651	1006.23	-0.493934	0.0846244	-5.83678	5.32207e-09	2.34965e-07	ENSG00000075651	PLD1
ENSG00000109072	175.791	-0.495243	0.120034	-4.12584	3.6938e-05	0.000716422	ENSG00000109072	VTN
ENSG00000198759	19.7839	-0.495592	0.150522	-3.29248	0.000993081	0.0122907	ENSG00000198759	EGFL6
ENSG00000065675	34.4533	-0.49566	0.161247	-3.07392	0.00211268	0.022995	ENSG00000065675	PRKCQ
ENSG00000183873	85.8441	-0.497624	0.144663	-3.4399	0.000581932	0.00785347	ENSG00000183873	SCN5A
ENSG00000150540	1423.82	-0.498704	0.0961228	-5.18819	2.12346e-07	6.77444e-06	ENSG00000150540	HNMT
ENSG00000134198	273.396	-0.498801	0.12388	-4.0265	5.66133e-05	0.00103889	ENSG00000134198	TSPAN2
ENSG00000112902	12276.3	-0.499152	0.0584508	-8.5397	1.34568e-17	1.88364e-15	ENSG00000112902	SEMA5A
ENSG00000111907	1000.78	-0.499342	0.0869849	-5.74056	9.43628e-09	3.99042e-07	ENSG00000111907	TPD52L1
ENSG00000165959	184.492	-0.499381	0.111787	-4.46726	7.92273e-06	0.000180481	ENSG00000165959	CLMN
ENSG00000179855	17.7026	-0.49994	0.159252	-3.13929	0.00169357	0.0189943	ENSG00000179855	GIPC3
ENSG00000280219	51.3201	-0.501711	0.156137	-3.21328	0.00131229	0.0154472	ENSG00000280219	RP11-752L20.3
ENSG00000079257	1718.61	-0.502578	0.0842311	-5.96665	2.42167e-09	1.15074e-07	ENSG00000079257	LXN
ENSG00000196139	13.3571	-0.502865	0.15133	-3.32296	0.000890665	0.011231	ENSG00000196139	AKR1C3
ENSG00000114796	2046.91	-0.504015	0.0786245	-6.41041	1.4513e-10	8.79398e-09	ENSG00000114796	KLHL24
ENSG00000154930	609.524	-0.505701	0.096612	-5.23435	1.65565e-07	5.46547e-06	ENSG00000154930	ACSS1
ENSG00000073350	28.7035	-0.50624	0.154826	-3.26973	0.00107649	0.013125	ENSG00000073350	LLGL2
ENSG00000131016	22834.9	-0.508098	0.0601866	-8.44204	3.11837e-17	4.14033e-15	ENSG00000131016	AKAP12
ENSG00000250722	68.3824	-0.508216	0.140403	-3.61969	0.000294953	0.00440163	ENSG00000250722	SEPP1
ENSG00000106560	21.8864	-0.510483	0.158264	-3.22551	0.00125749	0.014968	ENSG00000106560	GIMAP2
ENSG00000196932	35.5114	-0.510808	0.161346	-3.16591	0.00154598	0.0176013	ENSG00000196932	TMEM26
ENSG00000135914	55.4582	-0.51363	0.157366	-3.26393	0.0010988	0.013343	ENSG00000135914	HTR2B
ENSG00000052850	2353.04	-0.514245	0.0631976	-8.13709	4.04884e-16	4.65668e-14	ENSG00000052850	ALX4
ENSG00000119514	281.351	-0.514566	0.093538	-5.50114	3.77344e-08	1.42546e-06	ENSG00000119514	GALNT12
ENSG00000120833	1328.85	-0.514911	0.0825637	-6.23653	4.47394e-10	2.49339e-08	ENSG00000120833	SOCS2
ENSG00000260337	17.0335	-0.515133	0.160148	-3.2166	0.0012972	0.0153195	ENSG00000260337	RP11-386M24.6
ENSG00000144485	38.0894	-0.517341	0.16111	-3.2111	0.00132226	0.0155241	ENSG00000144485	HES6
ENSG00000157388	20.3519	-0.518074	0.158269	-3.27338	0.0010627	0.0129832	ENSG00000157388	CACNA1D
ENSG00000180353	213.297	-0.518374	0.106766	-4.85522	1.20252e-06	3.32017e-05	ENSG00000180353	HCLS1
ENSG00000170214	19.5203	-0.519229	0.160173	-3.24168	0.00118827	0.0142474	ENSG00000170214	ADRA1B
ENSG00000170836	1015.76	-0.519492	0.0664135	-7.82208	5.19565e-15	5.423e-13	ENSG00000170836	PPM1D
ENSG00000186496	92.7417	-0.519756	0.15002	-3.46457	0.000531072	0.00725384	ENSG00000186496	ZNF396
ENSG00000144730	963.148	-0.520232	0.0896006	-5.80612	6.39373e-09	2.77528e-07	ENSG00000144730	IL17RD
ENSG00000127561	240.43	-0.520843	0.130599	-3.9881	6.66046e-05	0.00118608	ENSG00000127561	SYNGR3
ENSG00000120162	17.6218	-0.521314	0.156505	-3.33097	0.000865452	0.0109658	ENSG00000120162	MOB3B
ENSG00000081052	768.728	-0.521337	0.0846735	-6.15703	7.41198e-10	3.92487e-08	ENSG00000081052	COL4A4
ENSG00000133083	524.253	-0.522262	0.0897843	-5.81685	5.99655e-09	2.61545e-07	ENSG00000133083	DCLK1
ENSG00000164440	62.3424	-0.522418	0.157088	-3.32564	0.000882154	0.0111392	ENSG00000164440	TXLNB
ENSG00000133321	198.264	-0.524465	0.112832	-4.64818	3.3487e-06	8.39827e-05	ENSG00000133321	RARRES3
ENSG00000137872	296.169	-0.524471	0.100319	-5.22804	1.71319e-07	5.60417e-06	ENSG00000137872	SEMA6D
ENSG00000138193	2247.2	-0.52613	0.0661929	-7.94842	1.889e-15	2.01832e-13	ENSG00000138193	PLCE1
ENSG00000116106	3949.72	-0.527109	0.0747904	-7.04781	1.8175e-12	1.39062e-10	ENSG00000116106	EPHA4
ENSG00000092068	324.736	-0.527278	0.100773	-5.23235	1.67366e-07	5.51484e-06	ENSG00000092068	SLC7A8
ENSG00000163145	12.7819	-0.52754	0.148422	-3.55431	0.000378969	0.00538822	ENSG00000163145	C1QTNF7
ENSG00000227544	9.62315	-0.527919	0.146863	-3.59463	0.000324857	0.00474591	ENSG00000227544	AC018647.3
ENSG00000258673	12.5026	-0.528477	0.145663	-3.62808	0.000285531	0.00427458	ENSG00000258673	LINC01397
ENSG00000157570	115.253	-0.528782	0.1211	-4.36648	1.26265e-05	0.000274696	ENSG00000157570	TSPAN18
ENSG00000103175	745.073	-0.530042	0.110348	-4.80337	1.56016e-06	4.17979e-05	ENSG00000103175	WFDC1
ENSG00000091831	164.072	-0.530681	0.117808	-4.50461	6.64947e-06	0.000154774	ENSG00000091831	ESR1
ENSG00000173083	329.475	-0.531169	0.08571	-6.19729	5.74449e-10	3.11497e-08	ENSG00000173083	HPSE
ENSG00000148175	14993.3	-0.532505	0.0448601	-11.8704	1.68739e-32	6.09382e-30	ENSG00000148175	STOM
ENSG00000038427	401.994	-0.534367	0.0855389	-6.24706	4.18252e-10	2.34546e-08	ENSG00000038427	VCAN
ENSG00000103888	89636.9	-0.535434	0.063738	-8.40055	4.44409e-17	5.73192e-15	ENSG00000103888	CEMIP
ENSG00000219891	79.8212	-0.537179	0.137418	-3.90909	9.26461e-05	0.0015827	ENSG00000219891	ZSCAN12P1
ENSG00000169184	541.944	-0.538814	0.1051	-5.12665	2.94937e-07	9.10371e-06	ENSG00000169184	MN1
ENSG00000197479	58.1768	-0.538868	0.154709	-3.48311	0.000495619	0.00681081	ENSG00000197479	PCDHB11
ENSG00000169026	52.7167	-0.54017	0.155142	-3.48177	0.000498108	0.00683979	ENSG00000169026	MFSD7
ENSG00000138759	7053.24	-0.540815	0.0828097	-6.53082	6.54101e-11	4.15884e-09	ENSG00000138759	FRAS1
ENSG00000146021	336.108	-0.541042	0.103715	-5.21663	1.8221e-07	5.92823e-06	ENSG00000146021	KLHL3
ENSG00000182674	19.3068	-0.541194	0.160256	-3.37705	0.000732666	0.00956598	ENSG00000182674	KCNB2
ENSG00000206337	40.3847	-0.541603	0.156839	-3.45324	0.0005539	0.00753713	ENSG00000206337	HCP5
ENSG00000009950	17.758	-0.543275	0.147028	-3.69504	0.000219851	0.00340467	ENSG00000009950	MLXIPL
ENSG00000134326	68.3737	-0.54389	0.144118	-3.77392	0.000160703	0.00257481	ENSG00000134326	CMPK2
ENSG00000134539	59.652	-0.544372	0.149577	-3.63941	0.000273261	0.00412909	ENSG00000134539	KLRD1
ENSG00000081320	2276.88	-0.545515	0.0885374	-6.16141	7.20992e-10	3.8404e-08	ENSG00000081320	STK17B
ENSG00000119138	5456.47	-0.54716	0.0518485	-10.553	4.91789e-26	1.34549e-23	ENSG00000119138	KLF9
ENSG00000174697	77.2062	-0.548016	0.152528	-3.59289	0.000327032	0.0047705	ENSG00000174697	LEP
ENSG00000119283	16.5397	-0.548187	0.152061	-3.60504	0.000312107	0.00461188	ENSG00000119283	TRIM67
ENSG00000065320	44.3359	-0.548287	0.160993	-3.40565	0.000660061	0.00876376	ENSG00000065320	NTN1
ENSG00000010030	80.8735	-0.548545	0.145757	-3.76341	0.000167614	0.00267605	ENSG00000010030	ETV7
ENSG00000128284	256.217	-0.549585	0.117645	-4.67154	2.98949e-06	7.58163e-05	ENSG00000128284	APOL3
ENSG00000134201	68.7305	-0.551319	0.141373	-3.89975	9.62912e-05	0.00162802	ENSG00000134201	GSTM5
ENSG00000115380	60576.1	-0.552467	0.0527374	-10.4758	1.11574e-25	2.87812e-23	ENSG00000115380	EFEMP1
ENSG00000261087	36.6746	-0.552585	0.15702	-3.5192	0.000432857	0.00604027	ENSG00000261087	KB-1460A1.5
ENSG00000131831	12.7918	-0.552607	0.150501	-3.6718	0.000240851	0.00368876	ENSG00000131831	RAI2
ENSG00000143028	3784.05	-0.553734	0.066818	-8.2872	1.15945e-16	1.44388e-14	ENSG00000143028	SYPL2
ENSG00000106538	1066.88	-0.555378	0.102832	-5.40085	6.63272e-08	2.39056e-06	ENSG00000106538	RARRES2
ENSG00000148798	351.041	-0.556237	0.09833	-5.65683	1.5419e-08	6.29912e-07	ENSG00000148798	INA
ENSG00000064042	4182.17	-0.556286	0.0652631	-8.52374	1.54487e-17	2.12945e-15	ENSG00000064042	LIMCH1
ENSG00000111057	2151.3	-0.556396	0.0980018	-5.6774	1.36754e-08	5.65073e-07	ENSG00000111057	KRT18
ENSG00000118898	1098.4	-0.556423	0.0788932	-7.05286	1.75283e-12	1.34685e-10	ENSG00000118898	PPL
ENSG00000054598	2061.62	-0.558096	0.051238	-10.8922	1.25517e-27	3.77744e-25	ENSG00000054598	FOXC1
ENSG00000161267	106.157	-0.558378	0.127538	-4.37813	1.19705e-05	0.000261684	ENSG00000161267	BDH1
ENSG00000106123	2179.71	-0.559993	0.106025	-5.28172	1.27977e-07	4.30331e-06	ENSG00000106123	EPHB6
ENSG00000124749	78.3191	-0.560891	0.158386	-3.5413	0.000398159	0.00563445	ENSG00000124749	COL21A1
ENSG00000184347	7117.3	-0.562453	0.0917915	-6.12751	8.92638e-10	4.61844e-08	ENSG00000184347	SLIT3
ENSG00000165895	201.738	-0.56952	0.101832	-5.59273	2.23522e-08	8.79331e-07	ENSG00000165895	ARHGAP42
ENSG00000005249	391.087	-0.569757	0.108147	-5.26837	1.37642e-07	4.58562e-06	ENSG00000005249	PRKAR2B
ENSG00000152580	22.8294	-0.570041	0.159278	-3.57891	0.000345031	0.00498817	ENSG00000152580	IGSF10
ENSG00000091972	41.0191	-0.571905	0.158198	-3.61512	0.000300207	0.00446528	ENSG00000091972	CD200
ENSG00000150667	65.6077	-0.575036	0.145577	-3.95005	7.8135e-05	0.00136317	ENSG00000150667	FSIP1
ENSG00000184254	186.972	-0.576769	0.132452	-4.35456	1.33335e-05	0.000287994	ENSG00000184254	ALDH1A3
ENSG00000107968	638.689	-0.577092	0.070034	-8.24017	1.71964e-16	2.12682e-14	ENSG00000107968	MAP3K8
ENSG00000108947	483.068	-0.577327	0.0854153	-6.75905	1.38895e-11	9.72101e-10	ENSG00000108947	EFNB3
ENSG00000107796	4995.44	-0.5781	0.0873024	-6.62182	3.54812e-11	2.32132e-09	ENSG00000107796	ACTA2
ENSG00000160963	103.165	-0.578646	0.146981	-3.93689	8.25448e-05	0.00143456	ENSG00000160963	COL26A1
ENSG00000169242	62.4117	-0.581344	0.153932	-3.77662	0.000158973	0.0025539	ENSG00000169242	EFNA1
ENSG00000111452	9238.54	-0.581813	0.0774126	-7.51573	5.65931e-14	5.18732e-12	ENSG00000111452	ADGRD1
ENSG00000226900	17.9565	-0.582004	0.153205	-3.79886	0.000145361	0.00235617	ENSG00000226900	RP11-432J24.5
ENSG00000081818	32.4621	-0.582143	0.15905	-3.66013	0.000252084	0.00383801	ENSG00000081818	PCDHB4
ENSG00000129757	289.7	-0.582671	0.10719	-5.43586	5.45338e-08	1.99335e-06	ENSG00000129757	CDKN1C
ENSG00000215089	39.3849	-0.585216	0.158532	-3.69146	0.000222973	0.00344705	ENSG00000215089	KRT18P11
ENSG00000204314	71.1716	-0.586703	0.148739	-3.94451	7.99626e-05	0.00139103	ENSG00000204314	PRRT1
ENSG00000189362	378.6	-0.58742	0.0948978	-6.19003	6.01528e-10	3.25203e-08	ENSG00000189362	NEMP2
ENSG00000185442	1587.18	-0.588341	0.0717779	-8.19669	2.47097e-16	2.95486e-14	ENSG00000185442	FAM174B
ENSG00000164920	4656.24	-0.58893	0.0780516	-7.5454	4.50917e-14	4.19701e-12	ENSG00000164920	OSR2
ENSG00000148082	154.016	-0.589518	0.122296	-4.82042	1.43253e-06	3.86654e-05	ENSG00000148082	SHC3
ENSG00000187764	302.113	-0.589792	0.0919936	-6.41123	1.44351e-10	8.77624e-09	ENSG00000187764	SEMA4D
ENSG00000009413	8050.82	-0.590226	0.0970735	-6.0802	1.20033e-09	6.004e-08	ENSG00000009413	REV3L
ENSG00000188613	229.903	-0.590947	0.114443	-5.16366	2.42167e-07	7.59168e-06	ENSG00000188613	NANOS1
ENSG00000144229	50.7641	-0.592276	0.150143	-3.94474	7.98855e-05	0.00139103	ENSG00000144229	THSD7B
ENSG00000230018	11.4449	-0.593019	0.140799	-4.21182	2.53323e-05	0.000511661	ENSG00000230018	RP11-481H12.1
ENSG00000134343	137.004	-0.593303	0.141715	-4.18658	2.83186e-05	0.000565652	ENSG00000134343	ANO3
ENSG00000099953	274.13	-0.593574	0.121842	-4.87166	1.10666e-06	3.07905e-05	ENSG00000099953	MMP11
ENSG00000186487	7.90688	-0.59464	0.132536	-4.48663	7.23586e-06	0.000167066	ENSG00000186487	MYT1L
ENSG00000172594	673.61	-0.59553	0.103892	-5.73221	9.91322e-09	4.17257e-07	ENSG00000172594	SMPDL3A
ENSG00000246985	176.717	-0.595654	0.113663	-5.24053	1.60116e-07	5.29528e-06	ENSG00000246985	SOCS2-AS1
ENSG00000163884	19.9205	-0.602314	0.148594	-4.05343	5.04724e-05	0.000940536	ENSG00000163884	KLF15
ENSG00000111981	611.705	-0.603296	0.0810615	-7.44245	9.88385e-14	8.62187e-12	ENSG00000111981	ULBP1
ENSG00000005471	62.1659	-0.604642	0.151111	-4.0013	6.29961e-05	0.00113525	ENSG00000005471	ABCB4
ENSG00000138792	127.631	-0.605415	0.143847	-4.20874	2.56796e-05	0.000518096	ENSG00000138792	ENPEP
ENSG00000125378	1316.49	-0.608066	0.0816148	-7.45044	9.30286e-14	8.19423e-12	ENSG00000125378	BMP4
ENSG00000204397	33.4765	-0.609698	0.159132	-3.8314	0.000127415	0.00209539	ENSG00000204397	CARD16
ENSG00000172348	703.957	-0.611464	0.0764381	-7.99947	1.2496e-15	1.35928e-13	ENSG00000172348	RCAN2
ENSG00000065717	137.272	-0.612155	0.148778	-4.11454	3.87951e-05	0.000746826	ENSG00000065717	TLE2
ENSG00000104415	99.7404	-0.612675	0.133726	-4.58156	4.61509e-06	0.000112311	ENSG00000104415	WISP1
ENSG00000008311	482.627	-0.613999	0.0833969	-7.36237	1.80672e-13	1.56096e-11	ENSG00000008311	AASS
ENSG00000115468	2570.11	-0.614255	0.0724907	-8.47356	2.3801e-17	3.20727e-15	ENSG00000115468	EFHD1
ENSG00000170775	9.51157	-0.615877	0.145962	-4.21943	2.44919e-05	0.000496354	ENSG00000170775	GPR37
ENSG00000054654	567.201	-0.618116	0.0793902	-7.7858	6.92739e-15	7.06711e-13	ENSG00000054654	SYNE2
ENSG00000204624	13.4616	-0.620082	0.150629	-4.11663	3.84458e-05	0.000741065	ENSG00000204624	DISP3
ENSG00000168916	443.781	-0.621618	0.085878	-7.23838	4.5406e-13	3.77832e-11	ENSG00000168916	ZNF608
ENSG00000139597	51.7802	-0.622547	0.150156	-4.14599	3.38347e-05	0.00066049	ENSG00000139597	N4BP2L1
ENSG00000017427	57.8091	-0.623703	0.154808	-4.02889	5.60409e-05	0.0010295	ENSG00000017427	IGF1
ENSG00000095637	20.7735	-0.624848	0.15993	-3.90701	9.34446e-05	0.00159483	ENSG00000095637	SORBS1
ENSG00000101384	975.317	-0.624899	0.0708783	-8.8165	1.1809e-18	1.74783e-16	ENSG00000101384	JAG1
ENSG00000164764	986.89	-0.624971	0.0775725	-8.05661	7.84392e-16	8.68943e-14	ENSG00000164764	SBSPON
ENSG00000121552	14.6868	-0.628008	0.155012	-4.05135	5.09236e-05	0.00094699	ENSG00000121552	CSTA
ENSG00000197381	3239.5	-0.628059	0.0630594	-9.95979	2.28538e-23	5.22368e-21	ENSG00000197381	ADARB1
ENSG00000253958	81.398	-0.63019	0.14039	-4.48886	7.16042e-06	0.000165551	ENSG00000253958	CLDN23
ENSG00000143341	86.3573	-0.63038	0.137738	-4.57667	4.72437e-06	0.000114507	ENSG00000143341	HMCN1
ENSG00000165521	131.446	-0.633802	0.130164	-4.86924	1.12026e-06	3.11209e-05	ENSG00000165521	EML5
ENSG00000169271	354.815	-0.633971	0.105768	-5.994	2.04744e-09	9.85883e-08	ENSG00000169271	HSPB3
ENSG00000242600	166.661	-0.634291	0.120011	-5.28529	1.25508e-07	4.23608e-06	ENSG00000242600	MBL1P
ENSG00000180806	45.4088	-0.634786	0.157987	-4.01797	5.87018e-05	0.00106745	ENSG00000180806	HOXC9
ENSG00000176907	2950.54	-0.63853	0.0914787	-6.9801	2.94975e-12	2.21931e-10	ENSG00000176907	C8orf4
ENSG00000172548	123.682	-0.642993	0.125197	-5.13587	2.80849e-07	8.6986e-06	ENSG00000172548	NIPAL4
ENSG00000221866	119.783	-0.643976	0.143551	-4.48606	7.25523e-06	0.000167102	ENSG00000221866	PLXNA4
ENSG00000198624	196.258	-0.644026	0.111676	-5.76694	8.07251e-09	3.43786e-07	ENSG00000198624	CCDC69
ENSG00000052126	2100.93	-0.644102	0.0825494	-7.80263	6.06297e-15	6.25594e-13	ENSG00000052126	PLEKHA5
ENSG00000173599	746.637	-0.649494	0.0948784	-6.84555	7.61844e-12	5.54702e-10	ENSG00000173599	PC
ENSG00000172460	21.2218	-0.649526	0.160587	-4.04471	5.23883e-05	0.000970232	ENSG00000172460	PRSS30P
ENSG00000181072	149.217	-0.652187	0.12165	-5.36117	8.26828e-08	2.88782e-06	ENSG00000181072	CHRM2
ENSG00000205517	100.881	-0.653865	0.14611	-4.47515	7.63578e-06	0.000175419	ENSG00000205517	RGL3
ENSG00000084674	85.9484	-0.656868	0.139917	-4.69471	2.66989e-06	6.80934e-05	ENSG00000084674	APOB
ENSG00000075461	15.0576	-0.656984	0.156386	-4.20103	2.65699e-05	0.000533674	ENSG00000075461	CACNG4
ENSG00000167642	343.859	-0.657204	0.0979669	-6.70844	1.96721e-11	1.34553e-09	ENSG00000167642	SPINT2
ENSG00000132470	439.895	-0.659178	0.124769	-5.28319	1.26955e-07	4.27691e-06	ENSG00000132470	ITGB4
ENSG00000272341	226.163	-0.661482	0.124624	-5.30784	1.10935e-07	3.80104e-06	ENSG00000272341	RP1-151F17.2
ENSG00000254337	25.7209	-0.661517	0.157958	-4.18793	2.81505e-05	0.000562917	ENSG00000254337	RP11-865I6.2
ENSG00000155011	30.6154	-0.662432	0.160642	-4.12365	3.72911e-05	0.000720947	ENSG00000155011	DKK2
ENSG00000188372	30.3144	-0.671551	0.161221	-4.1654	3.10809e-05	0.000612025	ENSG00000188372	ZP3
ENSG00000141574	1425.5	-0.672375	0.126976	-5.29527	1.18838e-07	4.0488e-06	ENSG00000141574	SECTM1
ENSG00000198929	74.9644	-0.674233	0.148219	-4.5489	5.39271e-06	0.00012812	ENSG00000198929	NOS1AP
ENSG00000077157	2031.25	-0.674806	0.0680201	-9.92069	3.38406e-23	7.54394e-21	ENSG00000077157	PPP1R12B
ENSG00000163864	83.9371	-0.678854	0.145362	-4.6701	3.0105e-06	7.6242e-05	ENSG00000163864	NMNAT3
ENSG00000141404	81.1426	-0.682124	0.142382	-4.79081	1.66112e-06	4.39808e-05	ENSG00000141404	GNAL
ENSG00000185015	91.2927	-0.682142	0.128903	-5.29192	1.2104e-07	4.11605e-06	ENSG00000185015	CA13
ENSG00000167191	136.2	-0.683788	0.142522	-4.79777	1.60443e-06	4.27303e-05	ENSG00000167191	GPRC5B
ENSG00000112559	33.3133	-0.686518	0.160607	-4.27453	1.9154e-05	0.000397545	ENSG00000112559	MDFI
ENSG00000134853	7829.56	-0.688183	0.0756097	-9.10177	8.88692e-20	1.48584e-17	ENSG00000134853	PDGFRA
ENSG00000122378	478.326	-0.689765	0.0848458	-8.12963	4.30619e-16	4.92132e-14	ENSG00000122378	FAM213A
ENSG00000167281	16.2675	-0.691922	0.150442	-4.59927	4.23982e-06	0.000104161	ENSG00000167281	RBFOX3
ENSG00000170412	71.5373	-0.692563	0.159813	-4.33359	1.46695e-05	0.000313475	ENSG00000170412	GPRC5C
ENSG00000143772	1553.22	-0.693268	0.0766021	-9.05024	1.42654e-19	2.36321e-17	ENSG00000143772	ITPKB
ENSG00000251151	14.0827	-0.696296	0.154456	-4.50805	6.54273e-06	0.000152836	ENSG00000251151	HOXC-AS3
ENSG00000154479	28.3278	-0.699175	0.16133	-4.33383	1.46538e-05	0.000313475	ENSG00000154479	CCDC173
ENSG00000118849	486.052	-0.699628	0.0750381	-9.32364	1.12419e-20	2.02994e-18	ENSG00000118849	RARRES1
ENSG00000120278	141.66	-0.700901	0.128811	-5.44133	5.28845e-08	1.94093e-06	ENSG00000120278	PLEKHG1
ENSG00000158270	40248.7	-0.70726	0.0514511	-13.7463	5.36214e-43	3.12336e-40	ENSG00000158270	COLEC12
ENSG00000183098	4577.92	-0.710287	0.0649135	-10.942	7.25413e-28	2.25841e-25	ENSG00000183098	GPC6
ENSG00000076258	686.96	-0.713056	0.0818557	-8.71113	3.00865e-18	4.34618e-16	ENSG00000076258	FMO4
ENSG00000131389	5131.16	-0.719568	0.0877963	-8.19588	2.48773e-16	2.95533e-14	ENSG00000131389	SLC6A6
ENSG00000053747	6188.17	-0.722314	0.0690828	-10.4558	1.37857e-25	3.50603e-23	ENSG00000053747	LAMA3
ENSG00000102854	30.8332	-0.72716	0.154673	-4.70128	2.58536e-06	6.61244e-05	ENSG00000102854	MSLN
ENSG00000115457	6975.97	-0.730494	0.105543	-6.92132	4.47458e-12	3.325e-10	ENSG00000115457	IGFBP2
ENSG00000136404	33.1616	-0.733257	0.160572	-4.56653	4.95864e-06	0.000119225	ENSG00000136404	TM6SF1
ENSG00000164684	71.2425	-0.738319	0.15514	-4.75905	1.94502e-06	5.11227e-05	ENSG00000164684	ZNF704
ENSG00000170542	570.758	-0.74692	0.0835221	-8.94278	3.79499e-19	5.90742e-17	ENSG00000170542	SERPINB9
ENSG00000117643	286.56	-0.752314	0.110038	-6.83688	8.09338e-12	5.84569e-10	ENSG00000117643	MAN1C1
ENSG00000103485	324.545	-0.755201	0.104537	-7.22427	5.03784e-13	4.09767e-11	ENSG00000103485	QPRT
ENSG00000118194	61.1546	-0.759161	0.149866	-5.0656	4.07106e-07	1.23341e-05	ENSG00000118194	TNNT2
ENSG00000173227	29.3934	-0.76155	0.1612	-4.72425	2.30968e-06	5.98363e-05	ENSG00000173227	SYT12
ENSG00000007933	48.7727	-0.761702	0.154252	-4.93805	7.89093e-07	2.23333e-05	ENSG00000007933	FMO3
ENSG00000213626	2069.47	-0.770305	0.0913725	-8.43038	3.44545e-17	4.5083e-15	ENSG00000213626	LBH
ENSG00000154556	249.915	-0.773025	0.11258	-6.86642	6.58314e-12	4.83218e-10	ENSG00000154556	SORBS2
ENSG00000106484	4097.39	-0.773272	0.0857379	-9.01902	1.89772e-19	3.05956e-17	ENSG00000106484	MEST
ENSG00000099869	25.3612	-0.773919	0.160957	-4.80823	1.52275e-06	4.08563e-05	ENSG00000099869	IGF2-AS
ENSG00000138379	68.4022	-0.776476	0.147638	-5.25931	1.446e-07	4.80856e-06	ENSG00000138379	MSTN
ENSG00000116574	427.045	-0.777266	0.132516	-5.86547	4.47875e-09	2.01678e-07	ENSG00000116574	RHOU
ENSG00000140511	583.911	-0.779905	0.126312	-6.17443	6.64046e-10	3.56866e-08	ENSG00000140511	HAPLN3
ENSG00000154864	1568.81	-0.782248	0.0800687	-9.76971	1.5189e-22	3.22667e-20	ENSG00000154864	PIEZO2
ENSG00000153094	258.888	-0.78625	0.105012	-7.48724	7.03344e-14	6.35014e-12	ENSG00000153094	BCL2L11
ENSG00000118257	1348.36	-0.787055	0.0830779	-9.4737	2.70097e-21	5.30124e-19	ENSG00000118257	NRP2
ENSG00000106714	41.9613	-0.7916	0.159118	-4.97491	6.52768e-07	1.89198e-05	ENSG00000106714	CNTNAP3
ENSG00000144355	13.833	-0.795716	0.154342	-5.15552	2.52924e-07	7.90148e-06	ENSG00000144355	DLX1
ENSG00000180818	107.414	-0.796225	0.144036	-5.52797	3.23959e-08	1.24462e-06	ENSG00000180818	HOXC10
ENSG00000151617	491.116	-0.797866	0.0883522	-9.03052	1.7086e-19	2.77948e-17	ENSG00000151617	EDNRA
ENSG00000213160	467.153	-0.802539	0.097876	-8.19955	2.4129e-16	2.90465e-14	ENSG00000213160	KLHL23
ENSG00000138735	6491.38	-0.802726	0.0580334	-13.8321	1.63074e-43	1.05165e-40	ENSG00000138735	PDE5A
ENSG00000061918	152.805	-0.807044	0.140931	-5.72651	1.02518e-08	4.30173e-07	ENSG00000061918	GUCY1B3
ENSG00000176928	1268	-0.807216	0.0665795	-12.1241	7.8734e-34	3.15933e-31	ENSG00000176928	GCNT4
ENSG00000239887	185.581	-0.812843	0.132961	-6.11339	9.75365e-10	5.01771e-08	ENSG00000239887	C1orf226
ENSG00000197971	215.377	-0.822901	0.100468	-8.19067	2.59777e-16	3.06587e-14	ENSG00000197971	MBP
ENSG00000122035	395.462	-0.823031	0.113805	-7.23197	4.7604e-13	3.92505e-11	ENSG00000122035	RASL11A
ENSG00000109819	149.338	-0.828999	0.143372	-5.78217	7.3743e-09	3.17042e-07	ENSG00000109819	PPARGC1A
ENSG00000035664	1014.14	-0.829193	0.0745345	-11.125	9.48459e-29	3.05827e-26	ENSG00000035664	DAPK2
ENSG00000099994	162.058	-0.830442	0.134956	-6.15342	7.58307e-10	3.99205e-08	ENSG00000099994	SUSD2
ENSG00000125355	110.77	-0.830743	0.13703	-6.06248	1.34039e-09	6.63109e-08	ENSG00000125355	TMEM255A
ENSG00000101955	3096.87	-0.830966	0.0683694	-12.1541	5.45874e-34	2.24019e-31	ENSG00000101955	SRPX
ENSG00000120899	1714.47	-0.831199	0.0788031	-10.5478	5.20036e-26	1.40154e-23	ENSG00000120899	PTK2B
ENSG00000115252	79.6774	-0.831697	0.146651	-5.67125	1.41756e-08	5.84403e-07	ENSG00000115252	PDE1A
ENSG00000119508	292.573	-0.837797	0.0998593	-8.38977	4.87075e-17	6.19375e-15	ENSG00000119508	NR4A3
ENSG00000042062	107.512	-0.841768	0.153162	-5.49592	3.88674e-08	1.4652e-06	ENSG00000042062	FAM65C
ENSG00000164116	29.3291	-0.842964	0.161138	-5.23132	1.68305e-07	5.5256e-06	ENSG00000164116	GUCY1A3
ENSG00000151952	77.9633	-0.852099	0.158669	-5.37028	7.86139e-08	2.76712e-06	ENSG00000151952	TMEM132D
ENSG00000258498	166.655	-0.85736	0.127234	-6.73844	1.60094e-11	1.10759e-09	ENSG00000258498	DIO3OS
ENSG00000116741	381.898	-0.860002	0.140017	-6.14214	8.14147e-10	4.26118e-08	ENSG00000116741	RGS2
ENSG00000157404	1020.9	-0.86352	0.0791182	-10.9143	9.84801e-28	3.01399e-25	ENSG00000157404	KIT
ENSG00000164176	98.4044	-0.864025	0.135855	-6.35989	2.01903e-10	1.20322e-08	ENSG00000164176	EDIL3
ENSG00000198947	88.3544	-0.868309	0.148907	-5.83123	5.50189e-09	2.42311e-07	ENSG00000198947	DMD
ENSG00000204518	21.7827	-0.872554	0.159124	-5.48348	4.17048e-08	1.55271e-06	ENSG00000204518	AADACL4
ENSG00000123388	92.161	-0.873052	0.150333	-5.80746	6.34286e-09	2.75983e-07	ENSG00000123388	HOXC11
ENSG00000150510	63.2793	-0.875148	0.147778	-5.92206	3.17925e-09	1.46998e-07	ENSG00000150510	FAM124A
ENSG00000162496	10452.6	-0.877968	0.0931422	-9.42611	4.2557e-21	8.17502e-19	ENSG00000162496	DHRS3
ENSG00000175538	88.3443	-0.878427	0.14251	-6.16396	7.09498e-10	3.79036e-08	ENSG00000175538	KCNE3
ENSG00000083067	172.121	-0.878777	0.140423	-6.25806	3.89786e-10	2.19949e-08	ENSG00000083067	TRPM3
ENSG00000094963	30.0593	-0.879235	0.160419	-5.48086	4.23275e-08	1.57265e-06	ENSG00000094963	FMO2
ENSG00000268894	56.9908	-0.882448	0.15082	-5.851	4.88614e-09	2.17313e-07	ENSG00000268894	PLCE1-AS1
ENSG00000162493	1415	-0.885773	0.0680975	-13.0074	1.11004e-38	5.27473e-36	ENSG00000162493	PDPN
ENSG00000124212	10324.3	-0.889246	0.0671815	-13.2365	5.40299e-40	2.71005e-37	ENSG00000124212	PTGIS
ENSG00000053328	38.6462	-0.891469	0.158024	-5.64136	1.68714e-08	6.80015e-07	ENSG00000053328	METTL24
ENSG00000155511	2814.16	-0.892331	0.0678827	-13.1452	1.8134e-39	8.84986e-37	ENSG00000155511	GRIA1
ENSG00000137727	390.707	-0.893141	0.123526	-7.23039	4.81609e-13	3.95291e-11	ENSG00000137727	ARHGAP20
ENSG00000104332	5854.74	-0.901857	0.0580147	-15.5453	1.71213e-54	2.06106e-51	ENSG00000104332	SFRP1
ENSG00000228630	235.404	-0.903605	0.114118	-7.91819	2.4099e-15	2.55974e-13	ENSG00000228630	HOTAIR
ENSG00000068831	75.1715	-0.903982	0.148908	-6.07074	1.27325e-09	6.33362e-08	ENSG00000068831	RASGRP2
ENSG00000235750	345.684	-0.909954	0.0987006	-9.21933	2.98961e-20	5.24111e-18	ENSG00000235750	KIAA0040
ENSG00000105989	4961.46	-0.910873	0.0571549	-15.9369	3.51204e-57	5.28474e-54	ENSG00000105989	WNT2
ENSG00000158473	128.806	-0.912185	0.128762	-7.08429	1.39758e-12	1.09247e-10	ENSG00000158473	CD1D
ENSG00000131979	170.818	-0.915713	0.127075	-7.20609	5.75826e-13	4.66264e-11	ENSG00000131979	GCH1
ENSG00000179256	78.0659	-0.921105	0.149759	-6.1506	7.71914e-10	4.05187e-08	ENSG00000179256	SMCO3
ENSG00000196562	8999.17	-0.923997	0.0634546	-14.5615	4.93291e-48	4.2416e-45	ENSG00000196562	SULF2
ENSG00000139132	1046.53	-0.928041	0.0647723	-14.3278	1.46797e-46	1.06029e-43	ENSG00000139132	FGD4
ENSG00000145819	1969.28	-0.944498	0.0631978	-14.9451	1.67613e-50	1.78035e-47	ENSG00000145819	ARHGAP26
ENSG00000272482	160.309	-0.949251	0.130522	-7.27272	3.52312e-13	2.97275e-11	ENSG00000272482	RP11-474O21.5
ENSG00000203685	29.8664	-0.95105	0.161326	-5.89522	3.74183e-09	1.70192e-07	ENSG00000203685	STUM
ENSG00000146411	473.803	-0.952022	0.0885073	-10.7564	5.52695e-27	1.60968e-24	ENSG00000146411	SLC2A12
ENSG00000169174	110.831	-0.952467	0.139313	-6.83689	8.09308e-12	5.84569e-10	ENSG00000169174	PCSK9
ENSG00000170577	89.5901	-0.963529	0.159182	-6.05299	1.42186e-09	6.97677e-08	ENSG00000170577	SIX2
ENSG00000138061	2816.06	-0.97136	0.0908005	-10.6977	1.04291e-26	2.98918e-24	ENSG00000138061	CYP1B1
ENSG00000106511	36.5304	-0.982898	0.161309	-6.09325	1.10639e-09	5.62764e-08	ENSG00000106511	MEOX2
ENSG00000189221	51.5501	-0.983867	0.155583	-6.32374	2.55303e-10	1.4871e-08	ENSG00000189221	MAOA
ENSG00000116991	565.001	-0.990722	0.0764219	-12.9639	1.96133e-38	9.08095e-36	ENSG00000116991	SIPA1L2
ENSG00000170891	26.1687	-1.0017	0.161033	-6.22047	4.95653e-10	2.72866e-08	ENSG00000170891	CYTL1
ENSG00000167244	10998.1	-1.01621	0.0756681	-13.4298	4.0464e-41	2.28331e-38	ENSG00000167244	IGF2
ENSG00000113361	1513.76	-1.02362	0.0708285	-14.4521	2.43281e-47	1.90997e-44	ENSG00000113361	CDH6
ENSG00000171189	47.42	-1.02662	0.159709	-6.42806	1.29245e-10	7.98682e-09	ENSG00000171189	GRIK1
ENSG00000186479	94.249	-1.04335	0.138153	-7.55217	4.2807e-14	4.04694e-12	ENSG00000186479	RGS7BP
ENSG00000104081	395.263	-1.04384	0.121402	-8.59816	8.10067e-18	1.15176e-15	ENSG00000104081	BMF
ENSG00000003989	70.6671	-1.04714	0.154127	-6.79405	1.0903e-11	7.75101e-10	ENSG00000003989	SLC7A2
ENSG00000100342	203.307	-1.07195	0.117465	-9.12567	7.12932e-20	1.20312e-17	ENSG00000100342	APOL1
[truncated: 26 more rows]

## Sheet: 1c Overlap_with_DNA_repair_gene
		Up regulated DNA repair Genes
Ensemble Gene ID	Name	log2 fold expression
ENSG00000143476	DTL	0.770398
ENSG00000149948	HMGA2	0.753751
ENSG00000131153	GINS2	0.706549
ENSG00000051341	POLQ	0.66568
ENSG00000093009	CDC45	0.631719
ENSG00000276043	UHRF1	0.60849
ENSG00000071539	TRIP13	0.588762
ENSG00000105486	LIG1	0.559078
ENSG00000085999	RAD54L	0.531485
ENSG00000174371	EXO1	0.526238
ENSG00000146670	CDCA5	0.517899
ENSG00000164611	PTTG1	0.505699
ENSG00000104889	RNASEH2A	0.499018
ENSG00000187608	ISG15	0.498023
ENSG00000187741	FANCA	0.489195
ENSG00000171320	ESCO2	0.470147
ENSG00000166803	KIAA0101	0.465016
ENSG00000197299	BLM	0.429904
ENSG00000170485	NPAS2	0.424513
ENSG00000092853	CLSPN	0.410799
ENSG00000111206	FOXM1	0.398932
ENSG00000079616	KIF22	0.394618
ENSG00000111247	RAD51AP1	0.387293
ENSG00000188486	H2AFX	0.3761
ENSG00000012048	BRCA1	0.375339
ENSG00000167670	CHAF1A	0.374275
ENSG00000051180	RAD51	0.372003
ENSG00000168496	FEN1	0.370078
ENSG00000116717	GADD45A	0.369152
ENSG00000170312	CDK1	0.368999
ENSG00000077152	UBE2T	0.367281
ENSG00000125885	MCM8	0.362326
ENSG00000221829	FANCG	0.321739
ENSG00000132646	PCNA	0.31868
ENSG00000159259	CHAF1B	0.301728
ENSG00000140525	FANCI	0.296949
ENSG00000177084	POLE	0.261995
ENSG00000119684	MLH3	0.243878
ENSG00000049541	RFC2	0.23208
ENSG00000164104	HMGB2	0.226778
ENSG00000185088	RPS27L	0.203493
ENSG00000100865	CINP	0.200682
ENSG00000109685	WHSC1	0.180011
ENSG00000112941	PAPD7	0.179029
		Down regulated DNA repair Genes
ENSG00000104517	UBR5	-0.212868
ENSG00000081377	CDC14B	-0.220165
ENSG00000146414	SHPRH	-0.22367
ENSG00000154767	XPC	-0.227085
ENSG00000064933	PMS1	-0.255617
ENSG00000182179	UBA7	-0.273362
ENSG00000173559	NABP1	-0.273746
ENSG00000182263	FIGN	-0.326331
ENSG00000158290	CUL4B	-0.338626
ENSG00000127311	HELB	-0.343973
ENSG00000163840	DTX3L	-0.37013
ENSG00000138496	PARP9	-0.410658
ENSG00000009413	REV3L	-0.590226

## Sheet: 1d Overlap_with_Gene_Age_data
Overlapping genes with Gene Age list, downloaded from (http://genomics.senescence.info/genes/human.html)
A2M
AIFM1
BDNF
BLM
BRCA1
BUB1B
CCNA2
CDK1
CDKN1A
CTGF
E2F1
EEF1A1
EFEMP1
EGR1
EPS8
ESR1
FEN1
FLT1
FOXM1
GCLC
GSR
H2AFX
HDAC1
HELLS
HMGB2
IGF1
IGF2
IGFBP2
IL7R
JUN
LEP
LMNA
LMNB1
MYC
NCOR1
NOG
NRG1
PCNA
PDGFRA
PDGFRB
PIK3R1
PPARGC1A
PPM1D
PTGS2
PTK2B
RAD51
RECQL4
RET
SERPINE1
SOCS2
SOD2
STAT3
STAT5A
TFAP2A
TGFB1
TOP2A
VEGFA
