# Supplementary material for: Involvement of SPATA31 copy number variable genes in human lifespan
Source: Aging (Albany NY). 2018 Apr 19;10(4):674–88. doi: 10.18632/aging.101421 (PMC5940121; doi:10.18632/aging.101421)
Supplement: Supplementary Table S2 [file aging-10-101421-s003.xlsx]

## Sheet: Sheet1
Table S2 Gene-list Enrichment Analysis
Gene-list Enrichment Analysis was using the web server (http://kobas.cbi.pku.edu.cn/), All the genes that are significantly differentially expressed between Controls and SPATA31A1 over expression (Please see uppl Table S1, DeSeq2 output, padj <0.05) as input.
##Databases: KEGG PATHWAY
##Statistical test method: hypergeometric test / Fisher's exact test
##FDR correction method: Benjamini and Hochberg
#Term	Database	ID	Input number	Background number	P-Value	Corrected P-Value	Input	Hyperlink
Cell cycle	KEGG PATHWAY	hsa04110	39	124	1.16264239768e-11	3.29027798543e-09	ENSG00000080839|ENSG00000170312|ENSG00000117399|ENSG00000169679|ENSG00000112118|ENSG00000164611|ENSG00000105329|ENSG00000166508|ENSG00000135476|ENSG00000127564|ENSG00000166851|ENSG00000007968|ENSG00000105810|ENSG00000145604|ENSG00000111276|ENSG00000145386|ENSG00000124762|ENSG00000101412|ENSG00000114126|ENSG00000132646|ENSG00000073111|ENSG00000100297|ENSG00000116717|ENSG00000104738|ENSG00000156970…	http://www.genome.jp/kegg-bin/show_pathway?hsa04110/hsa:983%09red/hsa:9088%09red/hsa:701%09red/hsa:5347%09red/hsa:595%09red/hsa:8318%09red/hsa:1027%09red/hsa:1031%09red/hsa:891%09red/hsa:6502%09red/hsa:1870%09red/hsa:3065%09red/hsa:9133%09red/hsa:9700%09red/hsa:4176%09red/hsa:991%09red/hsa:990%09red/hsa:890%09red/hsa:994%09red/hsa:5111%09red/hsa:8555%09red/hsa:7029%09red/hsa:23594%09red/hsa:4998%…
Pathways in cancer	KEGG PATHWAY	hsa05200	73	399	2.50048878407e-10	3.53819162946e-08	ENSG00000134954|ENSG00000188153|ENSG00000134853|ENSG00000165731|ENSG00000138675|ENSG00000114423|ENSG00000017427|ENSG00000105329|ENSG00000005884|ENSG00000106571|ENSG00000113721|ENSG00000082512|ENSG00000077092|ENSG00000102678|ENSG00000073756|ENSG00000075651|ENSG00000087460|ENSG00000091136|ENSG00000056558|ENSG00000015475|ENSG00000091409|ENSG00000126561|ENSG00000049130|ENSG00000007968|ENSG00000116478…	http://www.genome.jp/kegg-bin/show_pathway?hsa05200/hsa:81029%09red/hsa:5915%09red/hsa:3675%09red/hsa:405%09red/hsa:1027%09red/hsa:595%09red/hsa:3912%09red/hsa:5743%09red/hsa:1163%09red/hsa:3725%09red/hsa:1286%09red/hsa:23604%09red/hsa:4609%09red/hsa:332%09red/hsa:4286%09red/hsa:2335%09red/hsa:623%09red/hsa:2149%09red/hsa:7477%09red/hsa:1438%09red/hsa:868%09red/hsa:7472%09red/hsa:862%09red/hsa:16…
ECM-receptor interaction	KEGG PATHWAY	hsa04512	27	83	9.07754883341e-09	6.94992898042e-07	ENSG00000188153|ENSG00000137809|ENSG00000005884|ENSG00000213949|ENSG00000091136|ENSG00000091409|ENSG00000163359|ENSG00000124145|ENSG00000168477|ENSG00000115414|ENSG00000161638|ENSG00000072571|ENSG00000135424|ENSG00000109072|ENSG00000082781|ENSG00000041982|ENSG00000118785|ENSG00000142156|ENSG00000081052|ENSG00000142173|ENSG00000164692|ENSG00000077943|ENSG00000132470|ENSG00000137801|ENSG00000115232…	http://www.genome.jp/kegg-bin/show_pathway?hsa04512/hsa:3912%09red/hsa:3676%09red/hsa:1278%09red/hsa:1291%09red/hsa:6385%09red/hsa:1293%09red/hsa:3371%09red/hsa:948%09red/hsa:2335%09red/hsa:7057%09red/hsa:3693%09red/hsa:3691%09red/hsa:7148%09red/hsa:3161%09red/hsa:3675%09red/hsa:8516%09red/hsa:3672%09red/hsa:3678%09red/hsa:3679%09red/hsa:3909%09red/hsa:1287%09red/hsa:1286%09red/hsa:1292%09red/hsa…
Proteoglycans in cancer	KEGG PATHWAY	hsa05205	45	208	9.82322117374e-09	6.94992898042e-07	ENSG00000011422|ENSG00000114423|ENSG00000017427|ENSG00000145362|ENSG00000172987|ENSG00000136869|ENSG00000105329|ENSG00000150995|ENSG00000091831|ENSG00000115904|ENSG00000173083|ENSG00000100234|ENSG00000112715|ENSG00000169032|ENSG00000124762|ENSG00000124749|ENSG00000077157|ENSG00000168610|ENSG00000124145|ENSG00000157240|ENSG00000115414|ENSG00000188064|ENSG00000167244|ENSG00000090020|ENSG00000105989…	http://www.genome.jp/kegg-bin/show_pathway?hsa05205/hsa:3708%09red/hsa:81029%09red/hsa:595%09red/hsa:5329%09red/hsa:2099%09red/hsa:7477%09red/hsa:7078%09red/hsa:868%09red/hsa:7472%09red/hsa:1839%09red/hsa:6385%09red/hsa:81578%09red/hsa:7099%09red/hsa:1634%09red/hsa:3479%09red/hsa:1975%09red/hsa:2335%09red/hsa:5604%09red/hsa:287%09red/hsa:3693%09red/hsa:7855%09red/hsa:60495%09red/hsa:3481%09red/hs…
PI3K-Akt signaling pathway	KEGG PATHWAY	hsa04151	61	343	1.83152809941e-08	9.32588247732e-07	ENSG00000107175|ENSG00000134853|ENSG00000138675|ENSG00000017427|ENSG00000188153|ENSG00000005884|ENSG00000113721|ENSG00000102678|ENSG00000185291|ENSG00000136869|ENSG00000213949|ENSG00000091136|ENSG00000118515|ENSG00000091409|ENSG00000049130|ENSG00000181072|ENSG00000145431|ENSG00000105810|ENSG00000111276|ENSG00000112715|ENSG00000169242|ENSG00000153094|ENSG00000169032|ENSG00000124762|ENSG00000163359…	http://www.genome.jp/kegg-bin/show_pathway?hsa04151/hsa:64764%09red/hsa:3691%09red/hsa:5156%09red/hsa:56034%09red/hsa:595%09red/hsa:3563%09red/hsa:3676%09red/hsa:1286%09red/hsa:9180%09red/hsa:22801%09red/hsa:1287%09red/hsa:1278%09red/hsa:2149%09red/hsa:1291%09red/hsa:3679%09red/hsa:1293%09red/hsa:3371%09red/hsa:7099%09red/hsa:3479%09red/hsa:1975%09red/hsa:2250%09red/hsa:2335%09red/hsa:5604%09red/…
Focal adhesion	KEGG PATHWAY	hsa04510	44	206	1.97721889978e-08	9.32588247732e-07	ENSG00000188153|ENSG00000134853|ENSG00000065534|ENSG00000017427|ENSG00000131504|ENSG00000005884|ENSG00000113721|ENSG00000213949|ENSG00000091136|ENSG00000091409|ENSG00000177606|ENSG00000145431|ENSG00000197461|ENSG00000112715|ENSG00000169032|ENSG00000163359|ENSG00000170962|ENSG00000077157|ENSG00000137809|ENSG00000168477|ENSG00000115414|ENSG00000148082|ENSG00000115904|ENSG00000161638|ENSG00000135424…	http://www.genome.jp/kegg-bin/show_pathway?hsa04510/hsa:5156%09red/hsa:56034%09red/hsa:595%09red/hsa:3912%09red/hsa:3676%09red/hsa:3725%09red/hsa:1729%09red/hsa:1278%09red/hsa:4638%09red/hsa:1291%09red/hsa:1292%09red/hsa:1293%09red/hsa:3371%09red/hsa:3479%09red/hsa:22801%09red/hsa:2335%09red/hsa:5604%09red/hsa:3693%09red/hsa:3691%09red/hsa:7148%09red/hsa:3655%09red/hsa:3675%09red/hsa:8516%09red/h…
HTLV-I infection	KEGG PATHWAY	hsa05166	46	259	1.02523332951e-06	4.14487188932e-05	ENSG00000134954|ENSG00000134853|ENSG00000117399|ENSG00000164938|ENSG00000213585|ENSG00000120738|ENSG00000164611|ENSG00000105329|ENSG00000126561|ENSG00000120837|ENSG00000185697|ENSG00000157456|ENSG00000197461|ENSG00000134470|ENSG00000179218|ENSG00000175592|ENSG00000124762|ENSG00000177606|ENSG00000101057|ENSG00000157240|ENSG00000132646|ENSG00000188064|ENSG00000090339|ENSG00000105989|ENSG00000075711…	http://www.genome.jp/kegg-bin/show_pathway?hsa05166/hsa:3601%09red/hsa:3600%09red/hsa:3383%09red/hsa:595%09red/hsa:3725%09red/hsa:4801%09red/hsa:7416%09red/hsa:7477%09red/hsa:7472%09red/hsa:1031%09red/hsa:81029%09red/hsa:4488%09red/hsa:64784%09red/hsa:1870%09red/hsa:4603%09red/hsa:9133%09red/hsa:7855%09red/hsa:1959%09red/hsa:1958%09red/hsa:701%09red/hsa:94241%09red/hsa:5156%09red/hsa:991%09red/hs…
Hypertrophic cardiomyopathy (HCM)	KEGG PATHWAY	hsa05410	23	85	1.66813728861e-06	5.90103565847e-05	ENSG00000159640|ENSG00000175084|ENSG00000017427|ENSG00000005884|ENSG00000213949|ENSG00000105329|ENSG00000143549|ENSG00000157388|ENSG00000091409|ENSG00000174437|ENSG00000075461|ENSG00000161638|ENSG00000082781|ENSG00000135424|ENSG00000198947|ENSG00000106617|ENSG00000077943|ENSG00000132470|ENSG00000115232|ENSG00000137809|ENSG00000160789|ENSG00000118194|ENSG00000119699	http://www.genome.jp/kegg-bin/show_pathway?hsa05410/hsa:3676%09red/hsa:51422%09red/hsa:488%09red/hsa:1674%09red/hsa:4000%09red/hsa:1636%09red/hsa:3479%09red/hsa:27092%09red/hsa:3693%09red/hsa:3691%09red/hsa:3655%09red/hsa:3675%09red/hsa:8516%09red/hsa:776%09red/hsa:3672%09red/hsa:3678%09red/hsa:3679%09red/hsa:1756%09red/hsa:7139%09red/hsa:22801%09red/hsa:7170%09red/hsa:7043%09red/hsa:7040%09red
Glycolysis / Gluconeogenesis	KEGG PATHWAY	hsa00010	20	67	2.24174787964e-06	7.04905166596e-05	ENSG00000141959|ENSG00000154930|ENSG00000196616|ENSG00000197894|ENSG00000134333|ENSG00000165140|ENSG00000159399|ENSG00000067057|ENSG00000109107|ENSG00000111640|ENSG00000102144|ENSG00000184254|ENSG00000149925|ENSG00000111674|ENSG00000111275|ENSG00000074800|ENSG00000111669|ENSG00000067225|ENSG00000171314|ENSG00000105220	http://www.genome.jp/kegg-bin/show_pathway?hsa00010/hsa:2023%09red/hsa:230%09red/hsa:226%09red/hsa:2026%09red/hsa:220%09red/hsa:5211%09red/hsa:125%09red/hsa:5223%09red/hsa:2597%09red/hsa:128%09red/hsa:5214%09red/hsa:3099%09red/hsa:5230%09red/hsa:7167%09red/hsa:5315%09red/hsa:84532%09red/hsa:3939%09red/hsa:2821%09red/hsa:2203%09red/hsa:217%09red
Regulation of actin cytoskeleton	KEGG PATHWAY	hsa04810	39	219	6.2387528959e-06	0,000176556706954	ENSG00000134853|ENSG00000065534|ENSG00000138675|ENSG00000082781|ENSG00000131504|ENSG00000005884|ENSG00000102678|ENSG00000213949|ENSG00000091409|ENSG00000181072|ENSG00000145431|ENSG00000197461|ENSG00000169032|ENSG00000136002|ENSG00000112290|ENSG00000133019|ENSG00000077157|ENSG00000070087|ENSG00000115020|ENSG00000115414|ENSG00000090020|ENSG00000115904|ENSG00000133026|ENSG00000102606|ENSG00000161638…	http://www.genome.jp/kegg-bin/show_pathway?hsa04810/hsa:200576%09red/hsa:3691%09red/hsa:10109%09red/hsa:5156%09red/hsa:56034%09red/hsa:3676%09red/hsa:5154%09red/hsa:1729%09red/hsa:623%09red/hsa:2335%09red/hsa:1131%09red/hsa:2149%09red/hsa:4638%09red/hsa:2254%09red/hsa:2250%09red/hsa:128239%09red/hsa:5604%09red/hsa:3693%09red/hsa:8874%09red/hsa:6548%09red/hsa:3655%09red/hsa:3675%09red/hsa:8516%09r…
Gap junction	KEGG PATHWAY	hsa04540	22	88	8.19947766581e-06	0,00021095019813	ENSG00000166484|ENSG00000134853|ENSG00000170312|ENSG00000061918|ENSG00000167552|ENSG00000167553|ENSG00000087460|ENSG00000150995|ENSG00000196230|ENSG00000145431|ENSG00000197461|ENSG00000169032|ENSG00000123416|ENSG00000135914|ENSG00000137267|ENSG00000115904|ENSG00000188229|ENSG00000176014|ENSG00000113721|ENSG00000164116|ENSG00000170962|ENSG00000127824	http://www.genome.jp/kegg-bin/show_pathway?hsa04540/hsa:3708%09red/hsa:983%09red/hsa:2983%09red/hsa:2982%09red/hsa:56034%09red/hsa:84790%09red/hsa:5604%09red/hsa:3357%09red/hsa:7280%09red/hsa:5156%09red/hsa:5154%09red/hsa:5159%09red/hsa:5598%09red/hsa:6654%09red/hsa:10383%09red/hsa:84617%09red/hsa:203068%09red/hsa:80310%09red/hsa:2778%09red/hsa:7277%09red/hsa:7846%09red/hsa:10376%09red
Arrhythmogenic right ventricular cardiomyopathy (ARVC)	KEGG PATHWAY	hsa05412	20	75	9.34383629502e-06	0,000220358805957	ENSG00000096696|ENSG00000115232|ENSG00000135424|ENSG00000174437|ENSG00000175084|ENSG00000198947|ENSG00000077943|ENSG00000170558|ENSG00000005884|ENSG00000161638|ENSG00000132470|ENSG00000046604|ENSG00000160789|ENSG00000082781|ENSG00000057294|ENSG00000213949|ENSG00000157388|ENSG00000137809|ENSG00000091409|ENSG00000075461	http://www.genome.jp/kegg-bin/show_pathway?hsa05412/hsa:1829%09red/hsa:5318%09red/hsa:8516%09red/hsa:776%09red/hsa:3672%09red/hsa:3675%09red/hsa:3678%09red/hsa:3679%09red/hsa:1832%09red/hsa:27092%09red/hsa:1000%09red/hsa:3693%09red/hsa:3691%09red/hsa:4000%09red/hsa:22801%09red/hsa:1756%09red/hsa:3676%09red/hsa:488%09red/hsa:1674%09red/hsa:3655%09red
Dilated cardiomyopathy	KEGG PATHWAY	hsa05414	22	90	1.10946986693e-05	0,000241523055647	ENSG00000175084|ENSG00000017427|ENSG00000005884|ENSG00000213949|ENSG00000087460|ENSG00000105329|ENSG00000143549|ENSG00000157388|ENSG00000091409|ENSG00000174437|ENSG00000075461|ENSG00000161638|ENSG00000082781|ENSG00000135424|ENSG00000198947|ENSG00000077943|ENSG00000132470|ENSG00000115232|ENSG00000137809|ENSG00000160789|ENSG00000118194|ENSG00000119699	http://www.genome.jp/kegg-bin/show_pathway?hsa05414/hsa:3676%09red/hsa:488%09red/hsa:1674%09red/hsa:4000%09red/hsa:3479%09red/hsa:27092%09red/hsa:3693%09red/hsa:3691%09red/hsa:3655%09red/hsa:3675%09red/hsa:8516%09red/hsa:776%09red/hsa:3672%09red/hsa:3678%09red/hsa:3679%09red/hsa:1756%09red/hsa:7139%09red/hsa:2778%09red/hsa:22801%09red/hsa:7170%09red/hsa:7043%09red/hsa:7040%09red
Bladder cancer	KEGG PATHWAY	hsa05219	14	41	2.13802319096e-05	0,000432186116458	ENSG00000124762|ENSG00000112715|ENSG00000110092|ENSG00000196611|ENSG00000169032|ENSG00000113070|ENSG00000136997|ENSG00000137801|ENSG00000101412|ENSG00000087245|ENSG00000068028|ENSG00000196730|ENSG00000007968|ENSG00000035664	http://www.genome.jp/kegg-bin/show_pathway?hsa05219/hsa:1026%09red/hsa:1839%09red/hsa:4312%09red/hsa:4313%09red/hsa:1612%09red/hsa:11186%09red/hsa:1870%09red/hsa:5604%09red/hsa:7057%09red/hsa:23604%09red/hsa:7422%09red/hsa:4609%09red/hsa:1869%09red/hsa:595%09red
Small cell lung cancer	KEGG PATHWAY	hsa05222	21	88	2.36864257111e-05	0,000446883898416	ENSG00000115414|ENSG00000188153|ENSG00000007171|ENSG00000073756|ENSG00000105810|ENSG00000145604|ENSG00000136997|ENSG00000111276|ENSG00000005884|ENSG00000110092|ENSG00000007968|ENSG00000082512|ENSG00000091136|ENSG00000101412|ENSG00000077092|ENSG00000173207|ENSG00000145675|ENSG00000053747|ENSG00000056558|ENSG00000081052|ENSG00000091409	http://www.genome.jp/kegg-bin/show_pathway?hsa05222/hsa:1027%09red/hsa:3675%09red/hsa:7185%09red/hsa:1163%09red/hsa:5915%09red/hsa:1021%09red/hsa:1286%09red/hsa:2335%09red/hsa:595%09red/hsa:3912%09red/hsa:5295%09red/hsa:6502%09red/hsa:1870%09red/hsa:7188%09red/hsa:4609%09red/hsa:1287%09red/hsa:5743%09red/hsa:4843%09red/hsa:1869%09red/hsa:3909%09red/hsa:3655%09red
DNA replication	KEGG PATHWAY	hsa03030	13	36	2.59454677725e-05	0,000458910461225	ENSG00000132646|ENSG00000100297|ENSG00000014138|ENSG00000104889|ENSG00000105486|ENSG00000073111|ENSG00000112118|ENSG00000136104|ENSG00000104738|ENSG00000168496|ENSG00000177084|ENSG00000049541|ENSG00000166508	http://www.genome.jp/kegg-bin/show_pathway?hsa03030/hsa:4176%09red/hsa:4174%09red/hsa:4172%09red/hsa:4173%09red/hsa:23649%09red/hsa:5426%09red/hsa:5111%09red/hsa:4171%09red/hsa:79621%09red/hsa:10535%09red/hsa:5982%09red/hsa:3978%09red/hsa:2237%09red
FoxO signaling pathway	KEGG PATHWAY	hsa04068	27	135	2.81810739579e-05	0,000469131995888	ENSG00000017427|ENSG00000176171|ENSG00000142731|ENSG00000156804|ENSG00000118515|ENSG00000105329|ENSG00000139112|ENSG00000166851|ENSG00000145604|ENSG00000111276|ENSG00000166349|ENSG00000153094|ENSG00000169032|ENSG00000124762|ENSG00000127528|ENSG00000168610|ENSG00000115904|ENSG00000116717|ENSG00000170989|ENSG00000145675|ENSG00000168685|ENSG00000106617|ENSG00000110092|ENSG00000157456|ENSG00000101109…	http://www.genome.jp/kegg-bin/show_pathway?hsa04068/hsa:5347%09red/hsa:595%09red/hsa:51422%09red/hsa:10733%09red/hsa:114907%09red/hsa:3479%09red/hsa:6502%09red/hsa:5604%09red/hsa:9133%09red/hsa:664%09red/hsa:6446%09red/hsa:1027%09red/hsa:10365%09red/hsa:891%09red/hsa:5295%09red/hsa:3575%09red/hsa:10018%09red/hsa:6654%09red/hsa:23710%09red/hsa:1647%09red/hsa:1026%09red/hsa:6774%09red/hsa:1901%09re…
HIF-1 signaling pathway	KEGG PATHWAY	hsa04066	23	105	3.20076917708e-05	0,000503232042841	ENSG00000102265|ENSG00000017427|ENSG00000159399|ENSG00000111640|ENSG00000141959|ENSG00000136869|ENSG00000170525|ENSG00000111276|ENSG00000112715|ENSG00000169032|ENSG00000124762|ENSG00000102144|ENSG00000106366|ENSG00000160712|ENSG00000143437|ENSG00000111674|ENSG00000145675|ENSG00000074800|ENSG00000168610|ENSG00000007171|ENSG00000134333|ENSG00000149925|ENSG00000102755	http://www.genome.jp/kegg-bin/show_pathway?hsa04066/hsa:405%09red/hsa:3939%09red/hsa:2023%09red/hsa:2026%09red/hsa:7099%09red/hsa:3479%09red/hsa:7076%09red/hsa:5211%09red/hsa:5604%09red/hsa:5230%09red/hsa:5054%09red/hsa:226%09red/hsa:3570%09red/hsa:5295%09red/hsa:3099%09red/hsa:7422%09red/hsa:1027%09red/hsa:1026%09red/hsa:6774%09red/hsa:2321%09red/hsa:2597%09red/hsa:4843%09red/hsa:5209%09red
Calcium signaling pathway	KEGG PATHWAY	hsa04020	32	179	3.81813535777e-05	0,000568701213815	ENSG00000134853|ENSG00000065534|ENSG00000170214|ENSG00000133019|ENSG00000160014|ENSG00000213585|ENSG00000087460|ENSG00000170425|ENSG00000157388|ENSG00000120899|ENSG00000150995|ENSG00000181072|ENSG00000141404|ENSG00000154678|ENSG00000196639|ENSG00000135914|ENSG00000174437|ENSG00000171873|ENSG00000006283|ENSG00000180914|ENSG00000181104|ENSG00000115252|ENSG00000007171|ENSG00000058668|ENSG00000113721…	http://www.genome.jp/kegg-bin/show_pathway?hsa04020/hsa:3708%09red/hsa:5021%09red/hsa:3707%09red/hsa:623%09red/hsa:1131%09red/hsa:7416%09red/hsa:2149%09red/hsa:4638%09red/hsa:808%09red/hsa:488%09red/hsa:6786%09red/hsa:3357%09red/hsa:6547%09red/hsa:2185%09red/hsa:5156%09red/hsa:776%09red/hsa:5137%09red/hsa:5136%09red/hsa:146%09red/hsa:147%09red/hsa:5159%09red/hsa:493%09red/hsa:490%09red/hsa:1129%0…
Apoptosis	KEGG PATHWAY	hsa04210	27	142	6.02817042521e-05	0,000852986115167	ENSG00000109861|ENSG00000164733|ENSG00000167553|ENSG00000185291|ENSG00000103811|ENSG00000056558|ENSG00000015475|ENSG00000177606|ENSG00000150995|ENSG00000153094|ENSG00000169032|ENSG00000156709|ENSG00000123416|ENSG00000089685|ENSG00000163629|ENSG00000173535|ENSG00000173530|ENSG00000176619|ENSG00000116717|ENSG00000167552|ENSG00000174080|ENSG00000145675|ENSG00000141682|ENSG00000113368|ENSG00000101160…	http://www.genome.jp/kegg-bin/show_pathway?hsa04210/hsa:3708%09red/hsa:84790%09red/hsa:8793%09red/hsa:3563%09red/hsa:5366%09red/hsa:332%09red/hsa:1522%09red/hsa:5783%09red/hsa:4000%09red/hsa:4001%09red/hsa:1508%09red/hsa:1075%09red/hsa:5604%09red/hsa:9131%09red/hsa:8722%09red/hsa:7185%09red/hsa:637%09red/hsa:3725%09red/hsa:5295%09red/hsa:84823%09red/hsa:10018%09red/hsa:8794%09red/hsa:1647%09red/h…
AGE-RAGE signaling pathway in diabetic complications	KEGG PATHWAY	hsa04933	22	103	6.51582718955e-05	0,000878085283163	ENSG00000188153|ENSG00000131504|ENSG00000110092|ENSG00000145675|ENSG00000105329|ENSG00000177606|ENSG00000108691|ENSG00000111276|ENSG00000112715|ENSG00000168610|ENSG00000126561|ENSG00000106366|ENSG00000115414|ENSG00000090339|ENSG00000087245|ENSG00000125538|ENSG00000164692|ENSG00000120738|ENSG00000138193|ENSG00000119699|ENSG00000081052|ENSG00000117525	http://www.genome.jp/kegg-bin/show_pathway?hsa04933/hsa:3383%09red/hsa:595%09red/hsa:3725%09red/hsa:1729%09red/hsa:1278%09red/hsa:2335%09red/hsa:6347%09red/hsa:2152%09red/hsa:1958%09red/hsa:5054%09red/hsa:1027%09red/hsa:3553%09red/hsa:1286%09red/hsa:5295%09red/hsa:7422%09red/hsa:6776%09red/hsa:51196%09red/hsa:6774%09red/hsa:4313%09red/hsa:7043%09red/hsa:1287%09red/hsa:7040%09red
Axon guidance	KEGG PATHWAY	hsa04360	31	178	7.67216441312e-05	0,000986919331325	ENSG00000106123|ENSG00000136040|ENSG00000143869|ENSG00000198910|ENSG00000185008|ENSG00000164220|ENSG00000145147|ENSG00000221866|ENSG00000196935|ENSG00000169242|ENSG00000112902|ENSG00000138623|ENSG00000162631|ENSG00000137872|ENSG00000138835|ENSG00000107731|ENSG00000075223|ENSG00000108947|ENSG00000111186|ENSG00000145675|ENSG00000137672|ENSG00000065320|ENSG00000107562|ENSG00000099250|ENSG00000173210…	http://www.genome.jp/kegg-bin/show_pathway?hsa04360/hsa:55558%09red/hsa:10512%09red/hsa:6586%09red/hsa:9423%09red/hsa:3897%09red/hsa:6387%09red/hsa:81029%09red/hsa:2051%09red/hsa:2043%09red/hsa:91584%09red/hsa:7225%09red/hsa:2048%09red/hsa:2049%09red/hsa:80031%09red/hsa:22854%09red/hsa:6092%09red/hsa:10507%09red/hsa:5295%09red/hsa:57522%09red/hsa:10154%09red/hsa:22885%09red/hsa:151449%09red/hsa:2…
p53 signaling pathway	KEGG PATHWAY	hsa04115	17	69	9.85395243436e-05	0,00116488514044	ENSG00000170312|ENSG00000017427|ENSG00000157456|ENSG00000106366|ENSG00000112378|ENSG00000116717|ENSG00000075218|ENSG00000124762|ENSG00000105810|ENSG00000137801|ENSG00000170836|ENSG00000110092|ENSG00000149212|ENSG00000171848|ENSG00000141682|ENSG00000015475|ENSG00000134057	http://www.genome.jp/kegg-bin/show_pathway?hsa04115/hsa:1647%09red/hsa:637%09red/hsa:983%09red/hsa:143686%09red/hsa:1021%09red/hsa:891%09red/hsa:595%09red/hsa:3479%09red/hsa:5366%09red/hsa:51512%09red/hsa:64065%09red/hsa:7057%09red/hsa:9133%09red/hsa:6241%09red/hsa:1026%09red/hsa:8493%09red/hsa:5054%09red
Metabolic pathways	KEGG PATHWAY	hsa01100	134	1240	0,000101677250014	0,00116488514044	ENSG00000122884|ENSG00000197894|ENSG00000148344|ENSG00000109107|ENSG00000138413|ENSG00000111669|ENSG00000186281|ENSG00000111058|ENSG00000100031|ENSG00000165092|ENSG00000139629|ENSG00000196139|ENSG00000115652|ENSG00000124212|ENSG00000172987|ENSG00000187210|ENSG00000161267|ENSG00000173599|ENSG00000067057|ENSG00000177084|ENSG00000111674|ENSG00000119711|ENSG00000007171|ENSG00000164237|ENSG00000115339…	http://www.genome.jp/kegg-bin/show_pathway?hsa01100/hsa:4907%09red/hsa:316%09red/hsa:2632%09red/hsa:150763%09red/hsa:8309%09red/hsa:10826%09red/hsa:9060%09red/hsa:2023%09red/hsa:2026%09red/hsa:8704%09red/hsa:8871%09red/hsa:128%09red/hsa:5230%09red/hsa:3417%09red/hsa:66008%09red/hsa:125%09red/hsa:9249%09red/hsa:8702%09red/hsa:349565%09red/hsa:6611%09red/hsa:51196%09red/hsa:10855%09red/hsa:56895%09…
Endocrine resistance	KEGG PATHWAY	hsa01522	21	99	0,000102905047742	0,00116488514044	ENSG00000124151|ENSG00000124762|ENSG00000148082|ENSG00000091831|ENSG00000115904|ENSG00000017427|ENSG00000111276|ENSG00000141027|ENSG00000110092|ENSG00000169032|ENSG00000113070|ENSG00000164850|ENSG00000101412|ENSG00000087245|ENSG00000134250|ENSG00000145675|ENSG00000087460|ENSG00000007968|ENSG00000101384|ENSG00000123080|ENSG00000177606	http://www.genome.jp/kegg-bin/show_pathway?hsa01522/hsa:1027%09red/hsa:9611%09red/hsa:3725%09red/hsa:1839%09red/hsa:1026%09red/hsa:4313%09red/hsa:595%09red/hsa:3479%09red/hsa:182%09red/hsa:5295%09red/hsa:2099%09red/hsa:53358%09red/hsa:1870%09red/hsa:6654%09red/hsa:5604%09red/hsa:2778%09red/hsa:2852%09red/hsa:8202%09red/hsa:1869%09red/hsa:4853%09red/hsa:1031%09red
Melanoma	KEGG PATHWAY	hsa05218	17	73	0,000176581580814	0,00182001794736	ENSG00000007968|ENSG00000134853|ENSG00000138675|ENSG00000145431|ENSG00000187098|ENSG00000197461|ENSG00000017427|ENSG00000110092|ENSG00000169032|ENSG00000124762|ENSG00000105810|ENSG00000101412|ENSG00000102678|ENSG00000138685|ENSG00000145675|ENSG00000170962|ENSG00000113721	http://www.genome.jp/kegg-bin/show_pathway?hsa05218/hsa:5156%09red/hsa:5154%09red/hsa:1021%09red/hsa:2250%09red/hsa:1026%09red/hsa:56034%09red/hsa:595%09red/hsa:3479%09red/hsa:2247%09red/hsa:5159%09red/hsa:5295%09red/hsa:1870%09red/hsa:5604%09red/hsa:80310%09red/hsa:2254%09red/hsa:4286%09red/hsa:1869%09red
Hippo signaling pathway	KEGG PATHWAY	hsa04390	27	153	0,000178774999665	0,00182001794736	ENSG00000073350|ENSG00000163558|ENSG00000105329|ENSG00000151748|ENSG00000126016|ENSG00000170365|ENSG00000187079|ENSG00000156466|ENSG00000125378|ENSG00000143869|ENSG00000106366|ENSG00000068028|ENSG00000157240|ENSG00000132849|ENSG00000188064|ENSG00000089685|ENSG00000105989|ENSG00000075711|ENSG00000111186|ENSG00000163251|ENSG00000125965|ENSG00000118523|ENSG00000113645|ENSG00000110092|ENSG00000136997…	http://www.genome.jp/kegg-bin/show_pathway?hsa04390/hsa:5584%09red/hsa:595%09red/hsa:151449%09red/hsa:332%09red/hsa:7477%09red/hsa:3993%09red/hsa:7472%09red/hsa:81029%09red/hsa:4771%09red/hsa:10207%09red/hsa:23286%09red/hsa:7855%09red/hsa:11186%09red/hsa:5054%09red/hsa:652%09red/hsa:392255%09red/hsa:4086%09red/hsa:1739%09red/hsa:8200%09red/hsa:60485%09red/hsa:8321%09red/hsa:7043%09red/hsa:7040%09…
Transcriptional misregulation in cancer	KEGG PATHWAY	hsa05202	30	179	0,000180072447088	0,00182001794736	ENSG00000185630|ENSG00000135903|ENSG00000005073|ENSG00000119508|ENSG00000253293|ENSG00000089280|ENSG00000109685|ENSG00000111276|ENSG00000017427|ENSG00000056558|ENSG00000124762|ENSG00000104368|ENSG00000170365|ENSG00000079102|ENSG00000141027|ENSG00000172379|ENSG00000244405|ENSG00000149968|ENSG00000125675|ENSG00000116478|ENSG00000139318|ENSG00000178573|ENSG00000149948|ENSG00000136997|ENSG00000138756…	http://www.genome.jp/kegg-bin/show_pathway?hsa05202/hsa:5327%09red/hsa:64332%09red/hsa:8013%09red/hsa:5154%09red/hsa:4314%09red/hsa:1031%09red/hsa:862%09red/hsa:3479%09red/hsa:9915%09red/hsa:3065%09red/hsa:4086%09red/hsa:7185%09red/hsa:9611%09red/hsa:5077%09red/hsa:1026%09red/hsa:2521%09red/hsa:2892%09red/hsa:51513%09red/hsa:7468%09red/hsa:1027%09red/hsa:1848%09red/hsa:3207%09red/hsa:3206%09red/h…
Rap1 signaling pathway	KEGG PATHWAY	hsa04015	34	216	0,000200947106168	0,00196096658778	ENSG00000068831|ENSG00000134853|ENSG00000105738|ENSG00000017427|ENSG00000102678|ENSG00000170425|ENSG00000163558|ENSG00000138675|ENSG00000145431|ENSG00000197461|ENSG00000112715|ENSG00000169242|ENSG00000197555|ENSG00000169032|ENSG00000108984|ENSG00000116991|ENSG00000070087|ENSG00000160014|ENSG00000006607|ENSG00000087460|ENSG00000138685|ENSG00000145675|ENSG00000079337|ENSG00000049130|ENSG00000181104…	http://www.genome.jp/kegg-bin/show_pathway?hsa04015/hsa:10411%09red/hsa:5584%09red/hsa:56034%09red/hsa:26037%09red/hsa:2149%09red/hsa:808%09red/hsa:3479%09red/hsa:2250%09red/hsa:5604%09red/hsa:5217%09red/hsa:9855%09red/hsa:5608%09red/hsa:5156%09red/hsa:5154%09red/hsa:5228%09red/hsa:5295%09red/hsa:5159%09red/hsa:7422%09red/hsa:57568%09red/hsa:9693%09red/hsa:23094%09red/hsa:51196%09red/hsa:80310%09…
Chronic myeloid leukemia	KEGG PATHWAY	hsa05220	17	75	0,000232755623157	0,00219509738387	ENSG00000007968|ENSG00000148082|ENSG00000114423|ENSG00000115904|ENSG00000136997|ENSG00000111276|ENSG00000110092|ENSG00000169032|ENSG00000124762|ENSG00000105810|ENSG00000101412|ENSG00000033327|ENSG00000145675|ENSG00000105329|ENSG00000119699|ENSG00000116478|ENSG00000126561	http://www.genome.jp/kegg-bin/show_pathway?hsa05220/hsa:6776%09red/hsa:1027%09red/hsa:4609%09red/hsa:868%09red/hsa:1021%09red/hsa:1026%09red/hsa:595%09red/hsa:7040%09red/hsa:5295%09red/hsa:53358%09red/hsa:1870%09red/hsa:6654%09red/hsa:5604%09red/hsa:7043%09red/hsa:9846%09red/hsa:3065%09red/hsa:1869%09red
EGFR tyrosine kinase inhibitor resistance	KEGG PATHWAY	hsa01521	18	83	0,000247462041278	0,00219509738387	ENSG00000134853|ENSG00000112715|ENSG00000113721|ENSG00000115904|ENSG00000145431|ENSG00000017427|ENSG00000197461|ENSG00000183087|ENSG00000160712|ENSG00000153094|ENSG00000169032|ENSG00000148082|ENSG00000138685|ENSG00000157168|ENSG00000145675|ENSG00000168610|ENSG00000170962|ENSG00000109458	http://www.genome.jp/kegg-bin/show_pathway?hsa01521/hsa:80310%09red/hsa:5156%09red/hsa:6774%09red/hsa:3479%09red/hsa:2621%09red/hsa:5295%09red/hsa:56034%09red/hsa:3570%09red/hsa:10018%09red/hsa:5159%09red/hsa:2247%09red/hsa:3084%09red/hsa:6654%09red/hsa:5154%09red/hsa:5604%09red/hsa:2549%09red/hsa:7422%09red/hsa:53358%09red
Hepatitis B	KEGG PATHWAY	hsa05161	26	148	0,000248208891462	0,00219509738387	ENSG00000107175|ENSG00000170581|ENSG00000164342|ENSG00000136869|ENSG00000105329|ENSG00000145386|ENSG00000120899|ENSG00000177606|ENSG00000007968|ENSG00000136997|ENSG00000111276|ENSG00000115267|ENSG00000169032|ENSG00000124762|ENSG00000089685|ENSG00000168610|ENSG00000126561|ENSG00000132646|ENSG00000122877|ENSG00000145675|ENSG00000095015|ENSG00000182158|ENSG00000110092|ENSG00000105810|ENSG00000101412…	http://www.genome.jp/kegg-bin/show_pathway?hsa05161/hsa:64764%09red/hsa:595%09red/hsa:3725%09red/hsa:332%09red/hsa:7098%09red/hsa:7099%09red/hsa:1870%09red/hsa:5604%09red/hsa:2185%09red/hsa:1959%09red/hsa:1027%09red/hsa:890%09red/hsa:64135%09red/hsa:5111%09red/hsa:5295%09red/hsa:10488%09red/hsa:6776%09red/hsa:1026%09red/hsa:6774%09red/hsa:6773%09red/hsa:1021%09red/hsa:4214%09red/hsa:7043%09red/hs…
MAPK signaling pathway	KEGG PATHWAY	hsa04010	38	257	0,000271028471601	0,00232427446858	ENSG00000068831|ENSG00000166484|ENSG00000134853|ENSG00000138675|ENSG00000148053|ENSG00000102678|ENSG00000185652|ENSG00000157388|ENSG00000176697|ENSG00000177606|ENSG00000071242|ENSG00000107968|ENSG00000197461|ENSG00000169032|ENSG00000108984|ENSG00000120875|ENSG00000139625|ENSG00000105329|ENSG00000075461|ENSG00000115904|ENSG00000116711|ENSG00000116717|ENSG00000126803|ENSG00000006283|ENSG00000138032…	http://www.genome.jp/kegg-bin/show_pathway?hsa04010/hsa:5321%09red/hsa:4915%09red/hsa:3725%09red/hsa:27092%09red/hsa:627%09red/hsa:3554%09red/hsa:2254%09red/hsa:2250%09red/hsa:5604%09red/hsa:4908%09red/hsa:5495%09red/hsa:6789%09red/hsa:5608%09red/hsa:5156%09red/hsa:3553%09red/hsa:5154%09red/hsa:776%09red/hsa:994%09red/hsa:6196%09red/hsa:5159%09red/hsa:5598%09red/hsa:6654%09red/hsa:3925%09red/hsa:…
Central carbon metabolism in cancer	KEGG PATHWAY	hsa05230	16	69	0,000282236388399	0,00234920287991	ENSG00000157404|ENSG00000134853|ENSG00000141526|ENSG00000103257|ENSG00000134333|ENSG00000136997|ENSG00000067057|ENSG00000159399|ENSG00000113721|ENSG00000138413|ENSG00000169032|ENSG00000141959|ENSG00000165731|ENSG00000145675|ENSG00000067225|ENSG00000171314	http://www.genome.jp/kegg-bin/show_pathway?hsa05230/hsa:5156%09red/hsa:5211%09red/hsa:3815%09red/hsa:5223%09red/hsa:5295%09red/hsa:5159%09red/hsa:9123%09red/hsa:5604%09red/hsa:5214%09red/hsa:3099%09red/hsa:3417%09red/hsa:5315%09red/hsa:4609%09red/hsa:3939%09red/hsa:5979%09red/hsa:8140%09red
Ras signaling pathway	KEGG PATHWAY	hsa04014	35	231	0,000309936874134	0,00250606101086	ENSG00000134954|ENSG00000068831|ENSG00000134853|ENSG00000138675|ENSG00000017427|ENSG00000102678|ENSG00000165527|ENSG00000138193|ENSG00000145431|ENSG00000197461|ENSG00000112715|ENSG00000169242|ENSG00000169032|ENSG00000033327|ENSG00000176485|ENSG00000068028|ENSG00000148082|ENSG00000160014|ENSG00000115904|ENSG00000174791|ENSG00000141068|ENSG00000116711|ENSG00000075651|ENSG00000138685|ENSG00000145675…	http://www.genome.jp/kegg-bin/show_pathway?hsa04014/hsa:9610%09red/hsa:5321%09red/hsa:5156%09red/hsa:56034%09red/hsa:11186%09red/hsa:9462%09red/hsa:5228%09red/hsa:808%09red/hsa:3479%09red/hsa:2250%09red/hsa:1942%09red/hsa:5604%09red/hsa:2549%09red/hsa:3815%09red/hsa:382%09red/hsa:6789%09red/hsa:5337%09red/hsa:23179%09red/hsa:5154%09red/hsa:2113%09red/hsa:5295%09red/hsa:5159%09red/hsa:6654%09red/h…
Hematopoietic cell lineage	KEGG PATHWAY	hsa04640	18	86	0,000359548420475	0,00282645008318	ENSG00000168685|ENSG00000157404|ENSG00000115594|ENSG00000115232|ENSG00000005884|ENSG00000095752|ENSG00000160712|ENSG00000161638|ENSG00000125538|ENSG00000166825|ENSG00000085063|ENSG00000185291|ENSG00000213949|ENSG00000049130|ENSG00000198223|ENSG00000135218|ENSG00000091409|ENSG00000158473	http://www.genome.jp/kegg-bin/show_pathway?hsa04640/hsa:3589%09red/hsa:3675%09red/hsa:3553%09red/hsa:3563%09red/hsa:3554%09red/hsa:3672%09red/hsa:1438%09red/hsa:948%09red/hsa:3570%09red/hsa:3678%09red/hsa:3676%09red/hsa:3575%09red/hsa:290%09red/hsa:966%09red/hsa:912%09red/hsa:4254%09red/hsa:3815%09red/hsa:3655%09red
Complement and coagulation cascades	KEGG PATHWAY	hsa04610	17	79	0,000393047804933	0,00300628456206	ENSG00000188488|ENSG00000164220|ENSG00000159403|ENSG00000127241|ENSG00000175899|ENSG00000104368|ENSG00000085063|ENSG00000109072|ENSG00000125730|ENSG00000000971|ENSG00000197632|ENSG00000011422|ENSG00000100739|ENSG00000117525|ENSG00000106366|ENSG00000182326|ENSG00000181104	http://www.genome.jp/kegg-bin/show_pathway?hsa04610/hsa:2149%09red/hsa:5327%09red/hsa:966%09red/hsa:7448%09red/hsa:5104%09red/hsa:5329%09red/hsa:718%09red/hsa:3075%09red/hsa:5648%09red/hsa:2152%09red/hsa:2151%09red/hsa:2%09red/hsa:623%09red/hsa:716%09red/hsa:715%09red/hsa:5054%09red/hsa:5055%09red
MicroRNAs in cancer	KEGG PATHWAY	hsa05206	39	273	0,000417758356676	0,00311120039314	ENSG00000166484|ENSG00000134853|ENSG00000169946|ENSG00000138061|ENSG00000113721|ENSG00000100234|ENSG00000073756|ENSG00000007968|ENSG00000136997|ENSG00000197461|ENSG00000112715|ENSG00000153094|ENSG00000169032|ENSG00000124762|ENSG00000168610|ENSG00000168477|ENSG00000068028|ENSG00000115904|ENSG00000104081|ENSG00000026025|ENSG00000075618|ENSG00000146670|ENSG00000161638|ENSG00000012048|ENSG00000101224…	http://www.genome.jp/kegg-bin/show_pathway?hsa05206/hsa:595%09red/hsa:113130%09red/hsa:5604%09red/hsa:7431%09red/hsa:1545%09red/hsa:7078%09red/hsa:6624%09red/hsa:90427%09red/hsa:3371%09red/hsa:5743%09red/hsa:3236%09red/hsa:1870%09red/hsa:7057%09red/hsa:3065%09red/hsa:11186%09red/hsa:4853%09red/hsa:5156%09red/hsa:5154%09red/hsa:9493%09red/hsa:994%09red/hsa:672%09red/hsa:3678%09red/hsa:10018%09red/…
Mucin type O-Glycan biosynthesis	KEGG PATHWAY	hsa00512	10	31	0,000462558159191	0,00335651177054	ENSG00000110328|ENSG00000131386|ENSG00000158089|ENSG00000143641|ENSG00000115339|ENSG00000119514|ENSG00000139629|ENSG00000176928|ENSG00000187210|ENSG00000158470	http://www.genome.jp/kegg-bin/show_pathway?hsa00512/hsa:2650%09red/hsa:51301%09red/hsa:79695%09red/hsa:79623%09red/hsa:117248%09red/hsa:9334%09red/hsa:2590%09red/hsa:2591%09red/hsa:11226%09red/hsa:374378%09red
Jak-STAT signaling pathway	KEGG PATHWAY	hsa04630	26	160	0,000705735094738	0,00497292244897	ENSG00000134470|ENSG00000170581|ENSG00000022267|ENSG00000185291|ENSG00000126561|ENSG00000120833|ENSG00000113594|ENSG00000124762|ENSG00000170677|ENSG00000104998|ENSG00000168610|ENSG00000174697|ENSG00000115904|ENSG00000138356|ENSG00000123496|ENSG00000160712|ENSG00000198223|ENSG00000145675|ENSG00000128342|ENSG00000095752|ENSG00000145623|ENSG00000168685|ENSG00000164136|ENSG00000184557|ENSG00000110092…	http://www.genome.jp/kegg-bin/show_pathway?hsa04630/hsa:3601%09red/hsa:3600%09red/hsa:316%09red/hsa:3952%09red/hsa:3977%09red/hsa:3976%09red/hsa:595%09red/hsa:3563%09red/hsa:9466%09red/hsa:9180%09red/hsa:8835%09red/hsa:3598%09red/hsa:2273%09red/hsa:9306%09red/hsa:3570%09red/hsa:5295%09red/hsa:3575%09red/hsa:6654%09red/hsa:6776%09red/hsa:1026%09red/hsa:6774%09red/hsa:6773%09red/hsa:1438%09red/hsa:…
TGF-beta signaling pathway	KEGG PATHWAY	hsa04350	17	84	0,000720458729356	0,00497292244897	ENSG00000080839|ENSG00000095739|ENSG00000170365|ENSG00000163083|ENSG00000137801|ENSG00000143869|ENSG00000136997|ENSG00000156466|ENSG00000125378|ENSG00000164093|ENSG00000183691|ENSG00000105329|ENSG00000119699|ENSG00000158747|ENSG00000108854|ENSG00000125965|ENSG00000011465	http://www.genome.jp/kegg-bin/show_pathway?hsa04350/hsa:652%09red/hsa:4681%09red/hsa:9241%09red/hsa:4086%09red/hsa:64750%09red/hsa:3625%09red/hsa:151449%09red/hsa:5308%09red/hsa:7057%09red/hsa:7043%09red/hsa:392255%09red/hsa:7040%09red/hsa:8200%09red/hsa:4609%09red/hsa:5933%09red/hsa:1634%09red/hsa:25805%09red
Phospholipase D signaling pathway	KEGG PATHWAY	hsa04072	24	146	0,000963539805148	0,00649242297278	ENSG00000134853|ENSG00000157680|ENSG00000165527|ENSG00000087460|ENSG00000120899|ENSG00000145431|ENSG00000197461|ENSG00000169032|ENSG00000033327|ENSG00000026652|ENSG00000148082|ENSG00000077044|ENSG00000115904|ENSG00000116711|ENSG00000075651|ENSG00000109458|ENSG00000145675|ENSG00000079337|ENSG00000049130|ENSG00000181104|ENSG00000157404|ENSG00000113721|ENSG00000162407|ENSG00000170962	http://www.genome.jp/kegg-bin/show_pathway?hsa04072/hsa:10411%09red/hsa:9162%09red/hsa:5321%09red/hsa:56034%09red/hsa:2185%09red/hsa:2149%09red/hsa:5604%09red/hsa:2549%09red/hsa:3815%09red/hsa:382%09red/hsa:5337%09red/hsa:5156%09red/hsa:5154%09red/hsa:5295%09red/hsa:5159%09red/hsa:6654%09red/hsa:80310%09red/hsa:56895%09red/hsa:2778%09red/hsa:53358%09red/hsa:9846%09red/hsa:8527%09red/hsa:8613%09re…
Pathogenic Escherichia coli infection	KEGG PATHWAY	hsa05130	13	56	0,00101139105992	0,0066563644176	ENSG00000137267|ENSG00000196230|ENSG00000176014|ENSG00000111057|ENSG00000188229|ENSG00000167552|ENSG00000167553|ENSG00000123416|ENSG00000180353|ENSG00000163466|ENSG00000136869|ENSG00000163347|ENSG00000127824	http://www.genome.jp/kegg-bin/show_pathway?hsa05130/hsa:7280%09red/hsa:84790%09red/hsa:9076%09red/hsa:10109%09red/hsa:203068%09red/hsa:7099%09red/hsa:7277%09red/hsa:3059%09red/hsa:3875%09red/hsa:10383%09red/hsa:84617%09red/hsa:7846%09red/hsa:10376%09red
Thyroid hormone signaling pathway	KEGG PATHWAY	hsa04919	21	121	0,0010712015963	0,00679809466132	ENSG00000124151|ENSG00000151090|ENSG00000116478|ENSG00000174437|ENSG00000125378|ENSG00000091831|ENSG00000172348|ENSG00000136997|ENSG00000141027|ENSG00000110092|ENSG00000169032|ENSG00000067057|ENSG00000163399|ENSG00000108510|ENSG00000123066|ENSG00000134250|ENSG00000145675|ENSG00000147100|ENSG00000090020|ENSG00000138193|ENSG00000084676	http://www.genome.jp/kegg-bin/show_pathway?hsa04919/hsa:9611%09red/hsa:652%09red/hsa:7068%09red/hsa:4609%09red/hsa:51196%09red/hsa:8648%09red/hsa:6567%09red/hsa:595%09red/hsa:5295%09red/hsa:23389%09red/hsa:476%09red/hsa:5604%09red/hsa:3065%09red/hsa:2099%09red/hsa:9969%09red/hsa:5214%09red/hsa:8202%09red/hsa:10231%09red/hsa:488%09red/hsa:4853%09red/hsa:6548%09red
Renin secretion	KEGG PATHWAY	hsa04924	14	64	0,00108325255827	0,00679809466132	ENSG00000115252|ENSG00000159640|ENSG00000150995|ENSG00000160014|ENSG00000172572|ENSG00000061918|ENSG00000164733|ENSG00000156113|ENSG00000135744|ENSG00000154678|ENSG00000087460|ENSG00000157388|ENSG00000164116|ENSG00000151617	http://www.genome.jp/kegg-bin/show_pathway?hsa04924/hsa:3708%09red/hsa:2983%09red/hsa:5137%09red/hsa:5136%09red/hsa:5139%09red/hsa:808%09red/hsa:2778%09red/hsa:2982%09red/hsa:1909%09red/hsa:1508%09red/hsa:3778%09red/hsa:1636%09red/hsa:183%09red/hsa:776%09red
Carbon metabolism	KEGG PATHWAY	hsa01200	20	113	0,00112901218757	0,00679809466132	ENSG00000154930|ENSG00000111669|ENSG00000197894|ENSG00000141959|ENSG00000165140|ENSG00000159399|ENSG00000067057|ENSG00000109107|ENSG00000111640|ENSG00000138413|ENSG00000102144|ENSG00000173599|ENSG00000149925|ENSG00000111674|ENSG00000074800|ENSG00000119711|ENSG00000021826|ENSG00000067225|ENSG00000171314|ENSG00000105220	http://www.genome.jp/kegg-bin/show_pathway?hsa01200/hsa:2023%09red/hsa:230%09red/hsa:226%09red/hsa:2026%09red/hsa:5211%09red/hsa:3417%09red/hsa:5223%09red/hsa:7167%09red/hsa:1373%09red/hsa:2597%09red/hsa:128%09red/hsa:5214%09red/hsa:3099%09red/hsa:5230%09red/hsa:5091%09red/hsa:5315%09red/hsa:84532%09red/hsa:2821%09red/hsa:2203%09red/hsa:4329%09red
TNF signaling pathway	KEGG PATHWAY	hsa04668	20	113	0,00112901218757	0,00679809466132	ENSG00000107175|ENSG00000118503|ENSG00000090339|ENSG00000149968|ENSG00000107968|ENSG00000164136|ENSG00000182158|ENSG00000184557|ENSG00000169032|ENSG00000108984|ENSG00000125538|ENSG00000082512|ENSG00000028137|ENSG00000108691|ENSG00000073756|ENSG00000145675|ENSG00000128342|ENSG00000056558|ENSG00000101384|ENSG00000177606	http://www.genome.jp/kegg-bin/show_pathway?hsa04668/hsa:64764%09red/hsa:3600%09red/hsa:3553%09red/hsa:7128%09red/hsa:3383%09red/hsa:3976%09red/hsa:3725%09red/hsa:7133%09red/hsa:5295%09red/hsa:4314%09red/hsa:6347%09red/hsa:10488%09red/hsa:5604%09red/hsa:1326%09red/hsa:5743%09red/hsa:7188%09red/hsa:182%09red/hsa:7185%09red/hsa:9021%09red/hsa:5608%09red
Cytokine-cytokine receptor interaction	KEGG PATHWAY	hsa04060	36	265	0,00150625894076	0,00888065167158	ENSG00000134853|ENSG00000134470|ENSG00000127863|ENSG00000185291|ENSG00000105329|ENSG00000161921|ENSG00000108691|ENSG00000145623|ENSG00000145431|ENSG00000197461|ENSG00000112715|ENSG00000145824|ENSG00000049130|ENSG00000095752|ENSG00000173535|ENSG00000174697|ENSG00000173530|ENSG00000163083|ENSG00000160712|ENSG00000198223|ENSG00000125538|ENSG00000128342|ENSG00000115594|ENSG00000125965|ENSG00000168685…	http://www.genome.jp/kegg-bin/show_pathway?hsa04060/hsa:3601%09red/hsa:3600%09red/hsa:3606%09red/hsa:3977%09red/hsa:56034%09red/hsa:3563%09red/hsa:3625%09red/hsa:8200%09red/hsa:9547%09red/hsa:9180%09red/hsa:6387%09red/hsa:3952%09red/hsa:6347%09red/hsa:7133%09red/hsa:8793%09red/hsa:5156%09red/hsa:3553%09red/hsa:5154%09red/hsa:3554%09red/hsa:3570%09red/hsa:55504%09red/hsa:58191%09red/hsa:3575%09red…
Glioma	KEGG PATHWAY	hsa05214	14	67	0,00158126072126	0,00913258743094	ENSG00000007968|ENSG00000134853|ENSG00000148082|ENSG00000160014|ENSG00000115904|ENSG00000017427|ENSG00000197461|ENSG00000110092|ENSG00000169032|ENSG00000124762|ENSG00000105810|ENSG00000101412|ENSG00000145675|ENSG00000113721	http://www.genome.jp/kegg-bin/show_pathway?hsa05214/hsa:5156%09red/hsa:5154%09red/hsa:1021%09red/hsa:1026%09red/hsa:808%09red/hsa:595%09red/hsa:3479%09red/hsa:5295%09red/hsa:5159%09red/hsa:53358%09red/hsa:1870%09red/hsa:6654%09red/hsa:5604%09red/hsa:1869%09red
Amoebiasis	KEGG PATHWAY	hsa05146	18	100	0,00165344245624	0,00935848430232	ENSG00000115414|ENSG00000188153|ENSG00000007171|ENSG00000081052|ENSG00000141404|ENSG00000170542|ENSG00000021355|ENSG00000105329|ENSG00000115594|ENSG00000125538|ENSG00000136869|ENSG00000145675|ENSG00000087460|ENSG00000053747|ENSG00000164692|ENSG00000091136|ENSG00000158473|ENSG00000119699	http://www.genome.jp/kegg-bin/show_pathway?hsa05146/hsa:5272%09red/hsa:1287%09red/hsa:3553%09red/hsa:3554%09red/hsa:2774%09red/hsa:1286%09red/hsa:7099%09red/hsa:2778%09red/hsa:3912%09red/hsa:5295%09red/hsa:1992%09red/hsa:2335%09red/hsa:7043%09red/hsa:912%09red/hsa:7040%09red/hsa:4843%09red/hsa:1278%09red/hsa:3909%09red
Biosynthesis of amino acids	KEGG PATHWAY	hsa01230	15	76	0,00179268635636	0,00994765174215	ENSG00000067057|ENSG00000149925|ENSG00000109107|ENSG00000111640|ENSG00000138413|ENSG00000102144|ENSG00000173599|ENSG00000141959|ENSG00000135821|ENSG00000111674|ENSG00000074800|ENSG00000111669|ENSG00000021826|ENSG00000067225|ENSG00000171314	http://www.genome.jp/kegg-bin/show_pathway?hsa01230/hsa:2023%09red/hsa:230%09red/hsa:226%09red/hsa:2026%09red/hsa:5211%09red/hsa:3417%09red/hsa:5223%09red/hsa:7167%09red/hsa:1373%09red/hsa:2752%09red/hsa:2597%09red/hsa:5214%09red/hsa:5230%09red/hsa:5091%09red/hsa:5315%09red
Fructose and mannose metabolism	KEGG PATHWAY	hsa00051	9	33	0,00234695606621	0,0127728570526	ENSG00000114268|ENSG00000067057|ENSG00000165140|ENSG00000159399|ENSG00000149925|ENSG00000141959|ENSG00000111669|ENSG00000170525|ENSG00000109107	http://www.genome.jp/kegg-bin/show_pathway?hsa00051/hsa:230%09red/hsa:226%09red/hsa:5210%09red/hsa:5211%09red/hsa:5214%09red/hsa:3099%09red/hsa:7167%09red/hsa:5209%09red/hsa:2203%09red
Prostate cancer	KEGG PATHWAY	hsa05215	16	91	0,00357277128722	0,0190772504582	ENSG00000107175|ENSG00000134853|ENSG00000007968|ENSG00000115904|ENSG00000145431|ENSG00000017427|ENSG00000111276|ENSG00000110092|ENSG00000169032|ENSG00000124762|ENSG00000182158|ENSG00000101412|ENSG00000145675|ENSG00000170962|ENSG00000197461|ENSG00000113721	http://www.genome.jp/kegg-bin/show_pathway?hsa05215/hsa:1027%09red/hsa:5156%09red/hsa:5154%09red/hsa:64764%09red/hsa:1026%09red/hsa:56034%09red/hsa:595%09red/hsa:3479%09red/hsa:5295%09red/hsa:5159%09red/hsa:1870%09red/hsa:6654%09red/hsa:10488%09red/hsa:5604%09red/hsa:80310%09red/hsa:1869%09red
cGMP-PKG signaling pathway	KEGG PATHWAY	hsa04022	25	173	0,00364540473723	0,0191046211229	ENSG00000107175|ENSG00000065534|ENSG00000172572|ENSG00000170214|ENSG00000061918|ENSG00000213585|ENSG00000116741|ENSG00000160014|ENSG00000157388|ENSG00000150995|ENSG00000163399|ENSG00000169032|ENSG00000171873|ENSG00000072952|ENSG00000174437|ENSG00000156113|ENSG00000138735|ENSG00000145675|ENSG00000137672|ENSG00000182158|ENSG00000058668|ENSG00000164116|ENSG00000070961|ENSG00000151617|ENSG00000100678	http://www.genome.jp/kegg-bin/show_pathway?hsa04022/hsa:3708%09red/hsa:64764%09red/hsa:2983%09red/hsa:8654%09red/hsa:7416%09red/hsa:488%09red/hsa:776%09red/hsa:4638%09red/hsa:808%09red/hsa:2982%09red/hsa:5604%09red/hsa:3778%09red/hsa:6547%09red/hsa:7225%09red/hsa:5139%09red/hsa:146%09red/hsa:147%09red/hsa:5295%09red/hsa:493%09red/hsa:490%09red/hsa:476%09red/hsa:1909%09red/hsa:10488%09red/hsa:1033…
GnRH signaling pathway	KEGG PATHWAY	hsa04912	16	92	0,00392425856314	0,0201920940612	ENSG00000108984|ENSG00000120899|ENSG00000150995|ENSG00000160014|ENSG00000115904|ENSG00000166484|ENSG00000116711|ENSG00000075651|ENSG00000169032|ENSG00000113070|ENSG00000087245|ENSG00000087460|ENSG00000095015|ENSG00000157388|ENSG00000085511|ENSG00000177606	http://www.genome.jp/kegg-bin/show_pathway?hsa04912/hsa:3708%09red/hsa:5337%09red/hsa:1839%09red/hsa:4216%09red/hsa:5321%09red/hsa:4313%09red/hsa:2778%09red/hsa:3725%09red/hsa:5598%09red/hsa:6654%09red/hsa:776%09red/hsa:5604%09red/hsa:808%09red/hsa:2185%09red/hsa:4214%09red/hsa:5608%09red
Estrogen signaling pathway	KEGG PATHWAY	hsa04915	17	101	0,0040335413189	0,0203837891651	ENSG00000107175|ENSG00000150995|ENSG00000160014|ENSG00000115904|ENSG00000182158|ENSG00000091831|ENSG00000162989|ENSG00000126803|ENSG00000169032|ENSG00000113070|ENSG00000164850|ENSG00000148082|ENSG00000087245|ENSG00000145675|ENSG00000087460|ENSG00000136928|ENSG00000177606	http://www.genome.jp/kegg-bin/show_pathway?hsa04915/hsa:3708%09red/hsa:64764%09red/hsa:9568%09red/hsa:1839%09red/hsa:4313%09red/hsa:3306%09red/hsa:3725%09red/hsa:5295%09red/hsa:2099%09red/hsa:53358%09red/hsa:6654%09red/hsa:10488%09red/hsa:5604%09red/hsa:2852%09red/hsa:808%09red/hsa:3760%09red/hsa:2778%09red
Pancreatic cancer	KEGG PATHWAY	hsa05212	13	68	0,00445778677326	0,0218138567438	ENSG00000129675|ENSG00000112715|ENSG00000110092|ENSG00000075651|ENSG00000169032|ENSG00000007968|ENSG00000105810|ENSG00000101412|ENSG00000145675|ENSG00000168610|ENSG00000051180|ENSG00000105329|ENSG00000119699	http://www.genome.jp/kegg-bin/show_pathway?hsa05212/hsa:5337%09red/hsa:6774%09red/hsa:9459%09red/hsa:1021%09red/hsa:595%09red/hsa:7040%09red/hsa:5295%09red/hsa:1870%09red/hsa:5604%09red/hsa:7043%09red/hsa:7422%09red/hsa:5888%09red/hsa:1869%09red
Nitrogen metabolism	KEGG PATHWAY	hsa00910	6	17	0,00447068442098	0,0218138567438	ENSG00000185015|ENSG00000135821|ENSG00000074410|ENSG00000178538|ENSG00000107159|ENSG00000021826	http://www.genome.jp/kegg-bin/show_pathway?hsa00910/hsa:771%09red/hsa:767%09red/hsa:768%09red/hsa:1373%09red/hsa:2752%09red/hsa:377677%09red
Purine metabolism	KEGG PATHWAY	hsa00230	25	177	0,00473283927022	0,0227015849741	ENSG00000138735|ENSG00000113231|ENSG00000172572|ENSG00000061918|ENSG00000076685|ENSG00000162433|ENSG00000067225|ENSG00000160191|ENSG00000014138|ENSG00000198805|ENSG00000138185|ENSG00000128050|ENSG00000154678|ENSG00000170222|ENSG00000093072|ENSG00000198682|ENSG00000177084|ENSG00000171848|ENSG00000115252|ENSG00000164116|ENSG00000154027|ENSG00000158125|ENSG00000135318|ENSG00000133805|ENSG00000167325	http://www.genome.jp/kegg-bin/show_pathway?hsa00230/hsa:4907%09red/hsa:9060%09red/hsa:4860%09red/hsa:2983%09red/hsa:23649%09red/hsa:51816%09red/hsa:272%09red/hsa:56985%09red/hsa:8654%09red/hsa:8622%09red/hsa:5315%09red/hsa:7498%09red/hsa:5152%09red/hsa:5137%09red/hsa:5136%09red/hsa:5139%09red/hsa:10606%09red/hsa:205%09red/hsa:953%09red/hsa:2982%09red/hsa:5426%09red/hsa:22978%09red/hsa:6240%09red/…
Rheumatoid arthritis	KEGG PATHWAY	hsa05323	15	86	0,0050110733895	0,0236355628205	ENSG00000108691|ENSG00000107562|ENSG00000090339|ENSG00000149968|ENSG00000164136|ENSG00000112715|ENSG00000095752|ENSG00000196611|ENSG00000150782|ENSG00000136869|ENSG00000125538|ENSG00000105329|ENSG00000177606|ENSG00000102755|ENSG00000119699	http://www.genome.jp/kegg-bin/show_pathway?hsa05323/hsa:3589%09red/hsa:3600%09red/hsa:3553%09red/hsa:3725%09red/hsa:6387%09red/hsa:3606%09red/hsa:4312%09red/hsa:7099%09red/hsa:3383%09red/hsa:2321%09red/hsa:4314%09red/hsa:6347%09red/hsa:7043%09red/hsa:7422%09red/hsa:7040%09red
Choline metabolism in cancer	KEGG PATHWAY	hsa05231	17	104	0,00522252309985	0,024229082578	ENSG00000134853|ENSG00000170962|ENSG00000077044|ENSG00000115904|ENSG00000145431|ENSG00000197461|ENSG00000116711|ENSG00000132970|ENSG00000113721|ENSG00000075651|ENSG00000169032|ENSG00000162407|ENSG00000112290|ENSG00000145675|ENSG00000157680|ENSG00000197208|ENSG00000177606	http://www.genome.jp/kegg-bin/show_pathway?hsa05231/hsa:5337%09red/hsa:5156%09red/hsa:5154%09red/hsa:9162%09red/hsa:5321%09red/hsa:56034%09red/hsa:3725%09red/hsa:5295%09red/hsa:5159%09red/hsa:6654%09red/hsa:5604%09red/hsa:80310%09red/hsa:6583%09red/hsa:8936%09red/hsa:8527%09red/hsa:8613%09red/hsa:10810%09red
Oxytocin signaling pathway	KEGG PATHWAY	hsa04921	23	160	0,00544022064845	0,0248319748953	ENSG00000166484|ENSG00000065534|ENSG00000061918|ENSG00000110092|ENSG00000073756|ENSG00000116741|ENSG00000087460|ENSG00000157388|ENSG00000177606|ENSG00000150995|ENSG00000004660|ENSG00000169032|ENSG00000124762|ENSG00000077157|ENSG00000160014|ENSG00000075461|ENSG00000116711|ENSG00000145675|ENSG00000180914|ENSG00000183049|ENSG00000106617|ENSG00000162989|ENSG00000164116	http://www.genome.jp/kegg-bin/show_pathway?hsa04921/hsa:3708%09red/hsa:5321%09red/hsa:2983%09red/hsa:2982%09red/hsa:595%09red/hsa:3725%09red/hsa:51422%09red/hsa:4638%09red/hsa:808%09red/hsa:27092%09red/hsa:5604%09red/hsa:5021%09red/hsa:776%09red/hsa:5295%09red/hsa:5598%09red/hsa:57118%09red/hsa:1026%09red/hsa:4660%09red/hsa:2778%09red/hsa:84254%09red/hsa:5743%09red/hsa:3760%09red/hsa:5997%09red
Vascular smooth muscle contraction	KEGG PATHWAY	hsa04270	19	123	0,00561364553587	0,0248730299173	ENSG00000065675|ENSG00000065534|ENSG00000160014|ENSG00000170214|ENSG00000061918|ENSG00000116711|ENSG00000087460|ENSG00000077157|ENSG00000107796|ENSG00000169032|ENSG00000072952|ENSG00000160013|ENSG00000150995|ENSG00000164116|ENSG00000171873|ENSG00000170425|ENSG00000157388|ENSG00000156113|ENSG00000151617	http://www.genome.jp/kegg-bin/show_pathway?hsa04270/hsa:3708%09red/hsa:4638%09red/hsa:4660%09red/hsa:776%09red/hsa:2983%09red/hsa:2982%09red/hsa:5321%09red/hsa:808%09red/hsa:146%09red/hsa:147%09red/hsa:5588%09red/hsa:59%09red/hsa:10335%09red/hsa:5739%09red/hsa:5604%09red/hsa:3778%09red/hsa:136%09red/hsa:2778%09red/hsa:1909%09red
Fc gamma R-mediated phagocytosis	KEGG PATHWAY	hsa04666	16	96	0,00562499616505	0,0248730299173	ENSG00000151693|ENSG00000153317|ENSG00000163466|ENSG00000254087|ENSG00000088280|ENSG00000116711|ENSG00000132970|ENSG00000175130|ENSG00000075651|ENSG00000169032|ENSG00000165527|ENSG00000162407|ENSG00000033327|ENSG00000112290|ENSG00000145675|ENSG00000145555	http://www.genome.jp/kegg-bin/show_pathway?hsa04666/hsa:5337%09red/hsa:55616%09red/hsa:5321%09red/hsa:10109%09red/hsa:8853%09red/hsa:65108%09red/hsa:5295%09red/hsa:4651%09red/hsa:50807%09red/hsa:382%09red/hsa:5604%09red/hsa:9846%09red/hsa:8936%09red/hsa:4067%09red/hsa:8613%09red/hsa:10810%09red
cAMP signaling pathway	KEGG PATHWAY	hsa04024	27	201	0,00622509661168	0,0271031129401	ENSG00000107175|ENSG00000172572|ENSG00000106571|ENSG00000160014|ENSG00000087460|ENSG00000157388|ENSG00000169032|ENSG00000177606|ENSG00000180914|ENSG00000181072|ENSG00000163399|ENSG00000136928|ENSG00000139874|ENSG00000174437|ENSG00000090020|ENSG00000075651|ENSG00000125675|ENSG00000145675|ENSG00000176697|ENSG00000079337|ENSG00000181104|ENSG00000182158|ENSG00000058668|ENSG00000155511|ENSG00000138193…	http://www.genome.jp/kegg-bin/show_pathway?hsa04024/hsa:10411%09red/hsa:64764%09red/hsa:9568%09red/hsa:5021%09red/hsa:3725%09red/hsa:488%09red/hsa:627%09red/hsa:2149%09red/hsa:808%09red/hsa:5604%09red/hsa:6548%09red/hsa:5337%09red/hsa:776%09red/hsa:6751%09red/hsa:5139%09red/hsa:2892%09red/hsa:5295%09red/hsa:493%09red/hsa:490%09red/hsa:1129%09red/hsa:476%09red/hsa:2890%09red/hsa:51196%09red/hsa:19…
Protein digestion and absorption	KEGG PATHWAY	hsa04974	15	90	0,00719734734484	0,0308613530089	ENSG00000060718|ENSG00000106688|ENSG00000142156|ENSG00000124749|ENSG00000142173|ENSG00000081052|ENSG00000163399|ENSG00000188153|ENSG00000114270|ENSG00000080573|ENSG00000163359|ENSG00000175538|ENSG00000092068|ENSG00000164692|ENSG00000100678	http://www.genome.jp/kegg-bin/show_pathway?hsa04974/hsa:1294%09red/hsa:1287%09red/hsa:23428%09red/hsa:1292%09red/hsa:1291%09red/hsa:50509%09red/hsa:1293%09red/hsa:6505%09red/hsa:10008%09red/hsa:81578%09red/hsa:1286%09red/hsa:6547%09red/hsa:1301%09red/hsa:476%09red/hsa:1278%09red
Glutathione metabolism	KEGG PATHWAY	hsa00480	10	51	0,0102427661913	0,043264221375	ENSG00000102172|ENSG00000100031|ENSG00000143198|ENSG00000138413|ENSG00000001084|ENSG00000166825|ENSG00000134201|ENSG00000104687|ENSG00000171848|ENSG00000167325	http://www.genome.jp/kegg-bin/show_pathway?hsa00480/hsa:2729%09red/hsa:2936%09red/hsa:2678%09red/hsa:2949%09red/hsa:3417%09red/hsa:290%09red/hsa:4259%09red/hsa:6240%09red/hsa:6241%09red/hsa:6611%09red
Phagosome	KEGG PATHWAY	hsa04145	21	152	0,0112042794618	0,0466295748189	ENSG00000153246|ENSG00000159403|ENSG00000125730|ENSG00000176014|ENSG00000188229|ENSG00000127824|ENSG00000204267|ENSG00000179218|ENSG00000167552|ENSG00000161638|ENSG00000167553|ENSG00000137801|ENSG00000123416|ENSG00000082781|ENSG00000136869|ENSG00000137267|ENSG00000158270|ENSG00000135218|ENSG00000115020|ENSG00000196230|ENSG00000102879	http://www.genome.jp/kegg-bin/show_pathway?hsa04145/hsa:200576%09red/hsa:7280%09red/hsa:6891%09red/hsa:84790%09red/hsa:81035%09red/hsa:22925%09red/hsa:11151%09red/hsa:203068%09red/hsa:948%09red/hsa:7277%09red/hsa:3678%09red/hsa:811%09red/hsa:718%09red/hsa:84617%09red/hsa:7057%09red/hsa:3693%09red/hsa:10383%09red/hsa:7099%09red/hsa:7846%09red/hsa:715%09red/hsa:10376%09red
Cell adhesion molecules (CAMs)	KEGG PATHWAY	hsa04514	20	143	0,0117136122885	0,0480427866324	ENSG00000253958|ENSG00000142949|ENSG00000038427|ENSG00000120217|ENSG00000013297|ENSG00000077943|ENSG00000002586|ENSG00000154721|ENSG00000173482|ENSG00000198910|ENSG00000162631|ENSG00000169760|ENSG00000115232|ENSG00000170558|ENSG00000090339|ENSG00000163347|ENSG00000124145|ENSG00000158769|ENSG00000091409|ENSG00000149294	http://www.genome.jp/kegg-bin/show_pathway?hsa04514/hsa:58494%09red/hsa:8516%09red/hsa:3897%09red/hsa:9076%09red/hsa:6385%09red/hsa:3383%09red/hsa:4684%09red/hsa:3676%09red/hsa:5010%09red/hsa:1000%09red/hsa:29126%09red/hsa:22871%09red/hsa:5797%09red/hsa:4267%09red/hsa:137075%09red/hsa:5792%09red/hsa:22854%09red/hsa:1462%09red/hsa:50848%09red/hsa:3655%09red
Nicotinate and nicotinamide metabolism	KEGG PATHWAY	hsa00760	7	29	0,0121005052763	0,0489206141885	ENSG00000138356|ENSG00000198805|ENSG00000076685|ENSG00000105835|ENSG00000135318|ENSG00000163864|ENSG00000103485	http://www.genome.jp/kegg-bin/show_pathway?hsa00760/hsa:23475%09red/hsa:4907%09red/hsa:316%09red/hsa:4860%09red/hsa:10135%09red/hsa:22978%09red/hsa:349565%09red
AMPK signaling pathway	KEGG PATHWAY	hsa04152	18	125	0,0126871577112	0,0505699384826	ENSG00000141959|ENSG00000107175|ENSG00000114268|ENSG00000067057|ENSG00000017427|ENSG00000170525|ENSG00000165140|ENSG00000082146|ENSG00000110092|ENSG00000004660|ENSG00000145386|ENSG00000174697|ENSG00000182158|ENSG00000109819|ENSG00000106617|ENSG00000145675|ENSG00000104812|ENSG00000135218	http://www.genome.jp/kegg-bin/show_pathway?hsa04152/hsa:64764%09red/hsa:2997%09red/hsa:890%09red/hsa:3952%09red/hsa:595%09red/hsa:3479%09red/hsa:948%09red/hsa:5295%09red/hsa:55437%09red/hsa:5210%09red/hsa:51422%09red/hsa:10488%09red/hsa:10891%09red/hsa:5214%09red/hsa:84254%09red/hsa:5211%09red/hsa:5209%09red/hsa:2203%09red
ErbB signaling pathway	KEGG PATHWAY	hsa04012	14	90	0,0151766323165	0,0596525964662	ENSG00000124762|ENSG00000148082|ENSG00000114423|ENSG00000115904|ENSG00000111276|ENSG00000169032|ENSG00000113070|ENSG00000136997|ENSG00000109458|ENSG00000157168|ENSG00000145675|ENSG00000124882|ENSG00000177606|ENSG00000126561	http://www.genome.jp/kegg-bin/show_pathway?hsa04012/hsa:6776%09red/hsa:1027%09red/hsa:868%09red/hsa:1839%09red/hsa:1026%09red/hsa:3725%09red/hsa:5295%09red/hsa:53358%09red/hsa:6654%09red/hsa:5604%09red/hsa:2549%09red/hsa:4609%09red/hsa:3084%09red/hsa:2069%09red
Legionellosis	KEGG PATHWAY	hsa05134	10	55	0,0157538181009	0,0602614293947	ENSG00000156508|ENSG00000176171|ENSG00000126803|ENSG00000150782|ENSG00000125730|ENSG00000136869|ENSG00000125538|ENSG00000137752|ENSG00000099968|ENSG00000101210	http://www.genome.jp/kegg-bin/show_pathway?hsa05134/hsa:834%09red/hsa:3553%09red/hsa:23786%09red/hsa:3606%09red/hsa:1917%09red/hsa:7099%09red/hsa:3306%09red/hsa:718%09red/hsa:664%09red/hsa:1915%09red
Measles	KEGG PATHWAY	hsa05162	19	138	0,0157574055661	0,0602614293947	ENSG00000065675|ENSG00000118503|ENSG00000105810|ENSG00000114423|ENSG00000170581|ENSG00000173530|ENSG00000111276|ENSG00000115267|ENSG00000110092|ENSG00000126803|ENSG00000160710|ENSG00000173535|ENSG00000125538|ENSG00000123595|ENSG00000157601|ENSG00000136869|ENSG00000145675|ENSG00000168610|ENSG00000126561	http://www.genome.jp/kegg-bin/show_pathway?hsa05162/hsa:6776%09red/hsa:1027%09red/hsa:6774%09red/hsa:9367%09red/hsa:7128%09red/hsa:868%09red/hsa:1021%09red/hsa:64135%09red/hsa:4599%09red/hsa:595%09red/hsa:5588%09red/hsa:5295%09red/hsa:8794%09red/hsa:103%09red/hsa:3553%09red/hsa:7099%09red/hsa:8793%09red/hsa:3306%09red/hsa:6773%09red
Other types of O-glycan biosynthesis	KEGG PATHWAY	hsa00514	7	31	0,0161753997573	0,0610351750842	ENSG00000106003|ENSG00000172986|ENSG00000117411|ENSG00000073849|ENSG00000106397|ENSG00000198756|ENSG00000186866	http://www.genome.jp/kegg-bin/show_pathway?hsa00514/hsa:3955%09red/hsa:727936%09red/hsa:23127%09red/hsa:8985%09red/hsa:8704%09red/hsa:23275%09red/hsa:6480%09red
Tight junction	KEGG PATHWAY	hsa04530	19	139	0,0167586533615	0,062403932912	ENSG00000065675|ENSG00000253958|ENSG00000131558|ENSG00000088367|ENSG00000169213|ENSG00000082397|ENSG00000013297|ENSG00000146950|ENSG00000107186|ENSG00000154721|ENSG00000132849|ENSG00000180353|ENSG00000133026|ENSG00000138771|ENSG00000163558|ENSG00000073350|ENSG00000163347|ENSG00000158769|ENSG00000159023	http://www.genome.jp/kegg-bin/show_pathway?hsa04530/hsa:5584%09red/hsa:58494%09red/hsa:3993%09red/hsa:2036%09red/hsa:9076%09red/hsa:8777%09red/hsa:2035%09red/hsa:57619%09red/hsa:5588%09red/hsa:23136%09red/hsa:5010%09red/hsa:3059%09red/hsa:10207%09red/hsa:60412%09red/hsa:4628%09red/hsa:357%09red/hsa:137075%09red/hsa:5865%09red/hsa:50848%09red
Inflammatory mediator regulation of TRP channels	KEGG PATHWAY	hsa04750	15	101	0,0172631599508	0,0634477177413	ENSG00000196639|ENSG00000065675|ENSG00000150995|ENSG00000160014|ENSG00000164251|ENSG00000116711|ENSG00000017427|ENSG00000108984|ENSG00000145675|ENSG00000135914|ENSG00000125538|ENSG00000087460|ENSG00000100739|ENSG00000115594|ENSG00000104321	http://www.genome.jp/kegg-bin/show_pathway?hsa04750/hsa:3708%09red/hsa:3553%09red/hsa:3554%09red/hsa:5321%09red/hsa:808%09red/hsa:2778%09red/hsa:3479%09red/hsa:5588%09red/hsa:5295%09red/hsa:3357%09red/hsa:2150%09red/hsa:623%09red/hsa:8989%09red/hsa:3269%09red/hsa:5608%09red
Malaria	KEGG PATHWAY	hsa05144	9	48	0,0182701544024	0,0662878678957	ENSG00000108691|ENSG00000090339|ENSG00000137801|ENSG00000150782|ENSG00000136869|ENSG00000125538|ENSG00000105329|ENSG00000135218|ENSG00000119699	http://www.genome.jp/kegg-bin/show_pathway?hsa05144/hsa:3553%09red/hsa:3606%09red/hsa:7099%09red/hsa:3383%09red/hsa:948%09red/hsa:6347%09red/hsa:7057%09red/hsa:7043%09red/hsa:7040%09red
N-Glycan biosynthesis	KEGG PATHWAY	hsa00510	9	49	0,0203068351918	0,072744738725	ENSG00000117643|ENSG00000117411|ENSG00000177239|ENSG00000104723|ENSG00000073849|ENSG00000118705|ENSG00000152127|ENSG00000111885|ENSG00000033011	http://www.genome.jp/kegg-bin/show_pathway?hsa00510/hsa:6185%09red/hsa:4249%09red/hsa:8704%09red/hsa:57134%09red/hsa:4121%09red/hsa:56052%09red/hsa:7991%09red/hsa:6480%09red/hsa:11253%09red
Non-small cell lung cancer	KEGG PATHWAY	hsa05223	10	58	0,0211445633092	0,0747988927062	ENSG00000115904|ENSG00000110092|ENSG00000169032|ENSG00000007968|ENSG00000105810|ENSG00000101412|ENSG00000077092|ENSG00000145675|ENSG00000101109|ENSG00000068028	http://www.genome.jp/kegg-bin/show_pathway?hsa05223/hsa:5915%09red/hsa:1021%09red/hsa:595%09red/hsa:5295%09red/hsa:1870%09red/hsa:6654%09red/hsa:5604%09red/hsa:1869%09red/hsa:11186%09red/hsa:6789%09red
Amphetamine addiction	KEGG PATHWAY	hsa05031	11	67	0,0214561632043	0,0749641257633	ENSG00000107175|ENSG00000189221|ENSG00000160014|ENSG00000106089|ENSG00000182158|ENSG00000155511|ENSG00000125675|ENSG00000087460|ENSG00000157388|ENSG00000116478|ENSG00000177606	http://www.genome.jp/kegg-bin/show_pathway?hsa05031/hsa:64764%09red/hsa:776%09red/hsa:808%09red/hsa:2778%09red/hsa:3725%09red/hsa:2892%09red/hsa:2890%09red/hsa:10488%09red/hsa:3065%09red/hsa:6804%09red/hsa:4128%09red
Drug metabolism - cytochrome P450	KEGG PATHWAY	hsa00982	11	68	0,0233830133997	0,0806999120991	ENSG00000189221|ENSG00000007933|ENSG00000197894|ENSG00000138356|ENSG00000196616|ENSG00000184254|ENSG00000143198|ENSG00000094963|ENSG00000076258|ENSG00000010932|ENSG00000134201	http://www.genome.jp/kegg-bin/show_pathway?hsa00982/hsa:316%09red/hsa:2329%09red/hsa:2328%09red/hsa:2949%09red/hsa:2327%09red/hsa:2326%09red/hsa:4259%09red/hsa:128%09red/hsa:125%09red/hsa:4128%09red/hsa:220%09red
Renal cell carcinoma	KEGG PATHWAY	hsa05211	11	69	0,025433018426	0,0867174001754	ENSG00000134954|ENSG00000115904|ENSG00000112715|ENSG00000169032|ENSG00000143437|ENSG00000109458|ENSG00000145675|ENSG00000177606|ENSG00000105329|ENSG00000172379|ENSG00000119699	http://www.genome.jp/kegg-bin/show_pathway?hsa05211/hsa:2113%09red/hsa:405%09red/hsa:3725%09red/hsa:5295%09red/hsa:6654%09red/hsa:9915%09red/hsa:5604%09red/hsa:7043%09red/hsa:7422%09red/hsa:2549%09red/hsa:7040%09red
Lysine degradation	KEGG PATHWAY	hsa00310	9	52	0,0273923871761	0,0922862567958	ENSG00000152952|ENSG00000083444|ENSG00000109685|ENSG00000136169|ENSG00000008311|ENSG00000106397|ENSG00000198756|ENSG00000165671|ENSG00000111275	http://www.genome.jp/kegg-bin/show_pathway?hsa00310/hsa:5351%09red/hsa:5352%09red/hsa:23127%09red/hsa:8985%09red/hsa:83852%09red/hsa:64324%09red/hsa:7468%09red/hsa:10157%09red/hsa:217%09red
Long-term depression	KEGG PATHWAY	hsa04730	10	61	0,0277655502398	0,092442949622	ENSG00000150995|ENSG00000254087|ENSG00000017427|ENSG00000061918|ENSG00000116711|ENSG00000155511|ENSG00000164116|ENSG00000125675|ENSG00000087460|ENSG00000169032	http://www.genome.jp/kegg-bin/show_pathway?hsa04730/hsa:3708%09red/hsa:5321%09red/hsa:2983%09red/hsa:2982%09red/hsa:2778%09red/hsa:3479%09red/hsa:2892%09red/hsa:2890%09red/hsa:5604%09red/hsa:4067%09red
Glycosaminoglycan biosynthesis - chondroitin sulfate / dermatan sulfate	KEGG PATHWAY	hsa00532	5	20	0,0288373870219	0,0941872178314	ENSG00000171310|ENSG00000111817|ENSG00000103489|ENSG00000015532|ENSG00000147119	http://www.genome.jp/kegg-bin/show_pathway?hsa00532/hsa:29940%09red/hsa:64131%09red/hsa:56548%09red/hsa:50515%09red/hsa:64132%09red
Endocytosis	KEGG PATHWAY	hsa04144	30	264	0,0289550811001	0,0941872178314	ENSG00000134853|ENSG00000165731|ENSG00000114423|ENSG00000165527|ENSG00000088280|ENSG00000101199|ENSG00000163558|ENSG00000105329|ENSG00000107295|ENSG00000120645|ENSG00000084070|ENSG00000153071|ENSG00000153317|ENSG00000013016|ENSG00000108854|ENSG00000157404|ENSG00000126803|ENSG00000075651|ENSG00000163466|ENSG00000125637|ENSG00000198873|ENSG00000181104|ENSG00000151693|ENSG00000105974|ENSG00000070371…	http://www.genome.jp/kegg-bin/show_pathway?hsa04144/hsa:5584%09red/hsa:55616%09red/hsa:10109%09red/hsa:3815%09red/hsa:64744%09red/hsa:8218%09red/hsa:2149%09red/hsa:868%09red/hsa:22841%09red/hsa:2869%09red/hsa:8853%09red/hsa:9815%09red/hsa:382%09red/hsa:2352%09red/hsa:5337%09red/hsa:5156%09red/hsa:30845%09red/hsa:64750%09red/hsa:857%09red/hsa:55738%09red/hsa:5979%09red/hsa:50807%09red/hsa:440073%0…
Salivary secretion	KEGG PATHWAY	hsa04970	13	90	0,0303589369797	0,0974225703226	ENSG00000150995|ENSG00000160014|ENSG00000163399|ENSG00000170214|ENSG00000061918|ENSG00000058668|ENSG00000133019|ENSG00000156113|ENSG00000070961|ENSG00000171873|ENSG00000087460|ENSG00000164116|ENSG00000090020	http://www.genome.jp/kegg-bin/show_pathway?hsa04970/hsa:3708%09red/hsa:2983%09red/hsa:2982%09red/hsa:808%09red/hsa:146%09red/hsa:147%09red/hsa:493%09red/hsa:490%09red/hsa:3778%09red/hsa:6548%09red/hsa:476%09red/hsa:1131%09red/hsa:2778%09red
Hippo signaling pathway -multiple species	KEGG PATHWAY	hsa04392	6	28	0,0306381934937	0,0974225703226	ENSG00000151748|ENSG00000113645|ENSG00000187079|ENSG00000186575|ENSG00000101265|ENSG00000068028	http://www.genome.jp/kegg-bin/show_pathway?hsa04392/hsa:11186%09red/hsa:4771%09red/hsa:7003%09red/hsa:23286%09red/hsa:60485%09red/hsa:9770%09red
Bacterial invasion of epithelial cells	KEGG PATHWAY	hsa05100	12	81	0,0314652310661	0,098940671019	ENSG00000125354|ENSG00000115414|ENSG00000148082|ENSG00000114423|ENSG00000105974|ENSG00000070371|ENSG00000180353|ENSG00000161638|ENSG00000109458|ENSG00000163466|ENSG00000112290|ENSG00000145675	http://www.genome.jp/kegg-bin/show_pathway?hsa05100/hsa:868%09red/hsa:10109%09red/hsa:3678%09red/hsa:5295%09red/hsa:2335%09red/hsa:3059%09red/hsa:8218%09red/hsa:2549%09red/hsa:23157%09red/hsa:8936%09red/hsa:53358%09red/hsa:857%09red
Insulin signaling pathway	KEGG PATHWAY	hsa04910	18	141	0,0333727990676	0,10378573776	ENSG00000142949|ENSG00000160014|ENSG00000120833|ENSG00000115904|ENSG00000095637|ENSG00000106617|ENSG00000159399|ENSG00000132825|ENSG00000184557|ENSG00000169032|ENSG00000163558|ENSG00000148082|ENSG00000109819|ENSG00000165140|ENSG00000145675|ENSG00000104812|ENSG00000005249|ENSG00000114423	http://www.genome.jp/kegg-bin/show_pathway?hsa04910/hsa:5584%09red/hsa:868%09red/hsa:5509%09red/hsa:6654%09red/hsa:808%09red/hsa:8835%09red/hsa:5295%09red/hsa:5577%09red/hsa:53358%09red/hsa:51422%09red/hsa:5604%09red/hsa:10891%09red/hsa:3099%09red/hsa:10580%09red/hsa:5792%09red/hsa:2203%09red/hsa:9021%09red/hsa:2997%09red
Pentose phosphate pathway	KEGG PATHWAY	hsa00030	6	29	0,0348320771921	0,106332373106	ENSG00000141959|ENSG00000165140|ENSG00000149925|ENSG00000067057|ENSG00000105220|ENSG00000109107	http://www.genome.jp/kegg-bin/show_pathway?hsa00030/hsa:230%09red/hsa:226%09red/hsa:5211%09red/hsa:5214%09red/hsa:2821%09red/hsa:2203%09red
Wnt signaling pathway	KEGG PATHWAY	hsa04310	18	142	0,0352062031985	0,106332373106	ENSG00000104332|ENSG00000188064|ENSG00000095739|ENSG00000105989|ENSG00000145423|ENSG00000111186|ENSG00000136997|ENSG00000070018|ENSG00000110092|ENSG00000163251|ENSG00000175592|ENSG00000106483|ENSG00000162738|ENSG00000155011|ENSG00000181274|ENSG00000177606|ENSG00000076716|ENSG00000157240	http://www.genome.jp/kegg-bin/show_pathway?hsa04310/hsa:7477%09red/hsa:3725%09red/hsa:7472%09red/hsa:23401%09red/hsa:6422%09red/hsa:6423%09red/hsa:595%09red/hsa:81029%09red/hsa:57216%09red/hsa:2239%09red/hsa:6424%09red/hsa:4040%09red/hsa:4609%09red/hsa:27123%09red/hsa:8061%09red/hsa:7855%09red/hsa:8321%09red/hsa:25805%09red
Glucagon signaling pathway	KEGG PATHWAY	hsa04922	14	102	0,035391138557	0,106332373106	ENSG00000107175|ENSG00000170145|ENSG00000150995|ENSG00000160014|ENSG00000134333|ENSG00000165140|ENSG00000087460|ENSG00000182158|ENSG00000141959|ENSG00000109819|ENSG00000106617|ENSG00000104812|ENSG00000067225|ENSG00000171314	http://www.genome.jp/kegg-bin/show_pathway?hsa04922/hsa:3708%09red/hsa:64764%09red/hsa:2997%09red/hsa:5211%09red/hsa:808%09red/hsa:5223%09red/hsa:2778%09red/hsa:23235%09red/hsa:51422%09red/hsa:10488%09red/hsa:10891%09red/hsa:5315%09red/hsa:3939%09red/hsa:2203%09red
Neurotrophin signaling pathway	KEGG PATHWAY	hsa04722	16	122	0,0356946128801	0,106332373106	ENSG00000166484|ENSG00000148082|ENSG00000160014|ENSG00000071242|ENSG00000115904|ENSG00000141522|ENSG00000148053|ENSG00000134313|ENSG00000169032|ENSG00000185652|ENSG00000145675|ENSG00000176697|ENSG00000177606|ENSG00000095015|ENSG00000109458|ENSG00000090376	http://www.genome.jp/kegg-bin/show_pathway?hsa04722/hsa:4915%09red/hsa:11213%09red/hsa:6196%09red/hsa:808%09red/hsa:3725%09red/hsa:5295%09red/hsa:4908%09red/hsa:57498%09red/hsa:6654%09red/hsa:5598%09red/hsa:5604%09red/hsa:2549%09red/hsa:396%09red/hsa:53358%09red/hsa:627%09red/hsa:4214%09red
Prolactin signaling pathway	KEGG PATHWAY	hsa04917	11	74	0,0376630902696	0,111027651524	ENSG00000148082|ENSG00000091831|ENSG00000120833|ENSG00000115904|ENSG00000184557|ENSG00000110092|ENSG00000169032|ENSG00000170677|ENSG00000145675|ENSG00000168610|ENSG00000126561	http://www.genome.jp/kegg-bin/show_pathway?hsa04917/hsa:6776%09red/hsa:6774%09red/hsa:9306%09red/hsa:595%09red/hsa:5295%09red/hsa:2099%09red/hsa:53358%09red/hsa:6654%09red/hsa:5604%09red/hsa:8835%09red/hsa:9021%09red
Influenza A	KEGG PATHWAY	hsa05164	21	175	0,0387583225367	0,111997339046	ENSG00000108691|ENSG00000173535|ENSG00000135828|ENSG00000090339|ENSG00000170581|ENSG00000173530|ENSG00000115267|ENSG00000164342|ENSG00000184557|ENSG00000126803|ENSG00000169032|ENSG00000108984|ENSG00000125538|ENSG00000213585|ENSG00000150782|ENSG00000157601|ENSG00000136869|ENSG00000145675|ENSG00000137752|ENSG00000160710|ENSG00000177606	http://www.genome.jp/kegg-bin/show_pathway?hsa05164/hsa:834%09red/hsa:3553%09red/hsa:3725%09red/hsa:8793%09red/hsa:6773%09red/hsa:3606%09red/hsa:7098%09red/hsa:4599%09red/hsa:3306%09red/hsa:3383%09red/hsa:5295%09red/hsa:8794%09red/hsa:6041%09red/hsa:6347%09red/hsa:64135%09red/hsa:5604%09red/hsa:7099%09red/hsa:7416%09red/hsa:103%09red/hsa:9021%09red/hsa:5608%09red
Signaling pathways regulating pluripotency of stem cells	KEGG PATHWAY	hsa04550	18	144	0,0390931556965	0,111997339046	ENSG00000188064|ENSG00000170365|ENSG00000105989|ENSG00000017427|ENSG00000111186|ENSG00000163083|ENSG00000113594|ENSG00000163251|ENSG00000169032|ENSG00000136997|ENSG00000016082|ENSG00000136826|ENSG00000138685|ENSG00000125378|ENSG00000145675|ENSG00000128342|ENSG00000168610|ENSG00000157240	http://www.genome.jp/kegg-bin/show_pathway?hsa04550/hsa:7477%09red/hsa:652%09red/hsa:81029%09red/hsa:7472%09red/hsa:9314%09red/hsa:3977%09red/hsa:3976%09red/hsa:3479%09red/hsa:2247%09red/hsa:3625%09red/hsa:5295%09red/hsa:4086%09red/hsa:5604%09red/hsa:6774%09red/hsa:4609%09red/hsa:3670%09red/hsa:7855%09red/hsa:8321%09red
Viral carcinogenesis	KEGG PATHWAY	hsa05203	24	207	0,0391792811505	0,111997339046	ENSG00000107175|ENSG00000080839|ENSG00000170312|ENSG00000117399|ENSG00000082512|ENSG00000145386|ENSG00000067225|ENSG00000177606|ENSG00000254087|ENSG00000145604|ENSG00000111276|ENSG00000056558|ENSG00000124762|ENSG00000168610|ENSG00000126561|ENSG00000075711|ENSG00000125730|ENSG00000122877|ENSG00000145675|ENSG00000141682|ENSG00000116478|ENSG00000182158|ENSG00000110092|ENSG00000105810	http://www.genome.jp/kegg-bin/show_pathway?hsa05203/hsa:64764%09red/hsa:983%09red/hsa:595%09red/hsa:3725%09red/hsa:5366%09red/hsa:4067%09red/hsa:6502%09red/hsa:7188%09red/hsa:3065%09red/hsa:5315%09red/hsa:1959%09red/hsa:7185%09red/hsa:1027%09red/hsa:991%09red/hsa:890%09red/hsa:5295%09red/hsa:718%09red/hsa:10488%09red/hsa:1739%09red/hsa:5933%09red/hsa:6776%09red/hsa:1026%09red/hsa:6774%09red/hsa:1…
Lysosome	KEGG PATHWAY	hsa04142	16	124	0,0399655726688	0,113102570653	ENSG00000135404|ENSG00000104341|ENSG00000070371|ENSG00000150967|ENSG00000109861|ENSG00000164733|ENSG00000166340|ENSG00000141458|ENSG00000182287|ENSG00000174080|ENSG00000119655|ENSG00000101160|ENSG00000103811|ENSG00000104763|ENSG00000106367|ENSG00000165102	http://www.genome.jp/kegg-bin/show_pathway?hsa04142/hsa:4864%09red/hsa:1512%09red/hsa:55353%09red/hsa:1522%09red/hsa:1174%09red/hsa:1508%09red/hsa:967%09red/hsa:1075%09red/hsa:138050%09red/hsa:8218%09red/hsa:427%09red/hsa:1200%09red/hsa:23457%09red/hsa:8722%09red/hsa:8905%09red/hsa:10577%09red
Platelet activation	KEGG PATHWAY	hsa04611	16	125	0,0422335121104	0,118337464626	ENSG00000068831|ENSG00000065534|ENSG00000254087|ENSG00000163558|ENSG00000061918|ENSG00000116711|ENSG00000164116|ENSG00000167323|ENSG00000160013|ENSG00000150995|ENSG00000095303|ENSG00000145675|ENSG00000087460|ENSG00000171914|ENSG00000164692|ENSG00000181104	http://www.genome.jp/kegg-bin/show_pathway?hsa04611/hsa:2149%09red/hsa:4638%09red/hsa:3708%09red/hsa:5321%09red/hsa:2983%09red/hsa:2982%09red/hsa:5742%09red/hsa:2778%09red/hsa:5295%09red/hsa:5584%09red/hsa:6786%09red/hsa:83660%09red/hsa:5739%09red/hsa:10235%09red/hsa:4067%09red/hsa:1278%09red
Mismatch repair	KEGG PATHWAY	hsa03430	5	23	0,044800942262	0,124140595523	ENSG00000132646|ENSG00000049541|ENSG00000105486|ENSG00000119684|ENSG00000174371	http://www.genome.jp/kegg-bin/show_pathway?hsa03430/hsa:27030%09red/hsa:5982%09red/hsa:5111%09red/hsa:9156%09red/hsa:3978%09red
Chagas disease (American trypanosomiasis)	KEGG PATHWAY	hsa05142	14	106	0,0451819128583	0,124140595523	ENSG00000159640|ENSG00000007171|ENSG00000141404|ENSG00000108691|ENSG00000179218|ENSG00000125538|ENSG00000125730|ENSG00000136869|ENSG00000145675|ENSG00000087460|ENSG00000105329|ENSG00000177606|ENSG00000106366|ENSG00000119699	http://www.genome.jp/kegg-bin/show_pathway?hsa05142/hsa:3553%09red/hsa:2774%09red/hsa:1636%09red/hsa:7099%09red/hsa:2778%09red/hsa:3725%09red/hsa:5295%09red/hsa:811%09red/hsa:6347%09red/hsa:718%09red/hsa:7043%09red/hsa:7040%09red/hsa:4843%09red/hsa:5054%09red
Glycerolipid metabolism	KEGG PATHWAY	hsa00561	9	59	0,0502934128654	0,135552722294	ENSG00000134324|ENSG00000077044|ENSG00000100344|ENSG00000111275|ENSG00000132793|ENSG00000162407|ENSG00000157680|ENSG00000186281|ENSG00000026652	http://www.genome.jp/kegg-bin/show_pathway?hsa00561/hsa:80339%09red/hsa:56895%09red/hsa:150763%09red/hsa:8613%09red/hsa:23175%09red/hsa:9162%09red/hsa:8527%09red/hsa:64900%09red/hsa:217%09red
Acute myeloid leukemia	KEGG PATHWAY	hsa05221	9	59	0,0502934128654	0,135552722294	ENSG00000157404|ENSG00000115904|ENSG00000079102|ENSG00000110092|ENSG00000169032|ENSG00000136997|ENSG00000145675|ENSG00000168610|ENSG00000126561	http://www.genome.jp/kegg-bin/show_pathway?hsa05221/hsa:6776%09red/hsa:6774%09red/hsa:3815%09red/hsa:595%09red/hsa:5295%09red/hsa:6654%09red/hsa:5604%09red/hsa:862%09red/hsa:4609%09red
Arginine and proline metabolism	KEGG PATHWAY	hsa00330	8	50	0,0513083387953	0,136983583765	ENSG00000007171|ENSG00000189221|ENSG00000122884|ENSG00000111275|ENSG00000149380|ENSG00000130066|ENSG00000072682|ENSG00000102172	http://www.genome.jp/kegg-bin/show_pathway?hsa00330/hsa:5033%09red/hsa:283208%09red/hsa:8974%09red/hsa:6303%09red/hsa:6611%09red/hsa:4843%09red/hsa:4128%09red/hsa:217%09red
Adrenergic signaling in cardiomyocytes	KEGG PATHWAY	hsa04261	18	151	0,0551508811469	0,145866349202	ENSG00000107175|ENSG00000174437|ENSG00000075461|ENSG00000170214|ENSG00000058668|ENSG00000087460|ENSG00000182158|ENSG00000163399|ENSG00000070961|ENSG00000171873|ENSG00000145675|ENSG00000160014|ENSG00000183873|ENSG00000079337|ENSG00000143549|ENSG00000157388|ENSG00000118194|ENSG00000090020	http://www.genome.jp/kegg-bin/show_pathway?hsa04261/hsa:10411%09red/hsa:64764%09red/hsa:776%09red/hsa:7139%09red/hsa:808%09red/hsa:146%09red/hsa:147%09red/hsa:490%09red/hsa:5295%09red/hsa:493%09red/hsa:10488%09red/hsa:7170%09red/hsa:27092%09red/hsa:2778%09red/hsa:6548%09red/hsa:476%09red/hsa:488%09red/hsa:6331%09red
Oocyte meiosis	KEGG PATHWAY	hsa04114	15	120	0,0559412382079	0,145871861032	ENSG00000127564|ENSG00000166851|ENSG00000160014|ENSG00000071242|ENSG00000017427|ENSG00000157456|ENSG00000169679|ENSG00000169032|ENSG00000117399|ENSG00000150995|ENSG00000087586|ENSG00000135476|ENSG00000164611|ENSG00000170312|ENSG00000134057	http://www.genome.jp/kegg-bin/show_pathway?hsa04114/hsa:3708%09red/hsa:991%09red/hsa:983%09red/hsa:9088%09red/hsa:891%09red/hsa:6196%09red/hsa:5347%09red/hsa:9700%09red/hsa:3479%09red/hsa:699%09red/hsa:5604%09red/hsa:6790%09red/hsa:9133%09red/hsa:808%09red/hsa:9232%09red
Leishmaniasis	KEGG PATHWAY	hsa05140	10	70	0,0561838616694	0,145871861032	ENSG00000007171|ENSG00000115232|ENSG00000175130|ENSG00000073756|ENSG00000125730|ENSG00000136869|ENSG00000125538|ENSG00000105329|ENSG00000119699|ENSG00000177606	http://www.genome.jp/kegg-bin/show_pathway?hsa05140/hsa:3553%09red/hsa:65108%09red/hsa:7099%09red/hsa:3725%09red/hsa:3676%09red/hsa:718%09red/hsa:7043%09red/hsa:7040%09red/hsa:4843%09red/hsa:5743%09red
Melanogenesis	KEGG PATHWAY	hsa04916	13	100	0,0572558288877	0,147303632502	ENSG00000107175|ENSG00000188064|ENSG00000160014|ENSG00000105989|ENSG00000187098|ENSG00000111186|ENSG00000157404|ENSG00000163251|ENSG00000169032|ENSG00000182158|ENSG00000087460|ENSG00000049130|ENSG00000157240	http://www.genome.jp/kegg-bin/show_pathway?hsa04916/hsa:64764%09red/hsa:7477%09red/hsa:7472%09red/hsa:3815%09red/hsa:2778%09red/hsa:81029%09red/hsa:10488%09red/hsa:5604%09red/hsa:808%09red/hsa:7855%09red/hsa:4286%09red/hsa:8321%09red/hsa:4254%09red
Insulin resistance	KEGG PATHWAY	hsa04931	14	111	0,0599031302646	0,152133561271	ENSG00000107175|ENSG00000142949|ENSG00000071242|ENSG00000065675|ENSG00000106617|ENSG00000132825|ENSG00000184557|ENSG00000182158|ENSG00000009950|ENSG00000109819|ENSG00000145675|ENSG00000104812|ENSG00000168610|ENSG00000135218	http://www.genome.jp/kegg-bin/show_pathway?hsa04931/hsa:64764%09red/hsa:6774%09red/hsa:51085%09red/hsa:5509%09red/hsa:6196%09red/hsa:5588%09red/hsa:948%09red/hsa:5295%09red/hsa:51422%09red/hsa:10488%09red/hsa:10891%09red/hsa:5792%09red/hsa:9021%09red/hsa:2997%09red
Adipocytokine signaling pathway	KEGG PATHWAY	hsa04920	10	71	0,0602083352026	0,152133561271	ENSG00000065675|ENSG00000174697|ENSG00000106617|ENSG00000184557|ENSG00000004660|ENSG00000028137|ENSG00000109819|ENSG00000168610|ENSG00000130377|ENSG00000135218	http://www.genome.jp/kegg-bin/show_pathway?hsa04920/hsa:6774%09red/hsa:3952%09red/hsa:5588%09red/hsa:7133%09red/hsa:81616%09red/hsa:948%09red/hsa:51422%09red/hsa:84254%09red/hsa:10891%09red/hsa:9021%09red
mTOR signaling pathway	KEGG PATHWAY	hsa04150	18	155	0,0661536542151	0,165676850822	ENSG00000188064|ENSG00000115904|ENSG00000105989|ENSG00000103257|ENSG00000017427|ENSG00000145604|ENSG00000070018|ENSG00000063046|ENSG00000163251|ENSG00000169032|ENSG00000082146|ENSG00000111186|ENSG00000134324|ENSG00000145675|ENSG00000071242|ENSG00000118515|ENSG00000083290|ENSG00000157240	http://www.genome.jp/kegg-bin/show_pathway?hsa04150/hsa:7477%09red/hsa:81029%09red/hsa:7472%09red/hsa:5295%09red/hsa:6196%09red/hsa:9706%09red/hsa:3479%09red/hsa:1975%09red/hsa:23175%09red/hsa:6502%09red/hsa:6654%09red/hsa:4040%09red/hsa:5604%09red/hsa:7855%09red/hsa:8321%09red/hsa:55437%09red/hsa:6446%09red/hsa:8140%09red
Prion diseases	KEGG PATHWAY	hsa05020	6	35	0,0675855715689	0,166840302661	ENSG00000044574|ENSG00000120738|ENSG00000169032|ENSG00000149294|ENSG00000125538|ENSG00000168439	http://www.genome.jp/kegg-bin/show_pathway?hsa05020/hsa:3553%09red/hsa:3309%09red/hsa:4684%09red/hsa:5604%09red/hsa:1958%09red/hsa:10963%09red
Inflammatory bowel disease (IBD)	KEGG PATHWAY	hsa05321	9	63	0,0677972961342	0,166840302661	ENSG00000178573|ENSG00000150782|ENSG00000136869|ENSG00000125538|ENSG00000168610|ENSG00000177606|ENSG00000069667|ENSG00000105329|ENSG00000119699	http://www.genome.jp/kegg-bin/show_pathway?hsa05321/hsa:6774%09red/hsa:3606%09red/hsa:7099%09red/hsa:3725%09red/hsa:3553%09red/hsa:6095%09red/hsa:7043%09red/hsa:4094%09red/hsa:7040%09red
Glutamatergic synapse	KEGG PATHWAY	hsa04724	14	115	0,073787871017	0,180016961188	ENSG00000164418|ENSG00000106688|ENSG00000150995|ENSG00000111371|ENSG00000162105|ENSG00000116711|ENSG00000155511|ENSG00000162989|ENSG00000075651|ENSG00000135821|ENSG00000171189|ENSG00000125675|ENSG00000087460|ENSG00000157388	http://www.genome.jp/kegg-bin/show_pathway?hsa04724/hsa:3708%09red/hsa:5337%09red/hsa:776%09red/hsa:22941%09red/hsa:6505%09red/hsa:2778%09red/hsa:2898%09red/hsa:2892%09red/hsa:2752%09red/hsa:2890%09red/hsa:2897%09red/hsa:81539%09red/hsa:3760%09red/hsa:5321%09red
Glycosaminoglycan degradation	KEGG PATHWAY	hsa00531	4	19	0,0759447019171	0,183695304637	ENSG00000173083|ENSG00000186792|ENSG00000172987|ENSG00000165102	http://www.genome.jp/kegg-bin/show_pathway?hsa00531/hsa:60495%09red/hsa:10855%09red/hsa:8372%09red/hsa:138050%09red
Pertussis	KEGG PATHWAY	hsa05133	10	75	0,0781453927071	0,187416492679	ENSG00000007171|ENSG00000160014|ENSG00000161638|ENSG00000137752|ENSG00000125730|ENSG00000136869|ENSG00000125538|ENSG00000159403|ENSG00000182326|ENSG00000177606	http://www.genome.jp/kegg-bin/show_pathway?hsa05133/hsa:834%09red/hsa:3553%09red/hsa:7099%09red/hsa:3725%09red/hsa:3678%09red/hsa:718%09red/hsa:808%09red/hsa:4843%09red/hsa:715%09red/hsa:716%09red
Glycerophospholipid metabolism	KEGG PATHWAY	hsa00564	12	96	0,081032610589	0,191304388609	ENSG00000134324|ENSG00000186281|ENSG00000116711|ENSG00000132793|ENSG00000075651|ENSG00000176485|ENSG00000101290|ENSG00000162407|ENSG00000170222|ENSG00000077044|ENSG00000157680|ENSG00000026652	http://www.genome.jp/kegg-bin/show_pathway?hsa00564/hsa:5337%09red/hsa:8760%09red/hsa:9162%09red/hsa:5321%09red/hsa:56895%09red/hsa:150763%09red/hsa:8613%09red/hsa:23175%09red/hsa:56985%09red/hsa:8527%09red/hsa:64900%09red/hsa:11145%09red
Dorso-ventral axis formation	KEGG PATHWAY	hsa04320	5	28	0,0811184686683	0,191304388609	ENSG00000134954|ENSG00000010030|ENSG00000134250|ENSG00000115904|ENSG00000169032	http://www.genome.jp/kegg-bin/show_pathway?hsa04320/hsa:51513%09red/hsa:2113%09red/hsa:5604%09red/hsa:4853%09red/hsa:6654%09red
Fanconi anemia pathway	KEGG PATHWAY	hsa03460	8	56	0,082129806945	0,192088722028	ENSG00000221829|ENSG00000051180|ENSG00000009413|ENSG00000012048|ENSG00000140525|ENSG00000197299|ENSG00000187741|ENSG00000077152	http://www.genome.jp/kegg-bin/show_pathway?hsa03460/hsa:641%09red/hsa:29089%09red/hsa:672%09red/hsa:2189%09red/hsa:2175%09red/hsa:5980%09red/hsa:5888%09red/hsa:55215%09red
Platinum drug resistance	KEGG PATHWAY	hsa01524	10	76	0,0830948304329	0,192281795425	ENSG00000009413|ENSG00000124762|ENSG00000012048|ENSG00000143198|ENSG00000131747|ENSG00000089685|ENSG00000145675|ENSG00000134201|ENSG00000141682|ENSG00000015475	http://www.genome.jp/kegg-bin/show_pathway?hsa01524/hsa:1026%09red/hsa:637%09red/hsa:672%09red/hsa:7153%09red/hsa:5295%09red/hsa:5366%09red/hsa:2949%09red/hsa:4259%09red/hsa:5980%09red/hsa:332%09red
Pyrimidine metabolism	KEGG PATHWAY	hsa00240	13	107	0,0835712397076	0,192281795425	ENSG00000134326|ENSG00000014138|ENSG00000198805|ENSG00000138185|ENSG00000176890|ENSG00000198431|ENSG00000167900|ENSG00000177084|ENSG00000076685|ENSG00000171848|ENSG00000168393|ENSG00000135318|ENSG00000167325	http://www.genome.jp/kegg-bin/show_pathway?hsa00240/hsa:7083%09red/hsa:4907%09red/hsa:953%09red/hsa:7298%09red/hsa:23649%09red/hsa:1841%09red/hsa:5426%09red/hsa:6241%09red/hsa:7296%09red/hsa:22978%09red/hsa:6240%09red/hsa:129607%09red/hsa:4860%09red
Progesterone-mediated oocyte maturation	KEGG PATHWAY	hsa04914	12	97	0,0854824212143	0,195092945191	ENSG00000127564|ENSG00000166851|ENSG00000170312|ENSG00000071242|ENSG00000017427|ENSG00000157456|ENSG00000169679|ENSG00000169032|ENSG00000101224|ENSG00000145675|ENSG00000145386|ENSG00000134057	http://www.genome.jp/kegg-bin/show_pathway?hsa04914/hsa:983%09red/hsa:9088%09red/hsa:890%09red/hsa:994%09red/hsa:6196%09red/hsa:5347%09red/hsa:3479%09red/hsa:699%09red/hsa:5295%09red/hsa:5604%09red/hsa:9133%09red/hsa:891%09red
Thyroid cancer	KEGG PATHWAY	hsa05216	5	29	0,0898219643881	0,203356927375	ENSG00000136997|ENSG00000165731|ENSG00000143549|ENSG00000110092|ENSG00000169032	http://www.genome.jp/kegg-bin/show_pathway?hsa05216/hsa:4609%09red/hsa:595%09red/hsa:7170%09red/hsa:5979%09red/hsa:5604%09red
Neuroactive ligand-receptor interaction	KEGG PATHWAY	hsa04080	28	278	0,100552797624	0,225844775616	ENSG00000151090|ENSG00000164418|ENSG00000170214|ENSG00000171509|ENSG00000166206|ENSG00000160013|ENSG00000138435|ENSG00000170425|ENSG00000164220|ENSG00000181072|ENSG00000136928|ENSG00000171873|ENSG00000139874|ENSG00000196639|ENSG00000135914|ENSG00000174697|ENSG00000133019|ENSG00000170989|ENSG00000171189|ENSG00000125675|ENSG00000180914|ENSG00000182771|ENSG00000181104|ENSG00000186297|ENSG00000164251…	http://www.genome.jp/kegg-bin/show_pathway?hsa04080/hsa:9568%09red/hsa:3952%09red/hsa:5021%09red/hsa:1134%09red/hsa:623%09red/hsa:1131%09red/hsa:2562%09red/hsa:2149%09red/hsa:5739%09red/hsa:3357%09red/hsa:2894%09red/hsa:59350%09red/hsa:2898%09red/hsa:2897%09red/hsa:146%09red/hsa:147%09red/hsa:2892%09red/hsa:2890%09red/hsa:1129%09red/hsa:7068%09red/hsa:6751%09red/hsa:1909%09red/hsa:1901%09red/hsa:…
Type II diabetes mellitus	KEGG PATHWAY	hsa04930	7	50	0,10738753459	0,238213928674	ENSG00000120833|ENSG00000159399|ENSG00000184557|ENSG00000006283|ENSG00000145675|ENSG00000157388|ENSG00000067225	http://www.genome.jp/kegg-bin/show_pathway?hsa04930/hsa:776%09red/hsa:8835%09red/hsa:5295%09red/hsa:3099%09red/hsa:5315%09red/hsa:8913%09red/hsa:9021%09red
Protein processing in endoplasmic reticulum	KEGG PATHWAY	hsa04141	18	167	0,107743402369	0,238213928674	ENSG00000125844|ENSG00000117643|ENSG00000044574|ENSG00000185624|ENSG00000130939|ENSG00000177239|ENSG00000120725|ENSG00000179218|ENSG00000104723|ENSG00000126803|ENSG00000143870|ENSG00000118705|ENSG00000136026|ENSG00000163479|ENSG00000155660|ENSG00000145495|ENSG00000111885|ENSG00000101310	http://www.genome.jp/kegg-bin/show_pathway?hsa04141/hsa:6746%09red/hsa:9601%09red/hsa:6185%09red/hsa:3309%09red/hsa:10277%09red/hsa:6238%09red/hsa:3306%09red/hsa:5034%09red/hsa:10299%09red/hsa:811%09red/hsa:57134%09red/hsa:4121%09red/hsa:7991%09red/hsa:10483%09red/hsa:64374%09red/hsa:10130%09red/hsa:10970%09red/hsa:11253%09red
Galactose metabolism	KEGG PATHWAY	hsa00052	5	31	0,108601228493	0,238249206693	ENSG00000141959|ENSG00000159399|ENSG00000067057|ENSG00000117308|ENSG00000117411	http://www.genome.jp/kegg-bin/show_pathway?hsa00052/hsa:8704%09red/hsa:2582%09red/hsa:5214%09red/hsa:3099%09red/hsa:5211%09red
Serotonergic synapse	KEGG PATHWAY	hsa04726	13	113	0,111363237682	0,242429202032	ENSG00000189221|ENSG00000073756|ENSG00000079337|ENSG00000116711|ENSG00000166206|ENSG00000162989|ENSG00000150995|ENSG00000095303|ENSG00000135914|ENSG00000087460|ENSG00000157388|ENSG00000169032|ENSG00000080709	http://www.genome.jp/kegg-bin/show_pathway?hsa04726/hsa:3708%09red/hsa:10411%09red/hsa:2562%09red/hsa:5742%09red/hsa:5743%09red/hsa:2778%09red/hsa:3781%09red/hsa:5604%09red/hsa:3357%09red/hsa:5321%09red/hsa:3760%09red/hsa:4128%09red/hsa:776%09red
Propanoate metabolism	KEGG PATHWAY	hsa00640	5	32	0,118650791108	0,255563277828	ENSG00000111058|ENSG00000154930|ENSG00000119711|ENSG00000134333|ENSG00000137992	http://www.genome.jp/kegg-bin/show_pathway?hsa00640/hsa:1629%09red/hsa:84532%09red/hsa:3939%09red/hsa:79611%09red/hsa:4329%09red
NF-kappa B signaling pathway	KEGG PATHWAY	hsa04064	11	93	0,119202659623	0,255563277828	ENSG00000065675|ENSG00000118503|ENSG00000090339|ENSG00000254087|ENSG00000107562|ENSG00000056558|ENSG00000082512|ENSG00000073756|ENSG00000136869|ENSG00000125538|ENSG00000115594	http://www.genome.jp/kegg-bin/show_pathway?hsa04064/hsa:3553%09red/hsa:7128%09red/hsa:3554%09red/hsa:3383%09red/hsa:7099%09red/hsa:5588%09red/hsa:7188%09red/hsa:5743%09red/hsa:6387%09red/hsa:4067%09red/hsa:7185%09red
Biosynthesis of unsaturated fatty acids	KEGG PATHWAY	hsa01040	4	23	0,120846098484	0,257138690759	ENSG00000206527|ENSG00000188921|ENSG00000134824|ENSG00000149485	http://www.genome.jp/kegg-bin/show_pathway?hsa01040/hsa:201562%09red/hsa:9415%09red/hsa:3992%09red/hsa:401494%09red
Circadian entrainment	KEGG PATHWAY	hsa04713	11	95	0,13121199762	0,277111905421	ENSG00000150995|ENSG00000160014|ENSG00000061918|ENSG00000155511|ENSG00000006283|ENSG00000164116|ENSG00000198929|ENSG00000162989|ENSG00000125675|ENSG00000087460|ENSG00000157388	http://www.genome.jp/kegg-bin/show_pathway?hsa04713/hsa:3708%09red/hsa:776%09red/hsa:2983%09red/hsa:2982%09red/hsa:808%09red/hsa:2778%09red/hsa:2892%09red/hsa:2890%09red/hsa:9722%09red/hsa:3760%09red/hsa:8913%09red
Renin-angiotensin system	KEGG PATHWAY	hsa04614	4	24	0,133520291188	0,277840017692	ENSG00000159640|ENSG00000166825|ENSG00000138792|ENSG00000135744	http://www.genome.jp/kegg-bin/show_pathway?hsa04614/hsa:290%09red/hsa:1636%09red/hsa:2028%09red/hsa:183%09red
Histidine metabolism	KEGG PATHWAY	hsa00340	4	24	0,133520291188	0,277840017692	ENSG00000184254|ENSG00000150540|ENSG00000189221|ENSG00000111275	http://www.genome.jp/kegg-bin/show_pathway?hsa00340/hsa:3176%09red/hsa:217%09red/hsa:4128%09red/hsa:220%09red
Colorectal cancer	KEGG PATHWAY	hsa05210	8	64	0,137010889155	0,280971606021	ENSG00000110092|ENSG00000169032|ENSG00000136997|ENSG00000089685|ENSG00000145675|ENSG00000105329|ENSG00000119699|ENSG00000177606	http://www.genome.jp/kegg-bin/show_pathway?hsa05210/hsa:4609%09red/hsa:595%09red/hsa:3725%09red/hsa:5295%09red/hsa:5604%09red/hsa:7043%09red/hsa:7040%09red/hsa:332%09red
Arachidonic acid metabolism	KEGG PATHWAY	hsa00590	8	64	0,137010889155	0,280971606021	ENSG00000124212|ENSG00000100031|ENSG00000148344|ENSG00000116711|ENSG00000196139|ENSG00000095303|ENSG00000073756|ENSG00000176485	http://www.genome.jp/kegg-bin/show_pathway?hsa00590/hsa:2678%09red/hsa:8644%09red/hsa:5321%09red/hsa:5742%09red/hsa:5743%09red/hsa:5740%09red/hsa:9536%09red/hsa:11145%09red
African trypanosomiasis	KEGG PATHWAY	hsa05143	5	34	0,139991490818	0,285018646773	ENSG00000125538|ENSG00000100342|ENSG00000090339|ENSG00000150782|ENSG00000164251	http://www.genome.jp/kegg-bin/show_pathway?hsa05143/hsa:8542%09red/hsa:3553%09red/hsa:3383%09red/hsa:2150%09red/hsa:3606%09red
ABC transporters	KEGG PATHWAY	hsa02010	6	44	0,141229369929	0,2854850835	ENSG00000165029|ENSG00000141338|ENSG00000150967|ENSG00000005471|ENSG00000114770|ENSG00000204267	http://www.genome.jp/kegg-bin/show_pathway?hsa02010/hsa:6891%09red/hsa:10351%09red/hsa:5244%09red/hsa:19%09red/hsa:10057%09red/hsa:23457%09red
Salmonella infection	KEGG PATHWAY	hsa05132	10	86	0,142750834355	0,286514085975	ENSG00000007171|ENSG00000133026|ENSG00000112290|ENSG00000150782|ENSG00000163466|ENSG00000136869|ENSG00000125538|ENSG00000137752|ENSG00000070087|ENSG00000177606	http://www.genome.jp/kegg-bin/show_pathway?hsa05132/hsa:834%09red/hsa:3553%09red/hsa:10109%09red/hsa:3606%09red/hsa:7099%09red/hsa:3725%09red/hsa:5217%09red/hsa:8936%09red/hsa:4843%09red/hsa:4628%09red
Glycosaminoglycan biosynthesis - heparan sulfate / heparin	KEGG PATHWAY	hsa00534	4	25	0,146709190991	0,292385218665	ENSG00000158008|ENSG00000151348|ENSG00000103489|ENSG00000015532	http://www.genome.jp/kegg-bin/show_pathway?hsa00534/hsa:2134%09red/hsa:64131%09red/hsa:2132%09red/hsa:64132%09red
Basal cell carcinoma	KEGG PATHWAY	hsa05217	7	55	0,148608481096	0,292477931991	ENSG00000188064|ENSG00000105989|ENSG00000111186|ENSG00000106571|ENSG00000163251|ENSG00000125378|ENSG00000157240	http://www.genome.jp/kegg-bin/show_pathway?hsa05217/hsa:7477%09red/hsa:652%09red/hsa:7472%09red/hsa:81029%09red/hsa:2737%09red/hsa:7855%09red/hsa:8321%09red
Insulin secretion	KEGG PATHWAY	hsa04911	10	87	0,149697781014	0,292477931991	ENSG00000107175|ENSG00000182158|ENSG00000132639|ENSG00000163399|ENSG00000133019|ENSG00000156113|ENSG00000106089|ENSG00000087460|ENSG00000157388|ENSG00000080709	http://www.genome.jp/kegg-bin/show_pathway?hsa04911/hsa:64764%09red/hsa:776%09red/hsa:6804%09red/hsa:2778%09red/hsa:3781%09red/hsa:10488%09red/hsa:3778%09red/hsa:476%09red/hsa:1131%09red/hsa:6616%09red
Leukocyte transendothelial migration	KEGG PATHWAY	hsa04670	13	120	0,149856184236	0,292477931991	ENSG00000253958|ENSG00000090339|ENSG00000013297|ENSG00000107562|ENSG00000002586|ENSG00000154721|ENSG00000087245|ENSG00000115232|ENSG00000145675|ENSG00000163347|ENSG00000079337|ENSG00000158769|ENSG00000120899	http://www.genome.jp/kegg-bin/show_pathway?hsa04670/hsa:10411%09red/hsa:58494%09red/hsa:3676%09red/hsa:6387%09red/hsa:9076%09red/hsa:3383%09red/hsa:4313%09red/hsa:5295%09red/hsa:5010%09red/hsa:137075%09red/hsa:2185%09red/hsa:4267%09red/hsa:50848%09red
Tyrosine metabolism	KEGG PATHWAY	hsa00350	5	35	0,151246919534	0,293170398822	ENSG00000184254|ENSG00000138356|ENSG00000189221|ENSG00000197894|ENSG00000196616	http://www.genome.jp/kegg-bin/show_pathway?hsa00350/hsa:125%09red/hsa:128%09red/hsa:316%09red/hsa:4128%09red/hsa:220%09red
Nucleotide excision repair	KEGG PATHWAY	hsa03420	6	46	0,161235785855	0,310406308823	ENSG00000132646|ENSG00000158290|ENSG00000105486|ENSG00000177084|ENSG00000049541|ENSG00000154767	http://www.genome.jp/kegg-bin/show_pathway?hsa03420/hsa:3978%09red/hsa:5426%09red/hsa:5111%09red/hsa:7508%09red/hsa:5982%09red/hsa:8450%09red
Phosphatidylinositol signaling system	KEGG PATHWAY	hsa04070	11	101	0,170953373785	0,325952010193	ENSG00000150995|ENSG00000077044|ENSG00000138193|ENSG00000127080|ENSG00000101290|ENSG00000143772|ENSG00000145675|ENSG00000160014|ENSG00000078269|ENSG00000157680|ENSG00000115020	http://www.genome.jp/kegg-bin/show_pathway?hsa04070/hsa:3708%09red/hsa:51196%09red/hsa:8760%09red/hsa:9162%09red/hsa:808%09red/hsa:64768%09red/hsa:5295%09red/hsa:3707%09red/hsa:8871%09red/hsa:200576%09red/hsa:8527%09red
Epstein-Barr virus infection	KEGG PATHWAY	hsa05169	20	204	0,171614309254	0,325952010193	ENSG00000124762|ENSG00000118503|ENSG00000116478|ENSG00000090339|ENSG00000254087|ENSG00000136997|ENSG00000145604|ENSG00000026025|ENSG00000138185|ENSG00000126803|ENSG00000056558|ENSG00000108984|ENSG00000082512|ENSG00000145675|ENSG00000170312|ENSG00000168610|ENSG00000145386|ENSG00000111276|ENSG00000132341|ENSG00000177606	http://www.genome.jp/kegg-bin/show_pathway?hsa05169/hsa:1027%09red/hsa:1026%09red/hsa:6774%09red/hsa:983%09red/hsa:953%09red/hsa:890%09red/hsa:3383%09red/hsa:3306%09red/hsa:3725%09red/hsa:5295%09red/hsa:7185%09red/hsa:6502%09red/hsa:7188%09red/hsa:7431%09red/hsa:3065%09red/hsa:4609%09red/hsa:7128%09red/hsa:4067%09red/hsa:5901%09red/hsa:5608%09red
Morphine addiction	KEGG PATHWAY	hsa05032	10	91	0,179128856289	0,337956442199	ENSG00000115252|ENSG00000113231|ENSG00000186297|ENSG00000172572|ENSG00000166206|ENSG00000136928|ENSG00000162989|ENSG00000154678|ENSG00000087460|ENSG00000198873	http://www.genome.jp/kegg-bin/show_pathway?hsa05032/hsa:9568%09red/hsa:2562%09red/hsa:5137%09red/hsa:5136%09red/hsa:5139%09red/hsa:2778%09red/hsa:2869%09red/hsa:8622%09red/hsa:2558%09red/hsa:3760%09red
Amino sugar and nucleotide sugar metabolism	KEGG PATHWAY	hsa00520	6	48	0,182377335249	0,339557801813	ENSG00000159399|ENSG00000105220|ENSG00000166394|ENSG00000117143|ENSG00000115652|ENSG00000117308	http://www.genome.jp/kegg-bin/show_pathway?hsa00520/hsa:51700%09red/hsa:2582%09red/hsa:3099%09red/hsa:6675%09red/hsa:2821%09red/hsa:80146%09red
Notch signaling pathway	KEGG PATHWAY	hsa04330	6	48	0,182377335249	0,339557801813	ENSG00000106003|ENSG00000134250|ENSG00000110042|ENSG00000163840|ENSG00000116478|ENSG00000101384	http://www.genome.jp/kegg-bin/show_pathway?hsa04330/hsa:3955%09red/hsa:151636%09red/hsa:23220%09red/hsa:3065%09red/hsa:182%09red/hsa:4853%09red
Cocaine addiction	KEGG PATHWAY	hsa05030	6	49	0,1933395007	0,357614893451	ENSG00000182158|ENSG00000189221|ENSG00000107175|ENSG00000087460|ENSG00000176697|ENSG00000177606	http://www.genome.jp/kegg-bin/show_pathway?hsa05030/hsa:64764%09red/hsa:2778%09red/hsa:3725%09red/hsa:10488%09red/hsa:4128%09red/hsa:627%09red
Thyroid hormone synthesis	KEGG PATHWAY	hsa04918	8	71	0,196797524709	0,359314190276	ENSG00000107175|ENSG00000150995|ENSG00000044574|ENSG00000182158|ENSG00000163399|ENSG00000104687|ENSG00000087460|ENSG00000155660	http://www.genome.jp/kegg-bin/show_pathway?hsa04918/hsa:3708%09red/hsa:64764%09red/hsa:2936%09red/hsa:3309%09red/hsa:2778%09red/hsa:9601%09red/hsa:10488%09red/hsa:476%09red
Antigen processing and presentation	KEGG PATHWAY	hsa04612	8	71	0,196797524709	0,359314190276	ENSG00000120837|ENSG00000044574|ENSG00000134539|ENSG00000179218|ENSG00000164733|ENSG00000092010|ENSG00000126803|ENSG00000204267	http://www.genome.jp/kegg-bin/show_pathway?hsa04612/hsa:3824%09red/hsa:6891%09red/hsa:3309%09red/hsa:1508%09red/hsa:3306%09red/hsa:4801%09red/hsa:5720%09red/hsa:811%09red
Pyruvate metabolism	KEGG PATHWAY	hsa00620	5	40	0,212562184995	0,385609604831	ENSG00000173599|ENSG00000154930|ENSG00000111275|ENSG00000067225|ENSG00000134333	http://www.genome.jp/kegg-bin/show_pathway?hsa00620/hsa:5315%09red/hsa:84532%09red/hsa:3939%09red/hsa:217%09red/hsa:5091%09red
Natural killer cell mediated cytotoxicity	KEGG PATHWAY	hsa04650	13	130	0,215281225907	0,386150093665	ENSG00000204516|ENSG00000173535|ENSG00000148082|ENSG00000090339|ENSG00000115904|ENSG00000134539|ENSG00000173530|ENSG00000169032|ENSG00000111981|ENSG00000145675|ENSG00000204520|ENSG00000015475|ENSG00000120899	http://www.genome.jp/kegg-bin/show_pathway?hsa04650/hsa:637%09red/hsa:3824%09red/hsa:3383%09red/hsa:8793%09red/hsa:80329%09red/hsa:5295%09red/hsa:8794%09red/hsa:53358%09red/hsa:6654%09red/hsa:5604%09red/hsa:4277%09red/hsa:2185%09red/hsa:100507436%09red
PPAR signaling pathway	KEGG PATHWAY	hsa03320	8	73	0,21558909823	0,386150093665	ENSG00000135218|ENSG00000167772|ENSG00000196611|ENSG00000147872|ENSG00000095637|ENSG00000168306|ENSG00000130377|ENSG00000134824	http://www.genome.jp/kegg-bin/show_pathway?hsa03320/hsa:10580%09red/hsa:4312%09red/hsa:81616%09red/hsa:948%09red/hsa:51129%09red/hsa:8309%09red/hsa:123%09red/hsa:9415%09red
Circadian rhythm	KEGG PATHWAY	hsa04710	4	30	0,219089880081	0,38788996708	ENSG00000106617|ENSG00000134107|ENSG00000069667|ENSG00000170485	http://www.genome.jp/kegg-bin/show_pathway?hsa04710/hsa:51422%09red/hsa:8553%09red/hsa:4862%09red/hsa:6095%09red
Pancreatic secretion	KEGG PATHWAY	hsa04972	10	96	0,219301748173	0,38788996708	ENSG00000150995|ENSG00000174437|ENSG00000090020|ENSG00000163399|ENSG00000041353|ENSG00000058668|ENSG00000133019|ENSG00000156113|ENSG00000070961|ENSG00000087460	http://www.genome.jp/kegg-bin/show_pathway?hsa04972/hsa:3708%09red/hsa:2778%09red/hsa:493%09red/hsa:490%09red/hsa:3778%09red/hsa:5874%09red/hsa:6548%09red/hsa:476%09red/hsa:1131%09red/hsa:488%09red
Gastric acid secretion	KEGG PATHWAY	hsa04971	8	74	0,225231042482	0,392773368466	ENSG00000150995|ENSG00000160014|ENSG00000090020|ENSG00000163399|ENSG00000133019|ENSG00000082482|ENSG00000065534|ENSG00000087460	http://www.genome.jp/kegg-bin/show_pathway?hsa04971/hsa:3708%09red/hsa:4638%09red/hsa:808%09red/hsa:2778%09red/hsa:6548%09red/hsa:476%09red/hsa:3776%09red/hsa:1131%09red
Staphylococcus aureus infection	KEGG PATHWAY	hsa05150	6	52	0,227614248864	0,392773368466	ENSG00000182326|ENSG00000127241|ENSG00000090339|ENSG00000125730|ENSG00000000971|ENSG00000159403	http://www.genome.jp/kegg-bin/show_pathway?hsa05150/hsa:3383%09red/hsa:718%09red/hsa:5648%09red/hsa:3075%09red/hsa:715%09red/hsa:716%09red
Mineral absorption	KEGG PATHWAY	hsa04978	6	52	0,227614248864	0,392773368466	ENSG00000089472|ENSG00000071967|ENSG00000163399|ENSG00000070961|ENSG00000125148|ENSG00000138449	http://www.genome.jp/kegg-bin/show_pathway?hsa04978/hsa:9843%09red/hsa:79901%09red/hsa:490%09red/hsa:30061%09red/hsa:4502%09red/hsa:476%09red
Ovarian steroidogenesis	KEGG PATHWAY	hsa04913	6	52	0,227614248864	0,392773368466	ENSG00000017427|ENSG00000138061|ENSG00000116711|ENSG00000196139|ENSG00000073756|ENSG00000087460	http://www.genome.jp/kegg-bin/show_pathway?hsa04913/hsa:8644%09red/hsa:5321%09red/hsa:5743%09red/hsa:2778%09red/hsa:3479%09red/hsa:1545%09red
beta-Alanine metabolism	KEGG PATHWAY	hsa00410	4	31	0,234587032919	0,402352304946	ENSG00000184254|ENSG00000111275|ENSG00000119711|ENSG00000102172	http://www.genome.jp/kegg-bin/show_pathway?hsa00410/hsa:6611%09red/hsa:220%09red/hsa:4329%09red/hsa:217%09red
Osteoclast differentiation	KEGG PATHWAY	hsa04380	13	133	0,236994798424	0,404033300928	ENSG00000170581|ENSG00000187098|ENSG00000198053|ENSG00000184557|ENSG00000175592|ENSG00000169032|ENSG00000108984|ENSG00000125538|ENSG00000033327|ENSG00000145675|ENSG00000105329|ENSG00000115594|ENSG00000177606	http://www.genome.jp/kegg-bin/show_pathway?hsa04380/hsa:3553%09red/hsa:6773%09red/hsa:140885%09red/hsa:3725%09red/hsa:5295%09red/hsa:5604%09red/hsa:7040%09red/hsa:9846%09red/hsa:3554%09red/hsa:8061%09red/hsa:4286%09red/hsa:9021%09red/hsa:5608%09red
Retinol metabolism	KEGG PATHWAY	hsa00830	7	65	0,248666937566	0,421393672643	ENSG00000003137|ENSG00000197894|ENSG00000162496|ENSG00000196616|ENSG00000165092|ENSG00000138356|ENSG00000128918	http://www.genome.jp/kegg-bin/show_pathway?hsa00830/hsa:9249%09red/hsa:316%09red/hsa:8854%09red/hsa:56603%09red/hsa:128%09red/hsa:216%09red/hsa:125%09red
Arginine biosynthesis	KEGG PATHWAY	hsa00220	3	22	0,259976393512	0,437936424786	ENSG00000135821|ENSG00000021826|ENSG00000007171	http://www.genome.jp/kegg-bin/show_pathway?hsa00220/hsa:4843%09red/hsa:1373%09red/hsa:2752%09red
Base excision repair	KEGG PATHWAY	hsa03410	4	33	0,266297012092	0,439840682349	ENSG00000132646|ENSG00000168496|ENSG00000177084|ENSG00000105486	http://www.genome.jp/kegg-bin/show_pathway?hsa03410/hsa:5426%09red/hsa:5111%09red/hsa:2237%09red/hsa:3978%09red
Apoptosis - multiple species	KEGG PATHWAY	hsa04215	4	33	0,266297012092	0,439840682349	ENSG00000141682|ENSG00000015475|ENSG00000153094|ENSG00000089685	http://www.genome.jp/kegg-bin/show_pathway?hsa04215/hsa:332%09red/hsa:10018%09red/hsa:5366%09red/hsa:637%09red
Ubiquitin mediated proteolysis	KEGG PATHWAY	hsa04120	13	137	0,267196522873	0,439840682349	ENSG00000158290|ENSG00000182179|ENSG00000130939|ENSG00000145604|ENSG00000184557|ENSG00000117399|ENSG00000175063|ENSG00000104517|ENSG00000012048|ENSG00000095015|ENSG00000072422|ENSG00000108854|ENSG00000114423	http://www.genome.jp/kegg-bin/show_pathway?hsa04120/hsa:991%09red/hsa:868%09red/hsa:10277%09red/hsa:672%09red/hsa:64750%09red/hsa:11065%09red/hsa:6502%09red/hsa:51366%09red/hsa:9886%09red/hsa:7318%09red/hsa:8450%09red/hsa:9021%09red/hsa:4214%09red
Herpes simplex infection	KEGG PATHWAY	hsa05168	17	185	0,267323665597	0,439840682349	ENSG00000185745|ENSG00000108691|ENSG00000170312|ENSG00000170581|ENSG00000115267|ENSG00000145604|ENSG00000164136|ENSG00000164342|ENSG00000184557|ENSG00000056558|ENSG00000082512|ENSG00000183684|ENSG00000125730|ENSG00000204267|ENSG00000125538|ENSG00000135828|ENSG00000177606	http://www.genome.jp/kegg-bin/show_pathway?hsa05168/hsa:64135%09red/hsa:3600%09red/hsa:3553%09red/hsa:983%09red/hsa:6773%09red/hsa:7188%09red/hsa:7098%09red/hsa:3725%09red/hsa:6891%09red/hsa:6502%09red/hsa:6347%09red/hsa:718%09red/hsa:3434%09red/hsa:10189%09red/hsa:6041%09red/hsa:9021%09red/hsa:7185%09red
Protein export	KEGG PATHWAY	hsa03060	3	23	0,279705398091	0,457552761039	ENSG00000155463|ENSG00000114902|ENSG00000044574	http://www.genome.jp/kegg-bin/show_pathway?hsa03060/hsa:28972%09red/hsa:3309%09red/hsa:5018%09red
Aldosterone synthesis and secretion	KEGG PATHWAY	hsa04925	8	80	0,285977294525	0,465123990521	ENSG00000107175|ENSG00000150995|ENSG00000160014|ENSG00000182158|ENSG00000006283|ENSG00000087460|ENSG00000157388|ENSG00000183049	http://www.genome.jp/kegg-bin/show_pathway?hsa04925/hsa:3708%09red/hsa:64764%09red/hsa:776%09red/hsa:808%09red/hsa:2778%09red/hsa:10488%09red/hsa:57118%09red/hsa:8913%09red
Viral myocarditis	KEGG PATHWAY	hsa05416	6	57	0,288425229132	0,466424799111	ENSG00000090339|ENSG00000198947|ENSG00000105974|ENSG00000110092|ENSG00000114867|ENSG00000015475	http://www.genome.jp/kegg-bin/show_pathway?hsa05416/hsa:637%09red/hsa:1981%09red/hsa:3383%09red/hsa:595%09red/hsa:857%09red/hsa:1756%09red
Intestinal immune network for IgA production	KEGG PATHWAY	hsa04672	5	46	0,294252994947	0,473145440739	ENSG00000164136|ENSG00000105329|ENSG00000134470|ENSG00000115232|ENSG00000107562	http://www.genome.jp/kegg-bin/show_pathway?hsa04672/hsa:3601%09red/hsa:3600%09red/hsa:3676%09red/hsa:6387%09red/hsa:7040%09red
Vitamin digestion and absorption	KEGG PATHWAY	hsa04977	3	24	0,299562810542	0,478549267087	ENSG00000185339|ENSG00000084674|ENSG00000169814	http://www.genome.jp/kegg-bin/show_pathway?hsa04977/hsa:686%09red/hsa:338%09red/hsa:6948%09red
NOD-like receptor signaling pathway	KEGG PATHWAY	hsa04621	6	58	0,30099565209	0,478549267087	ENSG00000091592|ENSG00000108691|ENSG00000118503|ENSG00000150782|ENSG00000125538|ENSG00000137752	http://www.genome.jp/kegg-bin/show_pathway?hsa04621/hsa:22861%09red/hsa:834%09red/hsa:3553%09red/hsa:7128%09red/hsa:3606%09red/hsa:6347%09red
Fc epsilon RI signaling pathway	KEGG PATHWAY	hsa04664	7	70	0,304915792095	0,479550904449	ENSG00000254087|ENSG00000115904|ENSG00000116711|ENSG00000169032|ENSG00000108984|ENSG00000033327|ENSG00000145675	http://www.genome.jp/kegg-bin/show_pathway?hsa04664/hsa:5321%09red/hsa:5295%09red/hsa:6654%09red/hsa:5604%09red/hsa:9846%09red/hsa:4067%09red/hsa:5608%09red
Chemical carcinogenesis	KEGG PATHWAY	hsa05204	8	82	0,307108965622	0,479550904449	ENSG00000197894|ENSG00000138061|ENSG00000143437|ENSG00000184254|ENSG00000143198|ENSG00000073756|ENSG00000196616|ENSG00000134201	http://www.genome.jp/kegg-bin/show_pathway?hsa05204/hsa:220%09red/hsa:405%09red/hsa:5743%09red/hsa:4259%09red/hsa:2949%09red/hsa:128%09red/hsa:1545%09red/hsa:125%09red
Endocrine and other factor-regulated calcium reabsorption	KEGG PATHWAY	hsa04961	5	47	0,308403761872	0,479550904449	ENSG00000087460|ENSG00000070371|ENSG00000070961|ENSG00000091831|ENSG00000163399	http://www.genome.jp/kegg-bin/show_pathway?hsa04961/hsa:476%09red/hsa:490%09red/hsa:8218%09red/hsa:2778%09red/hsa:2099%09red
Sphingolipid metabolism	KEGG PATHWAY	hsa00600	5	47	0,308403761872	0,479550904449	ENSG00000166224|ENSG00000078124|ENSG00000104763|ENSG00000198964|ENSG00000162407	http://www.genome.jp/kegg-bin/show_pathway?hsa00600/hsa:8613%09red/hsa:55331%09red/hsa:427%09red/hsa:8879%09red/hsa:259230%09red
Folate biosynthesis	KEGG PATHWAY	hsa00790	2	14	0,315594710504	0,487725974788	ENSG00000131979|ENSG00000137563	http://www.genome.jp/kegg-bin/show_pathway?hsa00790/hsa:8836%09red/hsa:2643%09red
Toxoplasmosis	KEGG PATHWAY	hsa05145	11	119	0,317108054279	0,487725974788	ENSG00000007171|ENSG00000105329|ENSG00000126803|ENSG00000091409|ENSG00000108984|ENSG00000091136|ENSG00000136869|ENSG00000145675|ENSG00000053747|ENSG00000168610|ENSG00000119699	http://www.genome.jp/kegg-bin/show_pathway?hsa05145/hsa:6774%09red/hsa:7099%09red/hsa:3306%09red/hsa:3912%09red/hsa:5295%09red/hsa:7043%09red/hsa:5608%09red/hsa:7040%09red/hsa:4843%09red/hsa:3909%09red/hsa:3655%09red
Inositol phosphate metabolism	KEGG PATHWAY	hsa00562	7	72	0,328111182392	0,496692389931	ENSG00000111669|ENSG00000138193|ENSG00000127080|ENSG00000143772|ENSG00000078269|ENSG00000119711|ENSG00000115020	http://www.genome.jp/kegg-bin/show_pathway?hsa00562/hsa:200576%09red/hsa:51196%09red/hsa:64768%09red/hsa:3707%09red/hsa:8871%09red/hsa:7167%09red/hsa:4329%09red
Metabolism of xenobiotics by cytochrome P450	KEGG PATHWAY	hsa00980	7	72	0,328111182392	0,496692389931	ENSG00000187134|ENSG00000197894|ENSG00000138061|ENSG00000184254|ENSG00000143198|ENSG00000196616|ENSG00000134201	http://www.genome.jp/kegg-bin/show_pathway?hsa00980/hsa:1645%09red/hsa:220%09red/hsa:2949%09red/hsa:4259%09red/hsa:128%09red/hsa:1545%09red/hsa:125%09red
Longevity regulating pathway	KEGG PATHWAY	hsa04211	9	96	0,328203098647	0,496692389931	ENSG00000107175|ENSG00000017427|ENSG00000106617|ENSG00000149212|ENSG00000004660|ENSG00000182158|ENSG00000109819|ENSG00000145675|ENSG00000083290	http://www.genome.jp/kegg-bin/show_pathway?hsa04211/hsa:64764%09red/hsa:84254%09red/hsa:143686%09red/hsa:3479%09red/hsa:9706%09red/hsa:5295%09red/hsa:51422%09red/hsa:10488%09red/hsa:10891%09red
Fatty acid metabolism	KEGG PATHWAY	hsa01212	5	49	0,336959921481	0,505562995491	ENSG00000188921|ENSG00000206527|ENSG00000130377|ENSG00000134824|ENSG00000149485	http://www.genome.jp/kegg-bin/show_pathway?hsa01212/hsa:201562%09red/hsa:401494%09red/hsa:9415%09red/hsa:3992%09red/hsa:81616%09red
alpha-Linolenic acid metabolism	KEGG PATHWAY	hsa00592	3	26	0,339423919234	0,505562995491	ENSG00000116711|ENSG00000134824|ENSG00000176485	http://www.genome.jp/kegg-bin/show_pathway?hsa00592/hsa:9415%09red/hsa:11145%09red/hsa:5321%09red
Glycosphingolipid biosynthesis - lacto and neolacto series	KEGG PATHWAY	hsa00601	3	26	0,339423919234	0,505562995491	ENSG00000121578|ENSG00000162630|ENSG00000117411	http://www.genome.jp/kegg-bin/show_pathway?hsa00601/hsa:8704%09red/hsa:8707%09red/hsa:8702%09red
Glycosaminoglycan biosynthesis - keratan sulfate	KEGG PATHWAY	hsa00533	2	15	0,342312196108	0,507195557585	ENSG00000121578|ENSG00000117411	http://www.genome.jp/kegg-bin/show_pathway?hsa00533/hsa:8704%09red/hsa:8702%09red
Hepatitis C	KEGG PATHWAY	hsa05160	12	135	0,350349527361	0,515500929746	ENSG00000185745|ENSG00000253958|ENSG00000115904|ENSG00000170581|ENSG00000013297|ENSG00000164342|ENSG00000184557|ENSG00000124762|ENSG00000145675|ENSG00000168610|ENSG00000135828|ENSG00000163347	http://www.genome.jp/kegg-bin/show_pathway?hsa05160/hsa:1026%09red/hsa:6774%09red/hsa:6773%09red/hsa:9076%09red/hsa:7098%09red/hsa:5295%09red/hsa:5010%09red/hsa:6041%09red/hsa:6654%09red/hsa:3434%09red/hsa:137075%09red/hsa:9021%09red
Adherens junction	KEGG PATHWAY	hsa04520	7	74	0,351560704738	0,515500929746	ENSG00000142949|ENSG00000006607|ENSG00000132970|ENSG00000127329|ENSG00000095637|ENSG00000112290|ENSG00000173482	http://www.genome.jp/kegg-bin/show_pathway?hsa04520/hsa:5787%09red/hsa:5792%09red/hsa:10580%09red/hsa:8936%09red/hsa:9855%09red/hsa:10810%09red/hsa:5797%09red
Caffeine metabolism	KEGG PATHWAY	hsa00232	1	5	0,357025416215	0,518144578404	ENSG00000158125	http://www.genome.jp/kegg-bin/show_pathway?hsa00232/hsa:7498%09red
Butirosin and neomycin biosynthesis	KEGG PATHWAY	hsa00524	1	5	0,357025416215	0,518144578404	ENSG00000159399	http://www.genome.jp/kegg-bin/show_pathway?hsa00524/hsa:3099%09red
Cardiac muscle contraction	KEGG PATHWAY	hsa04260	7	75	0,363351473216	0,524635035306	ENSG00000174437|ENSG00000075461|ENSG00000163399|ENSG00000157388|ENSG00000143549|ENSG00000118194|ENSG00000090020	http://www.genome.jp/kegg-bin/show_pathway?hsa04260/hsa:776%09red/hsa:7139%09red/hsa:27092%09red/hsa:7170%09red/hsa:6548%09red/hsa:476%09red/hsa:488%09red
Amyotrophic lateral sclerosis (ALS)	KEGG PATHWAY	hsa05014	5	51	0,365712040119	0,525362981491	ENSG00000108984|ENSG00000137752|ENSG00000028137|ENSG00000015475|ENSG00000155511	http://www.genome.jp/kegg-bin/show_pathway?hsa05014/hsa:834%09red/hsa:637%09red/hsa:2890%09red/hsa:7133%09red/hsa:5608%09red
GABAergic synapse	KEGG PATHWAY	hsa04727	8	88	0,372104186877	0,531845883264	ENSG00000139112|ENSG00000111371|ENSG00000186297|ENSG00000166206|ENSG00000136928|ENSG00000135821|ENSG00000157388|ENSG00000115993	http://www.genome.jp/kegg-bin/show_pathway?hsa04727/hsa:9568%09red/hsa:2562%09red/hsa:2752%09red/hsa:2558%09red/hsa:81539%09red/hsa:66008%09red/hsa:23710%09red/hsa:776%09red
Cholinergic synapse	KEGG PATHWAY	hsa04725	10	113	0,375274894293	0,533682387362	ENSG00000107175|ENSG00000150995|ENSG00000181072|ENSG00000182158|ENSG00000185760|ENSG00000133019|ENSG00000162989|ENSG00000145675|ENSG00000157388|ENSG00000169032	http://www.genome.jp/kegg-bin/show_pathway?hsa04725/hsa:3708%09red/hsa:64764%09red/hsa:776%09red/hsa:56479%09red/hsa:5295%09red/hsa:10488%09red/hsa:5604%09red/hsa:3760%09red/hsa:1131%09red/hsa:1129%09red
Nicotine addiction	KEGG PATHWAY	hsa05033	4	40	0,381048456812	0,536501061083	ENSG00000155511|ENSG00000166206|ENSG00000125675|ENSG00000186297	http://www.genome.jp/kegg-bin/show_pathway?hsa05033/hsa:2558%09red/hsa:2890%09red/hsa:2562%09red/hsa:2892%09red
Tryptophan metabolism	KEGG PATHWAY	hsa00380	4	40	0,381048456812	0,536501061083	ENSG00000138356|ENSG00000111275|ENSG00000189221|ENSG00000138061	http://www.genome.jp/kegg-bin/show_pathway?hsa00380/hsa:1545%09red/hsa:316%09red/hsa:4128%09red/hsa:217%09red
RNA degradation	KEGG PATHWAY	hsa03018	7	77	0,387007912039	0,542194253005	ENSG00000112941|ENSG00000067057|ENSG00000166938|ENSG00000141959|ENSG00000111674|ENSG00000074800|ENSG00000128534	http://www.genome.jp/kegg-bin/show_pathway?hsa03018/hsa:2023%09red/hsa:2026%09red/hsa:11044%09red/hsa:51691%09red/hsa:5211%09red/hsa:115752%09red/hsa:5214%09red
Selenocompound metabolism	KEGG PATHWAY	hsa00450	2	17	0,394630540455	0,544169319133	ENSG00000198682|ENSG00000198431	http://www.genome.jp/kegg-bin/show_pathway?hsa00450/hsa:7296%09red/hsa:9060%09red
Phenylalanine metabolism	KEGG PATHWAY	hsa00360	2	17	0,394630540455	0,544169319133	ENSG00000184254|ENSG00000189221	http://www.genome.jp/kegg-bin/show_pathway?hsa00360/hsa:4128%09red/hsa:220%09red
Aldosterone-regulated sodium reabsorption	KEGG PATHWAY	hsa04960	4	41	0,397486141867	0,544169319133	ENSG00000145675|ENSG00000163399|ENSG00000118515|ENSG00000017427	http://www.genome.jp/kegg-bin/show_pathway?hsa04960/hsa:476%09red/hsa:3479%09red/hsa:5295%09red/hsa:6446%09red
Fat digestion and absorption	KEGG PATHWAY	hsa04975	4	41	0,397486141867	0,544169319133	ENSG00000135218|ENSG00000084674|ENSG00000162407|ENSG00000165029	http://www.genome.jp/kegg-bin/show_pathway?hsa04975/hsa:8613%09red/hsa:19%09red/hsa:338%09red/hsa:948%09red
Homologous recombination	KEGG PATHWAY	hsa03440	3	29	0,39878888932	0,544169319133	ENSG00000085999|ENSG00000197299|ENSG00000051180	http://www.genome.jp/kegg-bin/show_pathway?hsa03440/hsa:5888%09red/hsa:641%09red/hsa:8438%09red
Vitamin B6 metabolism	KEGG PATHWAY	hsa00750	1	6	0,402659710073	0,544169319133	ENSG00000138356	http://www.genome.jp/kegg-bin/show_pathway?hsa00750/hsa:316%09red
Shigellosis	KEGG PATHWAY	hsa05131	6	66	0,403800554834	0,544169319133	ENSG00000131504|ENSG00000180353|ENSG00000161638|ENSG00000163466|ENSG00000112290|ENSG00000070087	http://www.genome.jp/kegg-bin/show_pathway?hsa05131/hsa:10109%09red/hsa:3678%09red/hsa:3059%09red/hsa:1729%09red/hsa:5217%09red/hsa:8936%09red
Long-term potentiation	KEGG PATHWAY	hsa04720	6	66	0,403800554834	0,544169319133	ENSG00000150995|ENSG00000160014|ENSG00000071242|ENSG00000155511|ENSG00000169032|ENSG00000079337	http://www.genome.jp/kegg-bin/show_pathway?hsa04720/hsa:3708%09red/hsa:10411%09red/hsa:6196%09red/hsa:808%09red/hsa:2890%09red/hsa:5604%09red
Dopaminergic synapse	KEGG PATHWAY	hsa04728	11	129	0,408305501822	0,545779520281	ENSG00000107175|ENSG00000189221|ENSG00000160014|ENSG00000141404|ENSG00000182158|ENSG00000155511|ENSG00000162989|ENSG00000150995|ENSG00000125675|ENSG00000087460|ENSG00000157388	http://www.genome.jp/kegg-bin/show_pathway?hsa04728/hsa:3708%09red/hsa:64764%09red/hsa:776%09red/hsa:2774%09red/hsa:808%09red/hsa:2778%09red/hsa:2892%09red/hsa:2890%09red/hsa:10488%09red/hsa:3760%09red/hsa:4128%09red
Endometrial cancer	KEGG PATHWAY	hsa05213	5	54	0,408852502826	0,545779520281	ENSG00000145675|ENSG00000136997|ENSG00000110092|ENSG00000115904|ENSG00000169032	http://www.genome.jp/kegg-bin/show_pathway?hsa05213/hsa:6654%09red/hsa:595%09red/hsa:5604%09red/hsa:5295%09red/hsa:4609%09red
Alcoholism	KEGG PATHWAY	hsa05034	15	180	0,411481506234	0,546710170255	ENSG00000107175|ENSG00000189221|ENSG00000160014|ENSG00000099284|ENSG00000115904|ENSG00000182158|ENSG00000148053|ENSG00000004660|ENSG00000188486|ENSG00000148082|ENSG00000087460|ENSG00000170425|ENSG00000176697|ENSG00000169032|ENSG00000116478	http://www.genome.jp/kegg-bin/show_pathway?hsa05034/hsa:64764%09red/hsa:4915%09red/hsa:808%09red/hsa:2778%09red/hsa:84254%09red/hsa:55506%09red/hsa:53358%09red/hsa:3014%09red/hsa:6654%09red/hsa:10488%09red/hsa:5604%09red/hsa:3065%09red/hsa:136%09red/hsa:4128%09red/hsa:627%09red
Taste transduction	KEGG PATHWAY	hsa04742	7	82	0,446079356502	0,589908681729	ENSG00000115252|ENSG00000186297|ENSG00000133019|ENSG00000136928|ENSG00000136531|ENSG00000169432|ENSG00000154678	http://www.genome.jp/kegg-bin/show_pathway?hsa04742/hsa:9568%09red/hsa:5137%09red/hsa:5136%09red/hsa:2558%09red/hsa:6326%09red/hsa:6335%09red/hsa:1131%09red
Toll-like receptor signaling pathway	KEGG PATHWAY	hsa04620	9	108	0,451123533917	0,591632154008	ENSG00000107968|ENSG00000164342|ENSG00000169032|ENSG00000108984|ENSG00000125538|ENSG00000136869|ENSG00000145675|ENSG00000118785|ENSG00000177606	http://www.genome.jp/kegg-bin/show_pathway?hsa04620/hsa:3553%09red/hsa:7098%09red/hsa:7099%09red/hsa:3725%09red/hsa:5295%09red/hsa:5604%09red/hsa:1326%09red/hsa:6696%09red/hsa:5608%09red
Starch and sucrose metabolism	KEGG PATHWAY	hsa00500	5	57	0,45156376419	0,591632154008	ENSG00000104812|ENSG00000115652|ENSG00000159399|ENSG00000114480|ENSG00000105220	http://www.genome.jp/kegg-bin/show_pathway?hsa00500/hsa:3099%09red/hsa:2821%09red/hsa:80146%09red/hsa:2632%09red/hsa:2997%09red
Fatty acid degradation	KEGG PATHWAY	hsa00071	4	45	0,462244639314	0,600069875806	ENSG00000111275|ENSG00000130377|ENSG00000197894|ENSG00000196616	http://www.genome.jp/kegg-bin/show_pathway?hsa00071/hsa:125%09red/hsa:128%09red/hsa:81616%09red/hsa:217%09red
Vasopressin-regulated water reabsorption	KEGG PATHWAY	hsa04962	4	45	0,462244639314	0,600069875806	ENSG00000182158|ENSG00000107175|ENSG00000141522|ENSG00000087460	http://www.genome.jp/kegg-bin/show_pathway?hsa04962/hsa:64764%09red/hsa:10488%09red/hsa:396%09red/hsa:2778%09red
Regulation of lipolysis in adipocytes	KEGG PATHWAY	hsa04923	5	58	0,465627431005	0,601701200797	ENSG00000145675|ENSG00000087460|ENSG00000095303|ENSG00000176485|ENSG00000073756	http://www.genome.jp/kegg-bin/show_pathway?hsa04923/hsa:5742%09red/hsa:5743%09red/hsa:2778%09red/hsa:5295%09red/hsa:11145%09red
Bile secretion	KEGG PATHWAY	hsa04976	6	71	0,46787493303	0,601857300216	ENSG00000144959|ENSG00000090020|ENSG00000163399|ENSG00000005471|ENSG00000087460|ENSG00000080709	http://www.genome.jp/kegg-bin/show_pathway?hsa04976/hsa:2778%09red/hsa:5244%09red/hsa:3781%09red/hsa:6548%09red/hsa:476%09red/hsa:57552%09red
Hedgehog signaling pathway	KEGG PATHWAY	hsa04340	4	46	0,478073144142	0,609435584649	ENSG00000180447|ENSG00000108854|ENSG00000110092|ENSG00000106571	http://www.genome.jp/kegg-bin/show_pathway?hsa04340/hsa:2737%09red/hsa:595%09red/hsa:2619%09red/hsa:64750%09red
Ether lipid metabolism	KEGG PATHWAY	hsa00565	4	46	0,478073144142	0,609435584649	ENSG00000116711|ENSG00000162407|ENSG00000176485|ENSG00000075651	http://www.genome.jp/kegg-bin/show_pathway?hsa00565/hsa:5337%09red/hsa:8613%09red/hsa:11145%09red/hsa:5321%09red
Chemokine signaling pathway	KEGG PATHWAY	hsa04062	15	189	0,48181432667	0,611450468375	ENSG00000068831|ENSG00000108691|ENSG00000148082|ENSG00000115904|ENSG00000170581|ENSG00000254087|ENSG00000107562|ENSG00000145824|ENSG00000169032|ENSG00000198873|ENSG00000124126|ENSG00000145675|ENSG00000168610|ENSG00000120899|ENSG00000161921	http://www.genome.jp/kegg-bin/show_pathway?hsa04062/hsa:6774%09red/hsa:6387%09red/hsa:6773%09red/hsa:2869%09red/hsa:5604%09red/hsa:58191%09red/hsa:5295%09red/hsa:6347%09red/hsa:6654%09red/hsa:9547%09red/hsa:53358%09red/hsa:10235%09red/hsa:4067%09red/hsa:57580%09red/hsa:2185%09red
Non-alcoholic fatty liver disease (NAFLD)	KEGG PATHWAY	hsa04932	12	153	0,507925856664	0,637353097054	ENSG00000174697|ENSG00000185633|ENSG00000106617|ENSG00000009950|ENSG00000184557|ENSG00000160712|ENSG00000153094|ENSG00000125538|ENSG00000145675|ENSG00000105329|ENSG00000015475|ENSG00000177606	http://www.genome.jp/kegg-bin/show_pathway?hsa04932/hsa:637%09red/hsa:3553%09red/hsa:3725%09red/hsa:51085%09red/hsa:3952%09red/hsa:3570%09red/hsa:10018%09red/hsa:5295%09red/hsa:51422%09red/hsa:7040%09red/hsa:56901%09red/hsa:9021%09red
Carbohydrate digestion and absorption	KEGG PATHWAY	hsa04973	4	48	0,509160216349	0,637353097054	ENSG00000145675|ENSG00000157388|ENSG00000159399|ENSG00000163399	http://www.genome.jp/kegg-bin/show_pathway?hsa04973/hsa:476%09red/hsa:3099%09red/hsa:776%09red/hsa:5295%09red
Valine	leucine and isoleucine degradation	KEGG PATHWAY	hsa00280	4	48	0,509160216349	0.637353	ENSG00000138356|ENSG00000111275|ENSG00000119711|ENSG00000137992	http://www.genome.jp/kegg-bin/show_pathway?hsa00280/hsa:1629%09red/hsa:316%09red/hsa:4329%09red/hsa:217%09red
Primary immunodeficiency	KEGG PATHWAY	hsa05340	3	35	0,511893871888	0,637353097054	ENSG00000168685|ENSG00000204267|ENSG00000166349	http://www.genome.jp/kegg-bin/show_pathway?hsa05340/hsa:5896%09red/hsa:6891%09red/hsa:3575%09red
Retrograde endocannabinoid signaling	KEGG PATHWAY	hsa04723	8	101	0,513485887379	0,637353097054	ENSG00000150995|ENSG00000186297|ENSG00000155511|ENSG00000162989|ENSG00000073756|ENSG00000166206|ENSG00000125675|ENSG00000157388	http://www.genome.jp/kegg-bin/show_pathway?hsa04723/hsa:3708%09red/hsa:776%09red/hsa:5743%09red/hsa:2892%09red/hsa:2890%09red/hsa:2558%09red/hsa:3760%09red/hsa:2562%09red
SNARE interactions in vesicular transport	KEGG PATHWAY	hsa04130	3	36	0,52965879411	0,654556501018	ENSG00000113734|ENSG00000136874|ENSG00000106089	http://www.genome.jp/kegg-bin/show_pathway?hsa04130/hsa:55014%09red/hsa:6804%09red/hsa:662%09red
Cytosolic DNA-sensing pathway	KEGG PATHWAY	hsa04623	5	63	0,534005247218	0,657058630272	ENSG00000125538|ENSG00000184584|ENSG00000150782|ENSG00000137752|ENSG00000160710	http://www.genome.jp/kegg-bin/show_pathway?hsa04623/hsa:834%09red/hsa:3553%09red/hsa:103%09red/hsa:340061%09red/hsa:3606%09red
VEGF signaling pathway	KEGG PATHWAY	hsa04370	5	64	0,547207975161	0,670388991215	ENSG00000145675|ENSG00000116711|ENSG00000112715|ENSG00000073756|ENSG00000169032	http://www.genome.jp/kegg-bin/show_pathway?hsa04370/hsa:5321%09red/hsa:5743%09red/hsa:5604%09red/hsa:5295%09red/hsa:7422%09red
Synthesis and degradation of ketone bodies	KEGG PATHWAY	hsa00072	1	10	0,555039424769	0,674146597466	ENSG00000161267	http://www.genome.jp/kegg-bin/show_pathway?hsa00072/hsa:622%09red
Sulfur metabolism	KEGG PATHWAY	hsa00920	1	10	0,555039424769	0,674146597466	ENSG00000198682	http://www.genome.jp/kegg-bin/show_pathway?hsa00920/hsa:9060%09red
Tuberculosis	KEGG PATHWAY	hsa05152	13	174	0,57167067827	0,68994252658	ENSG00000120837|ENSG00000007171|ENSG00000160014|ENSG00000141068|ENSG00000150782|ENSG00000125730|ENSG00000136869|ENSG00000125538|ENSG00000105329|ENSG00000102879|ENSG00000015475|ENSG00000153246|ENSG00000119699	http://www.genome.jp/kegg-bin/show_pathway?hsa05152/hsa:637%09red/hsa:3553%09red/hsa:22925%09red/hsa:11151%09red/hsa:3606%09red/hsa:7099%09red/hsa:7040%09red/hsa:4801%09red/hsa:718%09red/hsa:8844%09red/hsa:7043%09red/hsa:808%09red/hsa:4843%09red
Longevity regulating pathway - multiple species	KEGG PATHWAY	hsa04213	5	66	0,57305874177	0,68994252658	ENSG00000145675|ENSG00000106617|ENSG00000116478|ENSG00000126803|ENSG00000017427	http://www.genome.jp/kegg-bin/show_pathway?hsa04213/hsa:51422%09red/hsa:3306%09red/hsa:3479%09red/hsa:3065%09red/hsa:5295%09red
T cell receptor signaling pathway	KEGG PATHWAY	hsa04660	8	107	0,575358432059	0,68994252658	ENSG00000065675|ENSG00000114423|ENSG00000115904|ENSG00000107968|ENSG00000075711|ENSG00000169032|ENSG00000145675|ENSG00000177606	http://www.genome.jp/kegg-bin/show_pathway?hsa04660/hsa:868%09red/hsa:1326%09red/hsa:3725%09red/hsa:5588%09red/hsa:5295%09red/hsa:6654%09red/hsa:5604%09red/hsa:1739%09red
Fatty acid elongation	KEGG PATHWAY	hsa00062	2	25	0,580376693875	0,693023647116	ENSG00000206527|ENSG00000188921	http://www.genome.jp/kegg-bin/show_pathway?hsa00062/hsa:201562%09red/hsa:401494%09red
Taurine and hypotaurine metabolism	KEGG PATHWAY	hsa00430	1	11	0,586625776286	0,694623827151	ENSG00000100031	http://www.genome.jp/kegg-bin/show_pathway?hsa00430/hsa:2678%09red
Ubiquinone and other terpenoid-quinone biosynthesis	KEGG PATHWAY	hsa00130	1	11	0,586625776286	0,694623827151	ENSG00000167397	http://www.genome.jp/kegg-bin/show_pathway?hsa00130/hsa:79001%09red
Regulation of autophagy	KEGG PATHWAY	hsa04140	3	40	0,596893983715	0,699701196071	ENSG00000139112|ENSG00000125703|ENSG00000083290	http://www.genome.jp/kegg-bin/show_pathway?hsa04140/hsa:23710%09red/hsa:9706%09red/hsa:84938%09red
Epithelial cell signaling in Helicobacter pylori infection	KEGG PATHWAY	hsa05120	5	68	0,598115108613	0,699701196071	ENSG00000113070|ENSG00000154721|ENSG00000158769|ENSG00000254087|ENSG00000177606	http://www.genome.jp/kegg-bin/show_pathway?hsa05120/hsa:3725%09red/hsa:58494%09red/hsa:4067%09red/hsa:1839%09red/hsa:50848%09red
Sphingolipid signaling pathway	KEGG PATHWAY	hsa04071	9	123	0,598331058125	0,699701196071	ENSG00000166224|ENSG00000198964|ENSG00000075651|ENSG00000169032|ENSG00000170989|ENSG00000033327|ENSG00000145675|ENSG00000104763|ENSG00000015475	http://www.genome.jp/kegg-bin/show_pathway?hsa04071/hsa:5337%09red/hsa:637%09red/hsa:427%09red/hsa:5295%09red/hsa:259230%09red/hsa:5604%09red/hsa:9846%09red/hsa:8879%09red/hsa:1901%09red
Peroxisome	KEGG PATHWAY	hsa04146	6	83	0,611225908213	0,711839226437	ENSG00000007171|ENSG00000101417|ENSG00000168306|ENSG00000138413|ENSG00000158125|ENSG00000064763	http://www.genome.jp/kegg-bin/show_pathway?hsa04146/hsa:11264%09red/hsa:8309%09red/hsa:3417%09red/hsa:55711%09red/hsa:4843%09red/hsa:7498%09red
Non-homologous end-joining	KEGG PATHWAY	hsa03450	1	13	0,643234028594	0,746046024968	ENSG00000168496	http://www.genome.jp/kegg-bin/show_pathway?hsa03450/hsa:2237%09red
B cell receptor signaling pathway	KEGG PATHWAY	hsa04662	5	74	0,668023281481	0,763392664456	ENSG00000145675|ENSG00000177606|ENSG00000115904|ENSG00000254087|ENSG00000169032	http://www.genome.jp/kegg-bin/show_pathway?hsa04662/hsa:4067%09red/hsa:3725%09red/hsa:5604%09red/hsa:5295%09red/hsa:6654%09red
Fatty acid biosynthesis	KEGG PATHWAY	hsa00061	1	14	0,668562536378	0,763392664456	ENSG00000130377	http://www.genome.jp/kegg-bin/show_pathway?hsa00061/hsa:81616%09red
Cysteine and methionine metabolism	KEGG PATHWAY	hsa00270	3	45	0,671603982136	0,763392664456	ENSG00000001084|ENSG00000102172|ENSG00000134333	http://www.genome.jp/kegg-bin/show_pathway?hsa00270/hsa:6611%09red/hsa:2729%09red/hsa:3939%09red
Linoleic acid metabolism	KEGG PATHWAY	hsa00591	2	30	0,673429644916	0,763392664456	ENSG00000116711|ENSG00000176485	http://www.genome.jp/kegg-bin/show_pathway?hsa00591/hsa:11145%09red/hsa:5321%09red
Citrate cycle (TCA cycle)	KEGG PATHWAY	hsa00020	2	30	0,673429644916	0,763392664456	ENSG00000173599|ENSG00000138413	http://www.genome.jp/kegg-bin/show_pathway?hsa00020/hsa:3417%09red/hsa:5091%09red
Steroid hormone biosynthesis	KEGG PATHWAY	hsa00140	4	60	0,674375145279	0,763392664456	ENSG00000138061|ENSG00000196139|ENSG00000187134|ENSG00000145545	http://www.genome.jp/kegg-bin/show_pathway?hsa00140/hsa:6715%09red/hsa:1645%09red/hsa:8644%09red/hsa:1545%09red
Glycosphingolipid biosynthesis - ganglio series	KEGG PATHWAY	hsa00604	1	15	0,69209372477	0,780328781314	ENSG00000117069	http://www.genome.jp/kegg-bin/show_pathway?hsa00604/hsa:81849%09red
Primary bile acid biosynthesis	KEGG PATHWAY	hsa00120	1	17	0,734265012539	0,822837668948	ENSG00000168306	http://www.genome.jp/kegg-bin/show_pathway?hsa00120/hsa:8309%09red
Vibrio cholerae infection	KEGG PATHWAY	hsa05110	3	50	0,735611060932	0,822837668948	ENSG00000087460|ENSG00000155660|ENSG00000100196	http://www.genome.jp/kegg-bin/show_pathway?hsa05110/hsa:9601%09red/hsa:11015%09red/hsa:2778%09red
Alanine	aspartate and glutamate metabolism	KEGG PATHWAY	hsa00250	2	35	0,748989303809	0.834504	ENSG00000135821|ENSG00000021826	http://www.genome.jp/kegg-bin/show_pathway?hsa00250/hsa:1373%09red/hsa:2752%09red
2-Oxocarboxylic acid metabolism	KEGG PATHWAY	hsa01210	1	19	0,770663056843	0,855284882692	ENSG00000138413	http://www.genome.jp/kegg-bin/show_pathway?hsa01210/hsa:3417%09red
RIG-I-like receptor signaling pathway	KEGG PATHWAY	hsa04622	4	70	0,77925021478	0,859870251209	ENSG00000184584|ENSG00000095015|ENSG00000115267|ENSG00000187608	http://www.genome.jp/kegg-bin/show_pathway?hsa04622/hsa:9636%09red/hsa:64135%09red/hsa:4214%09red/hsa:340061%09red
Graft-versus-host disease	KEGG PATHWAY	hsa05332	2	38	0,786711791185	0,859870251209	ENSG00000125538|ENSG00000134539	http://www.genome.jp/kegg-bin/show_pathway?hsa05332/hsa:3824%09red/hsa:3553%09red
Steroid biosynthesis	KEGG PATHWAY	hsa00100	1	20	0,786948392449	0,859870251209	ENSG00000170271	http://www.genome.jp/kegg-bin/show_pathway?hsa00100/hsa:10826%09red
One carbon pool by folate	KEGG PATHWAY	hsa00670	1	20	0,786948392449	0,859870251209	ENSG00000176890	http://www.genome.jp/kegg-bin/show_pathway?hsa00670/hsa:7298%09red
Alzheimer's disease	KEGG PATHWAY	hsa05010	10	166	0,808375366189	0,877193339042	ENSG00000150995|ENSG00000174437|ENSG00000182240|ENSG00000185633|ENSG00000111640|ENSG00000125538|ENSG00000160014|ENSG00000157388|ENSG00000119912|ENSG00000015475	http://www.genome.jp/kegg-bin/show_pathway?hsa05010/hsa:3708%09red/hsa:637%09red/hsa:3553%09red/hsa:56901%09red/hsa:776%09red/hsa:808%09red/hsa:2597%09red/hsa:25825%09red/hsa:3416%09red/hsa:488%09red
Glycine	serine and threonine metabolism	KEGG PATHWAY	hsa00260	2	40	0,809001630706	0.877193	ENSG00000189221|ENSG00000171314	http://www.genome.jp/kegg-bin/show_pathway?hsa00260/hsa:5223%09red/hsa:4128%09red
Type I diabetes mellitus	KEGG PATHWAY	hsa04940	2	42	0,829189335019	0,892247741514	ENSG00000125538|ENSG00000109472	http://www.genome.jp/kegg-bin/show_pathway?hsa04940/hsa:3553%09red/hsa:1363%09red
Proximal tubule bicarbonate reclamation	KEGG PATHWAY	hsa04964	1	23	0,829191364022	0,892247741514	ENSG00000163399	http://www.genome.jp/kegg-bin/show_pathway?hsa04964/hsa:476%09red
RNA transport	KEGG PATHWAY	hsa03013	10	171	0,834201004719	0,894238198241	ENSG00000156508|ENSG00000063046|ENSG00000013810|ENSG00000114867|ENSG00000183684|ENSG00000101210|ENSG00000132341|ENSG00000125450|ENSG00000130741|ENSG00000095319	http://www.genome.jp/kegg-bin/show_pathway?hsa03013/hsa:5901%09red/hsa:1981%09red/hsa:1917%09red/hsa:1975%09red/hsa:1915%09red/hsa:23511%09red/hsa:79902%09red/hsa:10460%09red/hsa:10189%09red/hsa:1968%09red
Aminoacyl-tRNA biosynthesis	KEGG PATHWAY	hsa00970	2	44	0,847432422748	0,904993870331	ENSG00000185418|ENSG00000140105	http://www.genome.jp/kegg-bin/show_pathway?hsa00970/hsa:123283%09red/hsa:7453%09red
Proteasome	KEGG PATHWAY	hsa03050	2	45	0,855873001628	0,908845240038	ENSG00000092010|ENSG00000143106	http://www.genome.jp/kegg-bin/show_pathway?hsa03050/hsa:5720%09red/hsa:5686%09red
Huntington's disease	KEGG PATHWAY	hsa05016	11	192	0,859991036342	0,908845240038	ENSG00000107175|ENSG00000150995|ENSG00000185633|ENSG00000127946|ENSG00000070371|ENSG00000182158|ENSG00000213585|ENSG00000118997|ENSG00000109819|ENSG00000176697|ENSG00000116478	http://www.genome.jp/kegg-bin/show_pathway?hsa05016/hsa:3708%09red/hsa:64764%09red/hsa:56901%09red/hsa:56171%09red/hsa:10488%09red/hsa:8218%09red/hsa:10891%09red/hsa:627%09red/hsa:3065%09red/hsa:7416%09red/hsa:3092%09red
Synaptic vesicle cycle	KEGG PATHWAY	hsa04721	3	64	0,863086580554	0,908845240038	ENSG00000132639|ENSG00000070371|ENSG00000106089	http://www.genome.jp/kegg-bin/show_pathway?hsa04721/hsa:8218%09red/hsa:6804%09red/hsa:6616%09red
Drug metabolism - other enzymes	KEGG PATHWAY	hsa00983	2	46	0,863884698128	0,908845240038	ENSG00000158125|ENSG00000167900	http://www.genome.jp/kegg-bin/show_pathway?hsa00983/hsa:7083%09red/hsa:7498%09red
Phototransduction	KEGG PATHWAY	hsa04744	1	27	0,87278862429	0,910789691157	ENSG00000160014	http://www.genome.jp/kegg-bin/show_pathway?hsa04744/hsa:808%09red
Ascorbate and aldarate metabolism	KEGG PATHWAY	hsa00053	1	27	0,87278862429	0,910789691157	ENSG00000111275	http://www.genome.jp/kegg-bin/show_pathway?hsa00053/hsa:217%09red
Parkinson's disease	KEGG PATHWAY	hsa05012	7	134	0,879948123387	0,910789691157	ENSG00000182179|ENSG00000184702|ENSG00000141404|ENSG00000185633|ENSG00000213585|ENSG00000170775|ENSG00000064692	http://www.genome.jp/kegg-bin/show_pathway?hsa05012/hsa:5413%09red/hsa:56901%09red/hsa:2774%09red/hsa:2861%09red/hsa:7416%09red/hsa:7318%09red/hsa:9627%09red
Butanoate metabolism	KEGG PATHWAY	hsa00650	1	28	0,881824647976	0,910789691157	ENSG00000161267	http://www.genome.jp/kegg-bin/show_pathway?hsa00650/hsa:622%09red
Glyoxylate and dicarboxylate metabolism	KEGG PATHWAY	hsa00630	1	28	0,881824647976	0,910789691157	ENSG00000135821	http://www.genome.jp/kegg-bin/show_pathway?hsa00630/hsa:2752%09red
Ribosome	KEGG PATHWAY	hsa03010	7	136	0,888402055218	0,914246478643	ENSG00000142541|ENSG00000174748|ENSG00000265681|ENSG00000158042|ENSG00000136942|ENSG00000185088|ENSG00000266472	http://www.genome.jp/kegg-bin/show_pathway?hsa03010/hsa:54460%09red/hsa:11224%09red/hsa:51065%09red/hsa:63875%09red/hsa:23521%09red/hsa:6138%09red/hsa:6139%09red
Pentose and glucuronate interconversions	KEGG PATHWAY	hsa00040	1	36	0,934462443968	0,958162578416	ENSG00000111275	http://www.genome.jp/kegg-bin/show_pathway?hsa00040/hsa:217%09red
Porphyrin and chlorophyll metabolism	KEGG PATHWAY	hsa00860	1	42	0,957887498935	0,978635964616	ENSG00000089472	http://www.genome.jp/kegg-bin/show_pathway?hsa00860/hsa:9843%09red
mRNA surveillance pathway	KEGG PATHWAY	hsa03015	3	91	0,966895244536	0,983690349487	ENSG00000152684|ENSG00000183684|ENSG00000177613	http://www.genome.jp/kegg-bin/show_pathway?hsa03015/hsa:23283%09red/hsa:10189%09red/hsa:53918%09red
Systemic lupus erythematosus	KEGG PATHWAY	hsa05322	5	132	0,969786598965	0,983690349487	ENSG00000182326|ENSG00000159403|ENSG00000099284|ENSG00000125730|ENSG00000188486	http://www.genome.jp/kegg-bin/show_pathway?hsa05322/hsa:3014%09red/hsa:718%09red/hsa:715%09red/hsa:55506%09red/hsa:716%09red
Ribosome biogenesis in eukaryotes	KEGG PATHWAY	hsa03008	2	83	0,985728202088	0,996289575681	ENSG00000145912|ENSG00000132341	http://www.genome.jp/kegg-bin/show_pathway?hsa03008/hsa:55651%09red/hsa:5901%09red
Spliceosome	KEGG PATHWAY	hsa03040	4	136	0,991152908588	0,998207377688	ENSG00000117360|ENSG00000183684|ENSG00000126803|ENSG00000128534	http://www.genome.jp/kegg-bin/show_pathway?hsa03040/hsa:51691%09red/hsa:3306%09red/hsa:9129%09red/hsa:10189%09red
Oxidative phosphorylation	KEGG PATHWAY	hsa00190	1	124	0,999901173042	0,999999997895	ENSG00000185633	http://www.genome.jp/kegg-bin/show_pathway?hsa00190/hsa:56901%09red
Olfactory transduction	KEGG PATHWAY	hsa04740	6	439	0,999999997895	0,999999997895	ENSG00000115252|ENSG00000160014|ENSG00000141404|ENSG00000154678|ENSG00000116741|ENSG00000100678	http://www.genome.jp/kegg-bin/show_pathway?hsa04740/hsa:5137%09red/hsa:2774%09red/hsa:5136%09red/hsa:808%09red/hsa:6547%09red/hsa:5997%09red
