# Supplementary material for: Involvement of SPATA31 copy number variable genes in human lifespan
Source: Aging (Albany NY). 2018 Apr 19;10(4):674–88. doi: 10.18632/aging.101421 (PMC5940121; doi:10.18632/aging.101421)
Supplement: Supplementary Table S4 [file aging-10-101421-s005.xlsx]

## Sheet: Curated CNV Calls
	SPATA31_All_Control		SPATA31_All_LLI			SPATA31_A_Control		SPATA31_A_LLI		SPATA31_All_Control_Second		SPATA31_All_LLI_Second			SPATA31_A_Control_Second			SPATA31_A_LLI
Control_1	14	Aged_1	13		Control_1	9	Aged_1	8	Control_1	15	Aged_1	12		Control_1	8		Aged_1	5
Control_2	15	Aged_2	14		Control_2	8	Aged_2	7	Control_2	11	Aged_2	12		Control_2	7		Aged_2	6
Control_3	13	Aged_3	13		Control_3	8	Aged_3	6	Control_3	15	Aged_3	16		Control_3	8		Aged_3	8
Control_4	11	Aged_4	14		Control_4	7	Aged_4	8	Control_4	13	Aged_4	15		Control_4	7		Aged_4	7
Control_5	14	Aged_5	12		Control_5	8	Aged_5	7	Control_5	15	Aged_5	11		Control_5	8		Aged_5	7
Control_6	14	Aged_6	16		Control_6	6	Aged_6	8	Control_6	14	Aged_6	13		Control_6	7		Aged_6	6
Control_7	16	Aged_7	15		Control_7	9	Aged_7	8	Control_7	14	Aged_7	13		Control_7	7		Aged_7	7
Control_8	10	Aged_8	13		Control_8	5	Aged_8	8	Control_8	13	Aged_8	11		Control_8	7		Aged_8	5
Control_9	11	Aged_9	12		Control_9	7	Aged_9	7	Control_9	15	Aged_9	11		Control_9	8		Aged_9	5
Control_10	12	Aged_10	12		Control_10	6	Aged_10	7	Control_10	15	Aged_10	10		Control_10	8		Aged_10	5
Control_11	12	Aged_11	13		Control_11	7	Aged_11	7	Control_11	13	Aged_11	9		Control_11	7		Aged_11	4
Control_12	12	Aged_12	13		Control_12	7	Aged_12	8	Control_12	15	Aged_12	13		Control_12	7		Aged_12	7
Control_13	16	Aged_13	12		Control_13	10	Aged_13	8	Control_13	16	Aged_13	12		Control_13	8		Aged_13	6
Control_14	16	Aged_14	14		Control_14	9	Aged_14	7	Control_14	16	Aged_14	11		Control_14	8		Aged_14	6
Control_15	14	Aged_15	13		Control_15	5	Aged_15	6	Control_15	16	Aged_15	14		Control_15	7		Aged_15	7
Control_16	14	Aged_16	12		Control_16	8	Aged_16	7	Control_16	13	Aged_16	11		Control_16	6		Aged_16	5
Control_17	11	Aged_17	14		Control_17	11	Aged_17	7	Control_17	13	Aged_17	11		Control_17	7		Aged_17	5
Control_18	14	Aged_18	13		Control_18	8	Aged_18	7	Control_18	13	Aged_18	12		Control_18	7		Aged_18	6
Control_19	16	Aged_19	13		Control_19	5	Aged_19	7	Control_19	14	Aged_19	12		Control_19	8		Aged_19	7
Control_20	14	Aged_20	14		Control_20	5	Aged_20	8	Control_20	15	Aged_20	11		Control_20	8		Aged_20	6
Control_21	10	Aged_21	12		Control_21	6	Aged_21	7	Control_21	14	Aged_21	13		Control_21	7		Aged_21	7
Control_22	11	Aged_22	13		Control_22	7	Aged_22	7	Control_22	13	Aged_22	17		Control_22	7		Aged_22	9
Control_23	11	Aged_23	11		Control_23	7	Aged_23	7	Control_23	12	Aged_23	11		Control_23	6		Aged_23	6
Control_24	13	Aged_24	13		Control_24	8	Aged_24	6	Control_24	11	Aged_24	12		Control_24	6		Aged_24	5
Control_25	13	Aged_25	12		Control_25	7	Aged_25	7	Control_25	14	Aged_25	11		Control_25	8		Aged_25	6
Control_26	14	Aged_26	15		Control_26	8	Aged_26	8	Control_26	14	Aged_26	12		Control_26	7		Aged_26	6
Control_27	13	Aged_27	12		Control_27	8	Aged_27	9	Control_27	16	Aged_27	14		Control_27	8		Aged_27	7
Control_28	14	Aged_28	13		Control_28	7	Aged_28	6	Control_28	15	Aged_28	11		Control_28	7		Aged_28	6
Control_29	14	Aged_29	12		Control_29	7	Aged_29	8	Control_29	13	Aged_29	10		Control_29	6		Aged_29	5
Control_30	13	Aged_30	12		Control_30	7	Aged_30	9	Control_30	15	Aged_30	11		Control_30	8		Aged_30	6
Control_31	12	Aged_31	13		Control_31	6	Aged_31	7	Control_31	13	Aged_31	11		Control_31	9		Aged_31	6
Control_32	13	Aged_32	15		Control_32	8	Aged_32	6	Control_32	15	Aged_32	11		Control_32	7		Aged_32	6
Control_33	12	Aged_33	11		Control_33	8	Aged_33	8	Control_33	14	Aged_33	11		Control_33	7		Aged_33	6
Control_34	14	Aged_34	11		Control_34	7	Aged_34	8	Control_34	12	Aged_34	11		Control_34	6		Aged_34	6
Control_35	14	Aged_35	12		Control_35	6	Aged_35	7	Control_35	15	Aged_35	10		Control_35	8		Aged_35	5
Control_36	13	Aged_36	12		Control_36	6	Aged_36	6	Control_36	13	Aged_36	11		Control_36	7		Aged_36	6
Control_37	11	Aged_37	14		Control_37	7	Aged_37	7	Control_37	13	Aged_37	11		Control_37	7		Aged_37	6
Control_38	12	Aged_38	15		Control_38	9	Aged_38	6	Control_38	12	Aged_38	11		Control_38	7		Aged_38	6
Control_39	11	Aged_39	13		Control_39	8	Aged_39	8	Control_39	14	Aged_39	11		Control_39	10		Aged_39	6
Control_40	15	Aged_40	11		Control_40	7	Aged_40	8	Control_40	16	Aged_40	11		Control_40	8		Aged_40	6
Control_41	13	Aged_41	13		Control_41	7	Aged_41	7	Control_41	14	Aged_41	11		Control_41	8		Aged_41	6
Control_42	11	Aged_42	11		Control_42	7	Aged_42	7	Control_42	14	Aged_42	12		Control_42	7		Aged_42	6
Control_43	12	Aged_43	12		Control_43	6	Aged_43	8	Control_43	15	Aged_43	12		Control_43	7		Aged_43	6
Control_44	12	Aged_44	12		Control_44	10	Aged_44	7	Control_44	13	Aged_44	10		Control_44	7		Aged_44	6
Control_45	10	Aged_45	11		Control_45	7	Aged_45	7	Control_45	11	Aged_45	12		Control_45	6		Aged_45	7
Control_46	13	Aged_46	13		Control_46	8	Aged_46	8	Control_46	13	Aged_46	14		Control_46	7		Aged_46	7
Control_47	11	Aged_47	8		Control_47	6	Aged_47	7	Control_47	15	Aged_47	14		Control_47	8		Aged_47	7
Control_48	15	Aged_48	12		Control_48	8	Aged_48	8	Control_48	16	Aged_48	12		Control_48	8		Aged_48	6
Control_49	12	Aged_49	11		Control_49	7	Aged_49	7	Control_49	11	Aged_49	14		Control_49	6		Aged_49	8
Control_50	12	Aged_50	14		Control_50	5	Aged_50	7	Control_50	14	Aged_50	12		Control_50	8		Aged_50	6
Control_51	11	Aged_51	9		Control_51	8	Aged_51	8	Control_51	11	Aged_51	13		Control_51	6		Aged_51	6
Control_52	10	Aged_52	11		Control_52	6	Aged_52	8	Control_52	11	Aged_52	12		Control_52	6		Aged_52	7
Control_53	12	Aged_53	8		Control_53	6	Aged_53	7	Control_53	12	Aged_53	10		Control_53	7		Aged_53	6
Control_54	11	Aged_54	11		Control_54	7	Aged_54	7	Control_54	14	Aged_54	12		Control_54	8		Aged_54	7
Control_55	11	Aged_55	11		Control_55	7	Aged_55	7	Control_55	15	Aged_55	15		Control_55	8		Aged_55	7
Control_56	12	Aged_56	11		Control_56	9	Aged_56	8	Control_56	14	Aged_56	12		Control_56	8		Aged_56	5
Control_57	12	Aged_57	12		Control_57	7	Aged_57	6	Control_57	14	Aged_57	11		Control_57	7		Aged_57	6
Control_58	10	Aged_58	10		Control_58	6	Aged_58	7	Control_58	11	Aged_58	10		Control_58	6		Aged_58	12
Control_59	12	Aged_59	10		Control_59	6	Aged_59	5	Control_59	15	Aged_59	10		Control_59	7		Aged_59	5
Control_60	10	Aged_60	11		Control_60	8	Aged_60	7	Control_60	13	Aged_60	11		Control_60	7		Aged_60	5
Control_61	11	Aged_61	10		Control_61	7	Aged_61	6	Control_61	13	Aged_61	13		Control_61	7		Aged_61	6
Control_62	12	Aged_62	12		Control_62	8	Aged_62	7	Control_62	16	Aged_62	14		Control_62	7		Aged_62	7
Control_63	13	Aged_63	11		Control_63	6	Aged_63	8	Control_63	13	Aged_63	10		Control_63	7		Aged_63	8
Control_64	14	Aged_64	11		Control_64	6	Aged_64	6	Control_64	13	Aged_64	10		Control_64	7		Aged_64	7
Control_65	11	Aged_65	11		Control_65	9	Aged_65	6	Control_65	13	Aged_65	12		Control_65	7		Aged_65	6
Control_66	12	Aged_66	10		Control_66	7	Aged_66	6	Control_66	13	Aged_66	11		Control_66	7		Aged_66	6
Control_67	16	Aged_67	10		Control_67	7	Aged_67	7	Control_67	11	Aged_67	11		Control_67	6		Aged_67	6
Control_68	12	Aged_68	11		Control_68	7	Aged_68	7	Control_68	14	Aged_68	12		Control_68	7		Aged_68	6
Control_69	15	Aged_69	11		Control_69	7	Aged_69	8	Control_69	12	Aged_69	12		Control_69	6		Aged_69	6
Control_70	13	Aged_70	11		Control_70	6	Aged_70	6	Control_70	15	Aged_70	10		Control_70	8		Aged_70	6
Control_71	13	Aged_71	12		Control_71	6	Aged_71	6	Control_71	13	Aged_71	11		Control_71	6		Aged_71	7
Control_72	13	Aged_72	11		Control_72	7	Aged_72	8	Control_72	12	Aged_72	11		Control_72	6		Aged_72	6
Control_73	12	Aged_73	11		Control_73	7	Aged_73	7	Control_73	13	Aged_73	12		Control_73	7		Aged_73	6
Control_74	12	Aged_74	10		Control_74	6	Aged_74	7	Control_74	16	Aged_74	13		Control_74	7		Aged_74	7
Control_75	12	Aged_75	11		Control_75	6	Aged_75	7	Control_75	13	Aged_75	10		Control_75	7		Aged_75	6
Control_76	10	Aged_76	12		Control_76	8	Aged_76	5	Control_76	14	Aged_76	14		Control_76	7		Aged_76	7
Control_77	12	Aged_77	13		Control_77	7	Aged_77	7	Control_77	11	Aged_77	11		Control_77	7		Aged_77	6
Control_78	13	Aged_78	11		Control_78	8	Aged_78	7	Control_78	11	Aged_78	10		Control_78	6		Aged_78	7
Control_79	12	Aged_79	11		Control_79	7	Aged_79	7	Control_79	15	Aged_79	11		Control_79	7		Aged_79	6
Control_80	10	Aged_80	11		Control_80	7	Aged_80	7	Control_80	13	Aged_80	11		Control_80	7		Aged_80	5
Control_81	13	Aged_81	10		Control_81	7	Aged_81	7	Control_81	14	Aged_81	12		Control_81	7		Aged_81	5
Control_82	13	Aged_82	10		Control_82	7	Aged_82	6	Control_82	14	Aged_82	10		Control_82	7		Aged_82	6
Control_83	13	Aged_83	10		Control_83	7	Aged_83	6	Control_83	13	Aged_83	12		Control_83	8		Aged_83	7
Control_84	13	Aged_84	10		Control_84	8	Aged_84	7	Control_84	15	Aged_84	11		Control_84	7		Aged_84	5
Control_85	11	Aged_85	11		Control_85	9	Aged_85	7	Control_85	13	Aged_85	12		Control_85	6		Aged_85	6
Control_86	16	Aged_86	11		Control_86	6	Aged_86	7	Control_86	13	Aged_86	11		Control_86	7		Aged_86	7
Control_87	11	Aged_87	11		Control_87	7	Aged_87	6	Control_87	13	Aged_87	12		Control_87	6		Aged_87	6
Control_88	12	Aged_88	10		Control_88	7	Aged_88	7	Control_88	11	Aged_88	10		Control_88	5		Aged_88	6
Control_89	13	Aged_89	13		Control_89	7	Aged_89	6	Control_89	14	Aged_89	10		Control_89	8		Aged_89	7
Control_90	12	Aged_90	17		Control_90	7	Aged_90	6	Control_90	14	Aged_90	15		Control_90	7		Aged_90	5
Control_91	13	Aged_91	11		Control_91	8	Aged_91	8	Control_91	13	Aged_91	12		Control_91	7		Aged_91	5
Control_92	11	Aged_92	12		Control_92	9	Aged_92	8	Control_92	13	Aged_92	11		Control_92	6		Aged_92	8
Control_93	14	Aged_93	14		Control_93	8	Aged_93	6	Control_93	14	Aged_93	9		Control_93	7		Aged_93	7
Control_94	14	Aged_94	14		Control_94	9	Aged_94	6	Control_94	13	Aged_94	13		Control_94	7		Aged_94	7
Control_95	13	Aged_95	18		Control_95	7	Aged_95	7	Control_95	16				Control_95	7		Aged_95	6
Control_96	10	Aged_96	16		Control_96	7	Aged_96	7									Aged_96	6
Control_97	11	Aged_97	13		Control_97	7	Aged_97	7
Control_98	11	Aged_98	12		Control_98	6	Aged_98	7
Control_99	15	Aged_99	14		Control_99	6	Aged_99	6
Control_100	13	Aged_100	14		Control_100	8	Aged_100	9
Control_101	13	Aged_101	12		Control_101	7	Aged_101	8
Control_102	14	Aged_102	11		Control_102	8	Aged_102	8
Control_103	11	Aged_103	11		Control_103	7	Aged_103	7
Control_104	15	Aged_104	11		Control_104	7	Aged_104	8
Control_105	13	Aged_105	16		Control_105	7	Aged_105	6
Control_106	11	Aged_106	14		Control_106	10	Aged_106	7
Control_107	11	Aged_107	14		Control_107	7	Aged_107	7
Control_108	12	Aged_108	16		Control_108	8	Aged_108	7
Control_109	11	Aged_109	14		Control_109	6	Aged_109	6
Control_110	15	Aged_110	14		Control_110	7	Aged_110	7
Control_111	14	Aged_111	13		Control_111	8	Aged_111	6
Control_112	12	Aged_112	11		Control_112	8	Aged_112	7
Control_113	12	Aged_113	13		Control_113	6	Aged_113	8
Control_114	13	Aged_114	12		Control_114	6	Aged_114	7
Control_115	13	Aged_115	11		Control_115	7	Aged_115	8
Control_116	15	Aged_116	12		Control_116	7	Aged_116	9
Control_117	13	Aged_117	13		Control_117	8	Aged_117	8
Control_118	12	Aged_118	12		Control_118	9	Aged_118	8
Control_119	12	Aged_119	11		Control_119	7	Aged_119	8
Control_120	11	Aged_120	11		Control_120	8	Aged_120	8
Control_121	12	Aged_121	11		Control_121	8	Aged_121	6
Control_122	10	Aged_122	12		Control_122	8	Aged_122	5
Control_123	16	Aged_123	11		Control_123	7	Aged_123	7
Control_124	11	Aged_124	10		Control_124	8	Aged_124	7
Control_125	13	Aged_125	12		Control_125	7	Aged_125	9
Control_126	15	Aged_126	12		Control_126	7	Aged_126	8
Control_127	12	Aged_127	11		Control_127	6	Aged_127	8
Control_128	12	Aged_128	11		Control_128	9	Aged_128	7
Control_129	12	Aged_129	12		Control_129	8	Aged_129	7
Control_130	12	Aged_130	13		Control_130	8	Aged_130	7
Control_131	12	Aged_131	11		Control_131	9	Aged_131	7
Control_132	12	Aged_132	12		Control_132	8	Aged_132	7
Control_133	12	Aged_133	15		Control_133	7	Aged_133	7
Control_134	19	Aged_134	13		Control_134	7	Aged_134	7
Control_135	12	Aged_135	12		Control_135	9	Aged_135	7
Control_136	11	Aged_136	10		Control_136	7	Aged_136	7
Control_137	11	Aged_137	13		Control_137	8	Aged_137	7
Control_138	10	Aged_138	11		Control_138	6	Aged_138	9
Control_139	11	Aged_139	11		Control_139	7	Aged_139	7
Control_140	14	Aged_140	12		Control_140	7	Aged_140	7
Control_141	15	Aged_141	12		Control_141	8	Aged_141	7
Control_142	13	Aged_142	11		Control_142	7	Aged_142	7
Control_143	12	Aged_143	13		Control_143	7	Aged_143	10
Control_144	13	Aged_144	13		Control_144	8	Aged_144	7
Control_145	13	Aged_145	14		Control_145	8	Aged_145	7
Control_146	15	Aged_146	12		Control_146	8	Aged_146	7
Control_147	14	Aged_147	13		Control_147	8	Aged_147	7
Control_148	17	Aged_148	12		Control_148	7	Aged_148	8
Control_149	11	Aged_149	15		Control_149	7	Aged_149	7
Control_150	13	Aged_150	12		Control_150	7	Aged_150	7
Control_151	11	Aged_151	15		Control_151	7	Aged_151	8
Control_152	12	Aged_152	13		Control_152	8	Aged_152	7
Control_153	14	Aged_153	14		Control_153	7	Aged_153	10
Control_154	12	Aged_154	16		Control_154	5	Aged_154	7
Control_155	14	Aged_155	12		Control_155	7		7.15584
Control_156	14		12.2194		Control_156	7
Control_157	13				Control_157	9
Control_158	12				Control_158	8
Control_159	15					7.28481
Control_160	15
Control_161	13
Control_162	13
Control_163	14
	12.6626

## Sheet: Raw_CNV_calls_SPATA31_ALL
SPATA31_All_1_6	CNV	Curated		SPATA31_All_1_6	CNV	Curated		SPATA31_All_7_12	CNV	Curated		SPATA31_All_7_12	CNV	Curated		SPATA31_All_1_6_old	CNV	Curated		SPATA31_All_1_6_old	CNV	Curated		SPATA31_All_7_9_old	CNV	Curated		SPATA31_All_7_9_old	CNV	Curated		Plate Cont_03_04-AG_03_04, screen with FM_All_probe run_on_29/11/17
FMA_All_ControlA01	13.8	14		FMA_All_AgedA07	12.6	13		FMA_All_ControlA01	10.6	11		FMA_All_AgedA07	11.6	12		FMA_All_ControlA01	14	14		FMA_All_AgedA07	16.8	17		FMA_All_ControlA03	13.8	14		FMA_All_AgedA06	15	15			Control_FM_All_1-48			LLI_FM_All_1-48			Control_FM_All_49-96			LLI_FM_All_49-96
FMA_All_ControlA02	14.7	15		FMA_All_AgedA08	13.6	14		FMA_All_ControlA02	14.5	15		FMA_All_AgedA08	10.9	11		FMA_All_ControlA02	14.1	14		FMA_All_AgedA08	10.5	11		FMA_All_ControlA04	15.2	15		FMA_All_AgedA07	13.1	13		Sample	CNV_Control	Corrected_CNV_Control	Sample	CNV_LLI	Corrected_CNV_LLI	Sample	CNV_Control	Corrected_CNV_Control	Sample	CNV_LLI	Corrected_CNV_LLI
FMA_All_ControlA03	12.8	13		FMA_All_AgedA09	13.4	13		FMA_All_ControlA03	12	12		FMA_All_AgedA09	12.7	13		FMA_All_ControlA03	12.6	13		FMA_All_AgedA09	11.8	12		FMA_All_ControlA05	12.6	13		FMA_All_AgedA08	12.1	12		FMA_All_ControlA01	14.5	15	FMA_All_AgedA07	11.9	12	FMA_All_ControlA01	11.3	11	FMA_All_AgedA07	14.2	14
FMA_All_ControlA04	10.9	11		FMA_All_AgedA10	13.6	14		FMA_All_ControlA04	12.1	12		FMA_All_AgedA10	8.4	8		FMA_All_ControlA04	10.2	10		FMA_All_AgedA10	13.9	14		FMA_All_ControlB03	11.8	12		FMA_All_AgedB06	9.5	10		FMA_All_ControlA02	10.9	11	FMA_All_AgedA08	11.5	12	FMA_All_ControlA02	13.7	14	FMA_All_AgedA08	11.9	12
FMA_All_ControlA05	13.8	14		FMA_All_AgedA11	11.5	12		FMA_All_ControlA05	10.7	11		FMA_All_AgedA11	11.8	12		FMA_All_ControlA05	11	11		FMA_All_AgedA11	14.3	14		FMA_All_ControlB04	12.9	13		FMA_All_AgedB07	12.9	13		FMA_All_ControlA03	14.7	15	FMA_All_AgedA09	16	16	FMA_All_ControlA03	10.7	11	FMA_All_AgedA09	12.7	13
FMA_All_ControlA06	13.9	14		FMA_All_AgedA12	15.6	16		FMA_All_ControlA06	9.6	10		FMA_All_AgedA12	10.8	11		FMA_All_ControlA06	11.2	11		FMA_All_AgedA12	18.3	18		FMA_All_ControlB05	12.5	13		FMA_All_AgedB08	11.1	11		FMA_All_ControlA04	13.3	13	FMA_All_AgedA10	15.1	15	FMA_All_ControlA04	11.3	11	FMA_All_AgedA10	11.8	12
FMA_All_ControlB01	16.2	16		FMA_All_AgedB07	14.9	15		FMA_All_ControlB01	12.2	12		FMA_All_AgedB07	13.8	14		FMA_All_ControlB01	14.8	15		FMA_All_AgedB07	16.1	16		FMA_All_ControlC03	14.5	15		FMA_All_AgedC06	10.75	11		FMA_All_ControlA05	15.4	15	FMA_All_AgedA11	11.2	11	FMA_All_ControlA05	12.4	12	FMA_All_AgedA11	9.8	10
FMA_All_ControlB02	10.2	10		FMA_All_AgedB08	13.1	13		FMA_All_ControlB02	11.1	11		FMA_All_AgedB08	9.2	9		FMA_All_ControlB02	12.8	13		FMA_All_AgedB08	12.5	13		FMA_All_ControlC04	13.5	14		FMA_All_AgedC07	12.1	12		FMA_All_ControlA06	13.6	14	FMA_All_AgedA12	13	13	FMA_All_ControlA06	14.2	14	FMA_All_AgedA12	11.8	12
FMA_All_ControlB03	11	11		FMA_All_AgedB09	11.8	12		FMA_All_ControlB03	10.5	11		FMA_All_AgedB09	11.4	11		FMA_All_ControlB03	12.6	13		FMA_All_AgedB09	11.9	12		FMA_All_ControlC05	16.5	17		FMA_All_AgedC08	11.7	12		FMA_All_ControlB01	13.6	14	FMA_All_AgedB07	13.1	13	FMA_All_ControlB01	15.1	15	FMA_All_AgedB07	14.5	15
FMA_All_ControlB04	12.1	12		FMA_All_AgedB10	11.5	12		FMA_All_ControlB04	11.9	12		FMA_All_AgedB10	8.21	8		FMA_All_ControlB04	13.7	14		FMA_All_AgedB10	13.5	14		FMA_All_ControlD03	11.4	11		FMA_All_AgedD06	11.2	11		FMA_All_ControlB02	13.2	13	FMA_All_AgedB08	10.9	11	FMA_All_ControlB02	14.4	14	FMA_All_AgedB08	11.8	12
FMA_All_ControlB05	12.2	12		FMA_All_AgedB11	12.5	13		FMA_All_ControlB05	11.8	12		FMA_All_AgedB11	11	11		FMA_All_ControlB05	10.5	11		FMA_All_AgedB11	13.5	14		FMA_All_ControlD04	13.3	13		FMA_All_AgedD07	12.8	13		FMA_All_ControlB03	14.9	15	FMA_All_AgedB09	11.3	11	FMA_All_ControlB03	13.8	14	FMA_All_AgedB09	10.7	11
FMA_All_ControlB06	11.8	12		FMA_All_AgedB12				FMA_All_ControlB06	10.4	10		FMA_All_AgedB12	10.7	11		FMA_All_ControlB06	15	15		FMA_All_AgedB12	11.5	12		FMA_All_ControlD05	10.7	11		FMA_All_AgedD08	12.5	13		FMA_All_ControlB04	14.8	15	FMA_All_AgedB10	10.4	10	FMA_All_ControlB04	11	11	FMA_All_AgedB10		N/A
FMA_All_ControlC01	15.7	16		FMA_All_AgedC07	13.3	13		FMA_All_ControlC01	12	12		FMA_All_AgedC07	11.2	11		FMA_All_ControlC01	13	13		FMA_All_AgedC07	11.1	11		FMA_All_ControlE03	11.7	12		FMA_All_AgedE06	13.8	14		FMA_All_ControlB05	12.5	13	FMA_All_AgedB11	8.7	9	FMA_All_ControlB05	14.9	15	FMA_All_AgedB11	10.04	10
FMA_All_ControlC02	15.8	16		FMA_All_AgedC08				FMA_All_ControlC02	10.4	10		FMA_All_AgedC08	11.7	12		FMA_All_ControlC02	11.1	11		FMA_All_AgedC08	10.6	11		FMA_All_ControlE04	13.5	14		FMA_All_AgedE07	12.1	12		FMA_All_ControlB06	14.8	15	FMA_All_AgedB12	13.2	13	FMA_All_ControlB06	12.7	13	FMA_All_AgedB12	9.82	10
FMA_All_ControlC03	14.1	14		FMA_All_AgedC09	12.4	12		FMA_All_ControlC03	10.7	11		FMA_All_AgedC09	10	10		FMA_All_ControlC03	11.4	11		FMA_All_AgedC09	11.1	11		FMA_All_ControlE05	11.7	12		FMA_All_AgedE08	12.5	13		FMA_All_ControlC01	15.5	16	FMA_All_AgedC07	11.6	12	FMA_All_ControlC01	12.7	13	FMA_All_AgedC07	10.7	11
FMA_All_ControlC04	14.3	14		FMA_All_AgedC10	13.5	14		FMA_All_ControlC04	11.51	12		FMA_All_AgedC10	10.33	10		FMA_All_ControlC04	12	12		FMA_All_AgedC10	16.4	16		FMA_All_ControlF03	13.6	14		FMA_All_AgedF06	12.3	12		FMA_All_ControlC02	15.9	16	FMA_All_AgedC08	10.7	11	FMA_All_ControlC02	15.7	16	FMA_All_AgedC08		N/A
FMA_All_ControlC05	10.9	11		FMA_All_AgedC11	13.3	13		FMA_All_ControlC05	13	13		FMA_All_AgedC11	10.7	11		FMA_All_ControlC05	10.7	11		FMA_All_AgedC11	13.7	14		FMA_All_ControlF04	13.8	14		FMA_All_AgedF07	14.9	15		FMA_All_ControlC03	15.5	16	FMA_All_AgedC09	13.8	14	FMA_All_ControlC03	13.3	13	FMA_All_AgedC09	12.5	13
FMA_All_ControlC06	13.5	14		FMA_All_AgedC12	11.9	12		FMA_All_ControlC06	13.5	14		FMA_All_AgedC12	10	10		FMA_All_ControlC06	14.8	15		FMA_All_AgedC12	14.2	14		FMA_All_ControlF05	13.2	13		FMA_All_AgedF08	11.7	12		FMA_All_ControlC04	13	13	FMA_All_AgedC10	10.89	11	FMA_All_ControlC04	12.8	13	FMA_All_AgedC10	13.7	14
FMA_All_ControlD01	16.1	16		FMA_All_AgedD07	13.8	14		FMA_All_ControlD01	11.2	11		FMA_All_AgedD07	12	12		FMA_All_ControlD01	14.1	14		FMA_All_AgedD07	16	16		FMA_All_ControlG03	11.62	12		FMA_All_AgedG06				FMA_All_ControlC05	12.6	13	FMA_All_AgedC11	11.2	11	FMA_All_ControlC05	13.2	13	FMA_All_AgedC11	10.3	10
FMA_All_ControlD02	14.1	14		FMA_All_AgedD08	13.3	13		FMA_All_ControlD02	11.7	12		FMA_All_AgedD08	10.7	11		FMA_All_ControlD02	12.3	12		FMA_All_AgedD08	14.3	14		FMA_All_ControlG04	15.2	15		FMA_All_AgedG07	15.1	15		FMA_All_ControlC06	13	13	FMA_All_AgedC12	12	12	FMA_All_ControlC06	12.6	13	FMA_All_AgedC12	10.2	10
FMA_All_ControlD03				FMA_All_AgedD09				FMA_All_ControlD03	16.2	16		FMA_All_AgedD09	10.9	11		FMA_All_ControlD03				FMA_All_AgedD09	13.6	14		FMA_All_ControlG05	14.6	15		FMA_All_AgedG08	12.8	13		FMA_All_ControlD01	14	14	FMA_All_AgedD07	12.2	12	FMA_All_ControlD01	10.9	11	FMA_All_AgedD07	11.5	12
FMA_All_ControlD04	9.6	10		FMA_All_AgedD10	12.9	13		FMA_All_ControlD04				FMA_All_AgedD10				FMA_All_ControlD04	12.2	12		FMA_All_AgedD10	12.5	13		FMA_All_ControlH03	12.6	13		FMA_All_AgedH06	13.7	14		FMA_All_ControlD02	14.9	15	FMA_All_AgedD08	10.5	11	FMA_All_ControlD02	14.3	14	FMA_All_AgedD08	10.7	11
FMA_All_ControlD05				FMA_All_AgedD11	13.9	14		FMA_All_ControlD05	11.74	12		FMA_All_AgedD11	11.4	11		FMA_All_ControlD05	12.9	13		FMA_All_AgedD11	11.2	11		FMA_All_ControlH04	13.2	13		FMA_All_AgedH07	16.4	16		FMA_All_ControlD03	14.3	14	FMA_All_AgedD09	13.3	13	FMA_All_ControlD03	12	12	FMA_All_AgedD09	10.7	11
FMA_All_ControlD06	10.8	11		FMA_All_AgedD12	12.4	12		FMA_All_ControlD06	15	15		FMA_All_AgedD12	9.5	10		FMA_All_ControlD06	12.5	13		FMA_All_AgedD12	13.2	13		FMA_All_ControlH05	13.5	14		FMA_All_AgedH08	11.9	12		FMA_All_ControlD04	12.9	13	FMA_All_AgedD10	16.9	17	FMA_All_ControlD04	15.4	15	FMA_All_AgedD10	12.3	12
FMA_All_ControlE01	11.1	11		FMA_All_AgedE07	12.6	13		FMA_All_ControlE01	12.5	13		FMA_All_AgedE07	10.4	10		FMA_All_ControlE01	14.5	15		FMA_All_AgedE07	11.5	12										FMA_All_ControlD05	11.79	12	FMA_All_AgedD11	11.4	11	FMA_All_ControlD05	13.2	13	FMA_All_AgedD11	12.4	12
FMA_All_ControlE02	12.6	13		FMA_All_AgedE08	11.1	11		FMA_All_ControlE02	12.5	13		FMA_All_AgedE08	11	11		FMA_All_ControlE02	13	13		FMA_All_AgedE08												FMA_All_ControlD06	11.2	11	FMA_All_AgedD12	12	12	FMA_All_ControlD06	11.5	12	FMA_All_AgedD12	10	10
FMA_All_ControlE03	13.4	13		FMA_All_AgedE09	12.7	13		FMA_All_ControlE03	12.8	13		FMA_All_AgedE09	10.6	11		FMA_All_ControlE03	12.3	12		FMA_All_AgedE09	10.7	11										FMA_All_ControlE01	13.5	14	FMA_All_AgedE07	11	11	FMA_All_ControlE01	12.7	13	FMA_All_AgedE07	10.5	11
FMA_All_ControlE04	13.9	14		FMA_All_AgedE10	11.7	12		FMA_All_ControlE04	11.9	12		FMA_All_AgedE10	11.2	11		FMA_All_ControlE04	11.7	12		FMA_All_AgedE10	11.8	12										FMA_All_ControlE02	13.5	14	FMA_All_AgedE08	11.5	12	FMA_All_ControlE02	15.6	16	FMA_All_AgedE08	10.5	11
FMA_All_ControlE05	12.9	13		FMA_All_AgedE11	14.5	15		FMA_All_ControlE05	11.5	12		FMA_All_AgedE11	11.7	12		FMA_All_ControlE05	11.1	11		FMA_All_AgedE11	12.7	13										FMA_All_ControlE03	16.1	16	FMA_All_AgedE09	14.2	14	FMA_All_ControlE03	13.2	13	FMA_All_AgedE09	12.1	12
FMA_All_ControlE06	14	14		FMA_All_AgedE12	11.5	12		FMA_All_ControlE06	11.5	12		FMA_All_AgedE12	11	11		FMA_All_ControlE06	12.1	12		FMA_All_AgedE12	12.2	12										FMA_All_ControlE04	14.5	15	FMA_All_AgedE10	11.1	11	FMA_All_ControlE04	N/A	N/A	FMA_All_AgedE10	12.6	13
FMA_All_ControlF01	13.6	14		FMA_All_AgedF07				FMA_All_ControlF01	10.1	10		FMA_All_AgedF07	11.4	11		FMA_All_ControlF01	10.1	10		FMA_All_AgedF07	11.1	11										FMA_All_ControlE05	13.4	13	FMA_All_AgedE11	10.1	10	FMA_All_ControlE05	13.6	14	FMA_All_AgedE11	10.4	10
FMA_All_ControlF02	13.2	13		FMA_All_AgedF08	12.8	13		FMA_All_ControlF02	11.7	12		FMA_All_AgedF08	9.6	10		FMA_All_ControlF02	16.3	16		FMA_All_AgedF08	10.9	11										FMA_All_ControlE06	14.6	15	FMA_All_AgedE12	11.4	11	FMA_All_ControlE06	11.4	11	FMA_All_AgedE12	14.1	14
FMA_All_ControlF03	12.2	12		FMA_All_AgedF09				FMA_All_ControlF03	12.6	13		FMA_All_AgedF09	10.8	11		FMA_All_ControlF03	11.3	11		FMA_All_AgedF09	11.2	11										FMA_All_ControlF01	12.8	13	FMA_All_AgedF07	11.4	11	FMA_All_ControlF01	11.4	11	FMA_All_AgedF07	10.7	11
FMA_All_ControlF04	13.1	13		FMA_All_AgedF10	12.3	12		FMA_All_ControlF04	11.5	12		FMA_All_AgedF10	12	12		FMA_All_ControlF04	13.4	13		FMA_All_AgedF10	11.5	12										FMA_All_ControlF02	15.3	15	FMA_All_AgedF08	11.2	11	FMA_All_ControlF02	15.3	15	FMA_All_AgedF08	10	10
FMA_All_ControlF05	12.1	12		FMA_All_AgedF11	12.1	12		FMA_All_ControlF05	10.3	10		FMA_All_AgedF11	12.7	13		FMA_All_ControlF05	14.5	15		FMA_All_AgedF11												FMA_All_ControlF03	13.8	14	FMA_All_AgedF09	11.3	11	FMA_All_ControlF03	13.2	13	FMA_All_AgedF09	10.55	11
FMA_All_ControlF06	14.1	14		FMA_All_AgedF12	12.8	13		FMA_All_ControlF06	12.9	13		FMA_All_AgedF12	10.6	11		FMA_All_ControlF06	11.9	12		FMA_All_AgedF12												FMA_All_ControlF04	12.2	12	FMA_All_AgedF10	11	11	FMA_All_ControlF04	13.5	14	FMA_All_AgedF10	10.6	11
FMA_All_ControlG01	13.7	14		FMA_All_AgedG07	15.1	15		FMA_All_ControlG01	12.9	13		FMA_All_AgedG07	10.6	11		FMA_All_ControlG01	12.2	12		FMA_All_AgedG07	11.1	11										FMA_All_ControlF05	15	15	FMA_All_AgedF11	9.7	10	FMA_All_ControlF05	13.6	14	FMA_All_AgedF11	11.8	12
FMA_All_ControlG02	12.7	13		FMA_All_AgedG08	10.5	11		FMA_All_ControlG02	13	13		FMA_All_AgedG08	10.5	11		FMA_All_ControlG02	11.6	12		FMA_All_AgedG08	9.4	10										FMA_All_ControlF06	12.5	13	FMA_All_AgedF12	11.3	11	FMA_All_ControlF06	13.1	13	FMA_All_AgedF12	9.83	10
FMA_All_ControlG03	10.7	11		FMA_All_AgedG09	11.4	11		FMA_All_ControlG03	13.2	13		FMA_All_AgedG09	9.9	10		FMA_All_ControlG03	12.1	12		FMA_All_AgedG09	12.4	12										FMA_All_ControlG01	13.4	13	FMA_All_AgedG07	11.3	11	FMA_All_ControlG01	14.8	15	FMA_All_AgedG07	11.5	12
FMA_All_ControlG04	12.2	12		FMA_All_AgedG10	11.8	12		FMA_All_ControlG04	10.9	11		FMA_All_AgedG10	9.7	10		FMA_All_ControlG04	11.5	12		FMA_All_AgedG10	11.6	12										FMA_All_ControlG02	11.9	12	FMA_All_AgedG08	10.5	11	FMA_All_ControlG02	12.5	13	FMA_All_AgedG08	11.4	11
FMA_All_ControlG05	11.4	11		FMA_All_AgedG11	11.7	12		FMA_All_ControlG05	15.5	16		FMA_All_AgedG11	10	10		FMA_All_ControlG05	12.4	12		FMA_All_AgedG11	10.6	11										FMA_All_ControlG03	14.2	14	FMA_All_AgedG09	10.5	11	FMA_All_ControlG03	13.3	13	FMA_All_AgedG09	11.5	12
FMA_All_ControlG06	14.5	15		FMA_All_AgedG12	14.3	14		FMA_All_ControlG06	10.6	11		FMA_All_AgedG12	10.4	10		FMA_All_ControlG06	11.6	12		FMA_All_AgedG12												FMA_All_ControlG04	15.7	16	FMA_All_AgedG10	11.2	11	FMA_All_ControlG04	12.9	13	FMA_All_AgedG10	10.7	11
FMA_All_ControlH01	13.4	13		FMA_All_AgedH07	14.9	15		FMA_All_ControlH01	11.6	12		FMA_All_AgedH07	10.5	11		FMA_All_ControlH01	18.8	19		FMA_All_AgedH07	10.5	11										FMA_All_ControlG05	14.1	14	FMA_All_AgedG11	11.1	11	FMA_All_ControlG05	11.2	11	FMA_All_AgedG11	11.6	12
FMA_All_ControlH02	10.6	11		FMA_All_AgedH08	12.5	13		FMA_All_ControlH02	12.6	13		FMA_All_AgedH08	10.5	11		FMA_All_ControlH02	12	12		FMA_All_AgedH08	11.8	12										FMA_All_ControlG06	14	14	FMA_All_AgedG12	11.9	12	FMA_All_ControlG06	13.9	14	FMA_All_AgedG12	9.59	10
FMA_All_ControlH03	11.9	12		FMA_All_AgedH09	11.1	11		FMA_All_ControlH03	11.5	12		FMA_All_AgedH09	10.2	11		FMA_All_ControlH03	11.2	11		FMA_All_AgedH09	12.5	13										FMA_All_ControlH01	14.8	15	FMA_All_AgedH07	11.5	12	FMA_All_ControlH01	13.7	14	FMA_All_AgedH07	9.94	10
FMA_All_ControlH04	11.9	12		FMA_All_AgedH10	13.1	13		FMA_All_ControlH04	13.1	13		FMA_All_AgedH10	10.1	10		FMA_All_ControlH04	10.8	11		FMA_All_AgedH10	10.5	11										FMA_All_ControlH02	12.6	13	FMA_All_AgedH08	9.9	10	FMA_All_ControlH02	12.8	13	FMA_All_AgedH08	14.6	15
FMA_All_ControlH05	10.2	10		FMA_All_AgedH11	11.1	11		FMA_All_ControlH05	11	11		FMA_All_AgedH11	13.3	13		FMA_All_ControlH05	9.9	10		FMA_All_AgedH11	12.3	12										FMA_All_ControlH03	11	11	FMA_All_AgedH09	12.1	12	FMA_All_ControlH03	13.3	13	FMA_All_AgedH09	12.3	12
FMA_All_ControlH06	13.4	13		FMA_All_AgedH12	11.8	12		FMA_All_ControlH06				FMA_All_AgedH12				FMA_All_ControlH06	11.2	11		FMA_All_AgedH12												FMA_All_ControlH04	12.7	13	FMA_All_AgedH10	13.8	14	FMA_All_ControlH04	14.3	14	FMA_All_AgedH10	11.1	11
																																FMA_All_ControlH05	15	15	FMA_All_AgedH11	13.7	14	FMA_All_ControlH05	12.8	13	FMA_All_AgedH11	9.4	9
																																FMA_All_ControlH06	15.7	16	FMA_All_AgedH12	12	12	FMA_All_ControlH06	16.1	16	FMA_All_AgedH12	13.1	13

## Sheet: Raw_CNV_calls_S{ATA31_A_ALL
SPATA31_A_All_1_6	CNV	Curated		SPATA31_A_All_1_6	CNV	Curated		SPATA31_A_All_7_12	CNV	Curated		SPATA31_A_All_7_12	CNV	Curated		SPATA31_A_All_1_6_old	CNV	Curated		SPATA31_A_All_1_6_old	CNV	Curated		SPATA31_A_All_7_9_old	CNV	Curated		SPATA31_A_All_7_9_old	CNV	Curated		Plate Cont_03_04-AG_03_04, screen with FM_A_probe run_on_29-30/11/17
FMA_2nd_ContA01	9.2	9		FMA_2nd_AgedA07	8.4	8		FMA_2nd_ContA01	7.3	7		FMA_2nd_Aged-6-12A07	7.5	8		FMA_2nd_ContA01	6.2	6		FMA_2nd_AgedA07	8.2	8		FMA_2nd_ContA01	8	8		FMA_2nd_AgedA04	7.9	8			Control_FM_A_1-48			LLI_FM_A_1-48			Control_FM_A_49-96			LLI_FM_A_49-96
FMA_2nd_ContA02	7.7	8		FMA_2nd_AgedA08	7.18	7		FMA_2nd_ContA02	8.1	8		FMA_2nd_Aged-6-12A08	6.34	7		FMA_2nd_ContA02	6.8	7		FMA_2nd_AgedA08	7.47	7		FMA_2nd_ContA02	9.1	9		FMA_2nd_AgedA05	5.71	6		Sample	CNV	Corrected_CNV	Sample	CNV	Corrected_CNV	Sample	CNV	Corrected_CNV	Sample	CNV	Corrected_CNV
FMA_2nd_ContA03	7.62	8		FMA_2nd_AgedA09	6.23	6		FMA_2nd_ContA03	5.86	6		FMA_2nd_Aged-6-12A09	7.8	8		FMA_2nd_ContA03	6.97	7		FMA_2nd_AgedA09	7.6	8		FMA_2nd_ContA03	7.6	8		FMA_2nd_AgedA06	6.4	6		FM_A_ControlA01	7.7	8	FM_A_AgedA07	5.3	5	FM_A_ControlA01	6.2	6	FM_A_AgedA07	7.6	8
FMA_2nd_ContA04	6.73	7		FMA_2nd_AgedA10	7.9	8		FMA_2nd_ContA04	7.7	8		FMA_2nd_Aged-6-12A10	6.6	7		FMA_2nd_ContA04	7.7	8		FMA_2nd_AgedA10	8.7	9		FMA_2nd_ContB01	8.5	9		FMA_2nd_AgedB04				FM_A_ControlA02	6.6	7	FM_A_AgedA08	6.1	6	FM_A_ControlA02	7.6	8	FM_A_AgedA08	6.41	6
FMA_2nd_ContA05	7.7	8		FMA_2nd_AgedA11	6.96	7		FMA_2nd_ContA05	6.6	7		FMA_2nd_Aged-6-12A11	6.63	7		FMA_2nd_ContA05	8.6	9		FMA_2nd_AgedA11	7.5	8		FMA_2nd_ContB02	7.3	7		FMA_2nd_AgedB05	7.23	7		FM_A_ControlA03	7.9	8	FM_A_AgedA09	7.7	8	FM_A_ControlA03	6.4	6	FM_A_AgedA09	6.4	6
FMA_2nd_ContA06	6.33	6		FMA_2nd_AgedA12	7.5	8		FMA_2nd_ContA06	5.17	5		FMA_2nd_Aged-6-12A12	7.5	8		FMA_2nd_ContA06	7.3	7		FMA_2nd_AgedA12	7.5	8		FMA_2nd_ContB03	7.13	7		FMA_2nd_AgedB06	6.5	7		FM_A_ControlA04	7	7	FM_A_AgedA10	7.2	7	FM_A_ControlA04	6.4	6	FM_A_AgedA10	7.2	7
FMA_2nd_ContB01	8.7	9		FMA_2nd_AgedB07	7.7	8		FMA_2nd_ContB01	7.9	8		FMA_2nd_Aged-6-12B07	7.9	8		FMA_2nd_ContB01	7.7	8		FMA_2nd_AgedB07	7.8	8		FMA_2nd_ContC01	7.2	7		FMA_2nd_AgedC04	7.45	7		FM_A_ControlA05	7.7	8	FM_A_AgedA11	6.5	7	FM_A_ControlA05	7.1	7	FM_A_AgedA11	5.55	6
FMA_2nd_ContB02	5.36	5		FMA_2nd_AgedB08	7.5	8		FMA_2nd_ContB02	6.4	6		FMA_2nd_Aged-6-12B08	6.73	7		FMA_2nd_ContB02	7.5	8		FMA_2nd_AgedB08	7.92	8		FMA_2nd_ContC02	6.23	6		FMA_2nd_AgedC05	6.72	7		FM_A_ControlA06	7.1	7	FM_A_AgedA12	5.5	6	FM_A_ControlA06	7.6	8	FM_A_AgedA12	6.5	7
FMA_2nd_ContB03	6.54	7		FMA_2nd_AgedB09	6.59	7		FMA_2nd_ContB03	6.08	6		FMA_2nd_Aged-6-12B09	7.04	7		FMA_2nd_ContB03	8.2	8		FMA_2nd_AgedB09	6.06	6		FMA_2nd_ContC03	6.17	6		FMA_2nd_AgedC06	6.48	6		FM_A_ControlB01	7.3	7	FM_A_AgedB07	6.9	7	FM_A_ControlB01	8.45	8	FM_A_AgedB07	6.8	7
FMA_2nd_ContB04	6.09	6		FMA_2nd_AgedB10	6.63	7		FMA_2nd_ContB04	6.6	7		FMA_2nd_Aged-6-12B10	6.63	7		FMA_2nd_ContB04	6.83	7		FMA_2nd_AgedB10	5.43	5		FMA_2nd_ContD01	7.8	8		FMA_2nd_AgedD04	8.7	9		FM_A_ControlB02	6.8	7	FM_A_AgedB08	5.3	5	FM_A_ControlB02	7.61	8	FM_A_AgedB08	5.46	5
FMA_2nd_ContB05	6.82	7		FMA_2nd_AgedB11	6.57	7		FMA_2nd_ContB05	6.52	7		FMA_2nd_Aged-6-12B11	8.32	8		FMA_2nd_ContB05	7.5	8		FMA_2nd_AgedB11	6.83	7		FMA_2nd_ContD02	6.76	7		FMA_2nd_AgedD05	8.1	8		FM_A_ControlB03	7.9	8	FM_A_AgedB09	5.38	5	FM_A_ControlB03	7.28	7	FM_A_AgedB09	6.49	6
FMA_2nd_ContB06	6.52	7		FMA_2nd_AgedB12	7.8	8		FMA_2nd_ContB06	9	9		FMA_2nd_Aged-6-12B12	6.13	6		FMA_2nd_ContB06	7.3	7		FMA_2nd_AgedB12	6.93	7		FMA_2nd_ContD03				FMA_2nd_AgedD06	8.3	8		FM_A_ControlB04	7.81	8	FM_A_AgedB10	4.83	5	FM_A_ControlB04	5.75	6	FM_A_AgedB10	11.5	12
FMA_2nd_ContC01	9.5	10		FMA_2nd_AgedC07	7.7	8		FMA_2nd_ContC01	7.09	7		FMA_2nd_Aged-6-12C07	7.3	7		FMA_2nd_ContC01	7.3	7		FMA_2nd_AgedC07	8.5	9		FMA_2nd_ContE01	8.4	8		FMA_2nd_AgedE04	6.59	7		FM_A_ControlB05	6.58	7	FM_A_AgedB11	4.28	4	FM_A_ControlB05	7.15	7	FM_A_AgedB11	5.06	5
FMA_2nd_ContC02	9	9		FMA_2nd_AgedC08	7.1	7		FMA_2nd_ContC02	5.57	6		FMA_2nd_Aged-6-12C08	5.46	5		FMA_2nd_ContC02	6.21	6		FMA_2nd_AgedC08	8	8		FMA_2nd_ContE02	7.4	7		FMA_2nd_AgedE05				FM_A_ControlB06	7.03	7	FM_A_AgedB12	6.9	7	FM_A_ControlB06	7.35	7	FM_A_AgedB12	5.1	5
FMA_2nd_ContC03	5.4	5		FMA_2nd_AgedC09	5.56	6		FMA_2nd_ContC03	6.36	6		FMA_2nd_Aged-6-12C09	7.1	7		FMA_2nd_ContC03	9.2	9		FMA_2nd_AgedC09	8.1	8		FMA_2nd_ContE03	6.8	7		FMA_2nd_AgedE06	7.7	8		FM_A_ControlC01	8.4	8	FM_A_AgedC07	5.75	6	FM_A_ControlC01	6.95	7	FM_A_AgedC07	5.81	6
FMA_2nd_ContC04	7.59	8		FMA_2nd_AgedC10	6.92	7		FMA_2nd_ContC04	7.6	8		FMA_2nd_Aged-6-12C10	6.45	6		FMA_2nd_ContC04	7.9	8		FMA_2nd_AgedC10				FMA_2nd_ContF01	6.6	7		FMA_2nd_AgedF04	6.08	6		FM_A_ControlC02	7.55	8	FM_A_AgedC08	5.9	6	FM_A_ControlC02	6.53	7	FM_A_AgedC08	7.16	7
FMA_2nd_ContC05				FMA_2nd_AgedC11	7.16	7		FMA_2nd_ContC05	6.54	7		FMA_2nd_Aged-6-12C11	7.2	7		FMA_2nd_ContC05	7.5	8		FMA_2nd_AgedC11	7.29	7		FMA_2nd_ContF02	9.5	10		FMA_2nd_AgedF05	6.61	7		FM_A_ControlC03	7.49	7	FM_A_AgedC09	6.61	7	FM_A_ControlC03	6.82	7	FM_A_AgedC09	7.94	8
FMA_2nd_ContC06				FMA_2nd_AgedC12	7.16	7		FMA_2nd_ContC06	7.6	8		FMA_2nd_Aged-6-12C12	7.7	8		FMA_2nd_ContC06	9	9		FMA_2nd_AgedC12				FMA_2nd_ContF03	6.69	7		FMA_2nd_AgedF06	6.75	7		FM_A_ControlC04	6	6	FM_A_AgedC10	5.34	5	FM_A_ControlC04	7	7	FM_A_AgedC10	6.58	7
FMA_2nd_ContD01	10.7	11		FMA_2nd_AgedD07	7	7		FMA_2nd_ContD01	6.38	6		FMA_2nd_Aged-6-12D07	5.91	6		FMA_2nd_ContD01	7.9	8		FMA_2nd_AgedD07	7.3	7		FMA_2nd_ContG01	7.6	8		FMA_2nd_AgedG04	6.8	7		FM_A_ControlC05	7.3	7	FM_A_AgedC11	5.47	5	FM_A_ControlC05	7.08	7	FM_A_AgedC11	6.03	6
FMA_2nd_ContD02	7.8	8		FMA_2nd_AgedD08	7.5	8		FMA_2nd_ContD02	6.33	6		FMA_2nd_Aged-6-12D08	5.89	6		FMA_2nd_ContD02	7.05	7		FMA_2nd_AgedD08	7.08	7		FMA_2nd_ContG02	6.46	6		FMA_2nd_AgedG05	6.28	6		FM_A_ControlC06	6.8	7	FM_A_AgedC12	5.85	6	FM_A_ControlC06	7	7	FM_A_AgedC12	5.55	6
FMA_2nd_ContD03				FMA_2nd_AgedD09				FMA_2nd_ContD03	9.4	9		FMA_2nd_Aged-6-12D09	5.99	6		FMA_2nd_ContD03				FMA_2nd_AgedD09	7.2	7		FMA_2nd_ContG03	6.79	7		FMA_2nd_AgedG06	7.3	7		FM_A_ControlD01	7.7	8	FM_A_AgedD07	6.51	7	FM_A_ControlD01	6.14	6	FM_A_AgedD07	5.58	6
FMA_2nd_ContD04	5.32	5		FMA_2nd_AgedD10	7.2	7		FMA_2nd_ContD04				FMA_2nd_Aged-6-12D10				FMA_2nd_ContD04	6.88	7		FMA_2nd_AgedD10	7.32	7		FMA_2nd_ContH01	8.1	8		FMA_2nd_AgedH04	6.2	6		FM_A_ControlD02	7.8	8	FM_A_AgedD08	5.63	6	FM_A_ControlD02	7.29	7	FM_A_AgedD08	5.52	6
FMA_2nd_ContD05				FMA_2nd_AgedD11	7.48	7		FMA_2nd_ContD05	7.02	7		FMA_2nd_Aged-6-12D11	7.3	7		FMA_2nd_ContD05	8.5	9		FMA_2nd_AgedD11	7.02	7		FMA_2nd_ContH02	7.8	8		FMA_2nd_AgedH05	7.1	7		FM_A_ControlD03	7.2	7	FM_A_AgedD09	6.88	7	FM_A_ControlD03	6.35	6	FM_A_AgedD09	5.65	6
FMA_2nd_ContD06	5.25	5		FMA_2nd_AgedD12	6.89	7		FMA_2nd_ContD06	6.64	7		FMA_2nd_Aged-6-12D12	6.78	7		FMA_2nd_ContD06	6.64	7		FMA_2nd_AgedD12	7.44	7		FMA_2nd_ContH03	6.3	6		FMA_2nd_AgedH06				FM_A_ControlD04	6.55	7	FM_A_AgedD10	8.9	9	FM_A_ControlD04	7.79	8	FM_A_AgedD10	5.95	6
FMA_2nd_ContE01	6.03	6		FMA_2nd_AgedE07	5.95	6		FMA_2nd_ContE01	7.2	7		FMA_2nd_Aged-6-12E07	8	8		FMA_2nd_ContE01	7.6	8		FMA_2nd_AgedE07	6.9	7										FM_A_ControlD05	6.11	6	FM_A_AgedD11	6.1	6	FM_A_ControlD05	6	6	FM_A_AgedD11	6.91	7
FMA_2nd_ContE02	6.91	7		FMA_2nd_AgedE08	6.6	7		FMA_2nd_ContE02	6.67	7		FMA_2nd_Aged-6-12E08	6.1	6		FMA_2nd_ContE02	6.12	6		FMA_2nd_AgedE08	7.12	7										FM_A_ControlD06	5.67	6	FM_A_AgedD12	5.43	5	FM_A_ControlD06	5.5	6	FM_A_AgedD12	5.84	6
FMA_2nd_ContE03	7.45	7		FMA_2nd_AgedE09				FMA_2nd_ContE03	6.35	6		FMA_2nd_Aged-6-12E09	6.15	6		FMA_2nd_ContE03	6.98	7		FMA_2nd_AgedE09	6.8	7										FM_A_ControlE01	7.9	8	FM_A_AgedE07	6.28	6	FM_A_ControlE01	6.93	7	FM_A_AgedE07	6.04	6
FMA_2nd_ContE04	7.55	8		FMA_2nd_AgedE10	7.66	8		FMA_2nd_ContE04	5.5	6		FMA_2nd_Aged-6-12E10	7.7	8		FMA_2nd_ContE04	7.08	7		FMA_2nd_AgedE10	9.3	9										FM_A_ControlE02	7.1	7	FM_A_AgedE08	6.33	6	FM_A_ControlE02		N/A	FM_A_AgedE08	6.65	7
FMA_2nd_ContE05	6.65	7		FMA_2nd_AgedE11	8.9	9		FMA_2nd_ContE05	6.5	7		FMA_2nd_Aged-6-12E11	7.12	7		FMA_2nd_ContE05	7.75	8		FMA_2nd_AgedE11	7.25	7										FM_A_ControlE03	7.9	8	FM_A_AgedE09	6.87	7	FM_A_ControlE03	7.14	7	FM_A_AgedE09	6.08	6
FMA_2nd_ContE06	7.51	8		FMA_2nd_AgedE12	6.49	6		FMA_2nd_ContE06	6.9	7		FMA_2nd_Aged-6-12E12	6.71	7		FMA_2nd_ContE06	7.2	7		FMA_2nd_AgedE12	7	7										FM_A_ControlE04	6.7	7	FM_A_AgedE10	6.26	6	FM_A_ControlE04	6.63	7	FM_A_AgedE10	6.9	7
FMA_2nd_ContF01	7.9	8		FMA_2nd_AgedF07	8.1	8		FMA_2nd_ContF01	6.1	6		FMA_2nd_Aged-6-12F07	7.19	7		FMA_2nd_ContF01	7.3	7		FMA_2nd_AgedF07	7.4	7										FM_A_ControlE05	6.35	6	FM_A_AgedE11	5.24	5	FM_A_ControlE05	6.87	7	FM_A_AgedE11	5.68	6
FMA_2nd_ContF02	7.3	7		FMA_2nd_AgedF08	8.5	9		FMA_2nd_ContF02	6.04	6		FMA_2nd_Aged-6-12F08	4.99	5		FMA_2nd_ContF02	8.3	8		FMA_2nd_AgedF08												FM_A_ControlE06	8	8	FM_A_AgedE12	5.82	6	FM_A_ControlE06	6.63	7	FM_A_AgedE12	7.36	7
FMA_2nd_ContF03	7.1	7		FMA_2nd_AgedF09				FMA_2nd_ContF03	7.5	8		FMA_2nd_Aged-6-12F09	6.7	7		FMA_2nd_ContF03				FMA_2nd_AgedF09												FM_A_ControlF01	8.5	9	FM_A_AgedF07	5.5	6	FM_A_ControlF01	6.39	6	FM_A_AgedF07	6.22	6
FMA_2nd_ContF04	7.2	7		FMA_2nd_AgedF10	7	7		FMA_2nd_ContF04	6.56	7		FMA_2nd_Aged-6-12F10	7.4	7		FMA_2nd_ContF04	8.4	8		FMA_2nd_AgedF10	6.96	7										FM_A_ControlF02	7.4	7	FM_A_AgedF08	6.19	6	FM_A_ControlF02	6.88	7	FM_A_AgedF08	4.93	5
FMA_2nd_ContF05	6.49	6		FMA_2nd_AgedF11	6.22	6		FMA_2nd_ContF05	8.1	8		FMA_2nd_Aged-6-12F11	7.05	7		FMA_2nd_ContF05	7.6	8		FMA_2nd_AgedF11	9.8	10										FM_A_ControlF03	6.95	7	FM_A_AgedF09	5.74	6	FM_A_ControlF03	7.46	7	FM_A_AgedF09	5.28	5
FMA_2nd_ContF06	7.7	8		FMA_2nd_AgedF12	7.69	8		FMA_2nd_ContF06	6.93	7		FMA_2nd_Aged-6-12F12	6.7	7		FMA_2nd_ContF06	8.2	8		FMA_2nd_AgedF12	6.63	7										FM_A_ControlF04	6.22	6	FM_A_AgedF10	5.52	6	FM_A_ControlF04	6.87	7	FM_A_AgedF10	5.8	6
FMA_2nd_ContG01	8.3	8		FMA_2nd_AgedG07	8.2	8		FMA_2nd_ContG01	6.6	7		FMA_2nd_Aged-6-12G07	6.65	7		FMA_2nd_ContG01	7	7		FMA_2nd_AgedG07	6.59	7										FM_A_ControlF05	7.57	8	FM_A_AgedF11	4.55	5	FM_A_ControlF05	6.91	7	FM_A_AgedF11	6.87	7
FMA_2nd_ContG02	6.78	7		FMA_2nd_AgedG08	6.56	7		FMA_2nd_ContG02	7.3	7		FMA_2nd_Aged-6-12G08	6.42	6		FMA_2nd_ContG02	7.2	7		FMA_2nd_AgedG08	7.14	7										FM_A_ControlF06	7.08	7	FM_A_AgedF12	6.26	6	FM_A_ControlF06	7.8	8	FM_A_AgedF12	4.94	5
FMA_2nd_ContG03	5.65	6		FMA_2nd_AgedG09	6.17	6		FMA_2nd_ContG03	6.65	7		FMA_2nd_Aged-6-12G09	6.09	6		FMA_2nd_ContG03	6.94	7		FMA_2nd_AgedG09												FM_A_ControlG01	6.7	7	FM_A_AgedG07	6.13	6	FM_A_ControlG01	6.6	7	FM_A_AgedG07	6.08	6
FMA_2nd_ContG04	6.2	6		FMA_2nd_AgedG10	6.5	7		FMA_2nd_ContG04	6.53	7		FMA_2nd_Aged-6-12G10	6.65	7		FMA_2nd_ContG04				FMA_2nd_AgedG10	7.1	7										FM_A_ControlG02	6.5	7	FM_A_AgedG08	6.2	6	FM_A_ControlG02	6.24	6	FM_A_AgedG08	6.72	7
FMA_2nd_ContG05	6.6	7		FMA_2nd_AgedG11	5.89	6		FMA_2nd_ContG05	8	8		FMA_2nd_Aged-6-12G11	6.6	7		FMA_2nd_ContG05	7.2	7		FMA_2nd_AgedG11	7.8	8										FM_A_ControlG03	9.5	10	FM_A_AgedG09	5.56	6	FM_A_ControlG03	7.3	7	FM_A_AgedG09	6.43	6
FMA_2nd_ContG06	8.6	9		FMA_2nd_AgedG12	7.7	8		FMA_2nd_ContG06	8.7	9		FMA_2nd_Aged-6-12G12	7.1	7		FMA_2nd_ContG06	8.2	8		FMA_2nd_AgedG12	7.2	7										FM_A_ControlG04	8.4	8	FM_A_AgedG10	5.89	6	FM_A_ControlG04	6.28	6	FM_A_AgedG10	6	6
FMA_2nd_ContH01	8	8		FMA_2nd_AgedH07	7.7	8		FMA_2nd_ContH01	5.7	6		FMA_2nd_Aged-6-12H07	6.49	6		FMA_2nd_ContH01	7	7		FMA_2nd_AgedH07	6.92	7										FM_A_ControlG05	7.7	8	FM_A_AgedG11	5.9	6	FM_A_ControlG05	5.15	5	FM_A_AgedG11	6.54	7
FMA_2nd_ContH02	7	7		FMA_2nd_AgedH08	7.2	7		FMA_2nd_ContH02	7.1	7		FMA_2nd_Aged-6-12H08	7.4	7		FMA_2nd_ContH02	5.36	5		FMA_2nd_AgedH08	7.7	8										FM_A_ControlG06	7.34	7	FM_A_AgedG12	5.82	6	FM_A_ControlG06	8.07	8	FM_A_AgedG12	5.09	5
FMA_2nd_ContH03	6.9	7		FMA_2nd_AgedH09	7.3	7		FMA_2nd_ContH03	6.7	7		FMA_2nd_Aged-6-12H09	5.96	6		FMA_2nd_ContH03	7.08	7		FMA_2nd_AgedH09												FM_A_ControlH01	6.7	7	FM_A_AgedH07	6.44	6	FM_A_ControlH01	6.9	7	FM_A_AgedH07	5.39	5
FMA_2nd_ContH04	7.2	7		FMA_2nd_AgedH10	7.5	8		FMA_2nd_ContH04	6.62	7		FMA_2nd_Aged-6-12H10	6.3	6		FMA_2nd_ContH04	7.4	7		FMA_2nd_AgedH10	7.3	7										FM_A_ControlH02	7.3	7	FM_A_AgedH08	5.7	6	FM_A_ControlH02	7.2	7	FM_A_AgedH08	7.57	8
FMA_2nd_ContH05	5.99	6		FMA_2nd_AgedH11	7.1	7		FMA_2nd_ContH05	6.7	7		FMA_2nd_Aged-6-12H11	7.6	8		FMA_2nd_ContH05	8.6	9		FMA_2nd_AgedH11	10.1	10										FM_A_ControlH03	5.72	6	FM_A_AgedH09	6.79	7	FM_A_ControlH03	6.39	6	FM_A_AgedH09	6.7	7
FMA_2nd_ContH06	9.5	10		FMA_2nd_AgedH12	7	7		FMA_2nd_ContH06				FMA_2nd_Aged-6-12H12				FMA_2nd_ContH06	7.7	8		FMA_2nd_AgedH12	6.69	7										FM_A_ControlH04	7.3	7	FM_A_AgedH10	6.82	7	FM_A_ControlH04	7.48	7	FM_A_AgedH10	6.66	7
																																FM_A_ControlH05	8.1	8	FM_A_AgedH11	7.2	7	FM_A_ControlH05	6.81	7	FM_A_AgedH11	5.5	6
																																FM_A_ControlH06	7.95	8	FM_A_AgedH12	5.9	6	FM_A_ControlH06	7.33	7	FM_A_AgedH12	6.39	6
