# Supplementary material for: Involvement of SPATA31 copy number variable genes in human lifespan
Source: Aging (Albany NY). 2018 Apr 19;10(4):674–88. doi: 10.18632/aging.101421 (PMC5940121; doi:10.18632/aging.101421)
Supplement: Supplementary Table S5 [file aging-10-101421-s006.xlsx]

## Sheet: Sheet1
Suppl. Table S5. Read Statistics Table for SPATA31A1 over expressing (pS1-S4) and Controls (pE1-E4)
	Sample	Total_Reads	Counted Reads
Controls	pE1	33797929	24185932
	pE2	68201241	47298587
	pE3	66019832	45939586
	pE4	64386441	44667969
SPATA31A1_O_Exp.	pS1	68619612	47793644
	pS2	63146776	44011032
	pS3	59421893	41189859
	pS4	66255838	45699279
	Average_SE	6.12312e+07	42598236
	Average_PE	3.06156e+07	21299118
